# Supplementary material for: Burden of disease among the world’s poorest billion people: An expert-informed secondary analysis of Global Burden of Disease estimates
Source: PubMed Central journal article supplement (PMC8366975; doi:10.1371/journal.pone.0253073), 2021-08-16
Supplement: pone.0253073.s001.pdf [file pone.0253073.s001.pdf]

## **Supplementary Appendix**

**Appendix Table 1: Poverty indicators used to define the poorest billion**

**Appendix Table 2: Country poverty estimates and inclusion in burden aggregation methods**

### **Analytic Approaches**

**Appendix Table 3: Characteristics of analytical burden groups**

### **Survey Methods and Acknowledgment**

**Appendix Table 4: Characteristics of expert survey respondents**

**Appendix Figure 1: Age and sex distributions of various populations**

**Appendix Table 5: Percent of the population below specified ages in various groups**

### **Survey of Expert Perceptions Results**

**Appendix Figure 2: Summary of expert perceptions of disease incidence and case fatality among the poorest billion compared to non-poorest in low- and middle-income countries, by disease groups**

**Appendix Table 6: Summary results from expert survey on perceptions of disease occurrence and fatality**

**Appendix Figure 3: Proportion of DALYs by broad cause groups, crude (a) and age-standardized (b); Rates of DALYs by broad cause groups, crude (c) and age-standardized (d), for five approaches to estimating the burden in the poorest billion and World Bank income groups**

**Appendix Figure 4: Cause-specific DALY Rates by Age**

**Appendix Figure 5: Percent of Cause-Specific DALYs by Age**

**Appendix Figure 6: Difference between DALY Rates in Poorest Billion and High-income Regions**

**Appendix Figure 7: Age-specific Percent of DALYs by Cause**

**Appendix Figure 8: Difference between DALY Rates in Poorest Billion and High-income Regions (NCDs and Injuries)**

**Appendix Figure 9: Difference between YLL Rates in Poorest Billion and High-income Regions**

**Appendix Figure 10: Difference between YLD Rates in Poorest Billion and High-income Regions**

**Appendix Figure 11: Difference between YLL Rates in Poorest Billion and High-income Regions (NCDs and Injuries)**

**Appendix Figure 12: Difference between YLD Rates in Poorest Billion and High-income Regions (NCDs and Injuries)**

**Comparison of Estimation Methods**

**Example Analysis**

**Appendix Table 7: Regression example results**

**Appendix Figure 13: Analysis example regression results**

**Appendix Table 1: Poverty indicators used to define the poorest billion**

|                           |                |                                                                                                                                                                                                                  |
|---------------------------|----------------|------------------------------------------------------------------------------------------------------------------------------------------------------------------------------------------------------------------|
| <b>Education</b>          | Schooling      | No household member has completed five years of schooling                                                                                                                                                        |
|                           | Attendance     | Any school-aged child in the household is not attending school up to class 8                                                                                                                                     |
| <b>Standard of living</b> | Electricity    | The household has no electricity                                                                                                                                                                                 |
|                           | Sanitation     | The household's sanitation facility is categorized as unimproved or it is shared with other households                                                                                                           |
|                           | Water          | The household does not have access to safe drinking water or safe water is more than a 30-minute walk, round trip                                                                                                |
|                           | Floor          | The household has a dirt, sand, or dung floor                                                                                                                                                                    |
|                           | Cooking fuel   | The household cooks with dung, wood, or charcoal                                                                                                                                                                 |
|                           | Assets         | The household does not own more than one of the following: radio, TV, telephone, bike, motorbike, or refrigerator; however, if the household owns a car or truck, it does not count as deprived in this category |
|                           | <b>Health*</b> | Child mortality                                                                                                                                                                                                  |
| Malnutrition              |                | Any adult under 70 years of age is undernourished in terms of BMI, or any child for whom there is nutritional information is undernourished in terms of weight-for-age.                                          |

\*Health indicators included in MPI from OPHI but excluded from our assessment. We defined the poorest billion as those living in households counted as deprived in five or more of the eight indicators. Surveys defined people in the household as “usual residents” in almost all cases (see appendix for exceptions).

**Appendix Table 2: Country poverty estimates and inclusion in burden aggregation methods**

| Location               | World Bank Income Group (2017) | GBD Burden Estimate Availability | Population in 2017 (GBD 2017) | Survey | Year | Population in Poorest Billion | Proportion of Population in Poorest Billion | Used in Country Aggregation Approach | Used in Poorest Billion Aggregation and Ecological Approaches |
|------------------------|--------------------------------|----------------------------------|-------------------------------|--------|------|-------------------------------|---------------------------------------------|--------------------------------------|---------------------------------------------------------------|
| Afghanistan            | LIC                            | Y                                | 32854767                      | DHS    | 2016 | 8250698                       | 25.10%                                      | F                                    | T                                                             |
| Albania                | U-MIC                          | Y                                | 2766162                       | DHS    | 2009 | 44                            | <0.1%                                       | F                                    | T                                                             |
| Algeria                | U-MIC                          | Y                                | 40463698                      | MICS   | 2013 | 107067                        | 0.30%                                       | F                                    | T                                                             |
| American Samoa         | U-MIC                          | Y                                | 55631                         | None   |      | 1130*                         | 2.0%*                                       | F                                    | T                                                             |
| Andorra                | HIC                            | Y                                | 79966                         | None   |      | ^                             | ^                                           | F                                    | F                                                             |
| Angola                 | L-MIC                          | Y                                | 28202299                      | None   |      | 4629653*                      | 16.4%*                                      | F                                    | T                                                             |
| Antigua and Barbuda    | HIC                            | Y                                | 88957                         | None   |      | ^                             | ^                                           | F                                    | F                                                             |
| Argentina              | HIC                            | Y                                | 44265909                      | None   |      | ^                             | ^                                           | F                                    | F                                                             |
| Armenia                | U-MIC                          | Y                                | 3027231                       | DHS    | 2010 | 0                             | <0.1%                                       | F                                    | T                                                             |
| Aruba                  | HIC                            | N                                |                               | None   |      | ^                             | ^                                           | F                                    | F                                                             |
| Australia              | HIC                            | Y                                | 23943082                      | None   |      | ^                             | ^                                           | F                                    | F                                                             |
| Austria                | HIC                            | Y                                | 8793125                       | None   |      | ^                             | ^                                           | F                                    | F                                                             |
| Azerbaijan             | U-MIC                          | Y                                | 10225021                      | DHS    | 2006 | 15050                         | 0.20%                                       | F                                    | T                                                             |
| Bahrain                | HIC                            | Y                                | 1470373                       | None   |      | ^                             | ^                                           | F                                    | F                                                             |
| Bangladesh             | L-MIC                          | Y                                | 156981002                     | DHS    | 2014 | 39593478                      | 25.20%                                      | F                                    | T                                                             |
| Barbados               | HIC                            | Y                                | 295884                        | MICS   | 2012 | 0                             | <0.1%                                       | F                                    | T                                                             |
| Belarus                | U-MIC                          | Y                                | 9491040                       | MICS   | 2005 | 0                             | <0.1%                                       | F                                    | T                                                             |
| Belgium                | HIC                            | Y                                | 11319411                      | None   |      | ^                             | ^                                           | F                                    | F                                                             |
| Belize                 | U-MIC                          | Y                                | 394958                        | MICS   | 2011 | 4004                          | 1.00%                                       | F                                    | T                                                             |
| Benin                  | LIC                            | Y                                | 11585301                      | DHS    | 2012 | 5147069                       | 44.40%                                      | T                                    | T                                                             |
| Bermuda                | HIC                            | Y                                | 65886                         | None   |      | ^                             | ^                                           | F                                    | F                                                             |
| Bhutan                 | L-MIC                          | Y                                | 957410                        | MICS   | 2010 | 105601                        | 11.00%                                      | F                                    | T                                                             |
| Bolivia                | L-MIC                          | Y                                | 11542995                      | DHS    | 2008 | 1672854                       | 14.50%                                      | F                                    | T                                                             |
| Bosnia and Herzegovina | U-MIC                          | Y                                | 3399239                       | MICS   | 2012 | 525                           | <0.1%                                       | F                                    | T                                                             |
| Botswana               | U-MIC                          | Y                                | 2281843                       | None   |      | 44967*                        | 2.0%*                                       | F                                    | T                                                             |
| Brazil                 | U-MIC                          | Y                                | 211812707                     | PNAD   | 2014 | 512627                        | 0.20%                                       | F                                    | T                                                             |

|                                         |       |   |            |              |      |          |        |   |   |
|-----------------------------------------|-------|---|------------|--------------|------|----------|--------|---|---|
| <b>British Virgin Islands</b>           | HIC   | N |            | None         |      | ^        | ^      | F | F |
| <b>Brunei</b>                           | HIC   | Y | 432451     | None         |      | ^        | ^      | F | F |
| <b>Bulgaria</b>                         | U-MIC | Y | 7052339    | None         |      | 158759*  | 2.2%*  | F | T |
| <b>Burkina Faso</b>                     | LIC   | Y | 21121966   | DHS          | 2010 | 13655378 | 64.70% | T | T |
| <b>Burundi</b>                          | LIC   | Y | 10905413   | DHS          | 2010 | 7937451  | 72.80% | T | T |
| <b>Cambodia</b>                         | L-MIC | Y | 16122383   | DHS          | 2014 | 2187088  | 13.60% | F | T |
| <b>Cameroon</b>                         | L-MIC | Y | 27769738   | DHS          | 2011 | 10101590 | 36.40% | T | T |
| <b>Canada</b>                           | HIC   | Y | 35982918   | None         |      | ^        | ^      | F | F |
| <b>Cape Verde</b>                       | L-MIC | Y | 545806     | None         |      | 86283*   | 15.8%* | F | T |
| <b>Cayman Islands</b>                   | HIC   | N |            | None         |      | ^        | ^      | F | F |
| <b>Central African Republic</b>         | LIC   | Y | 4622515    | MICS         | 2010 | 3459994  | 74.80% | T | T |
| <b>Chad</b>                             | LIC   | Y | 15222086   | DHS          | 2015 | 12578760 | 82.60% | T | T |
| <b>Channel Islands</b>                  | HIC   | N |            | None         |      | ^        | ^      | F | F |
| <b>Chile</b>                            | HIC   | Y | 17918235   | None         |      | ^        | ^      | F | F |
| <b>China</b>                            | U-MIC | Y | 1412480390 | CFPS         | 2014 | 1107398  | 0.10%  | F | T |
| <b>Colombia</b>                         | U-MIC | Y | 50606157   | DHS          | 2010 | 968253   | 1.90%  | F | T |
| <b>Comoros</b>                          | LIC   | Y | 718322     | DHS-<br>MICS | 2012 | 164201   | 22.90% | F | T |
| <b>Congo</b>                            | L-MIC | Y | 4913072    | DHS          | 2012 | 1545506  | 31.50% | F | T |
| <b>Costa Rica</b>                       | U-MIC | Y | 4653734    | None         |      | 94250*   | 2.0%*  | F | T |
| <b>Cote d'Ivoire</b>                    | L-MIC | Y | 24965279   | DHS          | 2012 | 7346601  | 29.40% | F | T |
| <b>Croatia</b>                          | HIC   | Y | 4275496    | None         |      | ^        | ^      | F | F |
| <b>Cuba</b>                             | U-MIC | Y | 11376669   | None         |      | 241571*  | 2.1%*  | F | T |
| <b>Curaçao</b>                          | HIC   | N |            | None         |      | ^        | ^      | F | F |
| <b>Cyprus</b>                           | HIC   | Y | 1262632    | None         |      | ^        | ^      | F | F |
| <b>Czech Republic</b>                   | HIC   | Y | 10592732   | None         |      | ^        | ^      | F | F |
| <b>Democratic Republic of the Congo</b> | LIC   | Y | 80884671   | DHS          | 2014 | 55750504 | 68.90% | T | T |
| <b>Denmark</b>                          | HIC   | Y | 5732278    | None         |      | ^        | ^      | F | F |
| <b>Djibouti</b>                         | L-MIC | Y | 1113100    | MICS         | 2006 | 175698   | 15.80% | F | T |
| <b>Dominica</b>                         | U-MIC | Y | 68933      | None         |      | 1444*    | 2.1%*  | F | T |
| <b>Dominican Republic</b>               | U-MIC | Y | 10451750   | MICS         | 2014 | 100245   | 1.00%  | F | T |

|                                       |       |                    |           |              |      |          |        |   |   |
|---------------------------------------|-------|--------------------|-----------|--------------|------|----------|--------|---|---|
| <b>Ecuador</b>                        | U-MIC | Y                  | 16686189  | ECV          | 2014 | 118784   | 0.70%  | F | T |
| <b>Egypt</b>                          | L-MIC | Y                  | 96484009  | DHS          | 2014 | 14539    | <0.1%  | F | T |
| <b>El Salvador</b>                    | L-MIC | Y                  | 6086947   | MICS         | 2014 | 153499   | 2.50%  | F | T |
| <b>Equatorial Guinea</b>              | U-MIC | Y                  | 1345031   | None         |      | 27277*   | 2.0%*  | F | T |
| <b>Eritrea</b>                        | LIC   | Y                  | 5859329   | None         |      | 2883986* | 49.2%* | T | T |
| <b>Estonia</b>                        | HIC   | Y                  | 1314543   | None         |      | ^        | ^      | F | F |
| <b>Ethiopia</b>                       | LIC   | Y                  | 102883938 | DHS          | 2011 | 83839933 | 81.50% | T | T |
| <b>Faroe Islands</b>                  | HIC   | N                  |           | None         |      | ^        | ^      | F | F |
| <b>Federated States of Micronesia</b> | L-MIC | Y                  | 103926    | None         |      | 16542*   | 15.9%* | F | T |
| <b>Fiji</b>                           | U-MIC | Y                  | 906939    | None         |      | 18245*   | 2.0%*  | F | T |
| <b>Finland</b>                        | HIC   | Y                  | 5517978   | None         |      | ^        | ^      | F | F |
| <b>France</b>                         | HIC   | Y                  | 65712599  | None         |      | ^        | ^      | F | F |
| <b>French Polynesia</b>               | HIC   | N                  |           | None         |      | ^        | ^      | F | F |
| <b>Gabon</b>                          | U-MIC | Y                  | 1702720   | DHS          | 2012 | 119855   | 7.00%  | F | T |
| <b>Georgia</b>                        | L-MIC | Y                  | 3691322   | MICS         | 2005 | 2585     | 0.10%  | F | T |
| <b>Germany</b>                        | HIC   | Y                  | 83294524  | None         |      | ^        | ^      | F | F |
| <b>Ghana</b>                          | L-MIC | Y                  | 30205292  | DHS          | 2014 | 3543527  | 11.70% | F | T |
| <b>Gibraltar</b>                      | HIC   | N                  |           | None         |      | ^        | ^      | F | F |
| <b>Greece</b>                         | HIC   | Y                  | 10402319  | None         |      | ^        | ^      | F | F |
| <b>Greenland</b>                      | HIC   | Y                  | 56155     | None         |      | ^        | ^      | F | F |
| <b>Grenada</b>                        | U-MIC | Y                  | 110879    | None         |      | 2351*    | 2.1%*  | F | T |
| <b>Guam</b>                           | HIC   | Y                  | 167837    | None         |      | ^        | ^      | F | F |
| <b>Guatemala</b>                      | U-MIC | Y                  | 16924208  | DHS          | 2015 | 1668125  | 9.90%  | F | T |
| <b>Guinea</b>                         | LIC   | Y                  | 11819987  | DHS-<br>MICS | 2012 | 6532382  | 55.30% | T | T |
| <b>Guinea-Bissau</b>                  | LIC   | Y                  | 1855540   | MICS         | 2014 | 973096   | 52.40% | T | T |
| <b>Guyana</b>                         | U-MIC | Y                  | 742302    | MICS         | 2014 | 13476    | 1.80%  | F | T |
| <b>Haiti</b>                          | LIC   | Y                  | 11824835  | DHS          | 2012 | 4612763  | 39.00% | T | T |
| <b>Honduras</b>                       | L-MIC | Y                  | 9498815   | DHS          | 2012 | 511853   | 5.40%  | F | T |
| <b>Hong Kong SAR, China</b>           | HIC   | Burden in<br>China |           | None         |      | ^        | ^      | F | F |
| <b>Hungary</b>                        | HIC   | Y                  | 9727364   | None         |      | ^        | ^      | F | F |

|                  |       |                    |            |          |      |           |        |   |   |
|------------------|-------|--------------------|------------|----------|------|-----------|--------|---|---|
| Iceland          | HIC   | Y                  | 337471     | None     |      | ^         | ^      | F | F |
| India            | L-MIC | Y                  | 1380560359 | IHDS     | 2012 | 197494714 | 14.30% | F | T |
| Indonesia        | L-MIC | Y                  | 258134673  | DHS      | 2012 | 9185428   | 3.60%  | F | T |
| Iran             | U-MIC | Y                  | 82176111   | None     |      | 1614551*  | 2.0%*  | F | T |
| Iraq             | U-MIC | Y                  | 43304442   | MICS     | 2011 | 297650    | 0.70%  | F | T |
| Ireland          | HIC   | Y                  | 4860552    | None     |      | ^         | ^      | F | F |
| Isle of Man      | HIC   | N                  |            | None     |      | ^         | ^      | F | F |
| Israel           | HIC   | Y                  | 8949198    | None     |      | ^         | ^      | F | F |
| Italy            | HIC   | Y                  | 60597480   | None     |      | ^         | ^      | F | F |
| Jamaica          | U-MIC | Y                  | 2779264    | JSLC     | 2012 | 12847     | 0.50%  | F | T |
| Japan            | HIC   | Y                  | 128363257  | None     |      | ^         | ^      | F | F |
| Jordan           | U-MIC | Y                  | 10648463   | DHS      | 2012 | 224       | <0.1%  | F | T |
| Kazakhstan       | U-MIC | Y                  | 17904334   | MICS     | 2015 | 0         | <0.1%  | F | T |
| Kenya            | L-MIC | Y                  | 48326776   | DHS      | 2014 | 18788645  | 38.90% | T | T |
| Kiribati         | L-MIC | Y                  | 118241     | None     |      | 18991*    | 16.1%* | F | T |
| Kosovo           | L-MIC | N                  |            | None     |      | *         | *      | F | F |
| Kuwait           | HIC   | Y                  | 4262200    | None     |      | ^         | ^      | F | F |
| Kyrgyzstan       | L-MIC | Y                  | 6368576    | MICS     | 2014 | 1815      | <0.1%  | F | T |
| Laos             | L-MIC | Y                  | 6970176    | MICS/DHS | 2012 | 1164406   | 16.70% | F | T |
| Latvia           | HIC   | Y                  | 1945427    | None     |      | ^         | ^      | F | F |
| Lebanon          | U-MIC | Y                  | 8511980    | None     |      | 170166*   | 2.0%*  | F | T |
| Lesotho          | L-MIC | Y                  | 1947578    | DHS      | 2014 | 489549    | 25.10% | F | T |
| Liberia          | LIC   | Y                  | 4722638    | DHS      | 2013 | 2280072   | 48.30% | T | T |
| Libya            | U-MIC | Y                  | 6908740    | PAPFAM   | 2007 | 981       | <0.1%  | F | T |
| Liechtenstein    | HIC   | N                  |            | None     |      | ^         | ^      | F | F |
| Lithuania        | HIC   | Y                  | 2847647    | None     |      | ^         | ^      | F | F |
| Luxembourg       | HIC   | Y                  | 590547     | None     |      | ^         | ^      | F | F |
| Macao SAR, China | HIC   | Burden in<br>China |            | None     |      | ^         | ^      | F | F |
| Macedonia        | U-MIC | Y                  | 2174828    | MICS     | 2011 | 852       | <0.1%  | F | T |
| Madagascar       | LIC   | Y                  | 26108785   | DHS      | 2009 | 17017274  | 65.20% | T | T |

|                                 |       |   |           |        |      |           |        |   |   |
|---------------------------------|-------|---|-----------|--------|------|-----------|--------|---|---|
| <b>Malawi</b>                   | LIC   | Y | 17191217  | DHS    | 2016 | 8329662   | 48.50% | T | T |
| <b>Malaysia</b>                 | U-MIC | Y | 30639828  | None   |      | 606871*   | 2.0%*  | F | T |
| <b>Maldives</b>                 | U-MIC | Y | 458601    | DHS    | 2009 | 66        | <0.1%  | F | T |
| <b>Mali</b>                     | LIC   | Y | 20253727  | DHS    | 2013 | 11757744  | 58.00% | T | T |
| <b>Malta</b>                    | HIC   | Y | 434472    | None   |      | ^         | ^      | F | F |
| <b>Marshall Islands</b>         | U-MIC | Y | 56311     | None   |      | 1121*     | 2.0%*  | F | T |
| <b>Mauritania</b>               | L-MIC | Y | 3913922   | MICS   | 2011 | 1684605   | 43.00% | T | T |
| <b>Mauritius</b>                | U-MIC | Y | 1272112   | None   |      | 25940*    | 2.0%*  | F | T |
| <b>Mexico</b>                   | U-MIC | Y | 126569720 | MICS   | 2015 | 303957    | 0.20%  | F | T |
| <b>Moldova</b>                  | L-MIC | Y | 3721820   | MICS   | 2012 | 10649     | 0.30%  | F | T |
| <b>Monaco</b>                   | HIC   | N |           | None   |      | ^         | ^      | F | F |
| <b>Mongolia</b>                 | L-MIC | Y | 3251426   | MICS   | 2013 | 408585    | 12.60% | F | T |
| <b>Montenegro</b>               | U-MIC | Y | 626318    | MICS   | 2013 | 573       | 0.10%  | F | T |
| <b>Morocco</b>                  | L-MIC | Y | 35488915  | PAPFAM | 2011 | 1836369   | 5.20%  | F | T |
| <b>Mozambique</b>               | LIC   | Y | 30035304  | DHS    | 2011 | 19563037  | 65.10% | T | T |
| <b>Myanmar</b>                  | L-MIC | Y | 52795004  | DHS    | 2016 | 6803003   | 12.90% | F | T |
| <b>Namibia</b>                  | U-MIC | Y | 2353503   | DHS    | 2013 | 596001    | 25.30% | F | T |
| <b>Nauru</b>                    | U-MIC | N |           | None   |      | *         | *      | F | F |
| <b>Nepal</b>                    | LIC   | Y | 29891524  | MICS   | 2014 | 3779226   | 12.60% | F | T |
| <b>Netherlands</b>              | HIC   | Y | 17029098  | None   |      | ^         | ^      | F | F |
| <b>New Caledonia</b>            | HIC   | N |           | None   |      | ^         | ^      | F | F |
| <b>New Zealand</b>              | HIC   | Y | 4448375   | None   |      | ^         | ^      | F | F |
| <b>Nicaragua</b>                | L-MIC | Y | 6396570   | DHS    | 2012 | 726171    | 11.30% | F | T |
| <b>Niger</b>                    | LIC   | Y | 21375946  | DHS    | 2012 | 16599772  | 77.70% | T | T |
| <b>Nigeria</b>                  | L-MIC | Y | 206087947 | DHS    | 2013 | 69834303  | 33.90% | T | T |
| <b>North Korea</b>              | LIC   | Y | 25716644  | None   |      | 12663055* | 49.2%* | T | T |
| <b>Northern Mariana Islands</b> | HIC   | Y | 44878     | None   |      | ^         | ^      | F | F |
| <b>Norway</b>                   | HIC   | Y | 5263178   | None   |      | ^         | ^      | F | F |
| <b>Oman</b>                     | HIC   | Y | 4535815   | None   |      | ^         | ^      | F | F |
| <b>Pakistan</b>                 | L-MIC | Y | 214287443 | DHS    | 2013 | 35051746  | 16.40% | F | T |
| <b>Palau</b>                    | HIC   | N |           | None   |      | ^         | ^      | F | F |



|                                         |       |   |           |          |      |          |        |   |   |
|-----------------------------------------|-------|---|-----------|----------|------|----------|--------|---|---|
| <b>Palestine</b>                        | L-MIC | Y | 4852097   | MICS     | 2014 | 0        | <0.1%  | F | T |
| <b>Panama</b>                           | HIC   | Y | 3921083   | None     |      | ^        | ^      | F | F |
| <b>Papua New Guinea</b>                 | L-MIC | Y | 9227551   | None     |      | 1473694* | 16.0%* | F | T |
| <b>Paraguay</b>                         | U-MIC | Y | 6931175   | None     |      | 140074*  | 2.0%*  | F | T |
| <b>Peru</b>                             | U-MIC | Y | 33219612  | DHS-Cont | 2012 | 2779379  | 8.40%  | F | T |
| <b>Philippines</b>                      | L-MIC | Y | 103470619 | DHS      | 2013 | 3380988  | 3.30%  | F | T |
| <b>Poland</b>                           | HIC   | Y | 38393061  | None     |      | ^        | ^      | F | F |
| <b>Portugal</b>                         | HIC   | Y | 10681712  | None     |      | ^        | ^      | F | F |
| <b>Puerto Rico</b>                      | HIC   | Y | 3665882   | None     |      | ^        | ^      | F | F |
| <b>Qatar</b>                            | HIC   | Y | 2747311   | None     |      | ^        | ^      | F | F |
| <b>Romania</b>                          | U-MIC | Y | 19433766  | None     |      | 429249*  | 2.2%*  | F | T |
| <b>Russian Federation</b>               | U-MIC | Y | 146189867 | None     |      | 3123509* | 2.1%*  | F | T |
| <b>Rwanda</b>                           | LIC   | Y | 12554172  | DHS      | 2015 | 6170616  | 49.10% | T | T |
| <b>Saint Lucia</b>                      | U-MIC | Y | 176474    | MICS     | 2012 | 316      | 0.20%  | F | T |
| <b>Saint Vincent and the Grenadines</b> | U-MIC | Y | 114112    | None     |      | 2361*    | 2.1%*  | F | T |
| <b>Samoa</b>                            | U-MIC | Y | 198918    | None     |      | 4127*    | 2.1%*  | F | T |
| <b>San Marino</b>                       | HIC   | N |           | None     |      | ^        | ^      | F | F |
| <b>Sao Tome and Principe</b>            | L-MIC | Y | 200206    | MICS     | 2014 | 17492    | 8.70%  | F | T |
| <b>Saudi Arabia</b>                     | HIC   | Y | 34444054  | None     |      | ^        | ^      | F | F |
| <b>Senegal</b>                          | LIC   | Y | 14688034  | DHS      | 2015 | 4526503  | 30.80% | F | T |
| <b>Serbia</b>                           | U-MIC | Y | 8874098   | MICS     | 2014 | 8619     | 0.10%  | F | T |
| <b>Seychelles</b>                       | HIC   | Y | 100907    | None     |      | ^        | ^      | F | F |
| <b>Sierra Leone</b>                     | LIC   | Y | 7829749   | DHS      | 2013 | 4871383  | 62.20% | T | T |
| <b>Singapore</b>                        | HIC   | Y | 5568481   | None     |      | ^        | ^      | F | F |
| <b>Sint Maarten (Dutch part)</b>        | HIC   | N |           | None     |      | ^        | ^      | F | F |
| <b>Slovakia</b>                         | HIC   | Y | 5419210   | None     |      | ^        | ^      | F | F |
| <b>Slovenia</b>                         | HIC   | Y | 2068856   | None     |      | ^        | ^      | F | F |
| <b>Solomon Islands</b>                  | L-MIC | Y | 637607    | None     |      | 102922*  | 16.1%* | F | T |
| <b>Somalia</b>                          | LIC   | Y | 16880386  | MICS     | 2006 | 12875624 | 76.30% | T | T |
| <b>South Africa</b>                     | U-MIC | Y | 54952860  | NIDS     | 2015 | 1314104  | 2.40%  | F | T |
| <b>South Korea</b>                      | HIC   | Y | 52670741  | None     |      | ^        | ^      | F | F |

|                                 |       |   |           |        |      |          |        |   |   |
|---------------------------------|-------|---|-----------|--------|------|----------|--------|---|---|
| <b>South Sudan</b>              | LIC   | Y | 9941010   | MICS   | 2010 | 8819371  | 88.70% | T | T |
| <b>Spain</b>                    | HIC   | Y | 46389213  | None   |      | ^        | ^      | F | F |
| <b>Sri Lanka</b>                | L-MIC | Y | 21596437  | None   |      | 3465702* | 16.1%* | F | T |
| <b>St. Kitts and Nevis</b>      | HIC   | N |           | None   |      | ^        | ^      | F | F |
| <b>St. Martin (French part)</b> | HIC   | N |           | None   |      | ^        | ^      | F | F |
| <b>Sudan</b>                    | L-MIC | Y | 40255551  | MICS   | 2014 | 18536578 | 46.00% | T | T |
| <b>Suriname</b>                 | U-MIC | Y | 572463    | MICS   | 2010 | 12875    | 2.20%  | F | T |
| <b>Swaziland</b>                | L-MIC | Y | 1124436   | MICS   | 2014 | 102401   | 9.10%  | F | T |
| <b>Sweden</b>                   | HIC   | Y | 10044996  | None   |      | ^        | ^      | F | F |
| <b>Switzerland</b>              | HIC   | Y | 8593087   | None   |      | ^        | ^      | F | F |
| <b>Syria</b>                    | LIC   | Y | 18131194  | PAPFAM | 2009 | 12364    | 0.10%  | F | T |
| <b>Taiwan</b>                   | HIC   | Y | 23583126  | None   |      | ^        | ^      | F | F |
| <b>Tajikistan</b>               | LIC   | Y | 9243717   | DHS    | 2012 | 84087    | 0.90%  | F | T |
| <b>Tanzania</b>                 | LIC   | Y | 53973136  | DHS    | 2016 | 30353223 | 56.20% | T | T |
| <b>Thailand</b>                 | U-MIC | Y | 70626063  | MICS   | 2012 | 34427    | <0.1%  | F | T |
| <b>The Bahamas</b>              | HIC   | Y | 375441    | None   |      | ^        | ^      | F | F |
| <b>The Gambia</b>               | LIC   | Y | 2132510   | DHS    | 2013 | 503255   | 23.60% | F | T |
| <b>Timor-Leste</b>              | L-MIC | Y | 1287486   | DHS    | 2010 | 659356   | 51.20% | T | T |
| <b>Togo</b>                     | LIC   | Y | 7516030   | DHS    | 2014 | 2344458  | 31.20% | F | T |
| <b>Tonga</b>                    | U-MIC | Y | 102838    | None   |      | 2126*    | 2.1%*  | F | T |
| <b>Trinidad and Tobago</b>      | HIC   | Y | 1391805   | MICS   | 2006 | 503      | <0.1%  | F | T |
| <b>Tunisia</b>                  | L-MIC | Y | 11442183  | MICS   | 2012 | 22155    | 0.20%  | F | T |
| <b>Turkey</b>                   | U-MIC | Y | 80456851  | None   |      | 1635775* | 2.0%*  | F | T |
| <b>Turkmenistan</b>             | U-MIC | Y | 4976883   | MICS   | 2016 | 0        | <0.1%  | F | T |
| <b>Turks and Caicos Islands</b> | HIC   | N |           | None   |      | ^        | ^      | F | F |
| <b>Tuvalu</b>                   | U-MIC | N |           | None   |      | *        | *      | F | F |
| <b>Uganda</b>                   | LIC   | Y | 39078382  | DHS    | 2011 | 22831657 | 58.40% | T | T |
| <b>Ukraine</b>                  | L-MIC | Y | 44689084  | MICS   | 2012 | 4751     | <0.1%  | F | T |
| <b>United Arab Emirates</b>     | HIC   | Y | 9734100   | None   |      | ^        | ^      | F | F |
| <b>United Kingdom</b>           | HIC   | Y | 66635515  | None   |      | ^        | ^      | F | F |
| <b>United States</b>            | HIC   | Y | 324839024 | None   |      | ^        | ^      | F | F |

|                             |       |   |          |      |      |         |        |   |   |
|-----------------------------|-------|---|----------|------|------|---------|--------|---|---|
| <b>Uruguay</b>              | HIC   | Y | 3421532  | None |      | ^       | ^      | F | F |
| <b>Uzbekistan</b>           | L-MIC | Y | 32236895 | MICS | 2006 | 23459   | 0.10%  | F | T |
| <b>Vanuatu</b>              | L-MIC | Y | 287568   | MICS | 2007 | 79805   | 27.80% | F | T |
| <b>Venezuela</b>            | U-MIC | Y | 30831741 | None |      | 620769* | 2.0%*  | F | T |
| <b>Vietnam</b>              | L-MIC | Y | 96140732 | MICS | 2014 | 817839  | 0.80%  | F | T |
| <b>Virgin Islands, U.S.</b> | HIC   | Y | 104952   | None |      | ^       | ^      | F | F |
| <b>Yemen</b>                | LIC   | Y | 30449159 | DHS  | 2013 | 6310934 | 20.70% | F | T |
| <b>Zambia</b>               | L-MIC | Y | 17364088 | DHS  | 2014 | 8113994 | 46.70% | T | T |
| <b>Zimbabwe</b>             | LIC   | Y | 14713754 | DHS  | 2015 | 4204692 | 28.60% | F | T |

^ High income country, no survey data, assumed 0% in the poorest billion

\* LMIC, no survey data, used age- and sex-specific average across countries in income category

Following the methodology used by the Oxford Poverty and Human Development Initiative, on almost every survey, the members of the household counted are “usual residents,” except for the following three cases. On the Jamaica JSLC, people who spent the night prior to the interview were considered household members (de facto population). In the case of Ecuador ECV, individuals listed in the household except for 'pensioners' and 'other non-relatives' were considered members of the household. In the case of India IHDS, people interviewed who 'live and take meals in this house' were considered members of the household.

## Analytic Approaches

A summary of the different analytic approaches is given in Appendix Table 3. Details on the methods are presented below, and differences in results are discussed in the discussion section of the main text and appendix. Results presented in the main text are from the Selective Ecological approach.

**Appendix Table 3: Characteristics of analytical burden groups**

| Method Name                        | Countries Included | Total Population Included | Description of Population                                                                                  | Burden Methods Notes                                                                                                                                                                                                                                                                             |
|------------------------------------|--------------------|---------------------------|------------------------------------------------------------------------------------------------------------|--------------------------------------------------------------------------------------------------------------------------------------------------------------------------------------------------------------------------------------------------------------------------------------------------|
| <b>Low-income</b>                  | 34                 | 725 million               | Low-income countries by World Bank per capita income definition                                            | Sum of country-level burden                                                                                                                                                                                                                                                                      |
| <b>Country Aggregation</b>         | 31                 | 873 million               | Poorest countries ranked by extreme poverty prevalence on poverty index                                    | Sum of country-level burden                                                                                                                                                                                                                                                                      |
| <b>Poorest Billion Aggregation</b> | 139                | 873 million               | Population in 139 countries living in households deprived in five of eight indicators on the poverty index | Age- and sex-specific rates assumed homogeneous across wealthy/poor within countries, but burden aggregated using fractions of country population in poorest billion by our survey definition                                                                                                    |
| <b>Full Ecological</b>             | 139                | 873 million               | Population in 139 countries living in households deprived in five of eight indicators on the poverty index | Predictions of age- and sex-specific rates based on cross-country ecological relationships for those in extreme poverty and not in extreme poverty, scaled to country-level GBD estimates                                                                                                        |
| <b>Selective Ecological</b>        | 139                | 873 million               | Population in 139 countries living in households deprived in five of eight indicators on the poverty index | Same as Full Ecological approach, but ecological predictions only used for conditions that show concordance between ecological relationships and expert perceptions of within-country relationships between poverty and disease. Poorest Billion Aggregation approach used for other conditions. |

As described in the main text, each of these approaches utilized national-level estimates of disease burden from the Global Burden of Disease Study 2017.<sup>1-3</sup>

### *Low-Income Approach*

For the Low-Income approach, we used the publicly available GBD estimates to aggregate the disease burden in countries defined as low-income by the World Bank 2017 calendar year income groups.<sup>4</sup> The size of the population in low-income countries (725 million) was not the same as for our other definitions, but it serves as a familiar group of reference. We use the disease burden in other World Bank income groups (lower-middle-income, upper-middle-income, high-income) for comparison. In addition, we show results for “high-income regions,” which we aggregated from the following GBD regions: Western Europe, high-income North America, high-income Asia-Pacific, and Australasia (Australia and New

Zealand). The main distinction from the World Bank high-income countries was the exclusion of some of the countries whose per capita wealth is driven largely by oil and whose health patterns less closely match other high-income countries. About 54% of the population in the poorest billion as defined by our poverty index lived outside of countries classified as Low Income.

### ***Country Aggregation Approach***

Like the 1999 Gwatkin analysis, we defined the population in the poorest billion for the Country Aggregation approach without using poverty measures to disaggregate populations within countries.<sup>5</sup> Gwatkin and colleagues defined the global poor as the people living in the poorest countries by per capita gross domestic product (GDP), aggregated by rank to cumulatively sum to 20% of the global population, close to 1 billion people at the time. In contrast, we used national prevalence of the poorest billion from our household poverty index definition to define country ranking. To reach the same total population as in our poorest billion as defined by our poverty index (873 million), we took the first 30 countries from this list, as well as 82% of the population and burden (for each age and sex group) of the 31<sup>st</sup> country, Nigeria. The set of countries in the Country Aggregation approach and Low-Income approach were largely congruent, but there were seven countries in the Country Aggregation approach that are not present in the Low-Income approach and ten countries present in the Low-Income approach that were not present in the Country Aggregation approach because of differences in per capita GDP and prevalence of extreme poverty on our poverty index. The low-income countries not included in the Country Aggregation approach were Afghanistan, Comoros, Nepal, Senegal, Syria, Tajikistan, The Gambia, Togo, Yemen, and Zimbabwe. Meanwhile, the countries in the Country Aggregation approach that were not included in the set of low-income countries are Cameroon, Kenya, Mauritania, Nigeria, Sudan, Timor-Leste, and Zambia. The Low-Income and Country Aggregation approaches defined the poorest billion in a manner that allowed the use of more established country-level disease burden estimates; however, they did not fully utilize information about where the poorest live from our poverty index. About 43% of the population in the poorest billion defined by our poverty index lived outside of the countries included in the country aggregation approach.

### ***Poorest Billion Aggregation Approach***

For the Poorest Billion Aggregation approach, we used the country-level rates of burden as the rates for both the poorest billion and non-poorest within the country. The aggregate poorest billion burden was created by multiplying age- and sex-specific rates of the relevant measures (deaths, YLLs, YLDs, DALYs) by the corresponding age- and sex-specific populations in the poorest billion, by location. For example the total number for a given measure,  $m$ , in age  $a$ , and sex  $s$  in location  $l$  is given by:

$$Count_{m,a,s,l}^{Poorest\ Billion} = Rate_{m,a,s,l}^{National\ GBD} * Population_{a,s,l}^{Poorest\ Billion}$$

The total of any measure of disease for the poorest billion was then created by aggregating the burden across locations. This strategy did not distinguish the within-country differences in burden between the poorest billion and the non-poorest, only accounting for the diverse geographic locations in which the poorest billion live. In effect, this assumed homogeneous burden across poverty levels within countries should bias results towards showing less difference in disease burden between the wealthy and the poorest. Some approximation of the within-country differences would be necessary to accurately estimate the disease burden.

### ***Full Ecological Analysis Approach***

Comprehensive empirical data describing rates of disease by individual poverty status within LMICs are largely unavailable. For the Ecological Analysis approaches we used the relationships of disease rates across countries with respect to the prevalence of the poorest billion to make assumptions about possible

within-country differences in disease rates by poverty. We modeled the log of the death and YLD rates in location,  $l$ , on the percent of population in the poorest billion,  $PPB_l$ , with a random intercept on the region,  $r$ , to better isolate the associations with poverty prevalence rather than regional differences (for each age and sex group separately):

$$\log(\text{Measure rate}_l) = \beta_0 + \beta_1 PPB_l + \gamma_r + \varepsilon$$

We limited the set of countries included in this model to those for which we had survey estimates of extreme poverty and with prevalence of poorest billion populations of at least 2% in the given age-sex group so that variations in other factors among countries with no poverty prevalence did not drive the association. We then made predictions for the rate of the deaths and YLDs for hypothetical groups in which 100% of the population is in the poorest billion and 0% of the population is in the poorest billion by substituting these for  $PPB_l$ . These predicted rates were then rescaled using the poorest billion and non-poorest populations in each of the 139 countries to aggregate to the national GBD estimates. The below equation shows how a scalar was derived to rescale the rates for the poorest billion and non-poorest within each country such that they aggregate to the national estimates, where  $pb$  indicates poorest billion and  $npb$  indicates non-poorest for a given location,  $l$ , age,  $a$ , sex,  $s$ , and cause of death or disability,  $c$ .

$$k(\text{Rate}_{l,a,s,c}^{pb} * \text{Pop}_{l,a,s}^{pb} + \text{Rate}_{l,a,s,c}^{npb} * \text{Pop}_{l,a,s}^{npb}) = \text{Rate}_{l,a,s,c}^{GBD} * \text{Pop}_{l,a,s}^{GBD}$$

After solving for the scalar  $k$ , it was multiplied by the predicted rates among the poorest billion and non-poorest to calculate rates in the poorest billion and non-poorest populations in the given age and sex group. This method preserved the same ratio of poorest billion to non-poor rates across countries but ensured that the age- and sex-specific results for the poorest billion and non-poorest aggregate to the national GBD results. For the Full Ecological Analysis approach, we modeled every condition except for those in which the number of countries with non-zero rates in a given age and sex group was too small (fewer than 10 countries) to create stable results. We used the national-level death and YLD rates for both the poorest and non-poorest for these conditions.

### ***Selective Ecological Analysis Approach***

In the Selective Ecological Analysis approach, we used the methods described for the Full Ecological Analysis Approach but chose to model only conditions for which the ecological relationship might plausibly represent the relationship between poverty and disease within countries. To choose the conditions for which we used the results from the ecological model, we first conducted a survey of perceived relationships between poverty and disease in LMICs among 97 health practitioners and researchers with a broad range of disease expertise and experience working in or researching health in LMICs. Respondents came from three broad categories: (1) commissioners on the *Lancet* NCDI Poverty Commission, (2) members of the 11 national NCDI Poverty Commissions and Groups associated with the *Lancet* Commission, and (3) experts identified in specific disease areas to ensure coverage of the diverse set of diseases in the GBD. We acknowledge each of the participants in the appendix. Descriptive characteristics of the respondents are included later in the appendix, including region of residence, region of expertise, areas of work (clinical, research), and experience in LMICs. Participants answered questions about their perceived relationships between rates of diseases and poverty within LMICs, indicating whether they thought occurrence (defined in survey instructions as incidence) rates and fatality (defined as case fatality) rates were (1) much higher in the non-poorest, (2) higher in the non-poorest, (3) not different, (4) higher in the poorest, or (5) much higher in the poorest. The survey also asked respondents how confident they were in their selection.

For graphical representation of the results, we display the range of responses from “Much Higher in the Non-Poor” to “Much Higher in the Poor” on a continuous scale with each answer one unit apart (i.e. “Much Higher in the Non-Poor” = -2, “Higher in the Non-Poor” = -1, “No Difference” = 0, “Higher in the

Poor” = 1, “Much Higher in the Poor” = 2). For statistical analysis, we treated these answers as ordinal and used the non-parametric one sample, two-sided sign test to test for a difference in the median from the “No Difference” response. We described uncertainty using the spread of the responses and the self-reported certainty about each answer.

To choose conditions to model using the Selective Ecological Approach, we found the set of conditions with significant differences in rates between poorest billion and non-poorest from the expert perception survey and which showed agreement with the direction of the association in the ecological model in over half of age groups. For those conditions, we used the estimates from the Full Ecological Analysis. For conditions without agreement between expert opinion and the ecological associations, we used the national-level death and YLD rates for both the poorest and non-poorest.

### ***Methodological Consistency***

To ensure consistency in how we aggregated conditions for the ecological analysis approaches, we conducted these regressions and predictions at the lowest-level causes within the GBD hierarchy and aggregated up levels (e.g. ischemic heart disease aggregated to cardiovascular diseases, then to NCDs). We also wanted to ensure consistency in the measures of burden. In GBD, YLLs are calculated using age-sex-specific differences between ages of death and a standard life expectancy. In instances in which we used the ecological predictions, we created YLLs directly from our predicted deaths by multiplying the country-level age-, sex-, and cause-specific YLL to death ratios by the predicted deaths. We created DALYs by adding YLDs and YLLs. To ensure consistency in aggregate age groups or for both sexes combined, we created aggregate results by adding the most specific age and sex groupings. We created age-standardized results using the GBD 2017 population age standard.<sup>2</sup>

### ***References***

- 1 Kyu HH, Abate D, Abate KH, *et al.* Global, regional, and national disability-adjusted life-years (DALYs) for 359 diseases and injuries and healthy life expectancy (HALE) for 195 countries and territories, 1990–2017: a systematic analysis for the Global Burden of Disease Study 2017. *The Lancet* 2018; **392**: 1859–922.
- 2 Roth GA, Abate D, Abate KH, *et al.* Global, regional, and national age-sex-specific mortality for 282 causes of death in 195 countries and territories, 1980–2017: a systematic analysis for the Global Burden of Disease Study 2017. *The Lancet* 2018; **392**: 1736–88.
- 3 James SL, Abate D, Abate KH, *et al.* Global, regional, and national incidence, prevalence, and years lived with disability for 354 diseases and injuries for 195 countries and territories, 1990–2017: a systematic analysis for the Global Burden of Disease Study 2017. *The Lancet* 2018; **392**: 1789–858.
- 4 The World Bank. World Bank Country and Lending Groups. 2019. <https://datahelpdesk.worldbank.org/knowledgebase/articles/906519-world-bank-country-and-lending-groups> (accessed June 11, 2020).
- 5 Gwatkin DR, Guillot M. The Burden of Disease among the Global Poor: Current Situation, Future Trends, and Implications for Strategy. Washington (DC): The World Bank and Global Forum for Health Research, 1999.

## Survey Methods and Acknowledgment

Survey participants were recruited from three broad categories: (1) commissioners on the *Lancet* NCDI Poverty Commission, (2) members of the 11 national NCDI Poverty Groups associated with the *Lancet* Commission, and (3) experts identified in specific disease areas to ensure coverage of the diverse set of diseases in the GBD. Recruitment was via email. The survey was conducted June 7, 2017 to September 30, 2017.

We deeply appreciate the time and contributions that each of the experts made in participating in the survey, listed below.

Abdul Qadir Qadir, Abha Shrestha, Abraham Haileamlak, Adamson Muula, Agnes Binagwaho, Allison Linden, Amelia (Mia) Crampin, Ann Miller, Aruyaru Stanley Mwenda, Benjamin Massenburg, Bhagawan Koirala, Bhaskar Pant, Bistra Zheleva, Bongani Mayosi, Crispin Gishoma, D Cristina Stefan, Dagnaw Wubaye Walelgne, Damian Hoy, Daniel Vigo, Dinesh Neupane, Mariam Kalomo, Cyprian Kamau, Eleana Stoufi, Eugene Richardson, Farhad Farewar, Ferozuddin Feroz, Fred Amegashie, Gedeon Ngoga, Gertrudes Machatine, Gladwell Gathecha, Hanna Kaade, Hema Magge, Hideki Higashi, Homa Akseer, Jacques Clerville, Jane Barrow, Jason Beste, Jean Pascal Blaise Uhagaze, Jennifer Furin, John Chipolombwe, John G Meara, John H. Kempen, Joia Mukherjee, Jonathan Steer-Massaró, Jones Masiye, Joseph Mucumbitsi, Judith Lindert, Julia von Oettingen, Julie Makani, Katie Cundale, Kerry Vaughan, Krishna Kumar Aryal, Leo Masamba, Liesl Zuhlke, Lillian Gondwe-Chunda, Loise Nyanjau, Luckson Dullie, Luke L. Bawo, Marie Nancy Charles Larco, Michael Udedi, Mieraf Tadesse Tolla, Muhimpundu Marie Aimee, Munirat Ogunlayi, Natasha Archer, Neil Gupta, Nelya Melnitchouk, Nicholas Campaign, Nobhojit Roy, Oriol Mitjà, Paul Heidekrueger, Piet Noë, Rachel Koch, Rachel Nugent, Roderick Hay, Roger Jean-Charles, Sabrina Juran, Sam Patel, Sam Slewion, Samuel Oti, Sanctus Musafiri, Sarah Averbach, Saroj Ojha, Shada Rouhani, Sonya Shin, Thomas Koestler, Thomas Randall, Tim Walker, Valeria Macias, Valerie Luyckx, Wilnique Pierre, Yassir Turki, Yogesh Jain, Yogeshwar Kalkonde, Yoseph Mamo Azmera

The survey was administered online using the web browser-based Qualtrics interface. The survey typically took respondents between 10 and 45 minutes, though respondents were allowed to pause and return to the survey at a later time. The survey consisted of questions about the respondent's geographic background, training, and areas of expertise, followed by questions about the relationship between disease rates and poverty in disease areas with which the respondent self-identified as having experience. Some respondents had clinical experience, while others had epidemiological or research experience with the conditions. Appendix Table 1 describes the characteristics of the respondents in more detail.

Before participants answered questions on poverty and disease, they were presented with descriptions of the multidimensional definition of poverty that we used. They were given context for percentages of the population in a range of countries in the poorest billion. They were then asked to answer the questions with regard to those in the poorest billion versus the non-poorest within an LMIC. They were asked questions about both occurrence (incidence) and fatality (case fatality) of the diseases in the categories for which they had experience, expressing both their perception of the relationship between the disease and poverty, as well as their confidence in their response. We chose qualitative categorizations because we received feedback from pilot surveys that asking for quantitative estimates about these relationships was too difficult. The categories that respondents could choose were "Much Higher in the Non-Poor", "Higher in the Non-Poor", "No Difference", "Higher in the Poor", and "Much Higher in the Poor."



We also identified four out of the total 97 respondents who had either internally inconsistent responses or whose responses did not match the content of the survey and removed those outliers from the results.

**Appendix Table 4: Characteristics of expert survey respondents**

|                                                    | <b>Category</b>                                                             | <b>Number of Respondents (Percentage)</b> |
|----------------------------------------------------|-----------------------------------------------------------------------------|-------------------------------------------|
| <b>Gender</b>                                      | Female                                                                      | 40 (41.2%)                                |
| <b>Region of Nationality</b>                       | High-Income                                                                 | 37 (38.1%)                                |
|                                                    | Latin America and Caribbean                                                 | 6 (6.2%)                                  |
|                                                    | Central Europe, Eastern Europe, Central Asia                                | 2 (2.1%)                                  |
|                                                    | North Africa and Middle East                                                | 2 (2.1%)                                  |
|                                                    | South Asia                                                                  | 13 (13.7%)                                |
|                                                    | Sub-Saharan Africa                                                          | 37 (38.1%)                                |
| <b>Region of Residence</b>                         | High-Income                                                                 | 33 (34.0%)                                |
|                                                    | Latin America and Caribbean                                                 | 4 (4.1%)                                  |
|                                                    | North Africa and Middle East                                                | 1 (1.0%)                                  |
|                                                    | South Asia                                                                  | 13 (13.4%)                                |
|                                                    | Southeast Asia, East Asia, and Oceania                                      | 1 (1.0%)                                  |
|                                                    | Sub-Saharan Africa                                                          | 45 (46.4%)                                |
| <b>Regions of Expertise (can be more than one)</b> | East Asia and Pacific                                                       | 13 (13.4%)                                |
|                                                    | Europe and Central Asia                                                     | 8 (8.2%)                                  |
|                                                    | Latin America and Caribbean                                                 | 24 (24.7%)                                |
|                                                    | Middle East and North Africa                                                | 6 (6.2%)                                  |
|                                                    | South Asia                                                                  | 19 (19.6%)                                |
|                                                    | Sub-Saharan Africa                                                          | 69 (71.1%)                                |
| <b>Areas of Work (can be more than one)</b>        | Clinical                                                                    | 67 (69.1%)                                |
|                                                    | Epidemiology/Health Metrics                                                 | 34 (35.1%)                                |
|                                                    | Health Systems/Health Policy                                                | 52 (53.6%)                                |
|                                                    | Other (demography, ethics, social science, education, health communication) | 9 (9.3%)                                  |
| <b>Training (can be more than one)</b>             | Medical Doctor, Nurse, or equivalent                                        | 78 (80.4%)                                |
|                                                    | PhD or equivalent                                                           | 24 (24.7%)                                |
|                                                    | Master's in Public Health or Science                                        | 44 (45.4%)                                |
|                                                    | None of the Above                                                           | 0 (0%)                                    |
| <b>Years of Experience on Health in LMICs</b>      | <2 years                                                                    | 4 (4.1%)                                  |
|                                                    | 2-4 years                                                                   | 9 (9.3%)                                  |
|                                                    | 5-9 years                                                                   | 20 (20.6%)                                |
|                                                    | 10-19 years                                                                 | 36 (37.1%)                                |
|                                                    | 20+ years                                                                   | 28 (28.9%)                                |

To inform which conditions we modeled for the Selective Ecological Approach, we identified conditions for which experts perceived significant differences in either fatality or occurrence between the poorest and non-poorest. The underlying assumptions are that YLDs follow incidence and that increases in either incidence or case fatality lead to increases in death rates. We chose to model only conditions for which there was relative certainty based on expert responses. The decisions to model can be summarized as follows, where the default decision is not to use the ecological model:

For purely nonfatal conditions in the GBD study:

If there was a significant difference in occurrence based on the expert survey AND the direction of that difference was the same as the direction for YLDs from the ecological model, we used the modeled results

For conditions that can be fatal in the GBD study:

If there was a significant difference in fatality or occurrence based on the expert survey AND the direction of the expert perceptions for fatality and occurrence were not in opposite directions from each other AND the direction of the result from the expert survey was in the same direction of the death rate from the ecological model, we used the ecological model.

Since the death rate affects the prevalence and therefore YLDs, if we used the model for the death rate, we used the model for YLDs as well. For some conditions, the direction of the associations in the ecological analysis varied by age. In some cases, that makes logical sense- higher death rates at younger ages can lead to lower death rates at older ages if it leads to fewer people with the condition. We chose to model conditions if the above rules were met in at least 50% of age groups and in both sexes (or, for sex-specific diseases like maternal disorders, then for that one sex). If criteria for using the ecological relationship were not met, we assumed no difference in rates between the poorest and non-poorest within countries (see methods description for Selective Ecological Approach).

The initial survey was conducted using a cause list from a previous version of the GBD Study—some conditions were mapped between the survey and the GBD 2017 cause list for assessment.

The list of conditions for which we used the ecological associations in the Selective Ecological Approach is below.

Acute hepatitis A, Acute hepatitis B, Acute hepatitis C, Acute hepatitis E, African trypanosomiasis, Ascariasis, Cervical cancer, Chlamydial infection, Cirrhosis and other chronic liver diseases due to alcohol use, Cirrhosis and other chronic liver diseases due to hepatitis B, Cirrhosis and other chronic liver diseases due to hepatitis C, Coal workers pneumoconiosis, Cutaneous and mucocutaneous leishmaniasis, Cystic echinococcosis, Cysticercosis, Diarrheal diseases, Dietary iron deficiency, Diphtheria, Drowning, Drug-susceptible tuberculosis, Ectopic pregnancy, Environmental heat and cold exposure, Epilepsy, Esophageal cancer, Falls, Fire, heat, and hot substances, Foreign body in eyes, Fungal skin diseases, Genital herpes, Gonococcal infection, Gout, H influenzae type B meningitis, HIV/AIDS-Drug-susceptible Tuberculosis, HIV/AIDS resulting in other diseases, Hookworm disease, Indirect maternal deaths, Intracerebral hemorrhage, Invasive Non-typhoidal Salmonella (iNTS), Iodine deficiency, Late maternal deaths, Leprosy, Liver cancer due to alcohol use, Liver cancer due to hepatitis B, Liver cancer due to hepatitis C, Lower respiratory infections, Lymphatic filariasis, Malaria, Maternal abortion and

miscarriage, Maternal deaths aggravated by HIV/AIDS, Maternal hemorrhage, Maternal hypertensive disorders, Maternal obstructed labor and uterine rupture, Maternal sepsis and other maternal infections, Measles, Meningococcal meningitis, Multidrug-resistant tuberculosis without extensive drug resistance, Neonatal encephalopathy due to birth asphyxia and trauma, Neonatal preterm birth, Neonatal sepsis and other neonatal infections, Neural tube defects, Non-venomous animal contact, Onchocerciasis, Other meningitis, Other pneumoconiosis, Otitis media, Paratyphoid fever, Peptic ulcer disease, Pneumococcal meningitis, Protein-energy malnutrition, Rabies, Rheumatic heart disease, Scabies, Schistosomiasis, Subarachnoid hemorrhage, Syphilis, Tetanus, Trachoma, Trichomoniasis, Trichuriasis, Typhoid fever, Upper respiratory infections, Varicella and herpes zoster, Venomous animal contact, Visceral leishmaniasis, Vitamin A deficiency, Whooping cough, Yellow fever

**Appendix Figure 1: Age and sex distributions of various populations**

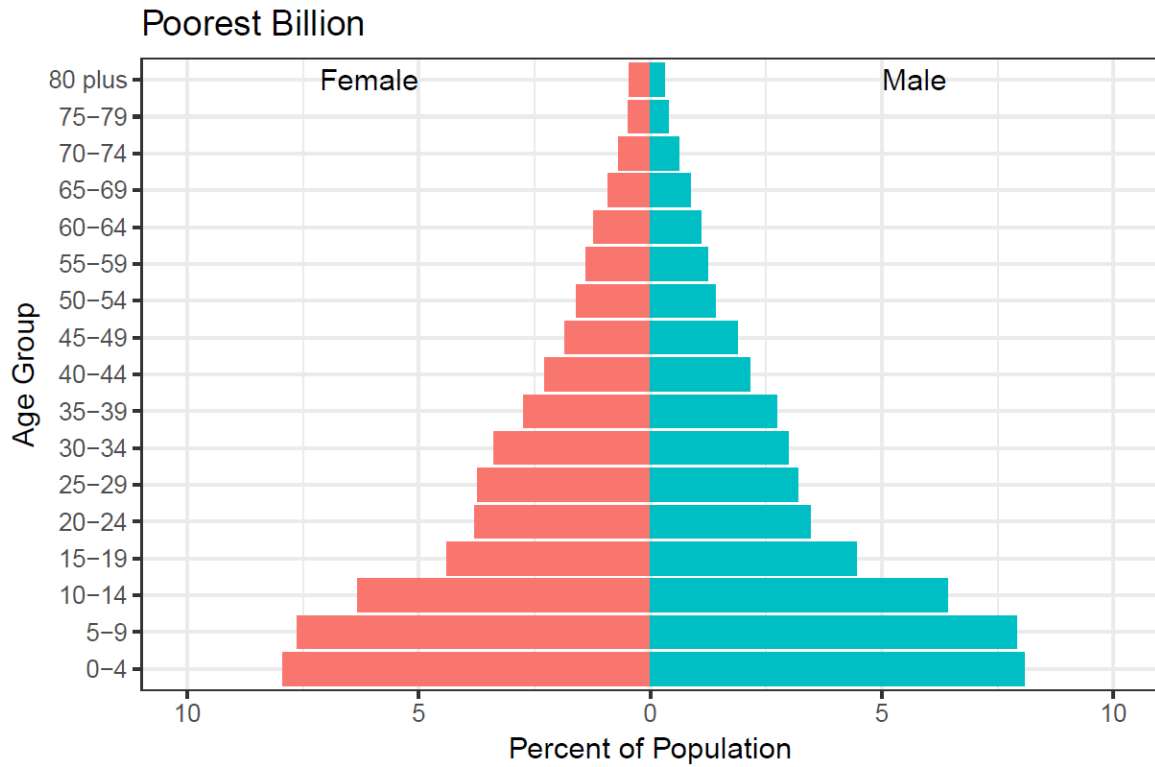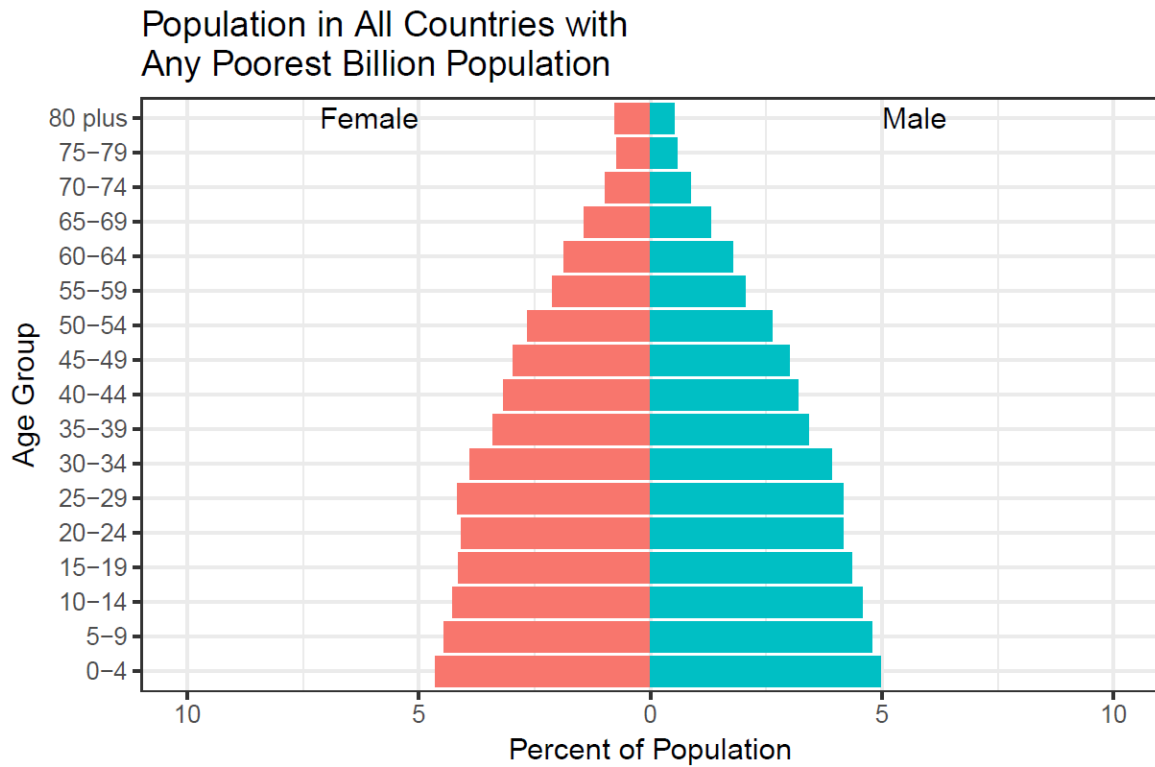

Poorest Billion, Low income

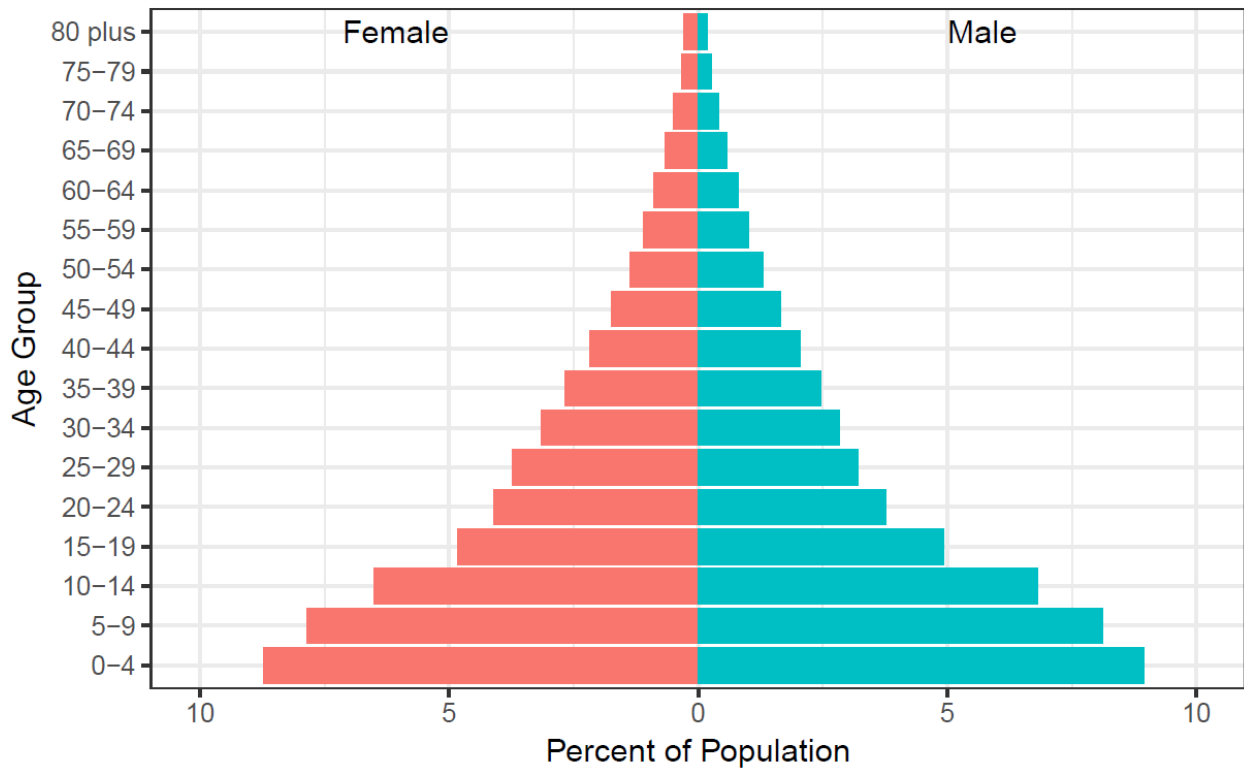

Low income

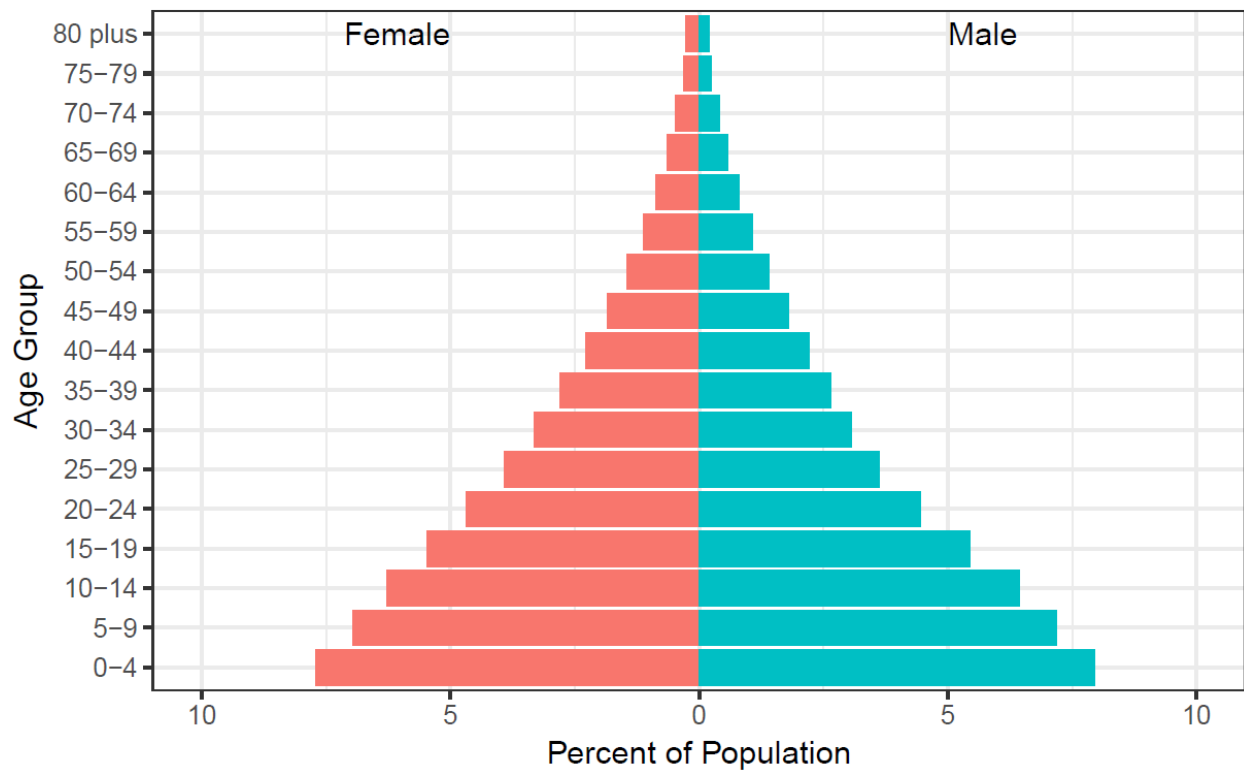

Poorest Billion, Lower middle income

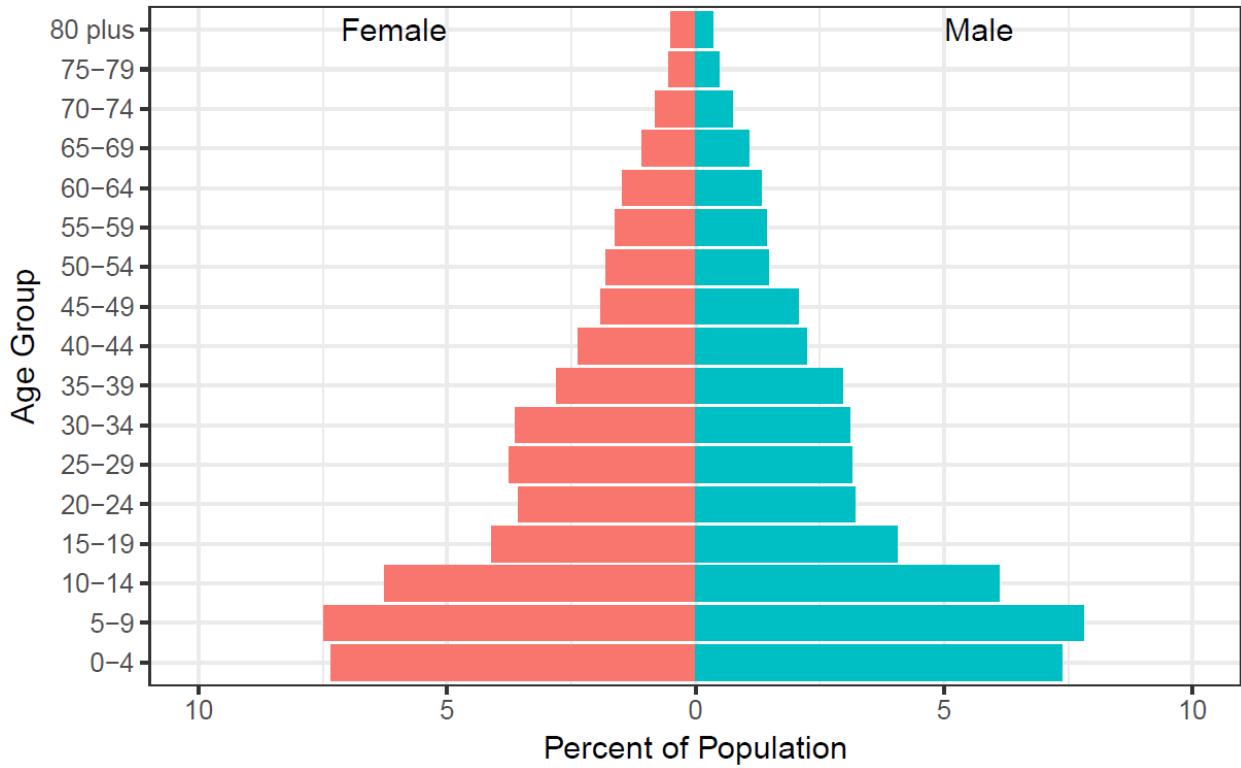

Lower middle income

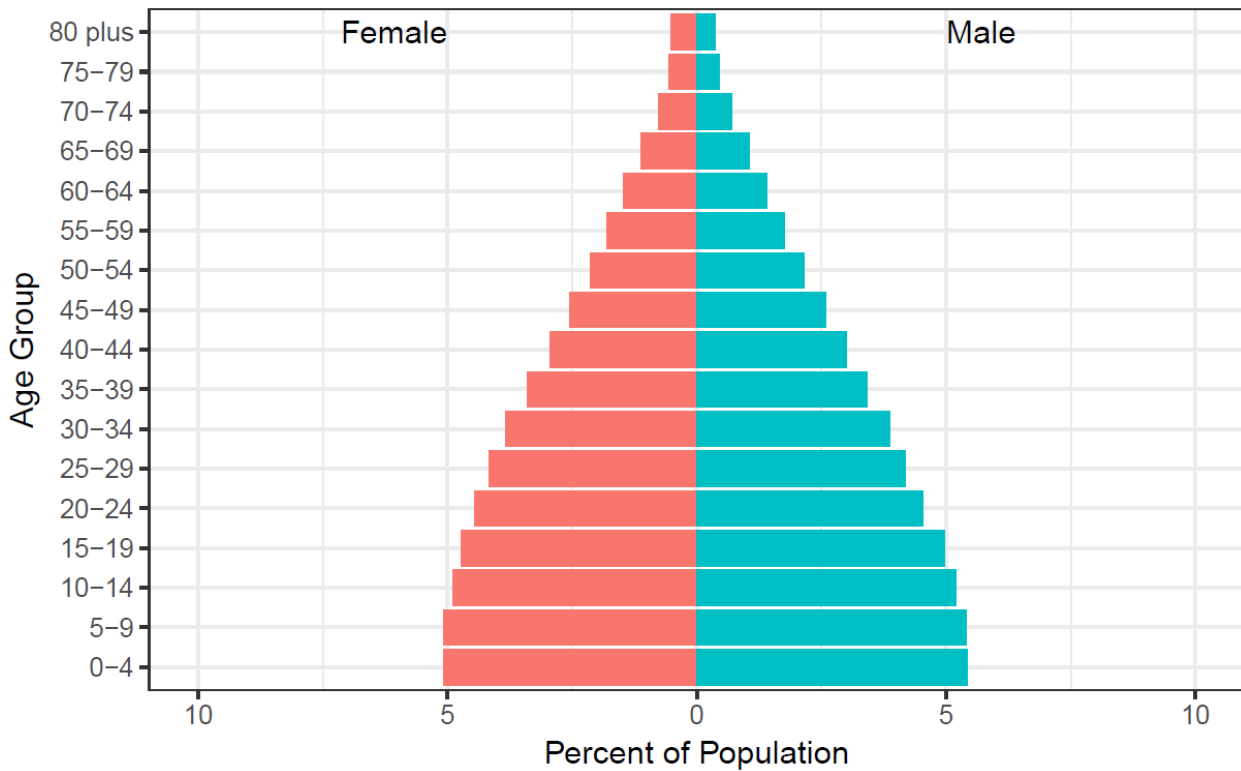

Poorest Billion, Upper middle income

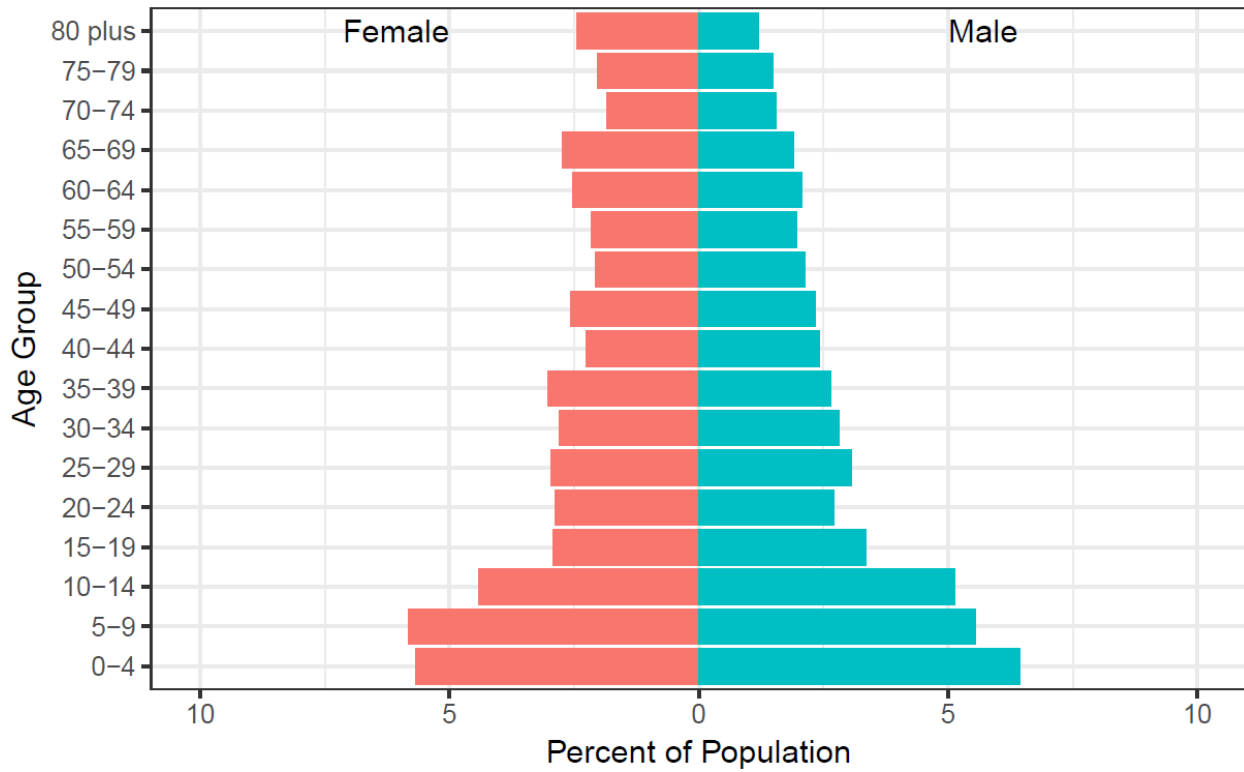

Upper middle income

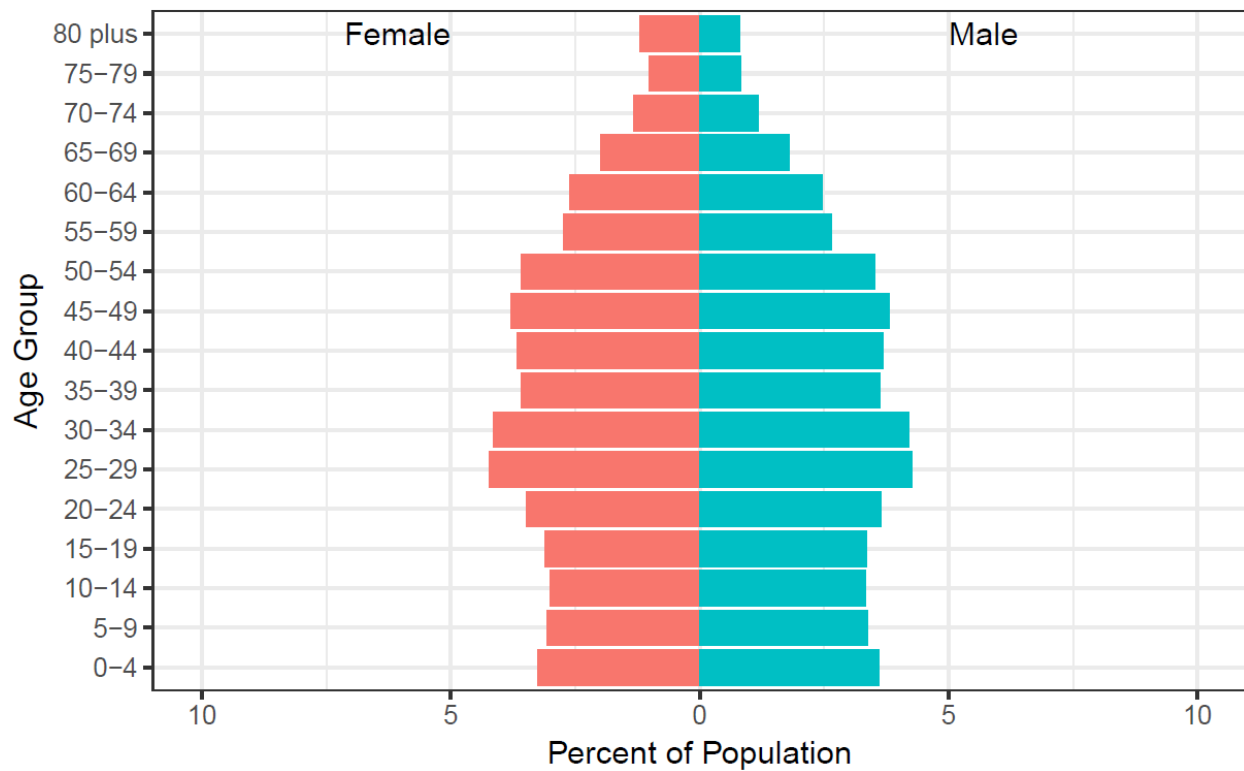

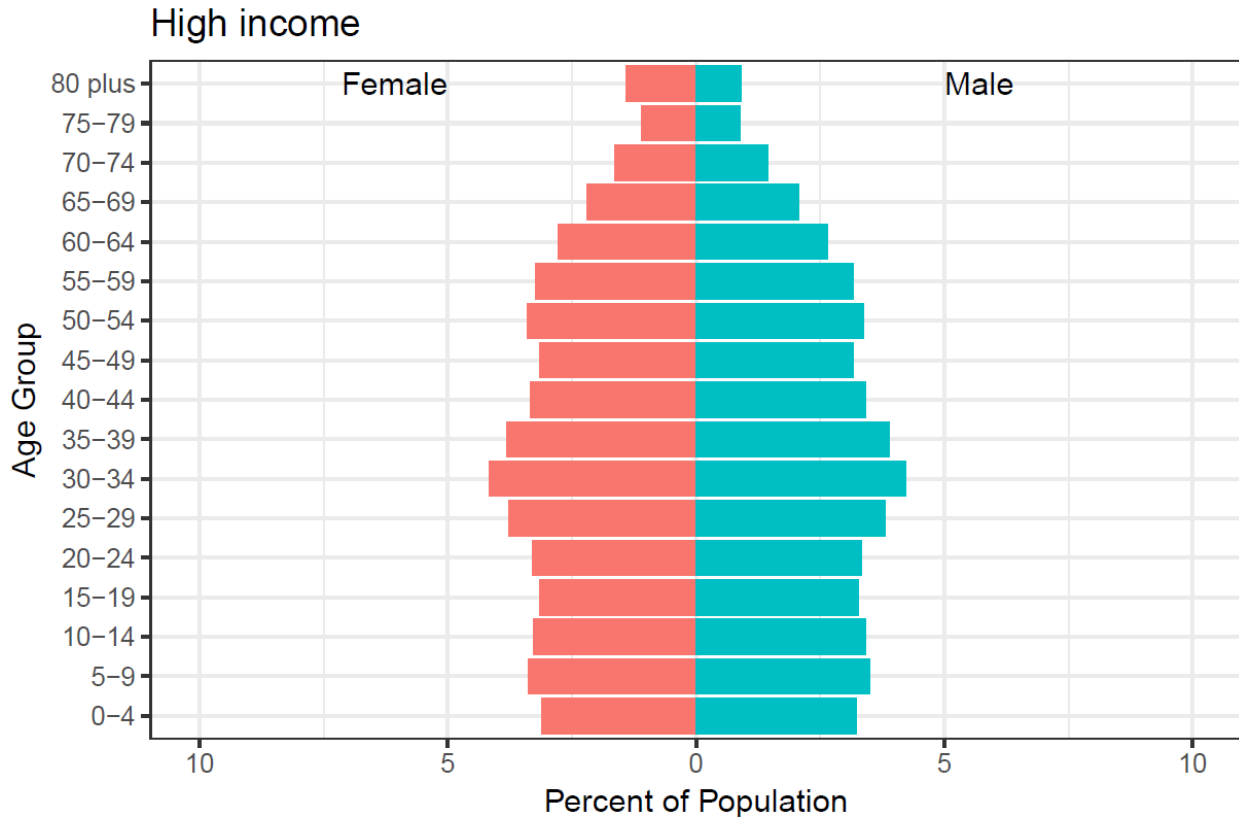

**Appendix Table 5. Percent of the population below specified ages in various groups**

|                                                      | Under 5 | Under 20 | Under 30 | Under 40 | Under 50 | Under 75 |
|------------------------------------------------------|---------|----------|----------|----------|----------|----------|
| <b>Poorest Billion</b>                               | 16.0    | 53.1     | 67.3     | 79.1     | 87.3     | 98.4     |
| <b>Countries with any Poorest Billion Population</b> | 9.6     | 36.2     | 52.8     | 67.4     | 79.7     | 97.4     |
| <b>Poorest Billion, Low income</b>                   | 17.7    | 56.7     | 71.5     | 82.7     | 90.3     | 98.9     |
| <b>Low income</b>                                    | 15.7    | 53.5     | 70.1     | 82.0     | 90.1     | 99.0     |
| <b>Poorest Billion, Lower middle income</b>          | 14.7    | 50.5     | 64.3     | 76.7     | 85.3     | 98.1     |
| <b>Lower middle income</b>                           | 10.5    | 40.8     | 58.1     | 72.7     | 83.8     | 98.1     |
| <b>Poorest Billion, Upper middle income</b>          | 12.1    | 39.3     | 50.9     | 62.3     | 71.9     | 92.8     |
| <b>Upper middle income</b>                           | 6.9     | 26.1     | 41.7     | 57.3     | 72.2     | 96.1     |
| <b>High income</b>                                   | 6.4     | 26.4     | 40.6     | 56.7     | 69.7     | 95.7     |



## Survey of Expert Perceptions Results

Our survey showed perceived differences in incidence between the poorest billion and non-poorest within LMICs in all 61 communicable, maternal, neonatal, and nutritional diseases (CMNNs), 39 of 143 NCDs, and 13 of 19 injuries (Fig 2). Most of these conditions with perceived differences between the poorest and non-poorest ( $p < 0.05$ ) were thought to occur more often in the poorest (104 of 113), although ischemic heart disease, type 2 diabetes, eating disorders, gout, and several substance use disorders were thought to occur more often among the non-poorest. Of the 164 conditions we included that can be fatal according to GBD, respondents perceived 153 to be more highly fatal among the poorest than the less poor; the others showed no difference.

Respondents generally expressed confidence in their answers. Over 80% of experts were confident or very confident of their answers about incidence for 71 conditions, while there were only six conditions for which over 50% of respondents were uncertain or very uncertain in their responses about incidence. The spread of responses showed a variety of certainty levels in the responses in aggregate. For incidence, there were 22 conditions (10%) for which respondents answered using only two categories, showing relative certainty, and 27 conditions (13%) for which respondents' answers spanned all five options from "Much Higher in the Non-Poorest" to "Much Higher in the Poorest," showing a higher degree of uncertainty across experts.

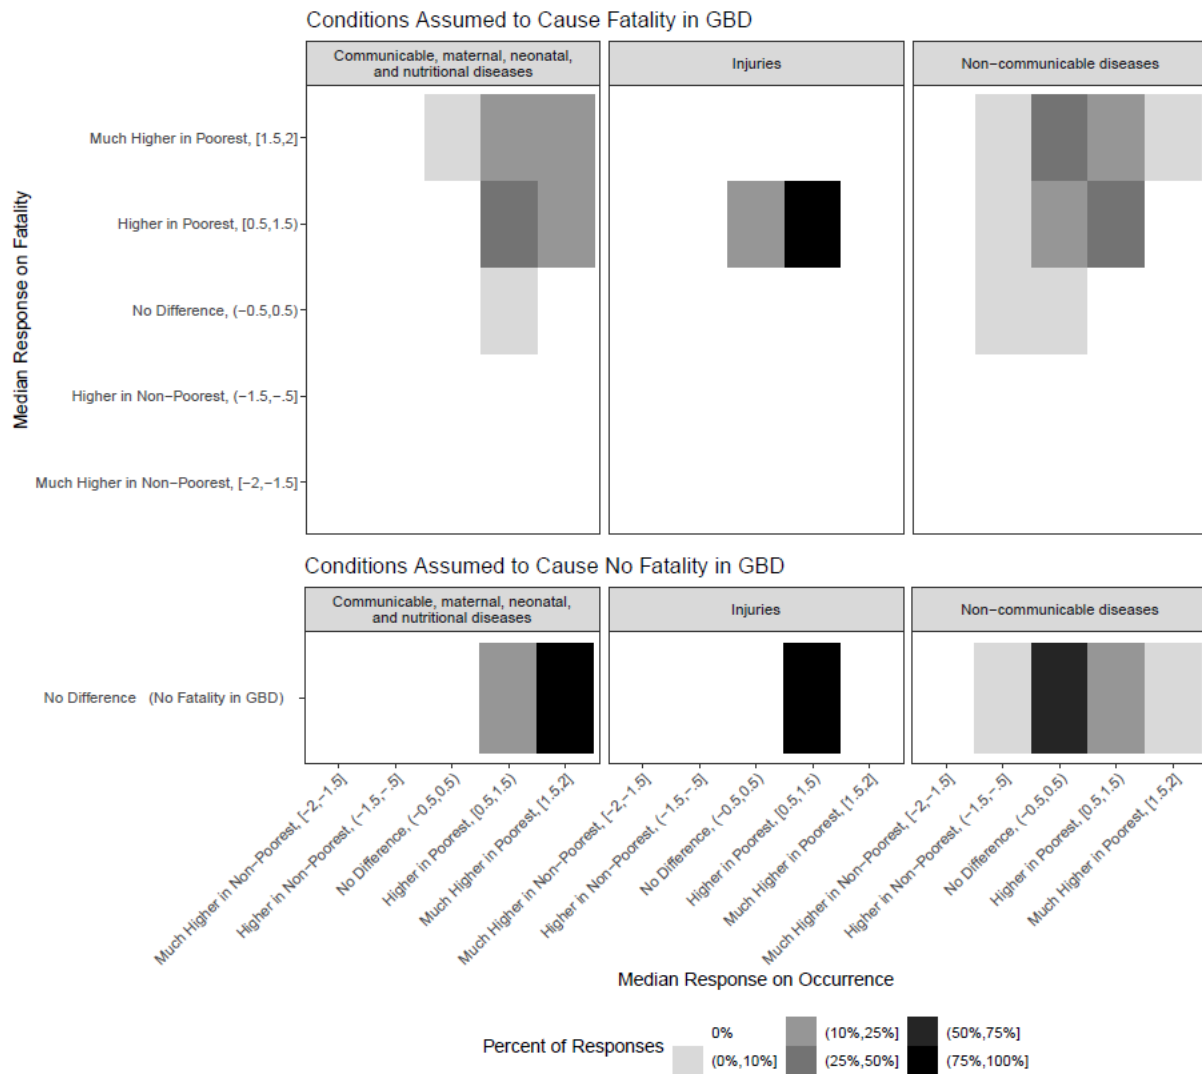

To plot spread, the axes are converted to a continuous -2 (Much Higher in the Non-Poorest) to 2 (Much Higher in the Poorest) scale to calculate medians. Percentages are shown within disease categories.

**Appendix Figure 2: Summary of expert perceptions of disease incidence and case fatality among the poorest billion compared to non-poorest in low- and middle-income countries, by disease groups**

For more disease-specific results, see table below or appendix in:

Bukhman G, Mocumbi AO, Atun R, Becker AE, Bhutta Z, Binagwaho A, et al. The Lancet NCDI Poverty Commission: bridging a gap in universal health coverage for the poorest billion. *The Lancet*. 2020;396: 991–1044. doi:10.1016/S0140-6736(20)31907-3

**Appendix Table 6. Summary results from expert survey on perceptions of disease occurrence and fatality**

-2 = Much Higher in the Non-Poorest, -1 = Higher in the Non-Poorest, 0 = No Difference, 1 = Higher in the Poorest, 2 = Much Higher in the Poorest

P-values based on sign test for the median being different than “No Difference between Poorest and Non-Poorest” (0)

| Condition                                                         | Measure    | Median | Min | Q1  | Q3   | Max | p-value | Number of Respondents |
|-------------------------------------------------------------------|------------|--------|-----|-----|------|-----|---------|-----------------------|
| <b>Communicable, maternal, neonatal, and nutritional diseases</b> |            |        |     |     |      |     |         |                       |
| Acute hepatitis A                                                 | fatality   | 1      | 0   | 1   | 1    | 2   | <0.001  | 33                    |
| Acute hepatitis A                                                 | occurrence | 1      | -1  | 1   | 2    | 2   | <0.001  | 33                    |
| Acute hepatitis E                                                 | fatality   | 1      | 0   | 1   | 2    | 2   | <0.001  | 19                    |
| Acute hepatitis E                                                 | occurrence | 1      | 0   | 1   | 2    | 2   | <0.001  | 20                    |
| African trypanosomiasis                                           | fatality   | 2      | 1   | 1   | 2    | 2   | <0.001  | 19                    |
| African trypanosomiasis                                           | occurrence | 2      | 0   | 1   | 2    | 2   | <0.001  | 20                    |
| Ascariasis                                                        | fatality   | 1      | 0   | 0   | 2    | 2   | 0.001   | 19                    |
| Ascariasis                                                        | occurrence | 2      | 1   | 1   | 2    | 2   | <0.001  | 20                    |
| Chagas disease                                                    | fatality   | 1      | 0   | 1   | 2    | 2   | <0.001  | 19                    |
| Chagas disease                                                    | occurrence | 1      | -2  | 1   | 2    | 2   | 0.001   | 20                    |
| Chlamydial infection                                              | fatality   | 0.5    | 0   | 0   | 1    | 2   | <0.001  | 42                    |
| Chlamydial infection                                              | occurrence | 1      | -1  | 1   | 1    | 2   | <0.001  | 42                    |
| Cutaneous and mucocutaneous leishmaniasis                         | occurrence | 2      | 1   | 1   | 2    | 2   | <0.001  | 19                    |
| Cystic echinococcosis                                             | fatality   | 1      | 0   | 1   | 1.5  | 2   | <0.001  | 19                    |
| Cystic echinococcosis                                             | occurrence | 1      | 0   | 1   | 2    | 2   | <0.001  | 20                    |
| Cysticercosis                                                     | fatality   | 1      | 0   | 1   | 2    | 2   | <0.001  | 20                    |
| Cysticercosis                                                     | occurrence | 1      | -2  | 1   | 2    | 2   | <0.001  | 21                    |
| Dengue                                                            | fatality   | 1      | 0   | 1   | 2    | 2   | <0.001  | 19                    |
| Dengue                                                            | occurrence | 1      | -1  | 1   | 2    | 2   | <0.001  | 20                    |
| Diarrheal diseases                                                | fatality   | 2      | 1   | 1.5 | 2    | 2   | <0.001  | 19                    |
| Diarrheal diseases                                                | occurrence | 2      | 1   | 2   | 2    | 2   | <0.001  | 20                    |
| Diphtheria                                                        | fatality   | 2      | 0   | 1   | 2    | 2   | <0.001  | 19                    |
| Diphtheria                                                        | occurrence | 2      | 0   | 1   | 2    | 2   | <0.001  | 20                    |
| Ebola                                                             | fatality   | 1.5    | 0   | 1   | 2    | 2   | <0.001  | 20                    |
| Ebola                                                             | occurrence | 2      | 0   | 1   | 2    | 2   | <0.001  | 21                    |
| Encephalitis                                                      | fatality   | 1      | 0   | 1   | 2    | 2   | <0.001  | 19                    |
| Encephalitis                                                      | occurrence | 1      | 0   | 1   | 1.25 | 2   | <0.001  | 20                    |
| Food-borne trematodiasis                                          | occurrence | 2      | 1   | 1   | 2    | 2   | <0.001  | 20                    |
| Genital herpes                                                    | fatality   | 0      | 0   | 0   | 1    | 2   | <0.001  | 42                    |
| Genital herpes                                                    | occurrence | 1      | -1  | 0   | 1    | 2   | <0.001  | 43                    |
| Gonococcal infection                                              | fatality   | 1      | 0   | 0   | 1.75 | 2   | <0.001  | 42                    |
| Gonococcal infection                                              | occurrence | 1      | -1  | 1   | 1    | 2   | <0.001  | 43                    |
| Hemolytic disease and other neonatal jaundice                     | fatality   | 2      | 0   | 1   | 2    | 2   | 0.001   | 15                    |
| Hemolytic disease and other neonatal jaundice                     | occurrence | 0      | 0   | 0   | 1    | 2   | 0.015   | 15                    |

|                                                          |            |     |    |      |   |   |        |    |
|----------------------------------------------------------|------------|-----|----|------|---|---|--------|----|
| Hepatitis B                                              | fatality   | 1   | 0  | 1    | 2 | 2 | <0.001 | 19 |
| Hepatitis B                                              | occurrence | 1   | -1 | 0.5  | 1 | 2 | 0.003  | 19 |
| Hepatitis C                                              | fatality   | 1   | 0  | 1    | 2 | 2 | <0.001 | 19 |
| Hepatitis C                                              | occurrence | 1   | -1 | 0    | 1 | 2 | 0.003  | 20 |
| HIV/AIDS - Tuberculosis                                  | fatality   | 2   | 0  | 1    | 2 | 2 | <0.001 | 33 |
| HIV/AIDS - Tuberculosis                                  | occurrence | 1.5 | 0  | 1    | 2 | 2 | <0.001 | 34 |
| HIV/AIDS resulting in other diseases                     | fatality   | 2   | -1 | 1    | 2 | 2 | <0.001 | 33 |
| HIV/AIDS resulting in other diseases                     | occurrence | 1   | -2 | 1    | 2 | 2 | <0.001 | 34 |
| Hookworm disease                                         | occurrence | 2   | 1  | 1    | 2 | 2 | <0.001 | 20 |
| Indirect maternal deaths                                 | occurrence | 2   | 0  | 1    | 2 | 2 | 0.001  | 15 |
| Iodine deficiency                                        | fatality   | 1   | 0  | 1    | 2 | 2 | 0.007  | 11 |
| Iodine deficiency                                        | occurrence | 2   | 0  | 1    | 2 | 2 | 0.005  | 11 |
| Iron-deficiency anemia                                   | fatality   | 2   | 1  | 1    | 2 | 2 | 0.003  | 11 |
| Iron-deficiency anemia                                   | occurrence | 2   | 1  | 1.5  | 2 | 2 | 0.002  | 11 |
| Late maternal deaths                                     | occurrence | 2   | 0  | 1    | 2 | 2 | <0.001 | 15 |
| Leprosy                                                  | occurrence | 2   | 0  | 1    | 2 | 2 | <0.001 | 22 |
| Lower respiratory infections                             | fatality   | 2   | 0  | 1    | 2 | 2 | <0.001 | 19 |
| Lower respiratory infections                             | occurrence | 1   | -1 | 1    | 2 | 2 | <0.001 | 20 |
| Lymphatic filariasis                                     | occurrence | 2   | -1 | 1    | 2 | 2 | <0.001 | 20 |
| Malaria                                                  | fatality   | 2   | 1  | 1    | 2 | 2 | <0.001 | 21 |
| Malaria                                                  | occurrence | 1   | 1  | 1    | 2 | 2 | <0.001 | 22 |
| Maternal abortion, miscarriage, and ectopic pregnancy    | fatality   | 2   | 1  | 1    | 2 | 2 | 0.003  | 11 |
| Maternal abortion, miscarriage, and ectopic pregnancy    | occurrence | 1   | 0  | 0.5  | 1 | 2 | 0.008  | 11 |
| Maternal deaths aggravated by HIV/AIDS                   | occurrence | 1   | -1 | 1    | 2 | 2 | <0.001 | 17 |
| Maternal hemorrhage                                      | fatality   | 2   | 1  | 1    | 2 | 2 | 0.002  | 12 |
| Maternal hemorrhage                                      | occurrence | 1   | 0  | 1    | 1 | 2 | 0.003  | 12 |
| Maternal hypertensive disorders                          | fatality   | 1   | 1  | 1    | 2 | 2 | 0.002  | 12 |
| Maternal hypertensive disorders                          | occurrence | 1   | -1 | 0    | 1 | 1 | 0.023  | 12 |
| Maternal obstructed labor and uterine rupture            | fatality   | 2   | 1  | 1.5  | 2 | 2 | 0.002  | 11 |
| Maternal obstructed labor and uterine rupture            | occurrence | 2   | 1  | 1    | 2 | 2 | 0.003  | 11 |
| Maternal sepsis and other maternal infections            | fatality   | 2   | 1  | 1    | 2 | 2 | 0.002  | 12 |
| Maternal sepsis and other maternal infections            | occurrence | 1   | 1  | 1    | 2 | 2 | 0.002  | 12 |
| Measles                                                  | fatality   | 1.5 | 1  | 1    | 2 | 2 | <0.001 | 20 |
| Measles                                                  | occurrence | 2   | 0  | 1    | 2 | 2 | <0.001 | 21 |
| Meningitis                                               | fatality   | 1.5 | 1  | 1    | 2 | 2 | <0.001 | 20 |
| Meningitis                                               | occurrence | 1   | 0  | 1    | 2 | 2 | <0.001 | 21 |
| Neonatal encephalopathy due to birth asphyxia and trauma | fatality   | 2   | 0  | 2    | 2 | 2 | <0.001 | 17 |
| Neonatal encephalopathy due to birth asphyxia and trauma | occurrence | 1   | -1 | 1    | 2 | 2 | 0.001  | 17 |
| Neonatal preterm birth complications                     | fatality   | 2   | 1  | 1.75 | 2 | 2 | <0.001 | 16 |
| Neonatal preterm birth complications                     | occurrence | 1   | -1 | 1    | 2 | 2 | 0.001  | 16 |

|                                               |            |     |    |       |      |   |        |    |
|-----------------------------------------------|------------|-----|----|-------|------|---|--------|----|
| Neonatal sepsis and other neonatal infections | fatality   | 2   | 1  | 1     | 2    | 2 | <0.001 | 16 |
| Neonatal sepsis and other neonatal infections | occurrence | 1   | -1 | 1     | 2    | 2 | <0.001 | 16 |
| Onchocerciasis                                | occurrence | 2   | 0  | 1     | 2    | 2 | <0.001 | 21 |
| Otitis media                                  | fatality   | 1   | 0  | 0     | 1.5  | 2 | 0.002  | 19 |
| Otitis media                                  | occurrence | 1   | 0  | 1     | 2    | 2 | <0.001 | 20 |
| Paratyphoid fever                             | fatality   | 1   | 0  | 1     | 2    | 2 | <0.001 | 19 |
| Paratyphoid fever                             | occurrence | 1   | 0  | 1     | 2    | 2 | <0.001 | 19 |
| Protein-energy malnutrition                   | fatality   | 2   | 1  | 2     | 2    | 2 | <0.001 | 15 |
| Protein-energy malnutrition                   | occurrence | 2   | 1  | 2     | 2    | 2 | <0.001 | 15 |
| Rabies                                        | fatality   | 1   | 0  | 0.5   | 2    | 2 | <0.001 | 19 |
| Rabies                                        | occurrence | 1   | 0  | 1     | 2    | 2 | <0.001 | 20 |
| Schistosomiasis                               | fatality   | 1   | 0  | 1     | 2    | 2 | <0.001 | 20 |
| Schistosomiasis                               | occurrence | 2   | 1  | 1     | 2    | 2 | <0.001 | 21 |
| Syphilis                                      | fatality   | 1   | 0  | 1     | 2    | 2 | <0.001 | 42 |
| Syphilis                                      | occurrence | 1   | -2 | 1     | 2    | 2 | <0.001 | 43 |
| Tetanus                                       | fatality   | 1   | 0  | 1     | 2    | 2 | <0.001 | 19 |
| Tetanus                                       | occurrence | 2   | 1  | 1     | 2    | 2 | <0.001 | 20 |
| Trachoma                                      | occurrence | 2   | 0  | 2     | 2    | 2 | <0.001 | 21 |
| Trichomoniasis                                | occurrence | 1   | -2 | 1     | 1    | 2 | <0.001 | 43 |
| Trichuriasis                                  | occurrence | 2   | 0  | 1     | 2    | 2 | <0.001 | 19 |
| Tuberculosis                                  | fatality   | 2   | 1  | 1.75  | 2    | 2 | <0.001 | 40 |
| Tuberculosis                                  | occurrence | 2   | 1  | 1.75  | 2    | 2 | <0.001 | 40 |
| Typhoid fever                                 | fatality   | 2   | 0  | 1     | 2    | 2 | <0.001 | 19 |
| Typhoid fever                                 | occurrence | 2   | 0  | 1     | 2    | 2 | <0.001 | 20 |
| Upper respiratory infections                  | fatality   | 1   | 0  | 1     | 2    | 2 | <0.001 | 19 |
| Upper respiratory infections                  | occurrence | 1   | 0  | 0     | 1.25 | 2 | 0.002  | 20 |
| Varicella and herpes zoster                   | fatality   | 1   | 0  | 1     | 1    | 2 | <0.001 | 19 |
| Varicella and herpes zoster                   | occurrence | 1   | 0  | 0.75  | 2    | 2 | <0.001 | 20 |
| Visceral leishmaniasis                        | fatality   | 1   | 0  | 1     | 2    | 2 | <0.001 | 18 |
| Visceral leishmaniasis                        | occurrence | 2   | 0  | 1     | 2    | 2 | <0.001 | 19 |
| Vitamin A deficiency                          | occurrence | 2   | 1  | 2     | 2    | 2 | <0.001 | 14 |
| Whooping cough                                | fatality   | 1   | 0  | 1     | 1.5  | 2 | <0.001 | 19 |
| Whooping cough                                | occurrence | 1   | 0  | 1     | 2    | 2 | <0.001 | 20 |
| Yellow fever                                  | fatality   | 1   | 0  | 1     | 2    | 2 | <0.001 | 18 |
| Yellow fever                                  | occurrence | 1   | -1 | 1     | 2    | 2 | <0.001 | 20 |
| <b>Injuries</b>                               |            |     |    |       |      |   |        |    |
| Adverse effects of medical treatment          | fatality   | 1   | -1 | 1     | 2    | 2 | 0.002  | 18 |
| Adverse effects of medical treatment          | occurrence | 1   | -1 | -0.25 | 1    | 2 | 0.078  | 20 |
| Assault by firearm                            | fatality   | 1   | -1 | 1     | 2    | 2 | <0.001 | 19 |
| Assault by firearm                            | occurrence | 0.5 | -1 | -0.25 | 1    | 2 | 0.132  | 20 |
| Assault by other means                        | fatality   | 1   | -1 | 1     | 2    | 2 | <0.001 | 19 |
| Assault by other means                        | occurrence | 1   | -1 | 0     | 1    | 2 | 0.005  | 20 |

|                                                 |            |   |    |       |      |   |        |    |
|-------------------------------------------------|------------|---|----|-------|------|---|--------|----|
| Assault by sharp object                         | fatality   | 1 | -1 | 1     | 2    | 2 | <0.001 | 19 |
| Assault by sharp object                         | occurrence | 1 | -1 | 0     | 1    | 2 | 0.003  | 20 |
| Collective violence and legal intervention      | fatality   | 1 | -1 | 1     | 1.75 | 2 | <0.001 | 18 |
| Collective violence and legal intervention      | occurrence | 1 | -1 | 1     | 2    | 2 | <0.001 | 19 |
| Drowning                                        | fatality   | 1 | 0  | 1     | 1    | 2 | <0.001 | 18 |
| Drowning                                        | occurrence | 1 | 0  | 1     | 2    | 2 | <0.001 | 20 |
| Environmental heat and cold exposure            | fatality   | 1 | -1 | 1     | 1.75 | 2 | <0.001 | 18 |
| Environmental heat and cold exposure            | occurrence | 1 | 0  | 1     | 2    | 2 | <0.001 | 20 |
| Exposure to forces of nature                    | fatality   | 1 | -1 | 1     | 2    | 2 | <0.001 | 18 |
| Exposure to forces of nature                    | occurrence | 1 | -1 | 0.75  | 2    | 2 | <0.001 | 20 |
| Falls                                           | fatality   | 1 | -1 | 0.25  | 1.75 | 2 | 0.002  | 18 |
| Falls                                           | occurrence | 1 | 0  | 0     | 1    | 2 | 0.002  | 20 |
| Fire, heat, and hot substances                  | fatality   | 1 | -1 | 1     | 2    | 2 | <0.001 | 18 |
| Fire, heat, and hot substances                  | occurrence | 1 | -2 | 1     | 2    | 2 | 0.001  | 20 |
| Foreign body in eyes                            | occurrence | 1 | 0  | 0     | 1    | 2 | 0.002  | 20 |
| Non-venomous animal contact                     | fatality   | 1 | -1 | 0     | 2    | 2 | 0.003  | 17 |
| Non-venomous animal contact                     | occurrence | 1 | -1 | 1     | 1    | 2 | <0.001 | 19 |
| Poisonings                                      | fatality   | 1 | -1 | 1     | 2    | 2 | <0.001 | 18 |
| Poisonings                                      | occurrence | 1 | 0  | 0     | 1.25 | 2 | <0.001 | 20 |
| Pulmonary aspiration and foreign body in airway | fatality   | 1 | -1 | 1     | 1    | 2 | 0.001  | 17 |
| Pulmonary aspiration and foreign body in airway | occurrence | 0 | 0  | 0     | 0.5  | 2 | 0.053  | 19 |
| Road injuries                                   | fatality   | 1 | -2 | 1     | 2    | 2 | 0.005  | 19 |
| Road injuries                                   | occurrence | 1 | -2 | -1    | 1    | 2 | 0.253  | 21 |
| Self-harm                                       | fatality   | 1 | -1 | 0     | 1    | 2 | 0.009  | 17 |
| Self-harm                                       | occurrence | 0 | -2 | -1    | 0    | 1 | 0.308  | 19 |
| Unintentional firearm injuries                  | fatality   | 1 | -1 | 1     | 2    | 2 | 0.001  | 17 |
| Unintentional firearm injuries                  | occurrence | 1 | -2 | -1    | 1    | 2 | 0.607  | 20 |
| Unintentional suffocation                       | fatality   | 1 | -1 | 0     | 1    | 2 | 0.004  | 17 |
| Unintentional suffocation                       | occurrence | 1 | -1 | 0     | 1    | 2 | 0.023  | 19 |
| Venomous animal contact                         | fatality   | 1 | 0  | 1     | 2    | 2 | 0.001  | 16 |
| Venomous animal contact                         | occurrence | 1 | 0  | 0.5   | 1    | 2 | <0.001 | 19 |
| <b>Non-communicable diseases</b>                |            |   |    |       |      |   |        |    |
| Acne vulgaris                                   | occurrence | 0 | -1 | 0     | 0    | 1 | 1      | 8  |
| Acute glomerulonephritis                        | fatality   | 1 | 0  | 1     | 1.5  | 2 | 0.001  | 15 |
| Acute glomerulonephritis                        | occurrence | 0 | -1 | 0     | 1    | 2 | 0.071  | 15 |
| Acute lymphoid leukemia                         | fatality   | 2 | 0  | 1     | 2    | 2 | <0.001 | 24 |
| Acute lymphoid leukemia                         | occurrence | 0 | -1 | 0     | 0    | 2 | 1      | 25 |
| Acute myeloid leukemia                          | fatality   | 2 | 0  | 1     | 2    | 2 | <0.001 | 24 |
| Acute myeloid leukemia                          | occurrence | 0 | -1 | -0.25 | 0    | 2 | 0.608  | 24 |
| Alcohol use disorders                           | fatality   | 1 | -1 | 0     | 1    | 2 | 0.012  | 17 |
| Alcohol use disorders                           | occurrence | 1 | -2 | 0     | 1    | 2 | 0.158  | 17 |

|                                                         |            |      |    |       |      |   |        |    |
|---------------------------------------------------------|------------|------|----|-------|------|---|--------|----|
| Alopecia areata                                         | occurrence | 0    | -1 | -0.5  | 0.5  | 1 | 1      | 7  |
| Alzheimer disease and other dementias                   | fatality   | 1    | -1 | 1     | 1    | 2 | 0.015  | 10 |
| Alzheimer disease and other dementias                   | occurrence | -0.5 | -2 | -1    | 0    | 1 | 0.12   | 10 |
| Amphetamine use disorders                               | fatality   | 0    | -1 | 0     | 1    | 2 | 0.158  | 14 |
| Amphetamine use disorders                               | occurrence | -1   | -2 | -1    | -1   | 1 | 0.008  | 15 |
| Anorexia nervosa                                        | fatality   | 0    | -1 | -0.75 | 0.75 | 2 | 0.821  | 14 |
| Anorexia nervosa                                        | occurrence | -1   | -2 | -2    | -1   | 0 | 0.002  | 14 |
| Anxiety disorders                                       | occurrence | 0    | -2 | -1.25 | 1    | 2 | 0.774  | 16 |
| Aortic aneurysm                                         | occurrence | 0    | -2 | -1    | 0.75 | 1 | 0.419  | 30 |
| Appendicitis                                            | fatality   | 2    | 1  | 1     | 2    | 2 | 0.012  | 8  |
| Appendicitis                                            | occurrence | 0    | 0  | 0     | 0    | 2 | 1      | 9  |
| Asbestosis                                              | fatality   | 1    | 0  | 1     | 2    | 2 | 0.001  | 16 |
| Asbestosis                                              | occurrence | 1    | -2 | 0     | 1    | 2 | 0.071  | 16 |
| Asperger syndrome and other autistic spectrum disorders | occurrence | 0    | -1 | 0     | 0    | 2 | 0.824  | 13 |
| Asthma                                                  | fatality   | 1    | 0  | 1     | 2    | 2 | <0.001 | 18 |
| Asthma                                                  | occurrence | 0.5  | -2 | 0     | 1    | 1 | 0.212  | 18 |
| Atrial fibrillation and flutter                         | fatality   | 2    | 0  | 1     | 2    | 2 | <0.001 | 29 |
| Atrial fibrillation and flutter                         | occurrence | 0    | -2 | -1    | 1    | 2 | 0.712  | 29 |
| Attention-deficit/hyperactivity disorder                | occurrence | 0    | -2 | -1    | 0    | 1 | 0.152  | 14 |
| Autism                                                  | occurrence | 0    | -2 | 0     | 0    | 2 | 1      | 14 |
| Benign prostatic hyperplasia                            | occurrence | 0    | -1 | 0     | 0    | 1 | 0.773  | 11 |
| Bipolar disorder                                        | occurrence | 0    | -1 | 0     | 0.75 | 2 | 0.374  | 14 |
| Bladder cancer                                          | fatality   | 2    | 0  | 1     | 2    | 2 | <0.001 | 21 |
| Bladder cancer                                          | occurrence | 0    | -1 | 0     | 1    | 1 | 0.039  | 22 |
| Brain and nervous system cancer                         | fatality   | 2    | -1 | 1     | 2    | 2 | <0.001 | 26 |
| Brain and nervous system cancer                         | occurrence | 0    | -2 | 0     | 0    | 1 | 0.374  | 27 |
| Breast cancer                                           | fatality   | 2    | 1  | 1     | 2    | 2 | <0.001 | 20 |
| Breast cancer                                           | occurrence | 0    | -1 | -1    | 0    | 1 | 0.802  | 21 |
| Bulimia nervosa                                         | fatality   | 0    | -1 | -1    | 0    | 2 | 0.821  | 14 |
| Bulimia nervosa                                         | occurrence | -1   | -2 | -2    | -1   | 0 | 0.002  | 14 |
| Cannabis use disorders                                  | occurrence | -1   | -2 | -1    | 0.75 | 2 | 0.549  | 18 |
| Cardiomyopathy and myocarditis                          | fatality   | 2    | 1  | 1     | 2    | 2 | <0.001 | 28 |
| Cardiomyopathy and myocarditis                          | occurrence | 1    | -1 | 0     | 1    | 2 | 0.003  | 28 |
| Cataract                                                | occurrence | 1.5  | 0  | 1     | 2    | 2 | 0.053  | 6  |
| Cellulitis                                              | fatality   | 1    | 0  | 1     | 1    | 2 | 0.026  | 7  |
| Cellulitis                                              | occurrence | 1    | 0  | 0     | 1    | 1 | 0.072  | 7  |
| Cervical cancer                                         | fatality   | 2    | 1  | 1     | 2    | 2 | <0.001 | 24 |
| Cervical cancer                                         | occurrence | 1    | 0  | 1     | 2    | 2 | <0.001 | 25 |
| Chronic kidney disease due to diabetes mellitus         | fatality   | 1    | 1  | 1     | 2    | 2 | <0.001 | 16 |
| Chronic kidney disease due to diabetes mellitus         | occurrence | 1    | -1 | 1     | 1.25 | 2 | 0.005  | 16 |
| Chronic kidney disease due to glomerulonephritis        | fatality   | 1    | 0  | 1     | 2    | 2 | 0.001  | 15 |

|                                                                |            |     |    |       |      |   |        |    |
|----------------------------------------------------------------|------------|-----|----|-------|------|---|--------|----|
| Chronic kidney disease due to glomerulonephritis               | occurrence | 1   | 0  | 0     | 1    | 1 | 0.002  | 15 |
| Chronic kidney disease due to hypertension                     | fatality   | 1   | 0  | 1     | 2    | 2 | <0.001 | 17 |
| Chronic kidney disease due to hypertension                     | occurrence | 1   | -1 | 1     | 1    | 2 | 0.003  | 17 |
| Chronic kidney disease due to other causes                     | fatality   | 1   | 0  | 1     | 1.25 | 2 | 0.001  | 16 |
| Chronic kidney disease due to other causes                     | occurrence | 0.5 | -1 | 0     | 1    | 2 | 0.025  | 16 |
| Chronic lymphoid leukemia                                      | fatality   | 1.5 | 0  | 1     | 2    | 2 | <0.001 | 24 |
| Chronic lymphoid leukemia                                      | occurrence | 0   | -1 | -1    | 0    | 1 | 0.066  | 25 |
| Chronic myeloid leukemia                                       | fatality   | 1.5 | 0  | 1     | 2    | 2 | <0.001 | 24 |
| Chronic myeloid leukemia                                       | occurrence | 0   | -1 | -1    | 0    | 2 | 0.308  | 25 |
| Chronic obstructive pulmonary disease                          | fatality   | 1   | 0  | 1     | 2    | 2 | <0.001 | 16 |
| Chronic obstructive pulmonary disease                          | occurrence | 1   | -2 | 0     | 1    | 2 | 0.061  | 16 |
| Cirrhosis and other chronic liver diseases due to alcohol use  | fatality   | 1.5 | 1  | 1     | 2    | 2 | 0.005  | 10 |
| Cirrhosis and other chronic liver diseases due to alcohol use  | occurrence | 1   | 0  | 0.25  | 1    | 2 | 0.018  | 10 |
| Cirrhosis and other chronic liver diseases due to hepatitis B  | fatality   | 2   | 1  | 1     | 2    | 2 | 0.007  | 9  |
| Cirrhosis and other chronic liver diseases due to hepatitis B  | occurrence | 1   | 0  | 1     | 2    | 2 | 0.012  | 9  |
| Cirrhosis and other chronic liver diseases due to hepatitis C  | fatality   | 1.5 | 0  | 1     | 2    | 2 | 0.007  | 10 |
| Cirrhosis and other chronic liver diseases due to hepatitis C  | occurrence | 1   | 0  | 0.25  | 1.75 | 2 | 0.019  | 10 |
| Cirrhosis and other chronic liver diseases due to other causes | fatality   | 1   | 0  | 1     | 2    | 2 | 0.012  | 9  |
| Cirrhosis and other chronic liver diseases due to other causes | occurrence | 0   | -1 | 0     | 1    | 2 | 0.572  | 9  |
| Cleft lip and cleft palate                                     | fatality   | 1   | 1  | 1     | 1.5  | 2 | 0.018  | 7  |
| Cleft lip and cleft palate                                     | occurrence | 1   | 0  | 0     | 1    | 2 | 0.089  | 7  |
| Coal workers pneumoconiosis                                    | fatality   | 1   | 1  | 1     | 2    | 2 | <0.001 | 15 |
| Coal workers pneumoconiosis                                    | occurrence | 1   | 0  | 1     | 1.5  | 2 | 0.001  | 15 |
| Cocaine use disorders                                          | fatality   | 0   | -1 | -0.75 | 1    | 2 | 0.437  | 14 |
| Cocaine use disorders                                          | occurrence | -1  | -2 | -1    | 1    | 1 | 0.143  | 14 |
| Colon and rectum cancer                                        | fatality   | 2   | 1  | 1     | 2    | 2 | <0.001 | 26 |
| Colon and rectum cancer                                        | occurrence | 0   | -2 | -1    | 0    | 1 | 0.065  | 27 |
| Conduct disorder                                               | occurrence | 0   | -1 | 0     | 1    | 2 | 0.124  | 14 |
| Congenital heart anomalies                                     | fatality   | 2   | 1  | 2     | 2    | 2 | <0.001 | 27 |
| Congenital heart anomalies                                     | occurrence | 0   | -1 | 0     | 0.5  | 2 | 0.042  | 27 |
| Deciduous caries                                               | occurrence | 1   | -2 | 0     | 1    | 2 | 0.71   | 5  |
| Decubitus ulcer                                                | fatality   | 1   | 1  | 1     | 1.5  | 2 | 0.018  | 7  |
| Decubitus ulcer                                                | occurrence | 1   | -2 | 0.5   | 1    | 2 | 0.33   | 7  |
| Dermatitis                                                     | occurrence | 1   | -1 | 0     | 1    | 2 | 0.24   | 7  |
| Down syndrome                                                  | fatality   | 2   | 0  | 2     | 2    | 2 | 0.008  | 9  |
| Down syndrome                                                  | occurrence | 0   | -1 | 0     | 0.75 | 1 | 0.766  | 10 |
| Dysthymia                                                      | occurrence | 0   | -1 | 0     | 1    | 2 | 0.105  | 13 |
| Edentulism and severe tooth loss                               | occurrence | 2   | 1  | 2     | 2    | 2 | 0.048  | 5  |
| Endocarditis                                                   | fatality   | 2   | 1  | 1     | 2    | 2 | <0.001 | 29 |



|                                                     |            |      |    |       |      |   |        |    |
|-----------------------------------------------------|------------|------|----|-------|------|---|--------|----|
| Endocarditis                                        | occurrence | 1    | -2 | 0     | 1    | 2 | <0.001 | 29 |
| Endometriosis                                       | fatality   | 0    | 0  | 0     | 0.25 | 1 | 0.346  | 8  |
| Endometriosis                                       | occurrence | 0    | -1 | 0     | 0    | 0 | 1      | 8  |
| Epilepsy                                            | fatality   | 1    | 1  | 1     | 2    | 2 | 0.007  | 9  |
| Epilepsy                                            | occurrence | 1    | 1  | 1     | 1    | 2 | 0.005  | 9  |
| Esophageal cancer                                   | fatality   | 2    | 0  | 1     | 2    | 2 | <0.001 | 26 |
| Esophageal cancer                                   | occurrence | 1    | -1 | 0     | 1    | 2 | 0.001  | 27 |
| Female infertility                                  | occurrence | 1    | -1 | 0     | 1    | 1 | 0.299  | 9  |
| Fungal skin diseases                                | occurrence | 1    | 1  | 1     | 1.5  | 2 | 0.018  | 7  |
| G6PD deficiency                                     | fatality   | 1    | 0  | 0.75  | 1.25 | 2 | 0.031  | 8  |
| G6PD deficiency                                     | occurrence | 0    | -1 | 0     | 1    | 2 | 0.345  | 8  |
| G6PD trait                                          | occurrence | 0    | -2 | -0.25 | 0.25 | 2 | 1      | 8  |
| Gallbladder and biliary diseases                    | fatality   | 1    | 0  | 1     | 1    | 1 | 0.006  | 9  |
| Gallbladder and biliary diseases                    | occurrence | 0    | 0  | 0     | 0    | 1 | 1      | 9  |
| Gallbladder and biliary tract cancer                | fatality   | 2    | 0  | 1     | 2    | 2 | <0.001 | 26 |
| Gallbladder and biliary tract cancer                | occurrence | 0    | -1 | -1    | 0    | 1 | 0.023  | 27 |
| Gastritis and duodenitis                            | fatality   | 1    | 0  | 1     | 1    | 2 | 0.008  | 10 |
| Gastritis and duodenitis                            | occurrence | 0.5  | -1 | 0     | 1    | 2 | 0.12   | 10 |
| Genital prolapse                                    | fatality   | 0.5  | 0  | 0     | 1    | 2 | 0.089  | 8  |
| Genital prolapse                                    | occurrence | 1    | 1  | 1     | 1    | 1 | 0.006  | 8  |
| Glaucoma                                            | occurrence | 0.5  | 0  | 0     | 1.75 | 2 | 0.174  | 6  |
| Gout                                                | occurrence | -1   | -2 | -2    | 0    | 0 | 0.007  | 14 |
| Hemorrhagic stroke                                  | fatality   | 2    | -1 | 1     | 2    | 2 | <0.001 | 31 |
| Hemorrhagic stroke                                  | occurrence | 1    | -2 | -0.5  | 1    | 2 | 0.039  | 31 |
| Hodgkin lymphoma                                    | fatality   | 1.5  | 0  | 1     | 2    | 2 | <0.001 | 24 |
| Hodgkin lymphoma                                    | occurrence | 0    | -1 | 0     | 0.75 | 2 | 0.308  | 26 |
| Hypertensive heart disease                          | fatality   | 2    | -2 | 1     | 2    | 2 | <0.001 | 30 |
| Hypertensive heart disease                          | occurrence | 0    | -2 | -1    | 1    | 2 | 0.438  | 30 |
| Idiopathic developmental intellectual disability    | occurrence | 0    | -1 | 0     | 1    | 1 | 0.073  | 13 |
| Inflammatory bowel disease                          | fatality   | 1    | 1  | 1     | 1    | 2 | 0.003  | 10 |
| Inflammatory bowel disease                          | occurrence | -0.5 | -1 | -1    | 0    | 2 | 0.374  | 10 |
| Inguinal, femoral, and abdominal hernia             | fatality   | 1    | 0  | 0.75  | 2    | 2 | 0.032  | 8  |
| Inguinal, femoral, and abdominal hernia             | occurrence | 1    | 0  | 0     | 1    | 1 | 0.02   | 9  |
| Interstitial nephritis and urinary tract infections | fatality   | 1    | 0  | 1     | 2    | 2 | 0.001  | 15 |
| Interstitial nephritis and urinary tract infections | occurrence | 1    | 0  | 0     | 1    | 2 | 0.004  | 16 |
| Ischemic heart disease                              | fatality   | 2    | 1  | 1     | 2    | 2 | <0.001 | 29 |
| Ischemic heart disease                              | occurrence | -1   | -2 | -1    | 1    | 2 | 0.05   | 29 |
| Ischemic stroke                                     | fatality   | 2    | -1 | 1     | 2    | 2 | <0.001 | 31 |
| Ischemic stroke                                     | occurrence | 0    | -2 | -1    | 1    | 2 | 0.729  | 31 |
| Kidney cancer                                       | fatality   | 1    | -1 | 1     | 2    | 2 | <0.001 | 28 |
| Kidney cancer                                       | occurrence | 0    | -1 | 0     | 0    | 1 | 0.299  | 29 |

|                                                    |            |      |    |       |       |   |        |    |
|----------------------------------------------------|------------|------|----|-------|-------|---|--------|----|
| Klinefelter syndrome                               | occurrence | 0    | -1 | 0     | 0     | 0 | 1      | 9  |
| Larynx cancer                                      | fatality   | 1.5  | -1 | 1     | 2     | 2 | <0.001 | 30 |
| Larynx cancer                                      | occurrence | 0    | -1 | 0     | 1     | 2 | 0.188  | 32 |
| Lip and oral cavity cancer                         | fatality   | 1    | -1 | 1     | 2     | 2 | <0.001 | 24 |
| Lip and oral cavity cancer                         | occurrence | 1    | -1 | 0     | 1     | 1 | 0.063  | 25 |
| Liver cancer due to alcohol use                    | fatality   | 1    | 0  | 1     | 2     | 2 | <0.001 | 26 |
| Liver cancer due to alcohol use                    | occurrence | 1    | -2 | 0     | 1     | 2 | 0.046  | 27 |
| Liver cancer due to hepatitis B                    | fatality   | 2    | 0  | 1     | 2     | 2 | <0.001 | 26 |
| Liver cancer due to hepatitis B                    | occurrence | 1    | 0  | 1     | 1.5   | 2 | <0.001 | 27 |
| Liver cancer due to hepatitis C                    | fatality   | 1.5  | 0  | 1     | 2     | 2 | <0.001 | 26 |
| Liver cancer due to hepatitis C                    | occurrence | 1    | 0  | 1     | 1     | 2 | <0.001 | 27 |
| Liver cancer due to other causes                   | fatality   | 1    | 0  | 1     | 2     | 2 | <0.001 | 26 |
| Liver cancer due to other causes                   | occurrence | 0    | -1 | 0     | 1     | 2 | 0.05   | 27 |
| Low back pain                                      | occurrence | 0    | -2 | -1    | 1     | 1 | 0.356  | 16 |
| Macular degeneration                               | occurrence | 0    | -1 | 0     | 0.75  | 2 | 0.586  | 6  |
| Major depressive disorder                          | occurrence | 0    | -1 | -1    | 1     | 2 | 0.83   | 16 |
| Male infertility                                   | occurrence | 0    | -1 | 0     | 0     | 1 | 1      | 7  |
| Malignant skin melanoma                            | fatality   | 1    | -1 | 1     | 2     | 2 | <0.001 | 23 |
| Malignant skin melanoma                            | occurrence | 0    | -2 | -1    | 1     | 2 | 0.562  | 24 |
| Medication overuse headache                        | occurrence | -1   | -1 | -1    | -0.75 | 0 | 0.02   | 8  |
| Mesothelioma                                       | fatality   | 2    | -1 | 1     | 2     | 2 | <0.001 | 29 |
| Mesothelioma                                       | occurrence | 0    | -1 | 0     | 1     | 1 | 0.301  | 29 |
| Migraine                                           | occurrence | 0    | -1 | -1    | 0     | 1 | 0.424  | 9  |
| Motor neuron disease                               | fatality   | 1    | -1 | 0.75  | 1.25  | 2 | 0.065  | 8  |
| Motor neuron disease                               | occurrence | 0    | -1 | -1    | 0     | 0 | 0.149  | 8  |
| Multiple myeloma                                   | fatality   | 1.5  | 0  | 1     | 2     | 2 | <0.001 | 24 |
| Multiple myeloma                                   | occurrence | 0    | -1 | 0     | 0     | 1 | 0.565  | 25 |
| Multiple sclerosis                                 | fatality   | 1    | -1 | 0.75  | 1.25  | 2 | 0.065  | 8  |
| Multiple sclerosis                                 | occurrence | -0.5 | -1 | -1    | 0     | 0 | 0.072  | 8  |
| Nasopharynx cancer                                 | fatality   | 1    | -1 | 1     | 2     | 2 | <0.001 | 24 |
| Nasopharynx cancer                                 | occurrence | 0    | -1 | 0     | 1     | 2 | 0.308  | 25 |
| Neck pain                                          | occurrence | 0    | -2 | -1    | 0     | 1 | 0.275  | 14 |
| Neural tube defects                                | fatality   | 1    | 1  | 1     | 1.75  | 2 | 0.031  | 6  |
| Neural tube defects                                | occurrence | 1    | 1  | 1     | 1.75  | 2 | 0.031  | 6  |
| Non-Hodgkin lymphoma                               | fatality   | 2    | 1  | 1     | 2     | 2 | <0.001 | 24 |
| Non-Hodgkin lymphoma                               | occurrence | 0    | -1 | 0     | 1     | 2 | 0.042  | 24 |
| Non-melanoma skin cancer (basal-cell carcinoma)    | fatality   | 1    | -1 | 1     | 2     | 2 | <0.001 | 23 |
| Non-melanoma skin cancer (basal-cell carcinoma)    | occurrence | 0    | -2 | -1    | 0     | 1 | 0.212  | 24 |
| Non-melanoma skin cancer (squamous-cell carcinoma) | fatality   | 1    | 0  | 1     | 2     | 2 | <0.001 | 22 |
| Non-melanoma skin cancer (squamous-cell carcinoma) | occurrence | 0    | -2 | -1    | 1     | 1 | 0.66   | 24 |
| Opioid use disorders                               | fatality   | 0    | -1 | -0.75 | 1     | 1 | 0.565  | 14 |
| Opioid use disorders                               | occurrence | -1   | -2 | -2    | -1    | 1 | 0.011  | 15 |

|                                            |            |     |    |       |      |   |        |    |
|--------------------------------------------|------------|-----|----|-------|------|---|--------|----|
| Osteoarthritis                             | occurrence | 0   | -2 | -1    | 0    | 1 | 0.158  | 14 |
| Other pneumoconiosis                       | fatality   | 1   | 1  | 1     | 2    | 2 | <0.001 | 15 |
| Other pneumoconiosis                       | occurrence | 1   | -1 | 0.5   | 1    | 2 | 0.006  | 15 |
| Ovarian cancer                             | fatality   | 2   | 0  | 1     | 2    | 2 | <0.001 | 22 |
| Ovarian cancer                             | occurrence | 0   | -1 | 0     | 0.5  | 1 | 0.182  | 23 |
| Pancreatic cancer                          | fatality   | 1.5 | 0  | 1     | 2    | 2 | <0.001 | 26 |
| Pancreatic cancer                          | occurrence | 0   | -1 | -0.5  | 0    | 1 | 0.11   | 27 |
| Pancreatitis                               | fatality   | 1   | 0  | 1     | 1    | 1 | 0.006  | 9  |
| Pancreatitis                               | occurrence | 0   | -1 | 0     | 0    | 1 | 0.773  | 9  |
| Paralytic ileus and intestinal obstruction | fatality   | 1.5 | 1  | 1     | 2    | 2 | 0.012  | 8  |
| Paralytic ileus and intestinal obstruction | occurrence | 1   | -1 | 0     | 1    | 2 | 0.12   | 9  |
| Parkinson disease                          | fatality   | 1   | 0  | 1     | 1    | 2 | 0.01   | 9  |
| Parkinson disease                          | occurrence | 0   | -1 | -1    | 0    | 1 | 0.424  | 9  |
| Peptic ulcer disease                       | fatality   | 1   | 0  | 0.75  | 2    | 2 | 0.032  | 8  |
| Peptic ulcer disease                       | occurrence | 1   | -1 | 0     | 1    | 2 | 0.105  | 9  |
| Periodontal diseases                       | occurrence | 1   | -1 | 1     | 1    | 2 | 0.203  | 5  |
| Peripheral vascular disease                | fatality   | 2   | 1  | 1     | 2    | 2 | <0.001 | 28 |
| Peripheral vascular disease                | occurrence | 0   | -2 | -1    | 1    | 2 | 0.475  | 28 |
| Permanent caries                           | occurrence | 1   | -1 | -1    | 2    | 2 | 0.408  | 5  |
| Polycystic ovarian syndrome                | fatality   | 0   | 0  | 0     | 0    | 0 | NaN    | 9  |
| Polycystic ovarian syndrome                | occurrence | 0   | -1 | -1    | 0    | 0 | 0.072  | 9  |
| Premenstrual syndrome                      | occurrence | 0   | -1 | -0.25 | 0    | 1 | 0.773  | 8  |
| Prostate cancer                            | fatality   | 1   | 0  | 1     | 2    | 2 | <0.001 | 22 |
| Prostate cancer                            | occurrence | 0   | -1 | 0     | 0    | 1 | 0.777  | 24 |
| Pruritus                                   | occurrence | 1   | 0  | 0     | 1    | 2 | 0.089  | 7  |
| Psoriasis                                  | occurrence | 0   | -2 | -0.5  | 1    | 1 | 1      | 7  |
| Pyoderma                                   | fatality   | 1   | 1  | 1     | 1    | 2 | 0.015  | 7  |
| Pyoderma                                   | occurrence | 1   | 0  | 0.5   | 1.5  | 2 | 0.053  | 7  |
| Refraction and accommodation disorders     | occurrence | 0   | -1 | 0     | 0.75 | 1 | 0.773  | 6  |
| Rheumatic heart disease                    | fatality   | 2   | 1  | 2     | 2    | 2 | <0.001 | 27 |
| Rheumatic heart disease                    | occurrence | 2   | 0  | 2     | 2    | 2 | <0.001 | 26 |
| Rheumatoid arthritis                       | fatality   | 1   | 0  | 1     | 1    | 2 | 0.003  | 13 |
| Rheumatoid arthritis                       | occurrence | 0   | -1 | 0     | 0    | 1 | 1      | 14 |
| Scabies                                    | occurrence | 2   | 0  | 1     | 2    | 2 | 0.018  | 8  |
| Schizophrenia                              | fatality   | 1   | 0  | 1     | 2    | 2 | 0.003  | 14 |
| Schizophrenia                              | occurrence | 0   | -1 | 0     | 1    | 2 | 0.24   | 15 |
| Sickle cell disorders                      | fatality   | 2   | 0  | 1     | 2    | 2 | 0.018  | 9  |
| Sickle cell disorders                      | occurrence | 0   | 0  | 0     | 1    | 2 | 0.089  | 9  |
| Sickle cell trait                          | occurrence | 0   | 0  | 0     | 1    | 2 | 0.174  | 9  |
| Silicosis                                  | fatality   | 1   | 0  | 1     | 2    | 2 | 0.001  | 16 |
| Silicosis                                  | occurrence | 1   | -2 | 0     | 1    | 2 | 0.056  | 16 |
| Stomach cancer                             | fatality   | 1   | 0  | 1     | 2    | 2 | <0.001 | 27 |

|                                     |            |     |    |       |      |   |        |    |
|-------------------------------------|------------|-----|----|-------|------|---|--------|----|
| Stomach cancer                      | occurrence | 0   | -1 | 0     | 1    | 1 | 0.208  | 28 |
| Sudden infant death syndrome        | occurrence | 0   | -1 | 0     | 1    | 2 | 0.124  | 16 |
| Tension-type headache               | occurrence | 0   | -2 | -1    | 1    | 1 | 0.824  | 8  |
| Testicular cancer                   | fatality   | 1   | 0  | 1     | 2    | 2 | <0.001 | 22 |
| Testicular cancer                   | occurrence | 0   | -1 | 0     | 0    | 1 | 0.773  | 23 |
| Thalassemias                        | fatality   | 1   | 0  | 0.75  | 2    | 2 | 0.032  | 8  |
| Thalassemias                        | occurrence | 0   | 0  | 0     | 0.25 | 2 | 0.371  | 8  |
| Thalassemias trait                  | occurrence | 0   | -1 | 0     | 1    | 2 | 0.345  | 8  |
| Thyroid cancer                      | fatality   | 1   | -1 | 1     | 2    | 2 | <0.001 | 21 |
| Thyroid cancer                      | occurrence | 0   | -1 | -0.75 | 0    | 2 | 0.824  | 22 |
| Tracheal, bronchus, and lung cancer | fatality   | 2   | -1 | 1     | 2    | 2 | <0.001 | 29 |
| Tracheal, bronchus, and lung cancer | occurrence | 0   | -2 | 0     | 1    | 1 | 0.209  | 30 |
| Turner syndrome                     | occurrence | 0   | -1 | 0     | 0    | 0 | 0.346  | 9  |
| Type 1 diabetes mellitus            | fatality   | 2   | 0  | 1     | 2    | 2 | <0.001 | 33 |
| Type 1 diabetes mellitus            | occurrence | 0   | -2 | 0     | 0    | 2 | 1      | 34 |
| Type 2 diabetes mellitus            | fatality   | 2   | 0  | 1     | 2    | 2 | <0.001 | 32 |
| Type 2 diabetes mellitus            | occurrence | -1  | -2 | -1    | 0.75 | 1 | 0.009  | 34 |
| Urolithiasis                        | fatality   | 1   | 0  | 0     | 1    | 2 | 0.174  | 5  |
| Urolithiasis                        | occurrence | 0.5 | -1 | -0.75 | 1    | 1 | 0.766  | 6  |
| Urticaria                           | occurrence | 0   | 0  | 0     | 1    | 1 | 0.149  | 8  |
| Uterine cancer                      | fatality   | 2   | 0  | 1     | 2    | 2 | <0.001 | 22 |
| Uterine cancer                      | occurrence | 0   | -1 | 0     | 0.5  | 1 | 0.802  | 23 |
| Uterine fibroids                    | fatality   | 1   | 0  | 0     | 1    | 2 | 0.026  | 9  |
| Uterine fibroids                    | occurrence | 0   | -1 | 0     | 0    | 1 | 0.773  | 9  |
| Vascular intestinal disorders       | fatality   | 1   | 0  | 0     | 1    | 1 | 0.037  | 8  |
| Vascular intestinal disorders       | occurrence | 0   | -1 | -1    | 0    | 0 | 0.072  | 9  |
| Viral skin diseases                 | occurrence | 1   | -1 | 0     | 1    | 1 | 0.233  | 7  |

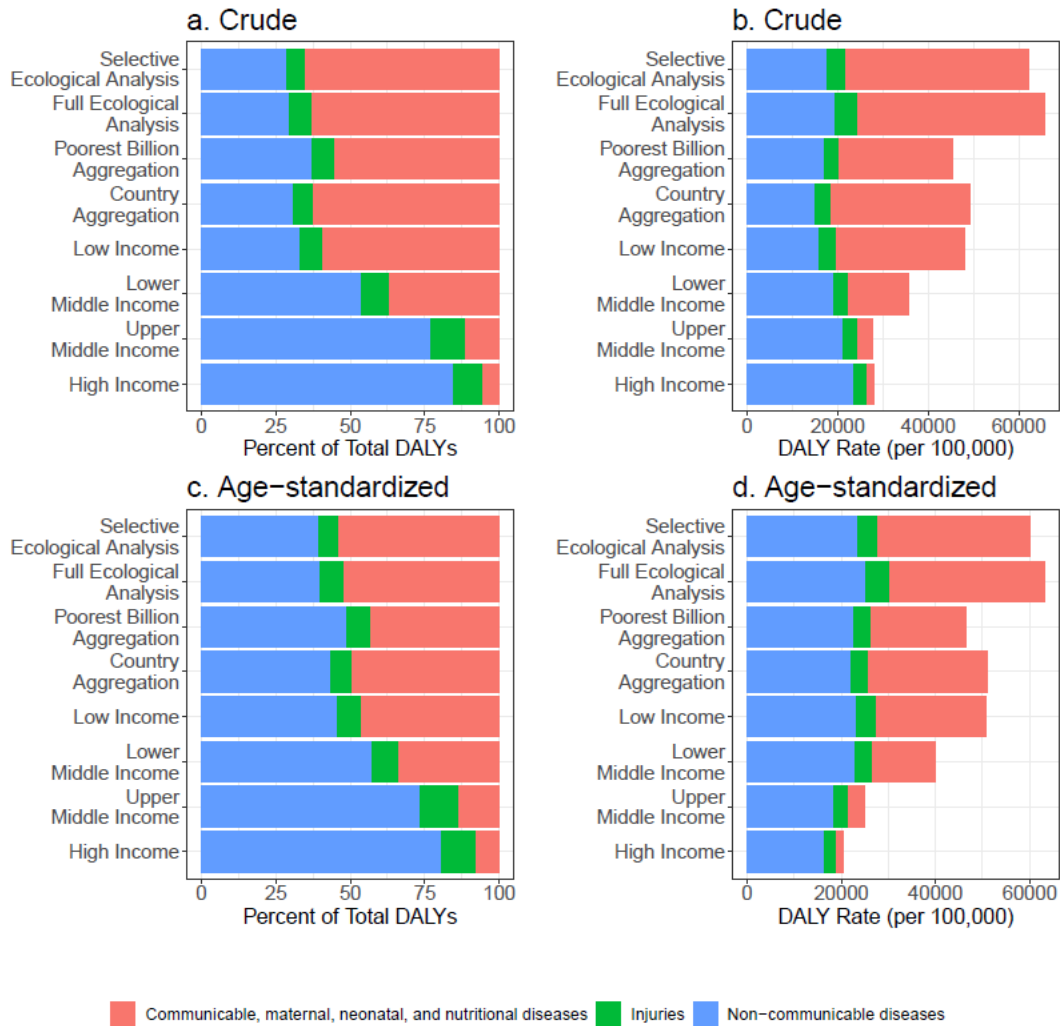

**Appendix Figure 3: Proportion of DALYs by broad cause groups, crude (a) and age-standardized (b); Rates of DALYs by broad cause groups, crude (c) and age-standardized (d), for five approaches to estimating the burden in the poorest billion and World Bank income groups**

Appendix Figure 4a. Cause-specific DALY Rates by Age, Full Ecological Approach

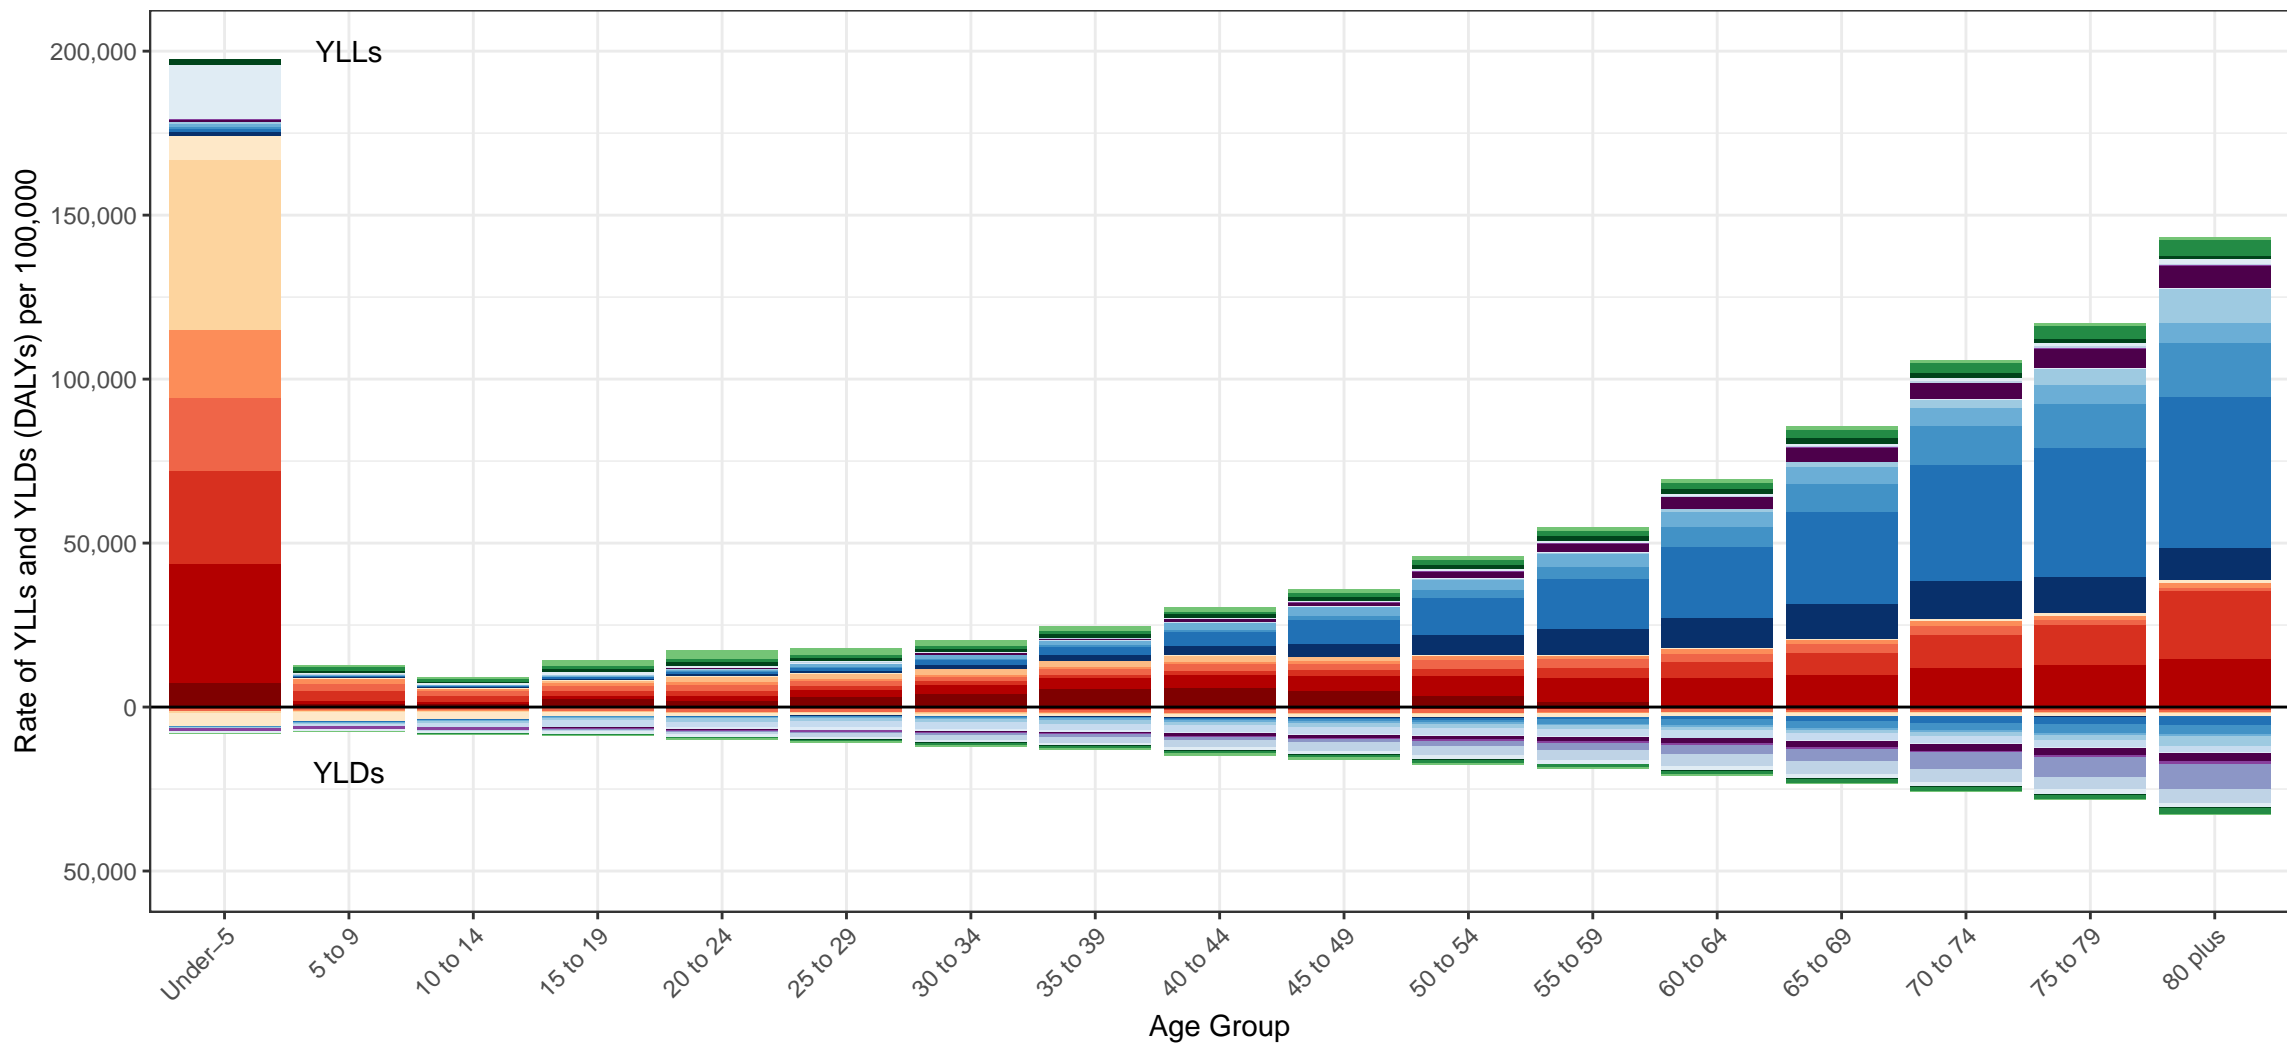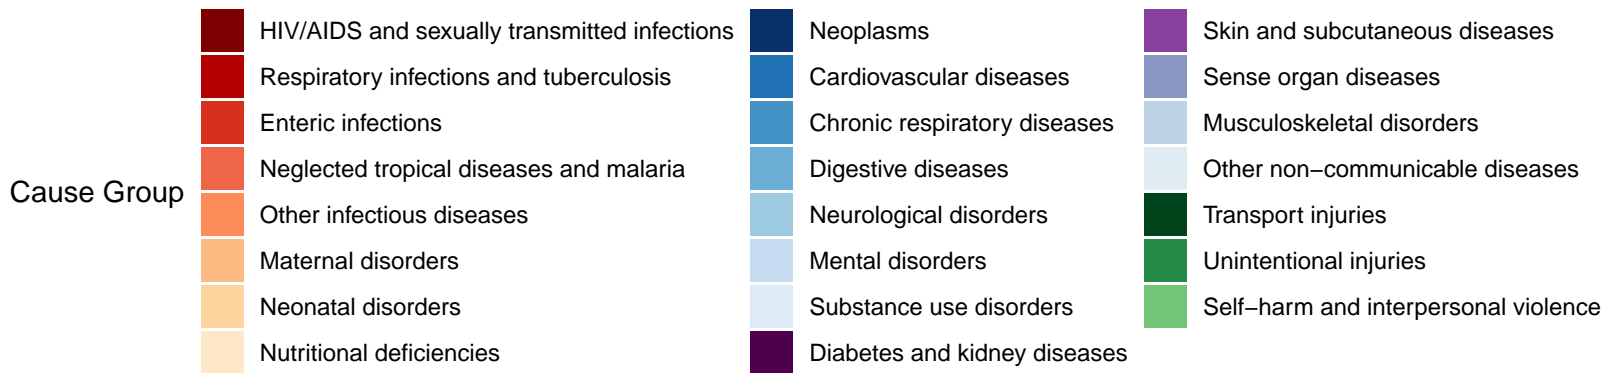

Appendix Figure 4b. Cause-specific DALY Rates by Age, Poorest Billion Aggregation

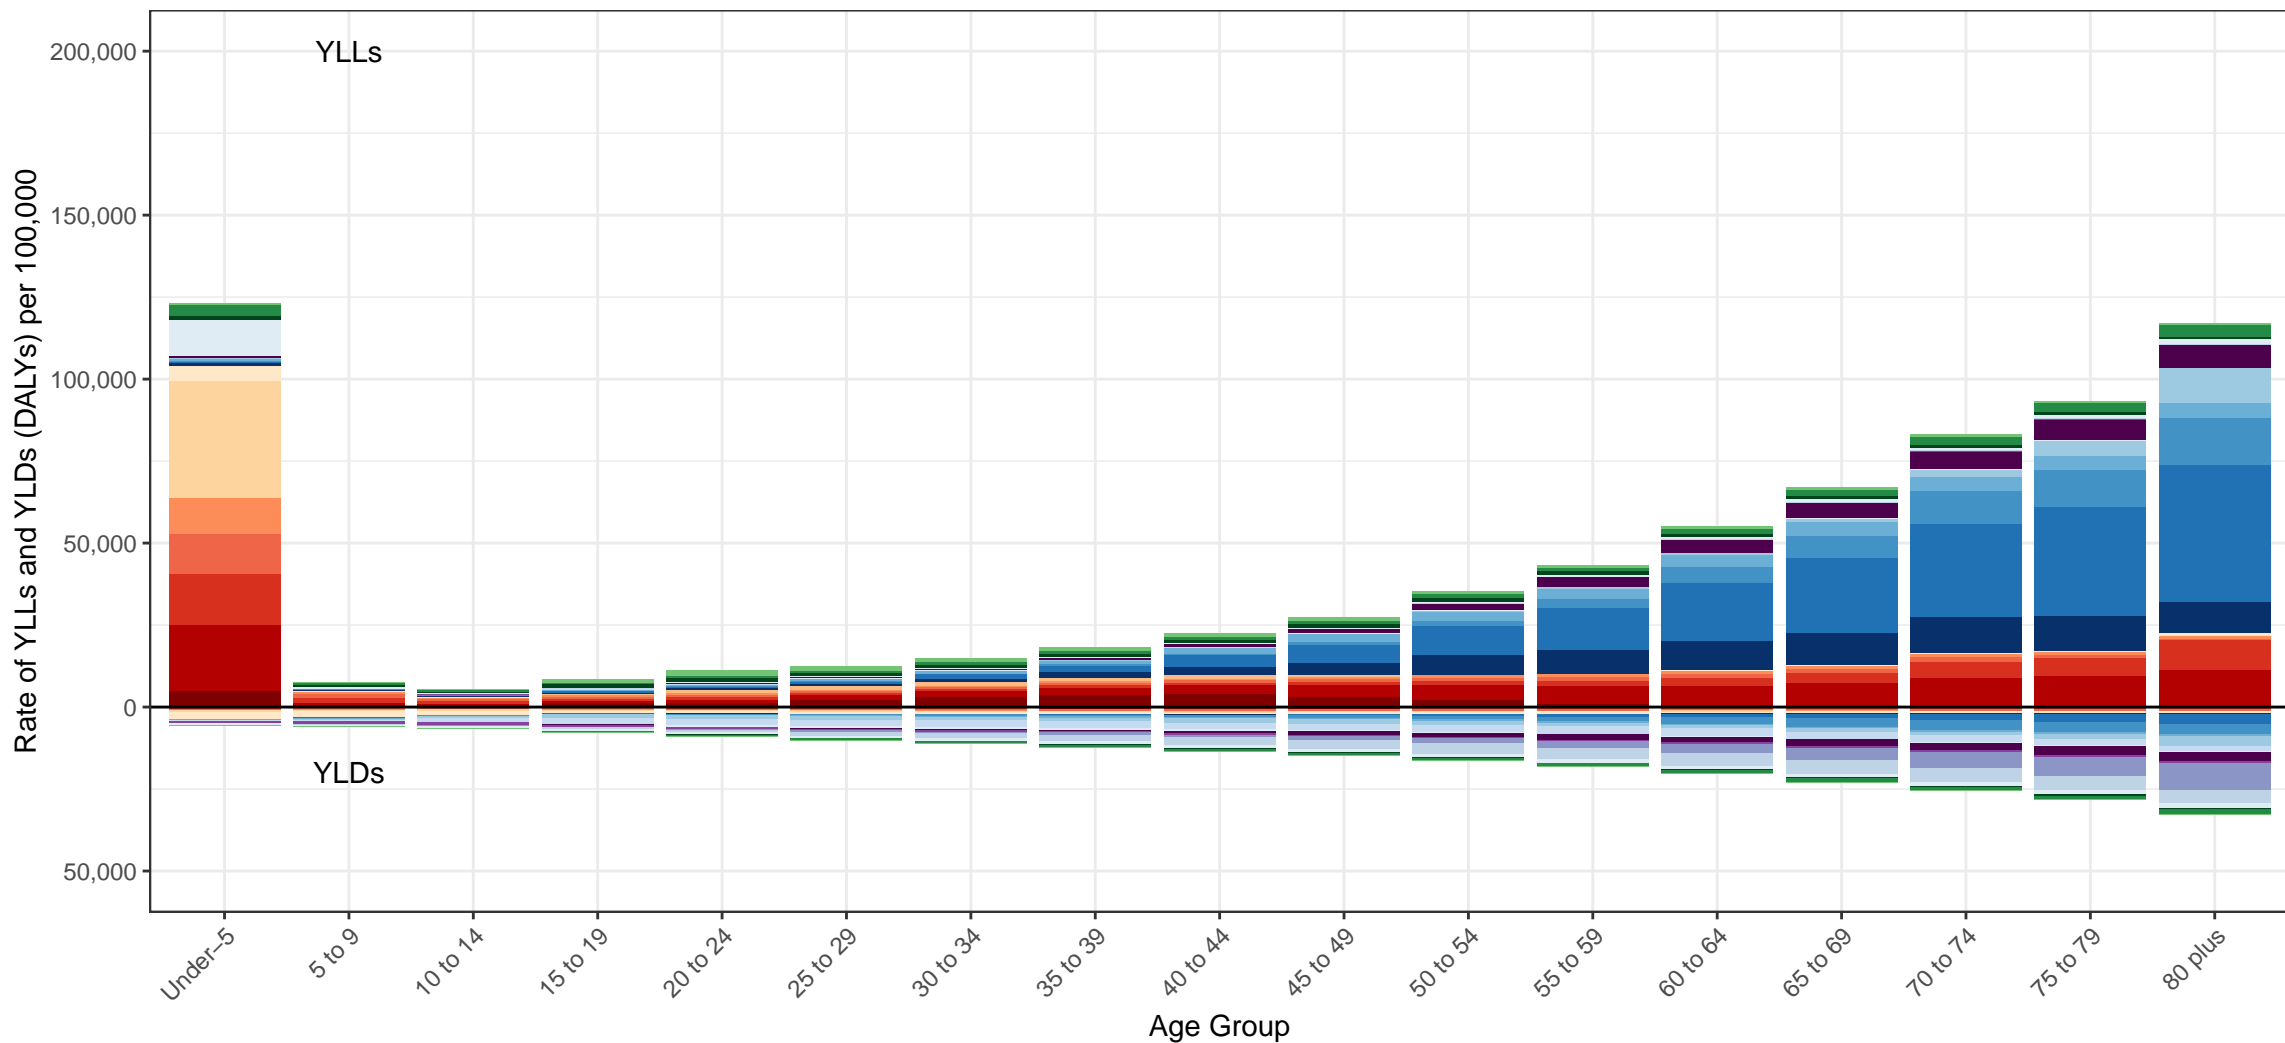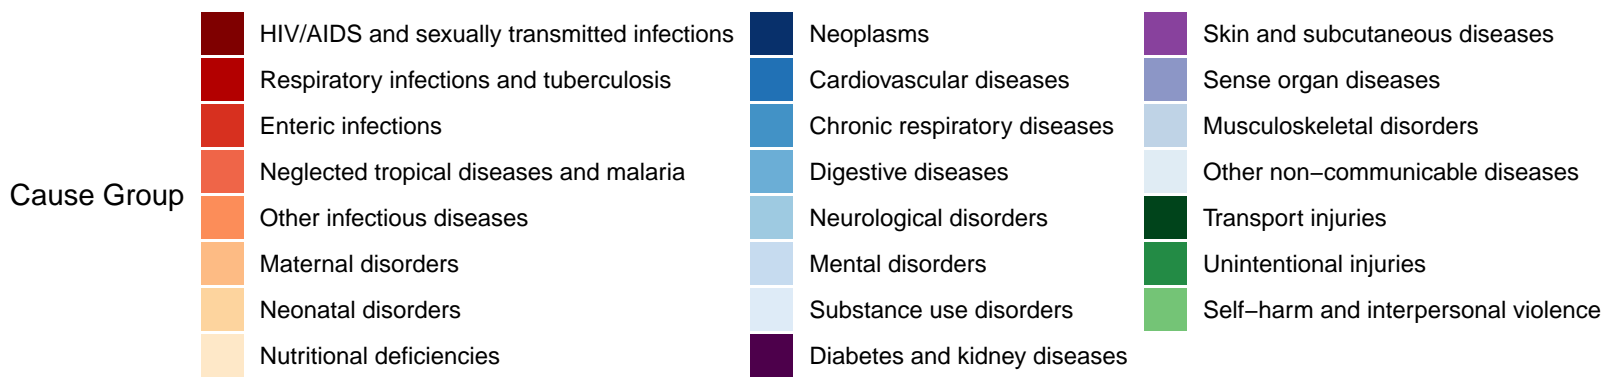

Appendix Figure 4c. Cause-specific DALY Rates by Age, Country Aggregation

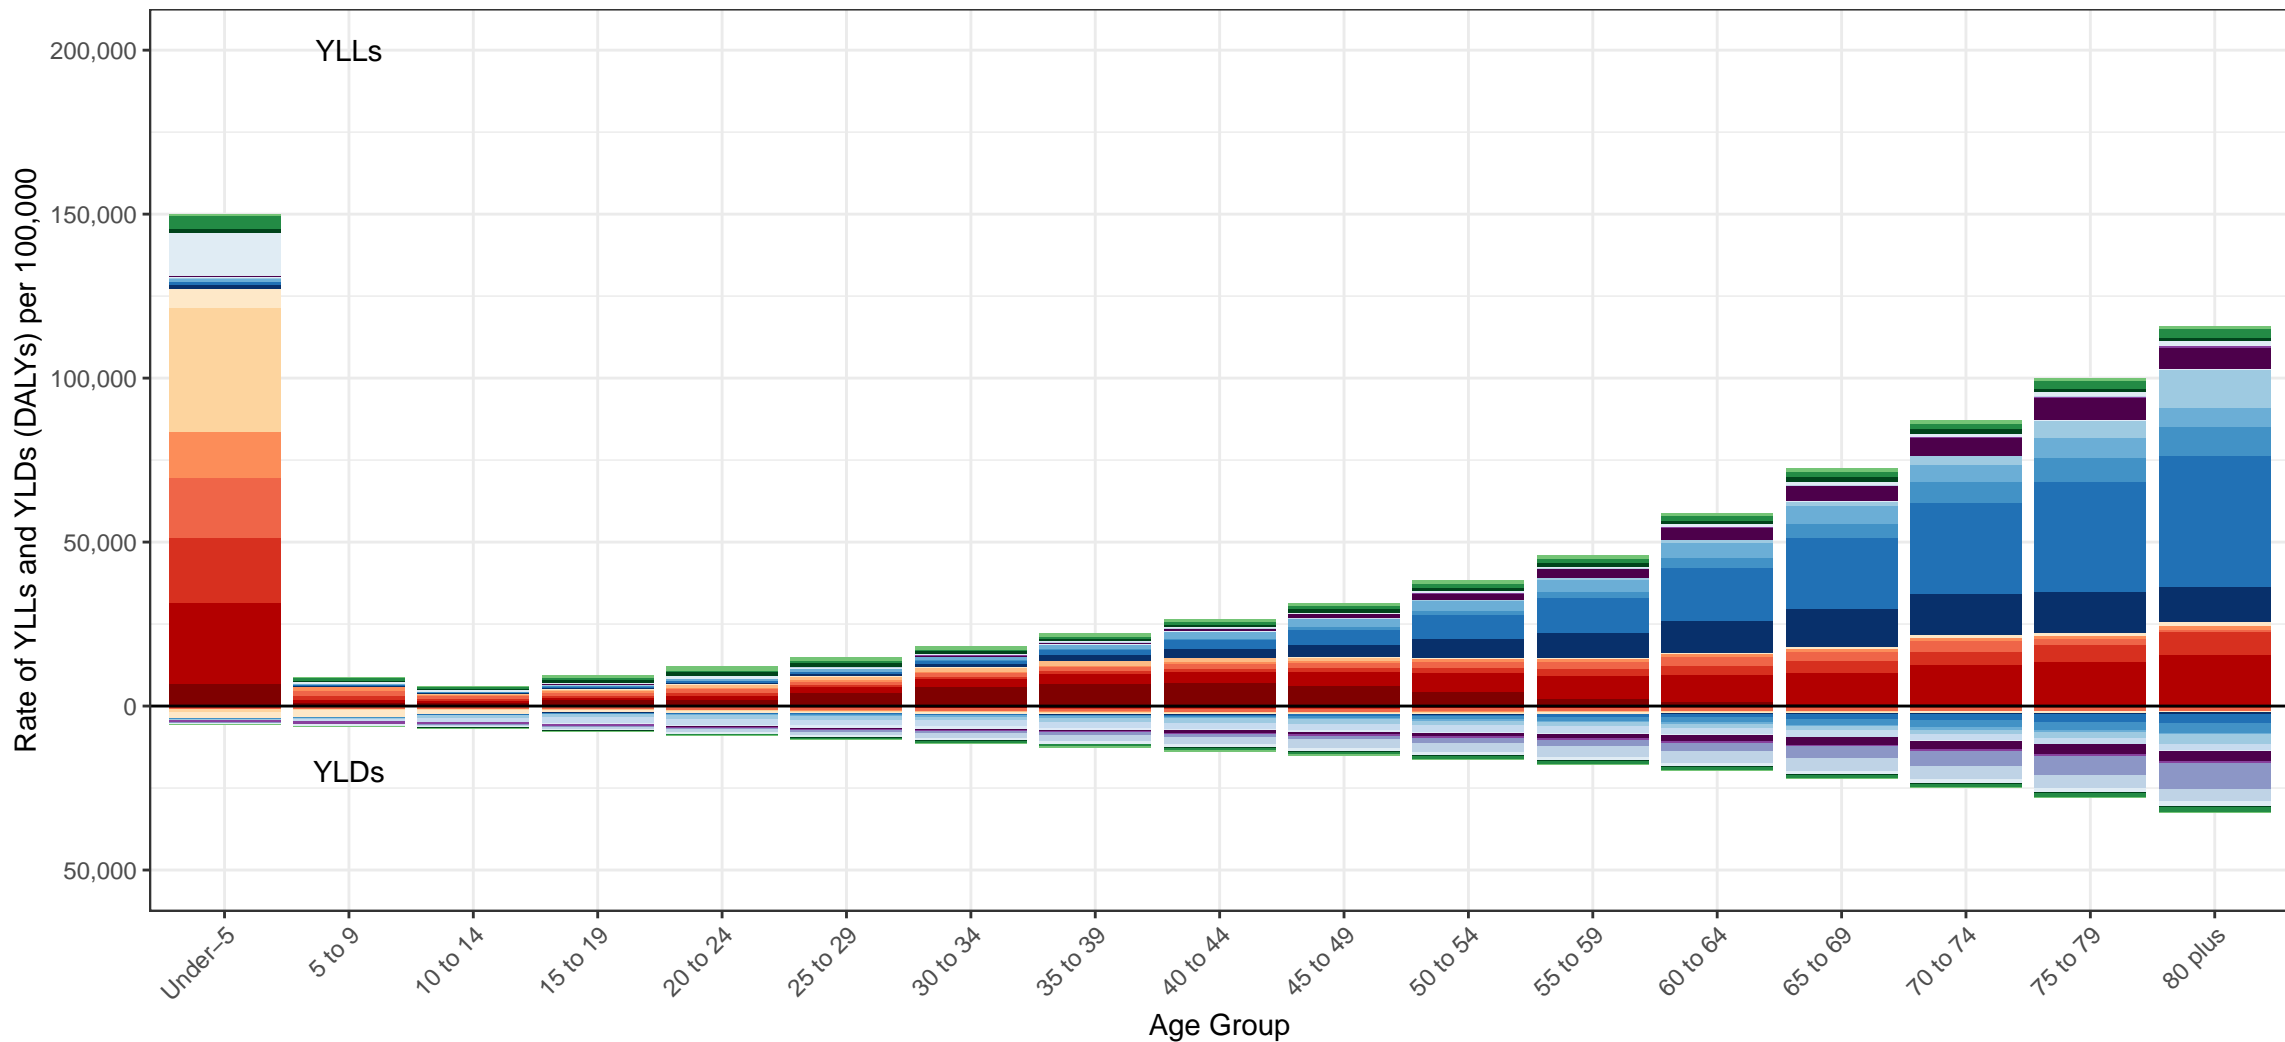



Appendix Figure 4d. Cause-specific DALY Rates by Age, Low-income Countries

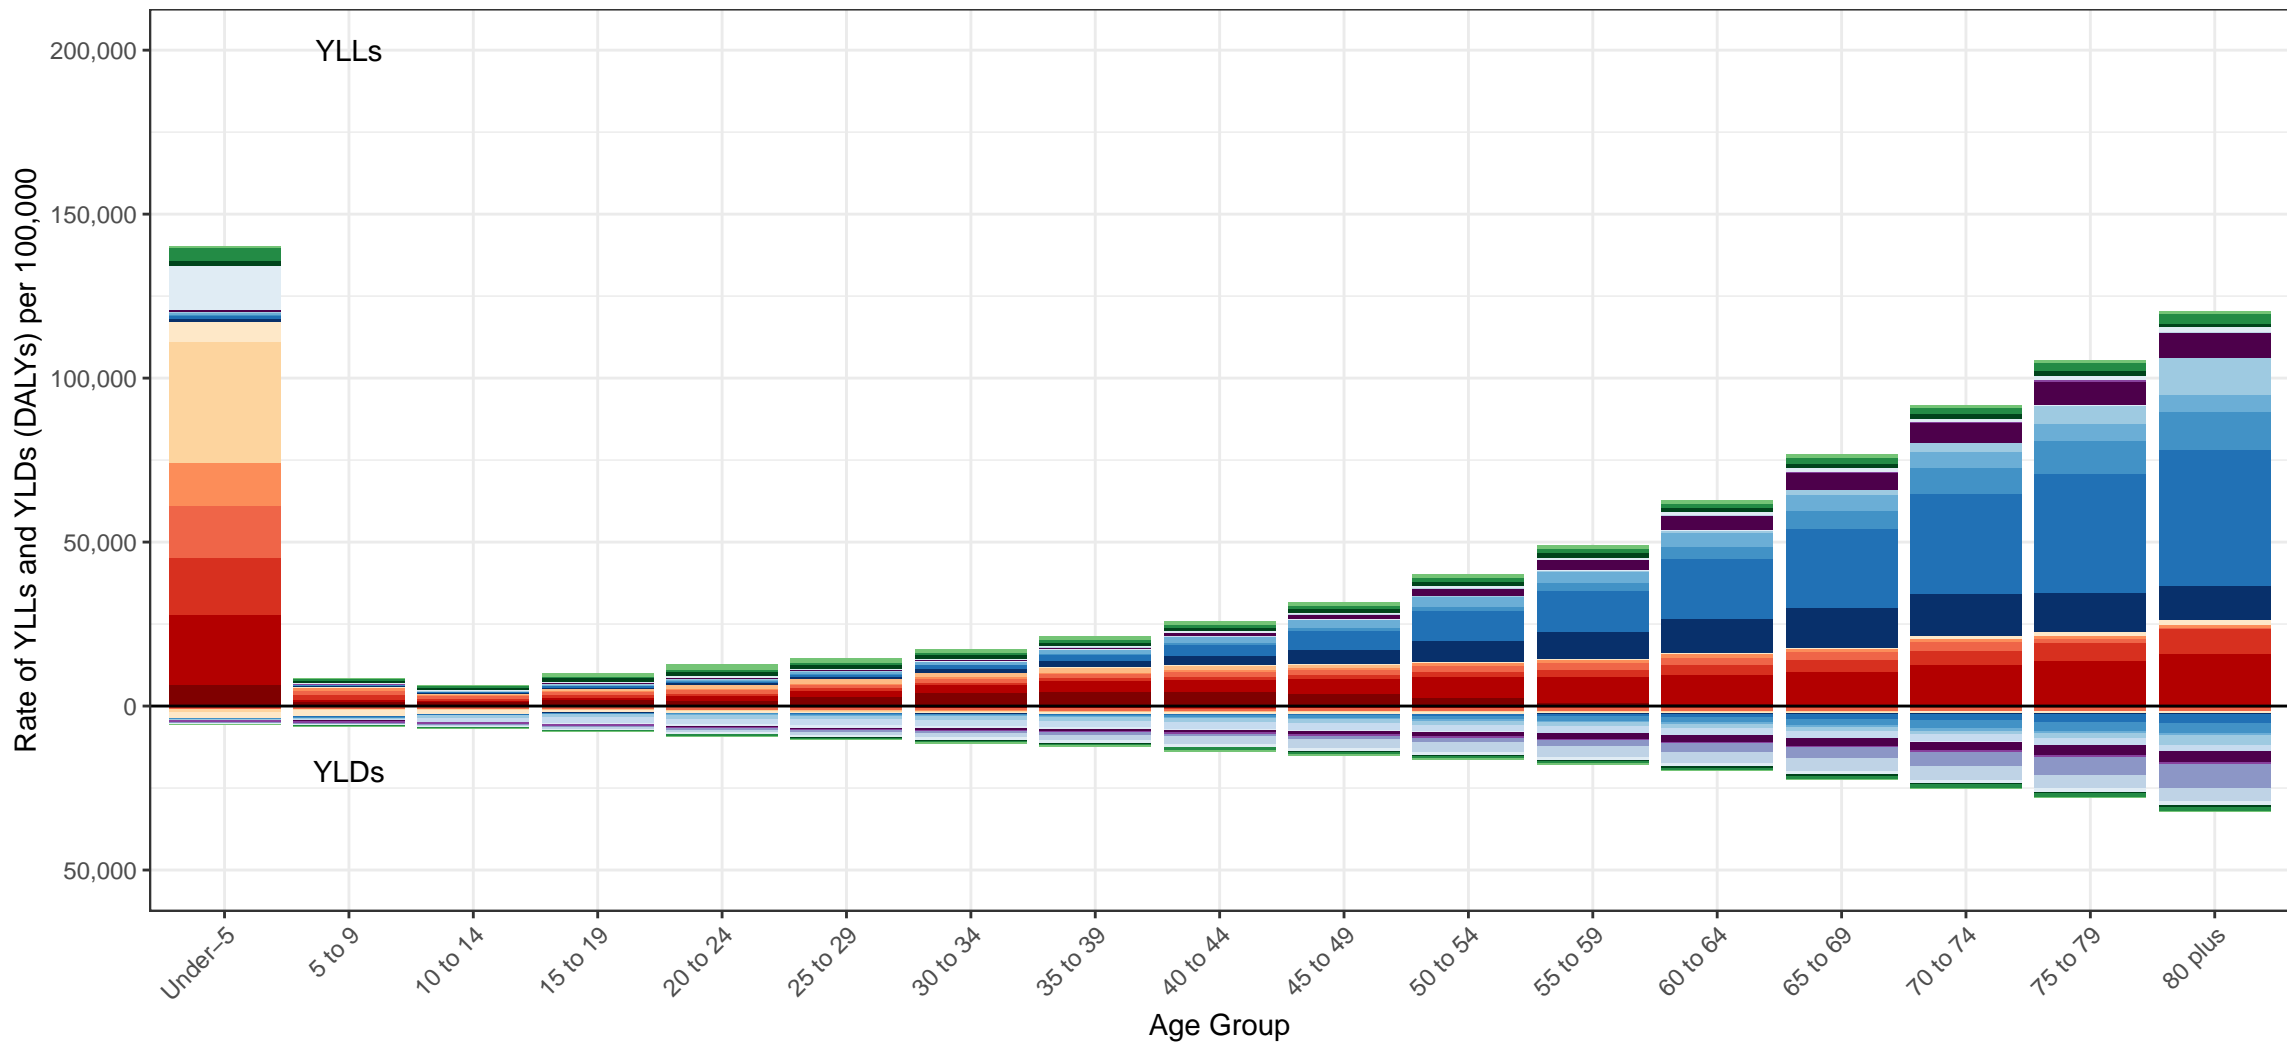

Appendix Figure 4e. Cause-specific DALY Rates by Age, Lower-middle-income Countries

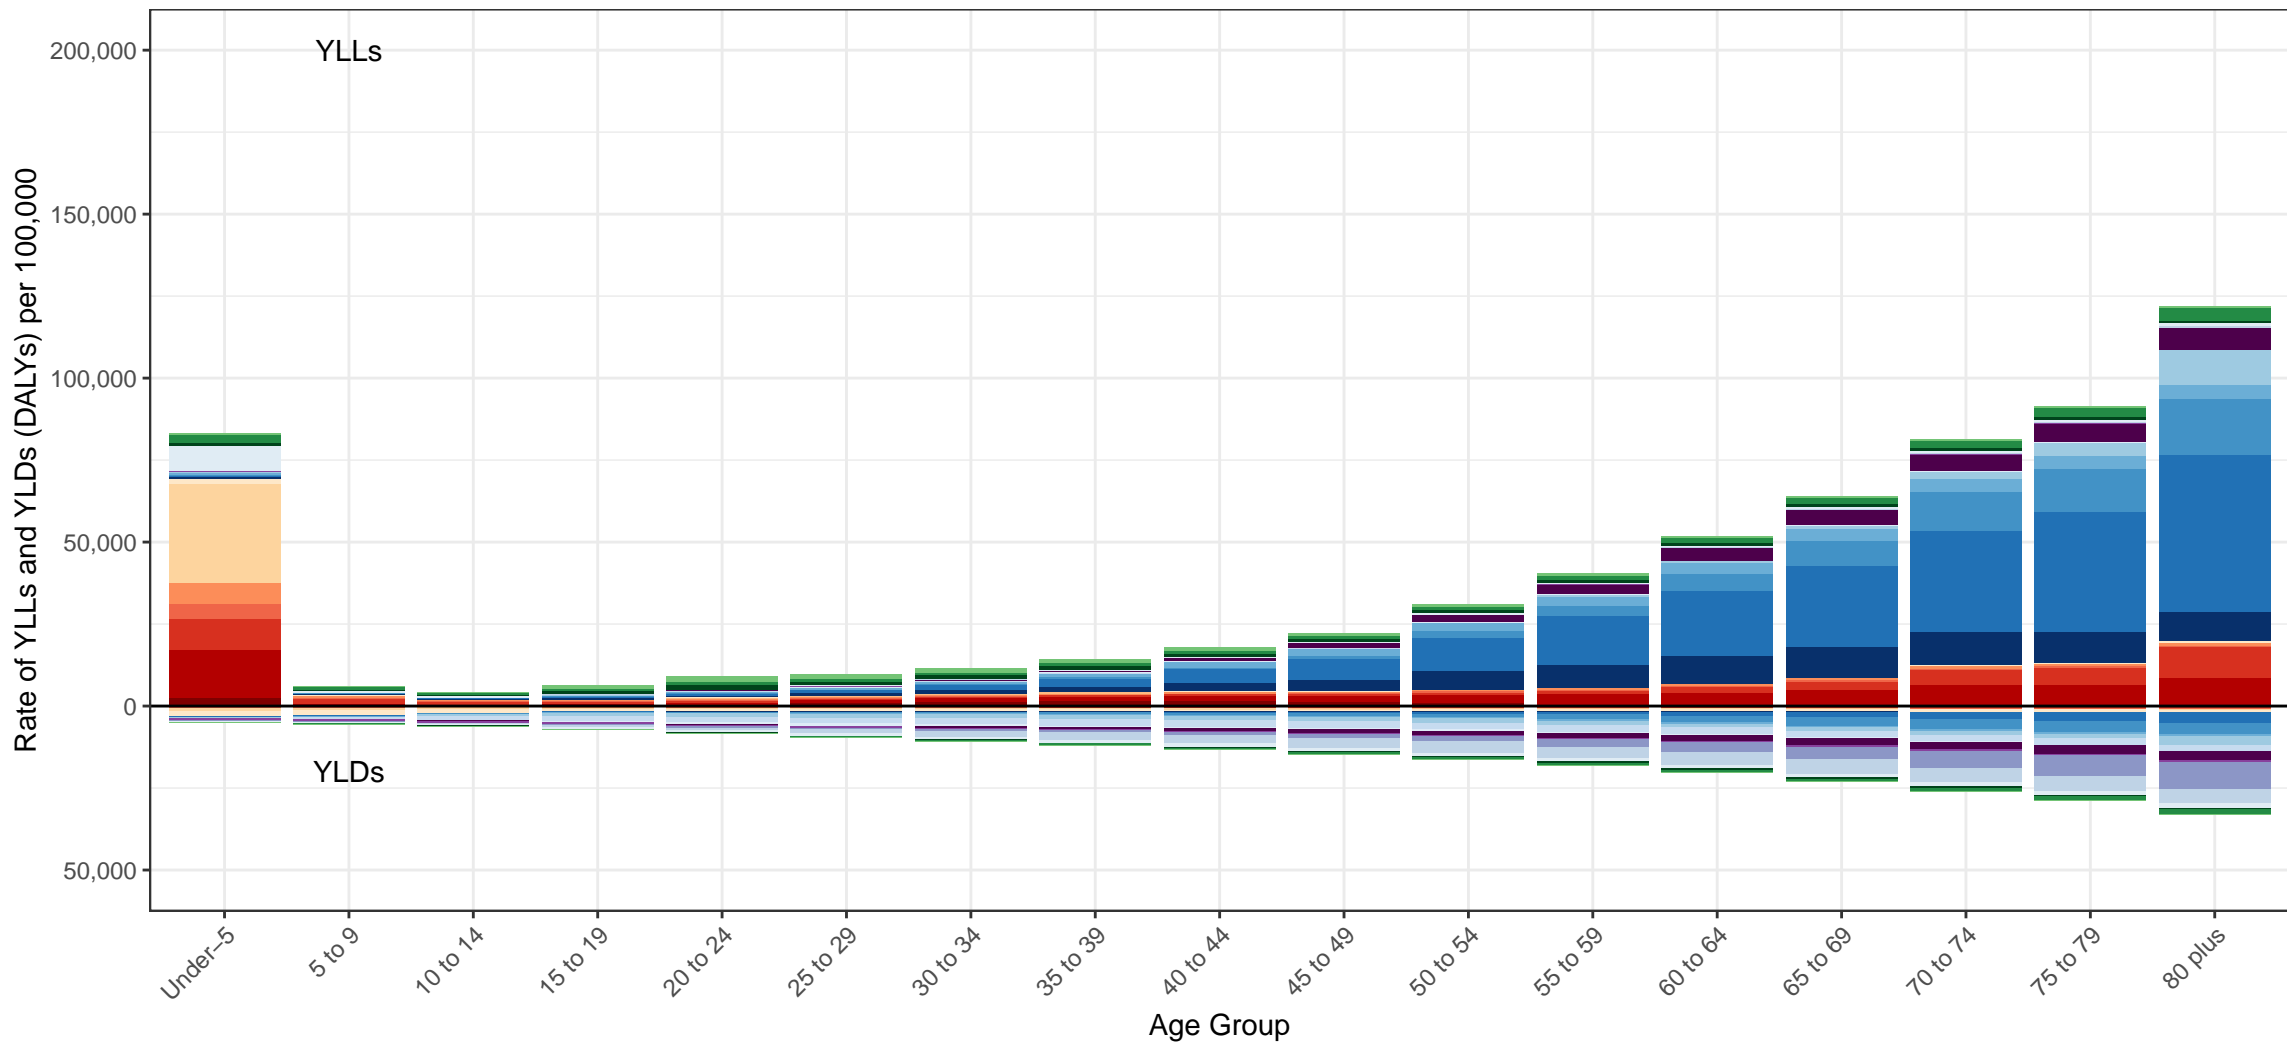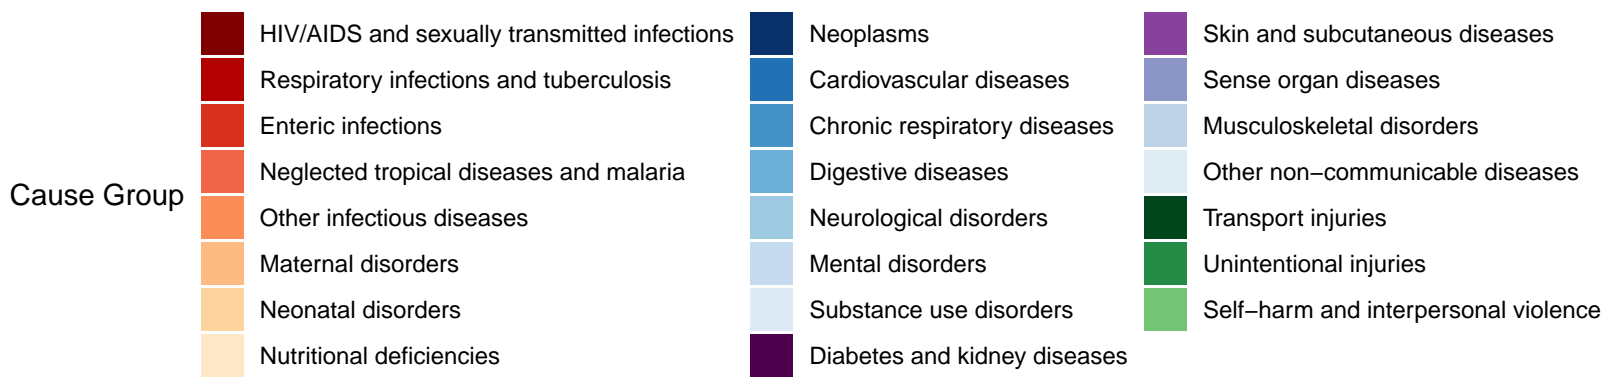

Appendix Figure 4f. Cause-specific DALY Rates by Age, Upper-middle-income Countries

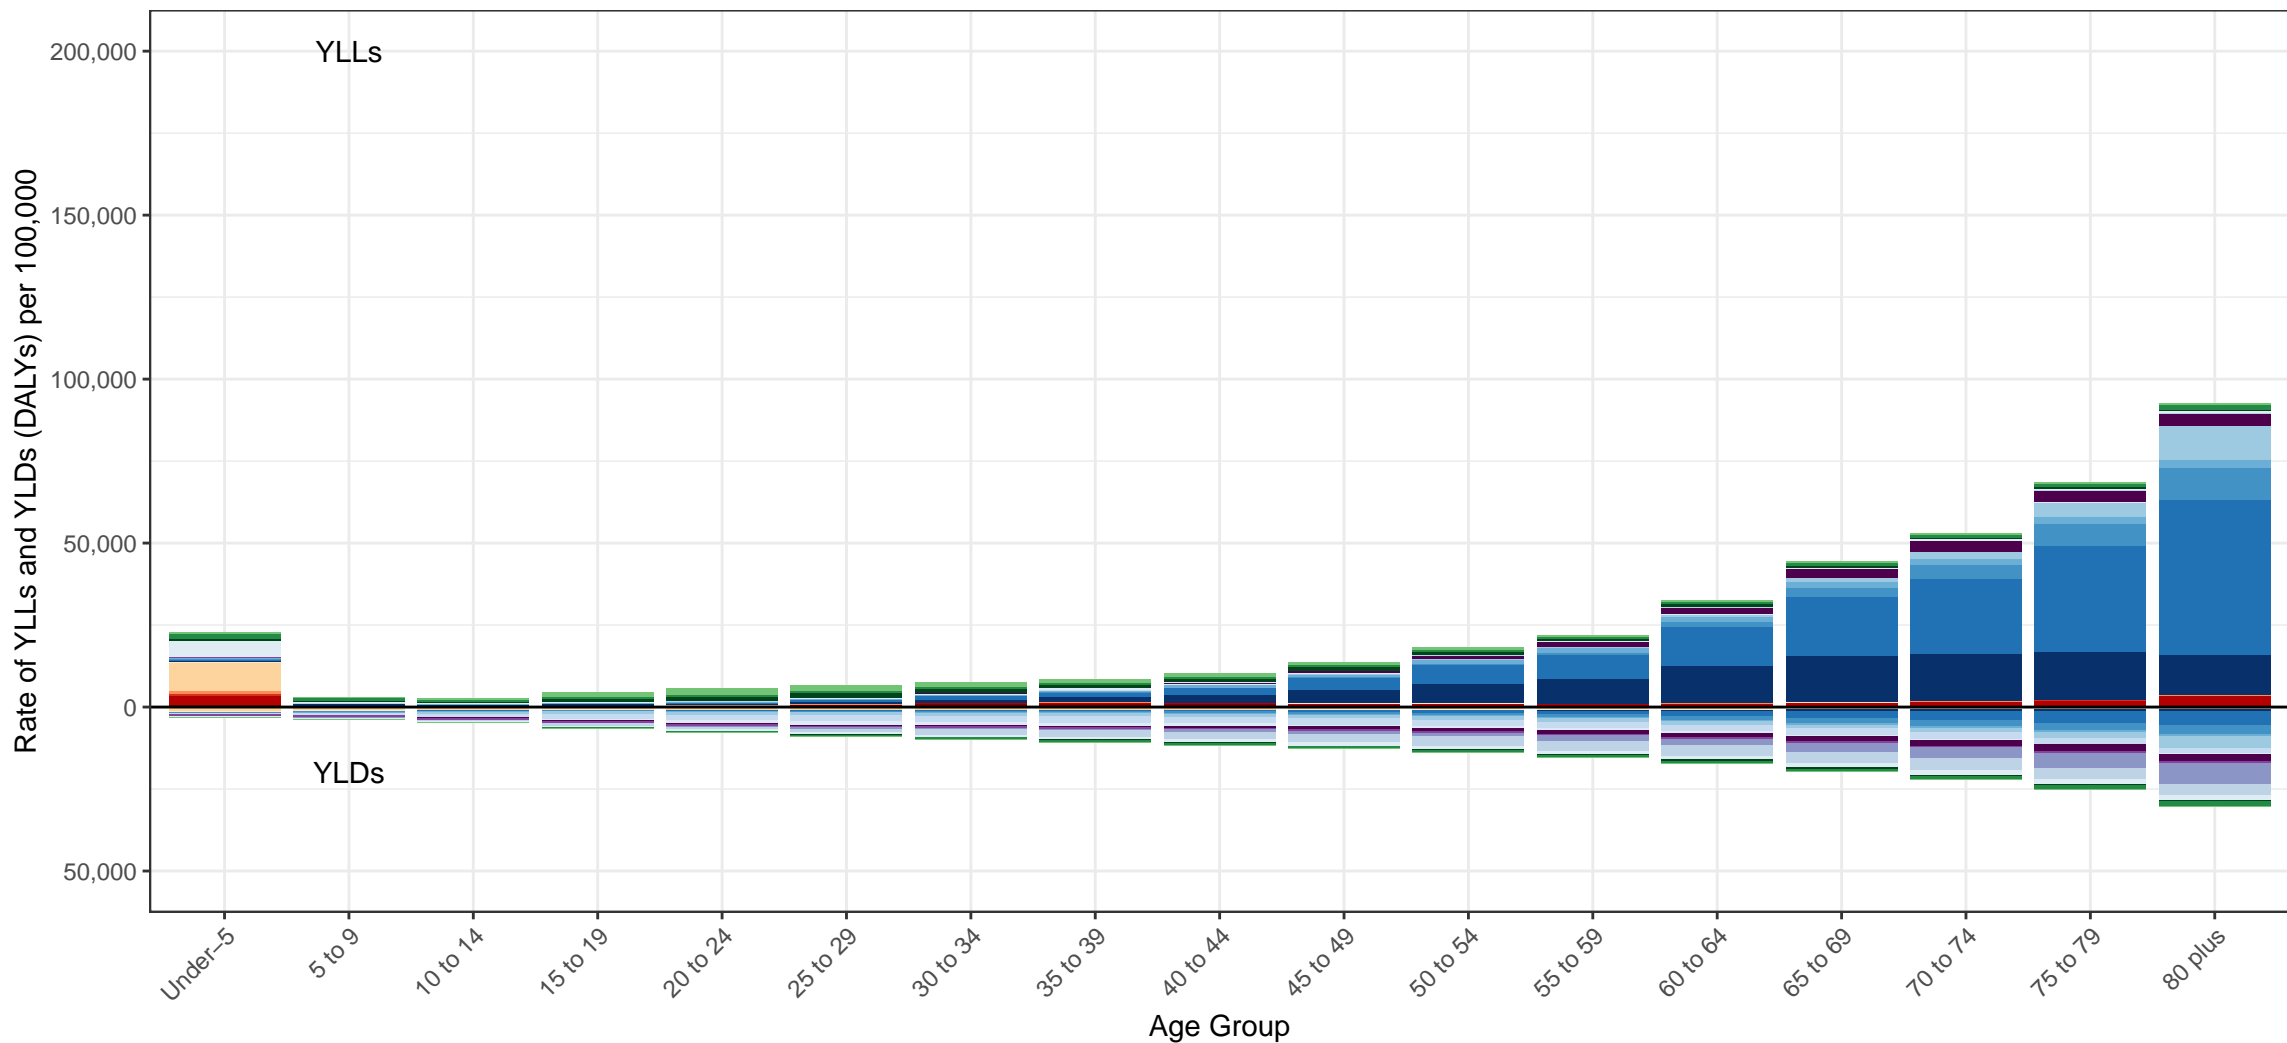

Appendix Figure 4g. Cause-specific DALY Rates by Age, High-income Countries

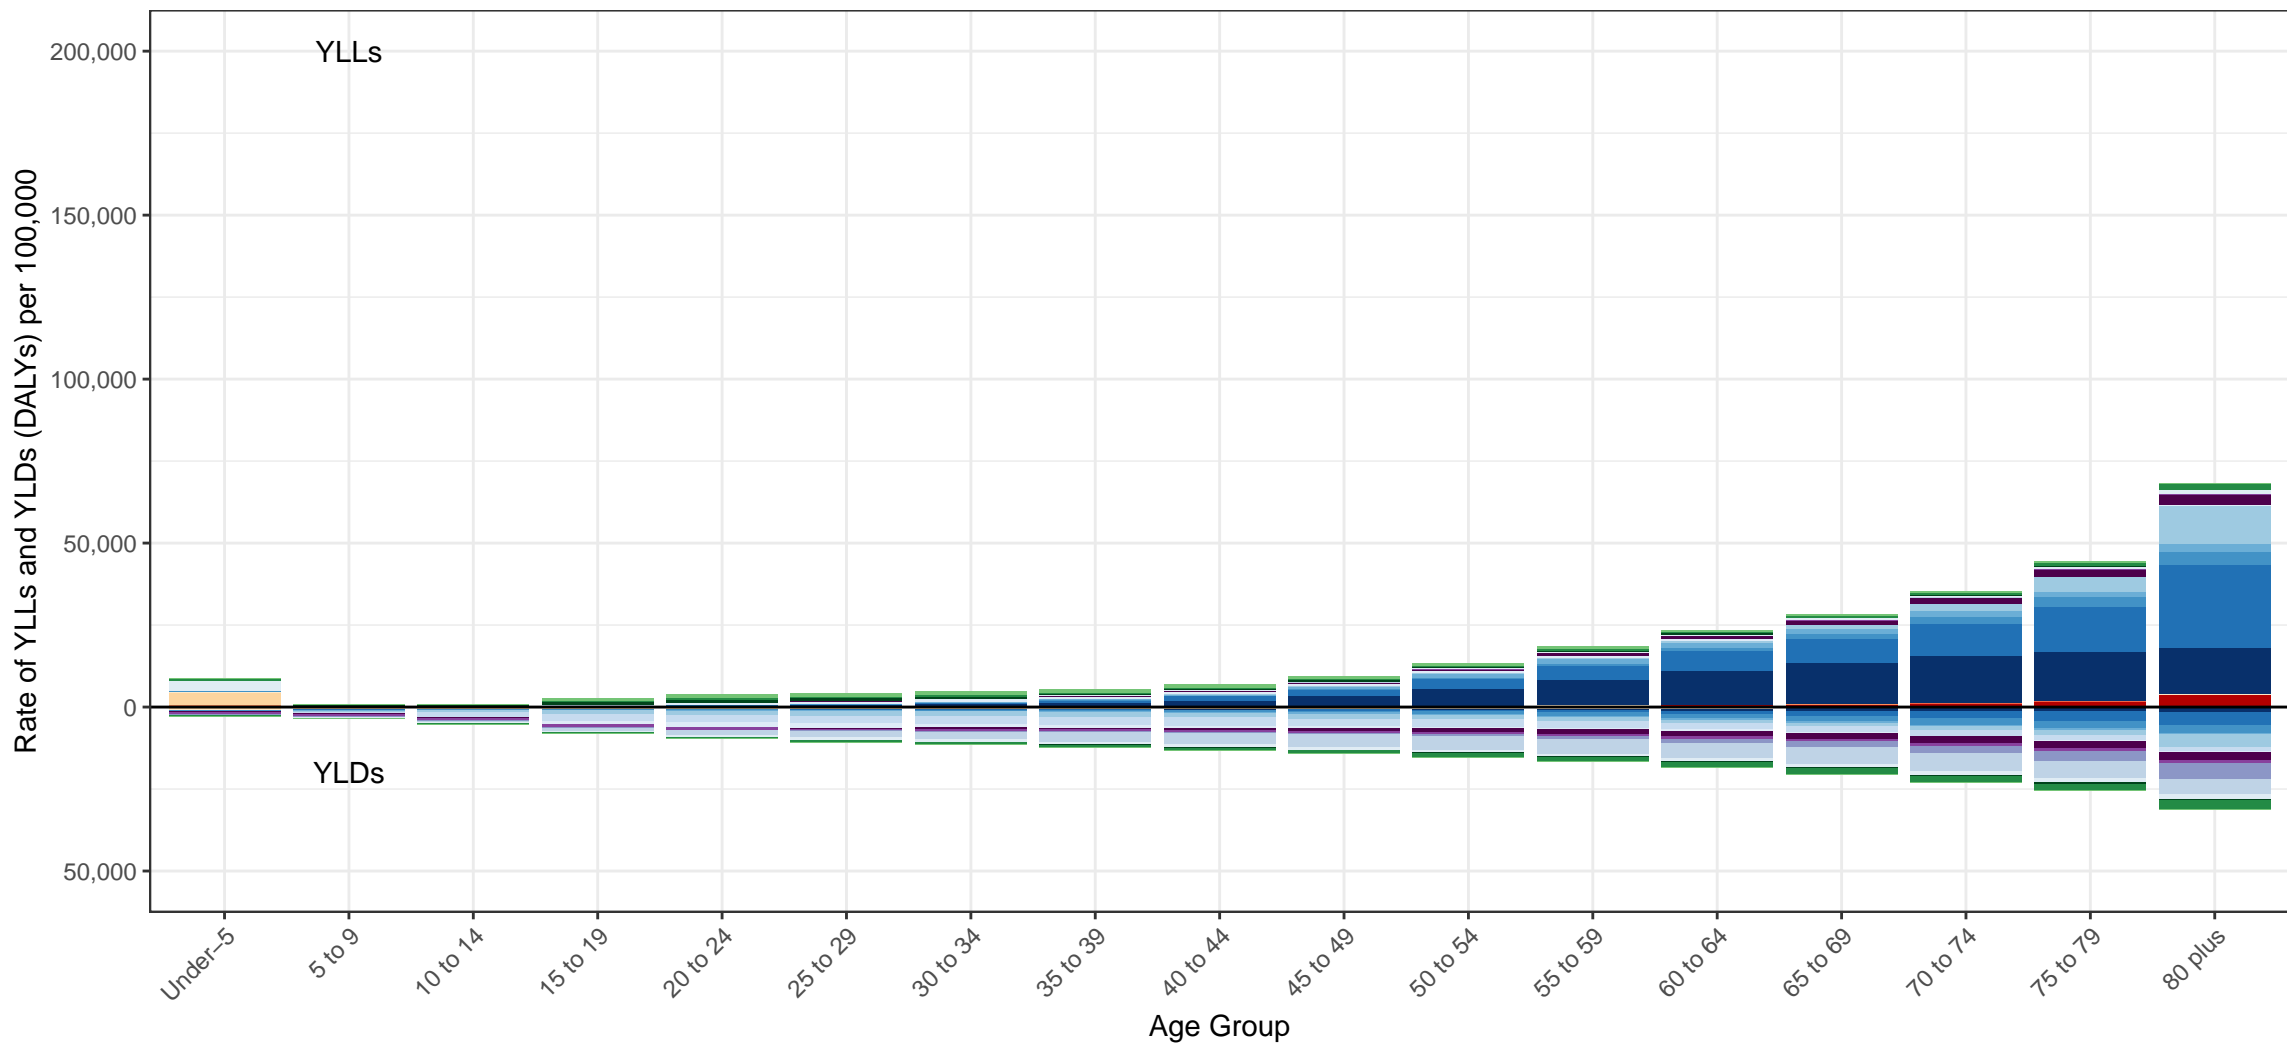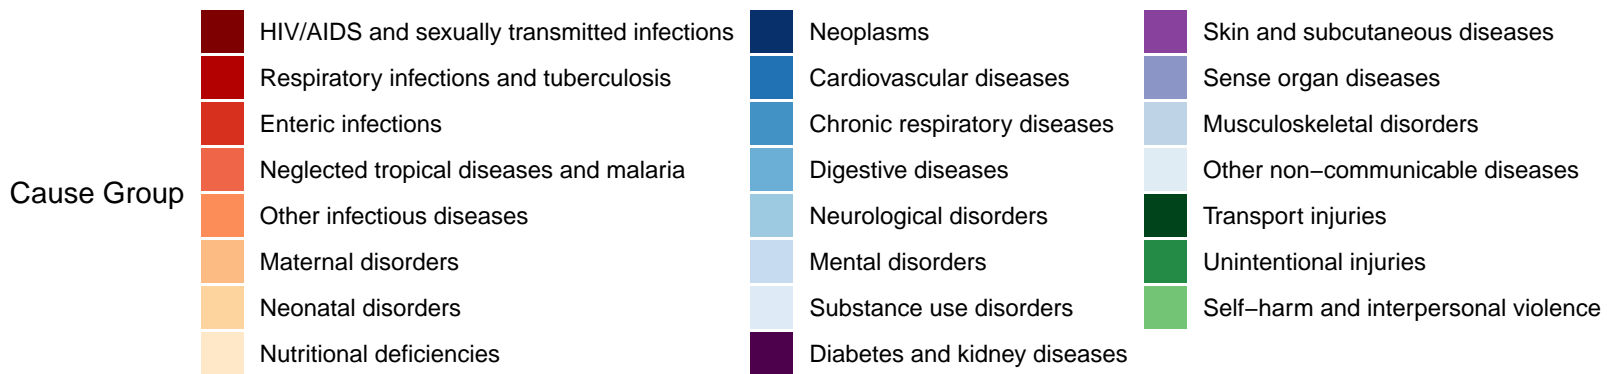

Appendix Figure 5a. Percent of Cause-Specific DALYs by Age, Full Ecological Approach

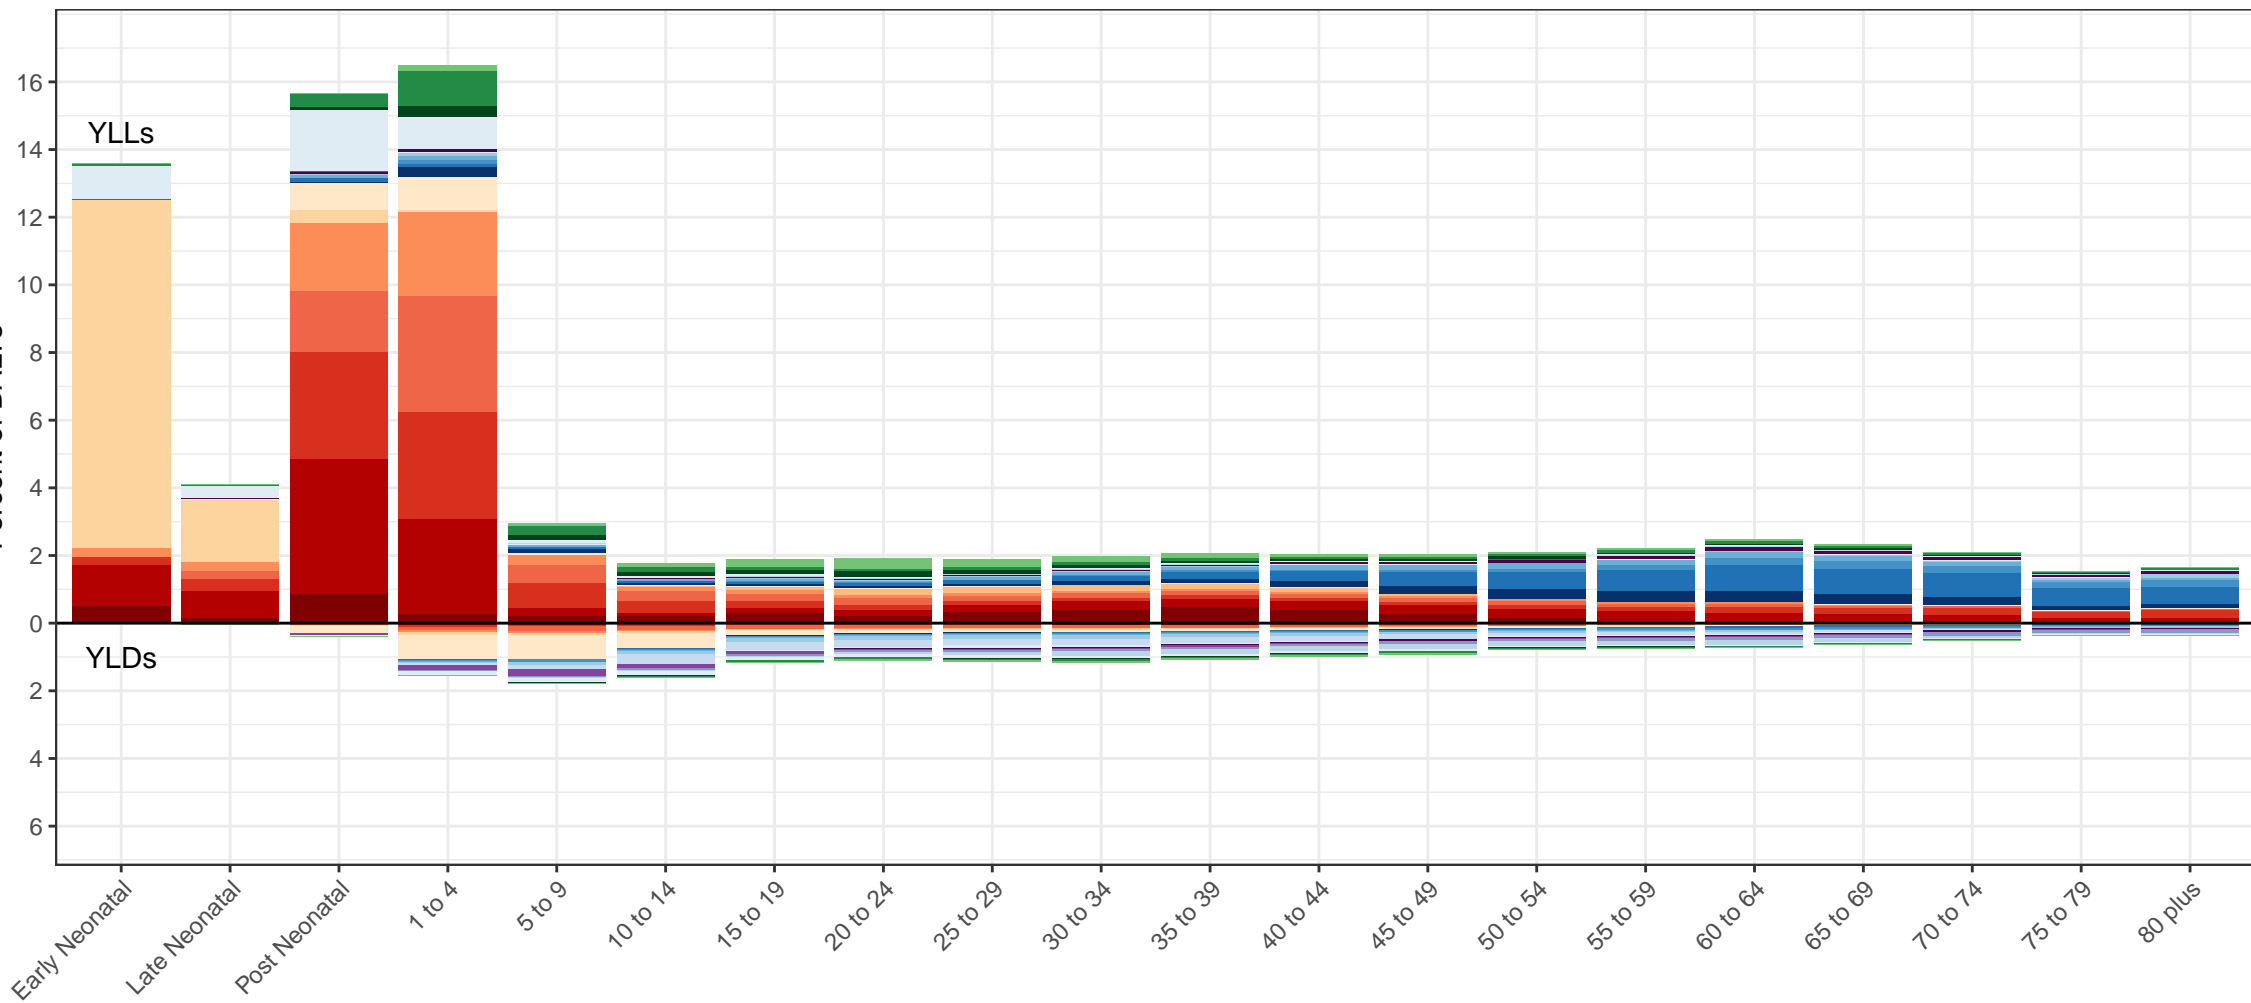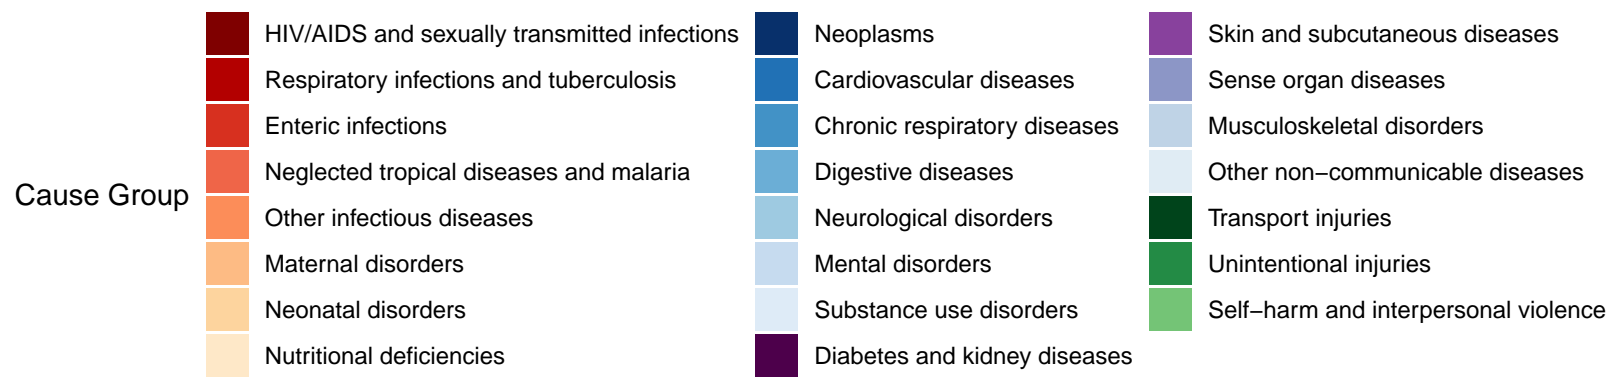

Appendix Figure 5b. Percent Cause-Specific of DALYs by Age, Poorest Billion Aggregation

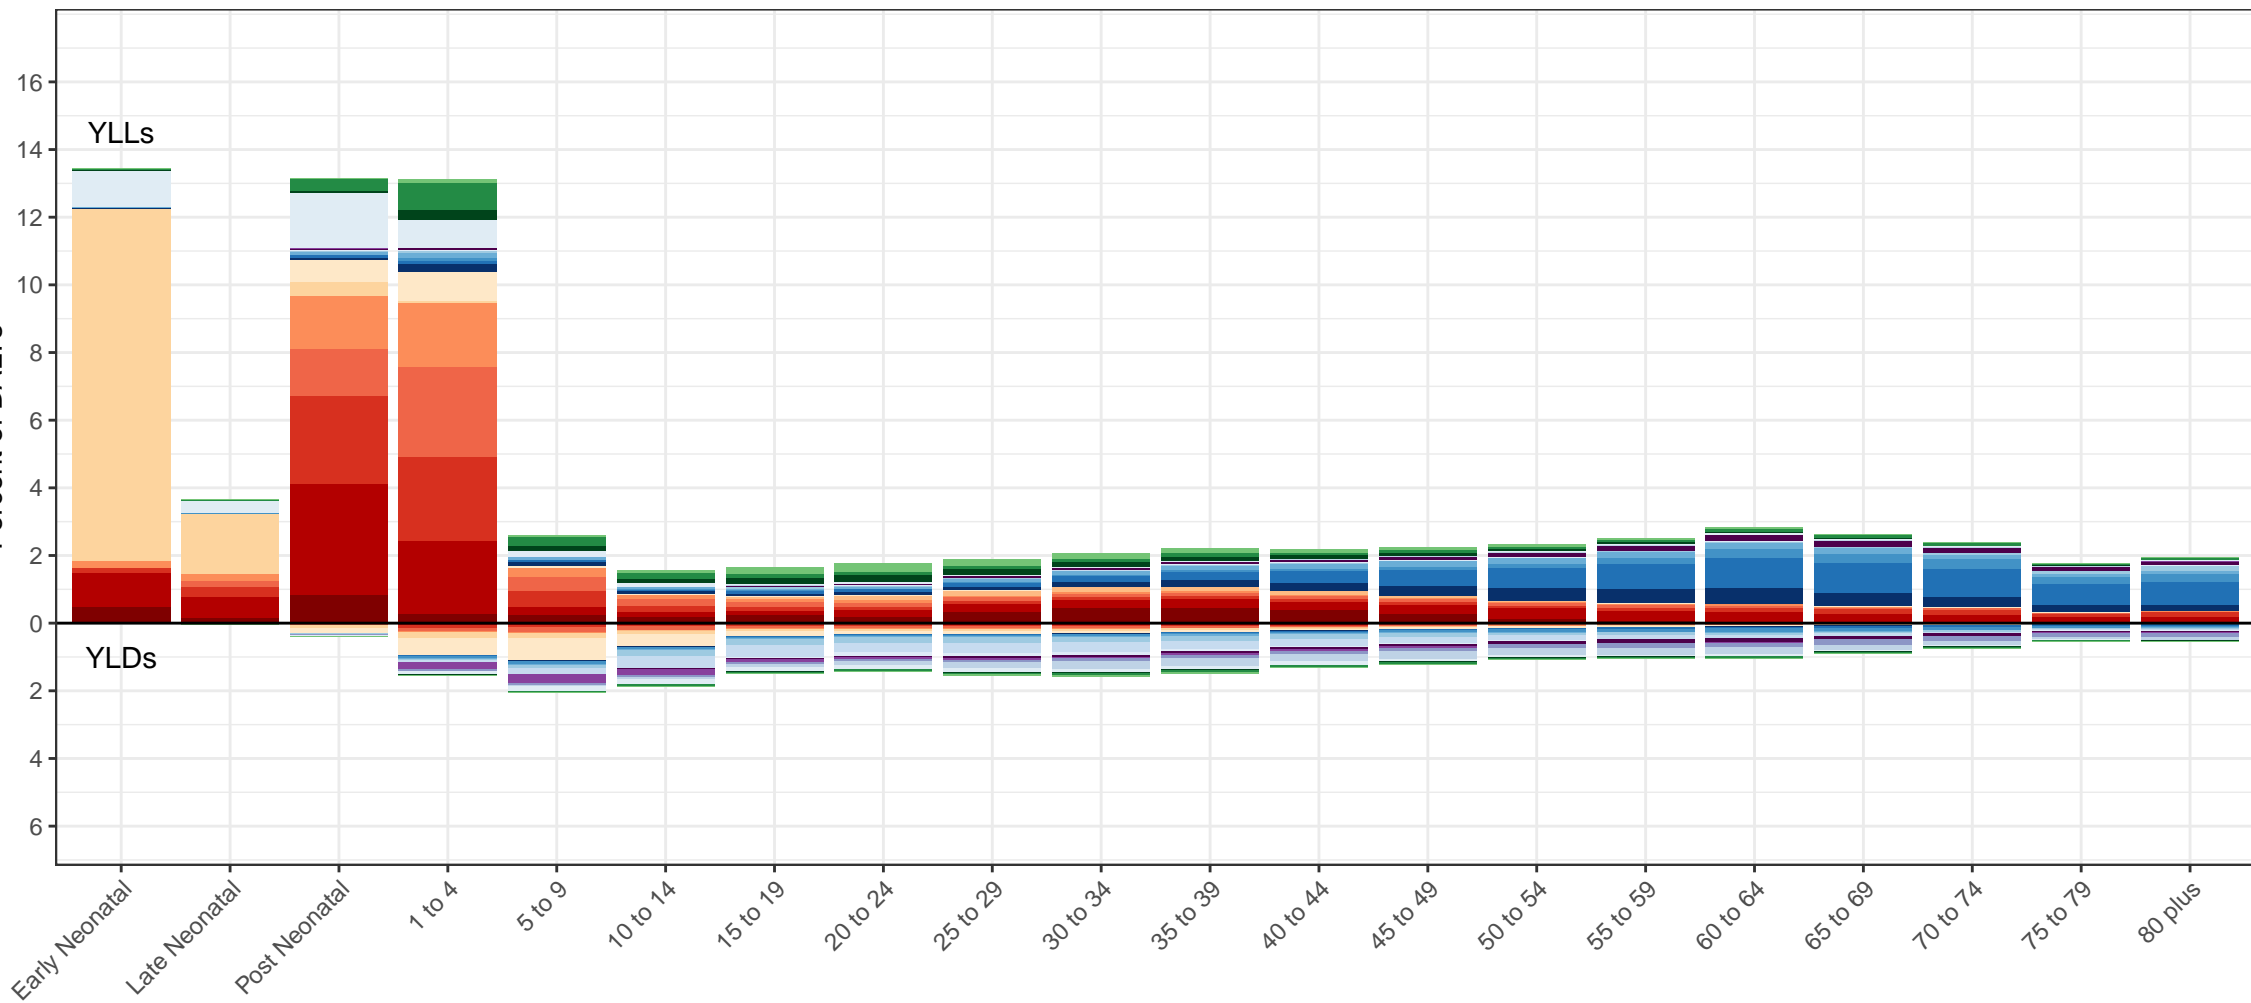

Appendix Figure 5c. Percent Cause-Specific of DALYs by Age, Country Aggregation

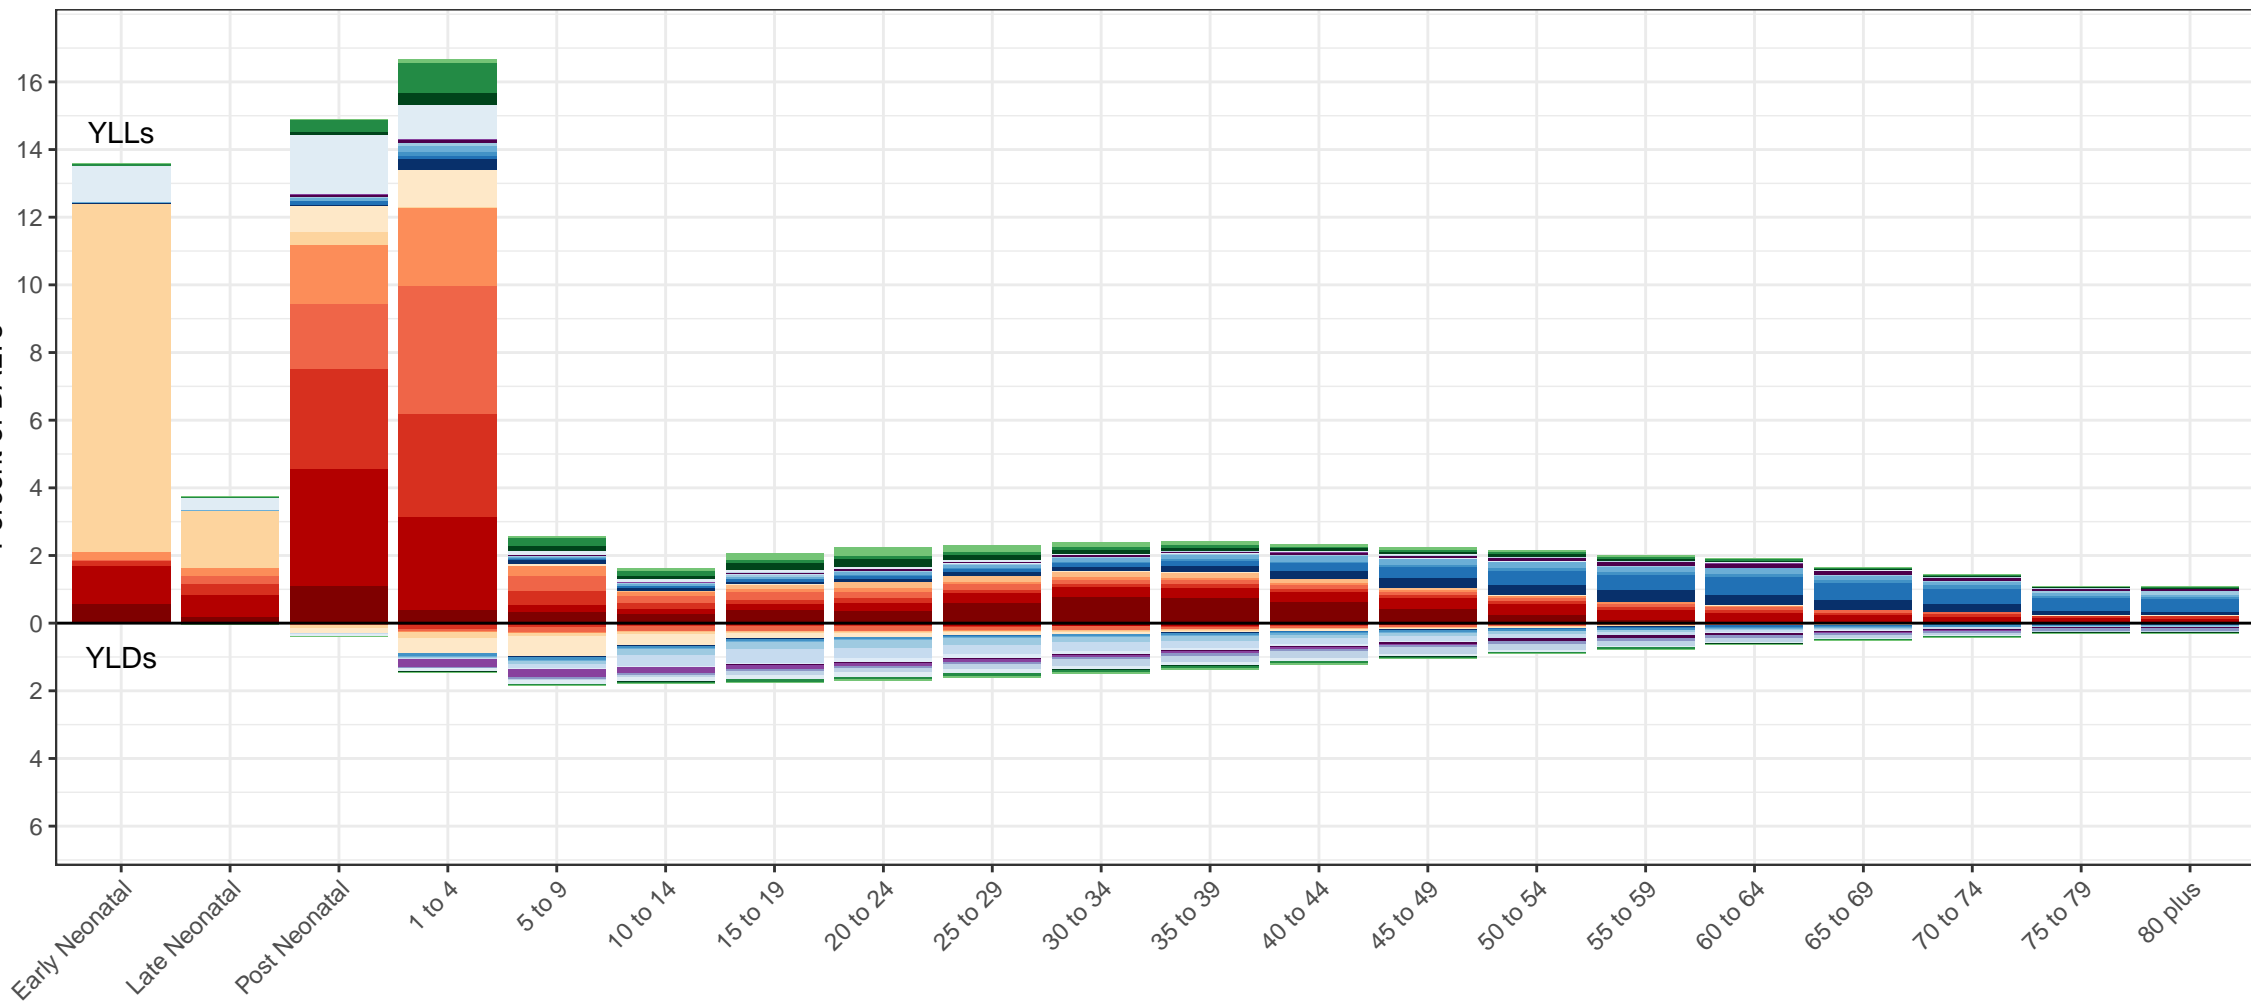

Appendix Figure 5d. Percent of Cause-Specific DALYs by Age, Low-income Countries

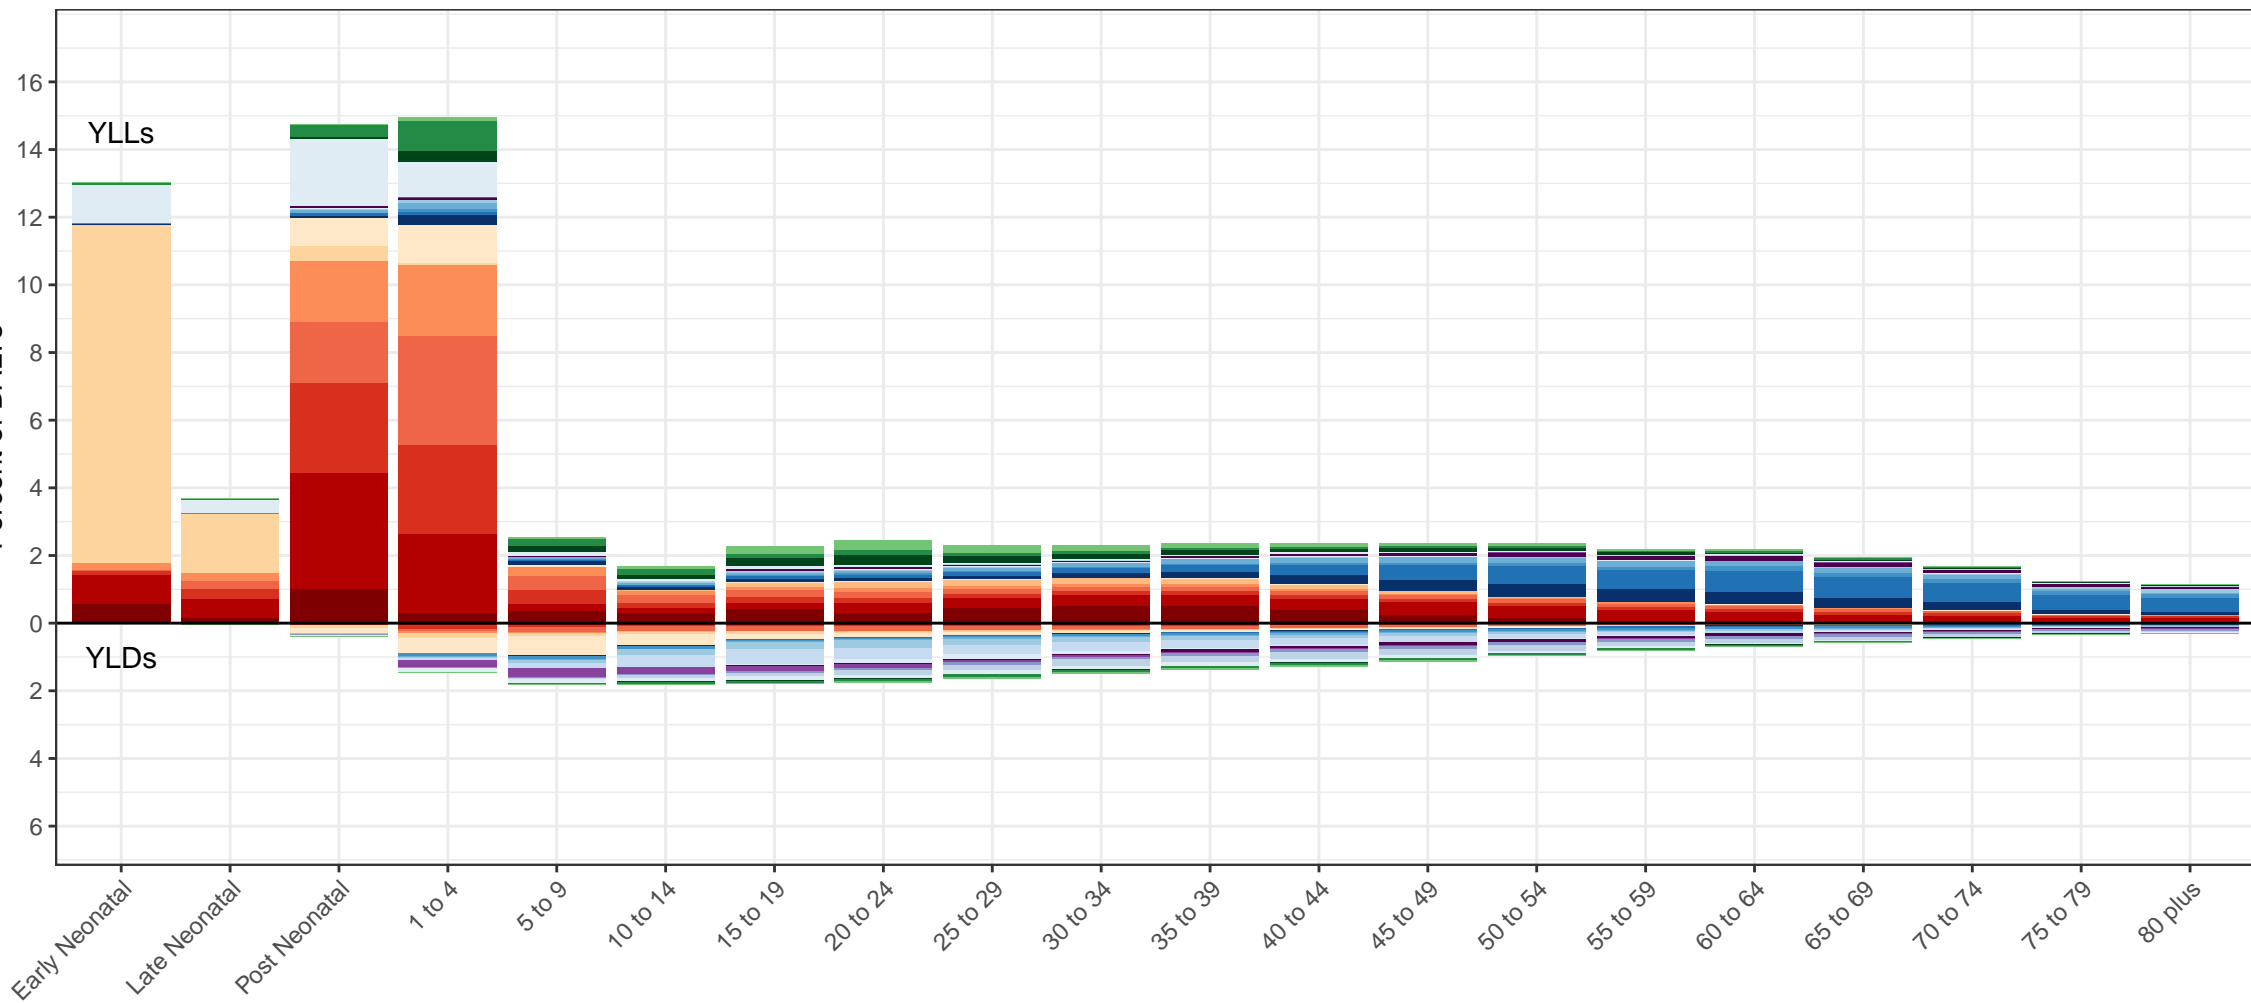

- Cause Group**
- HIV/AIDS and sexually transmitted infections
  - Respiratory infections and tuberculosis
  - Enteric infections
  - Neglected tropical diseases and malaria
  - Other infectious diseases
  - Maternal disorders
  - Neonatal disorders
  - Nutritional deficiencies
  - Neoplasms
  - Cardiovascular diseases
  - Chronic respiratory diseases
  - Digestive diseases
  - Neurological disorders
  - Mental disorders
  - Substance use disorders
  - Diabetes and kidney diseases
  - Skin and subcutaneous diseases
  - Sense organ diseases
  - Musculoskeletal disorders
  - Other non-communicable diseases
  - Transport injuries
  - Unintentional injuries
  - Self-harm and interpersonal violence



Appendix Figure 5e. Percent of Cause-Specific DALYs by Age, Lower-middle-income Countries

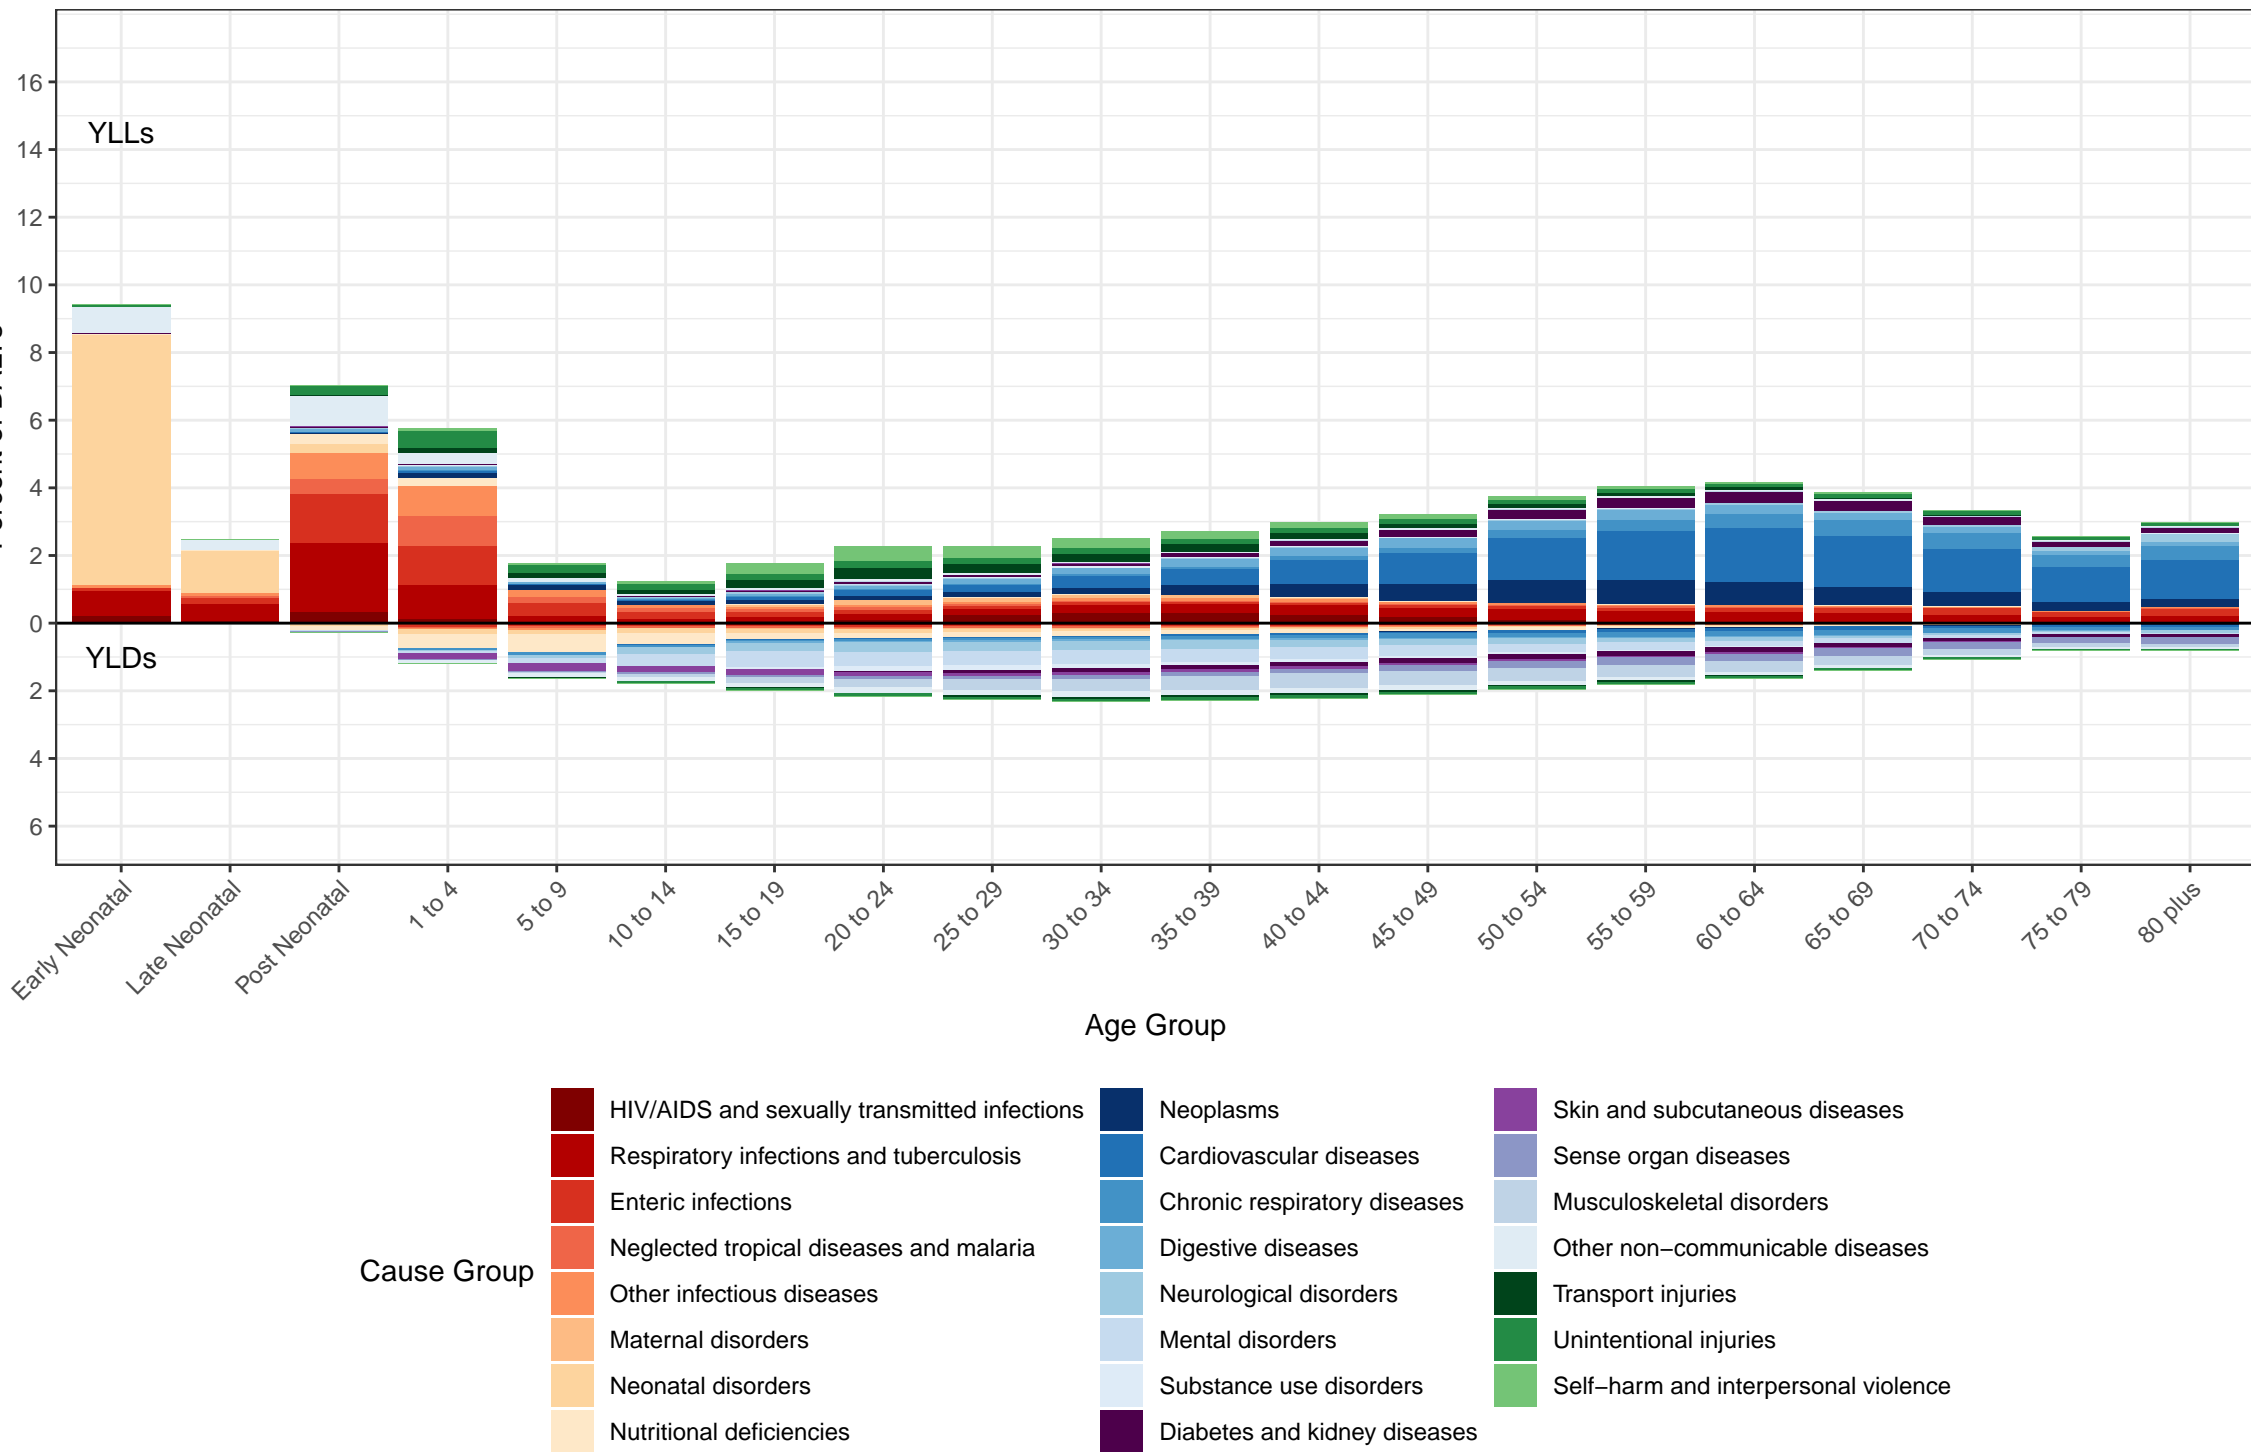



Appendix Figure 5g. Percent of Cause-Specific DALYs by Age, High-income Countries

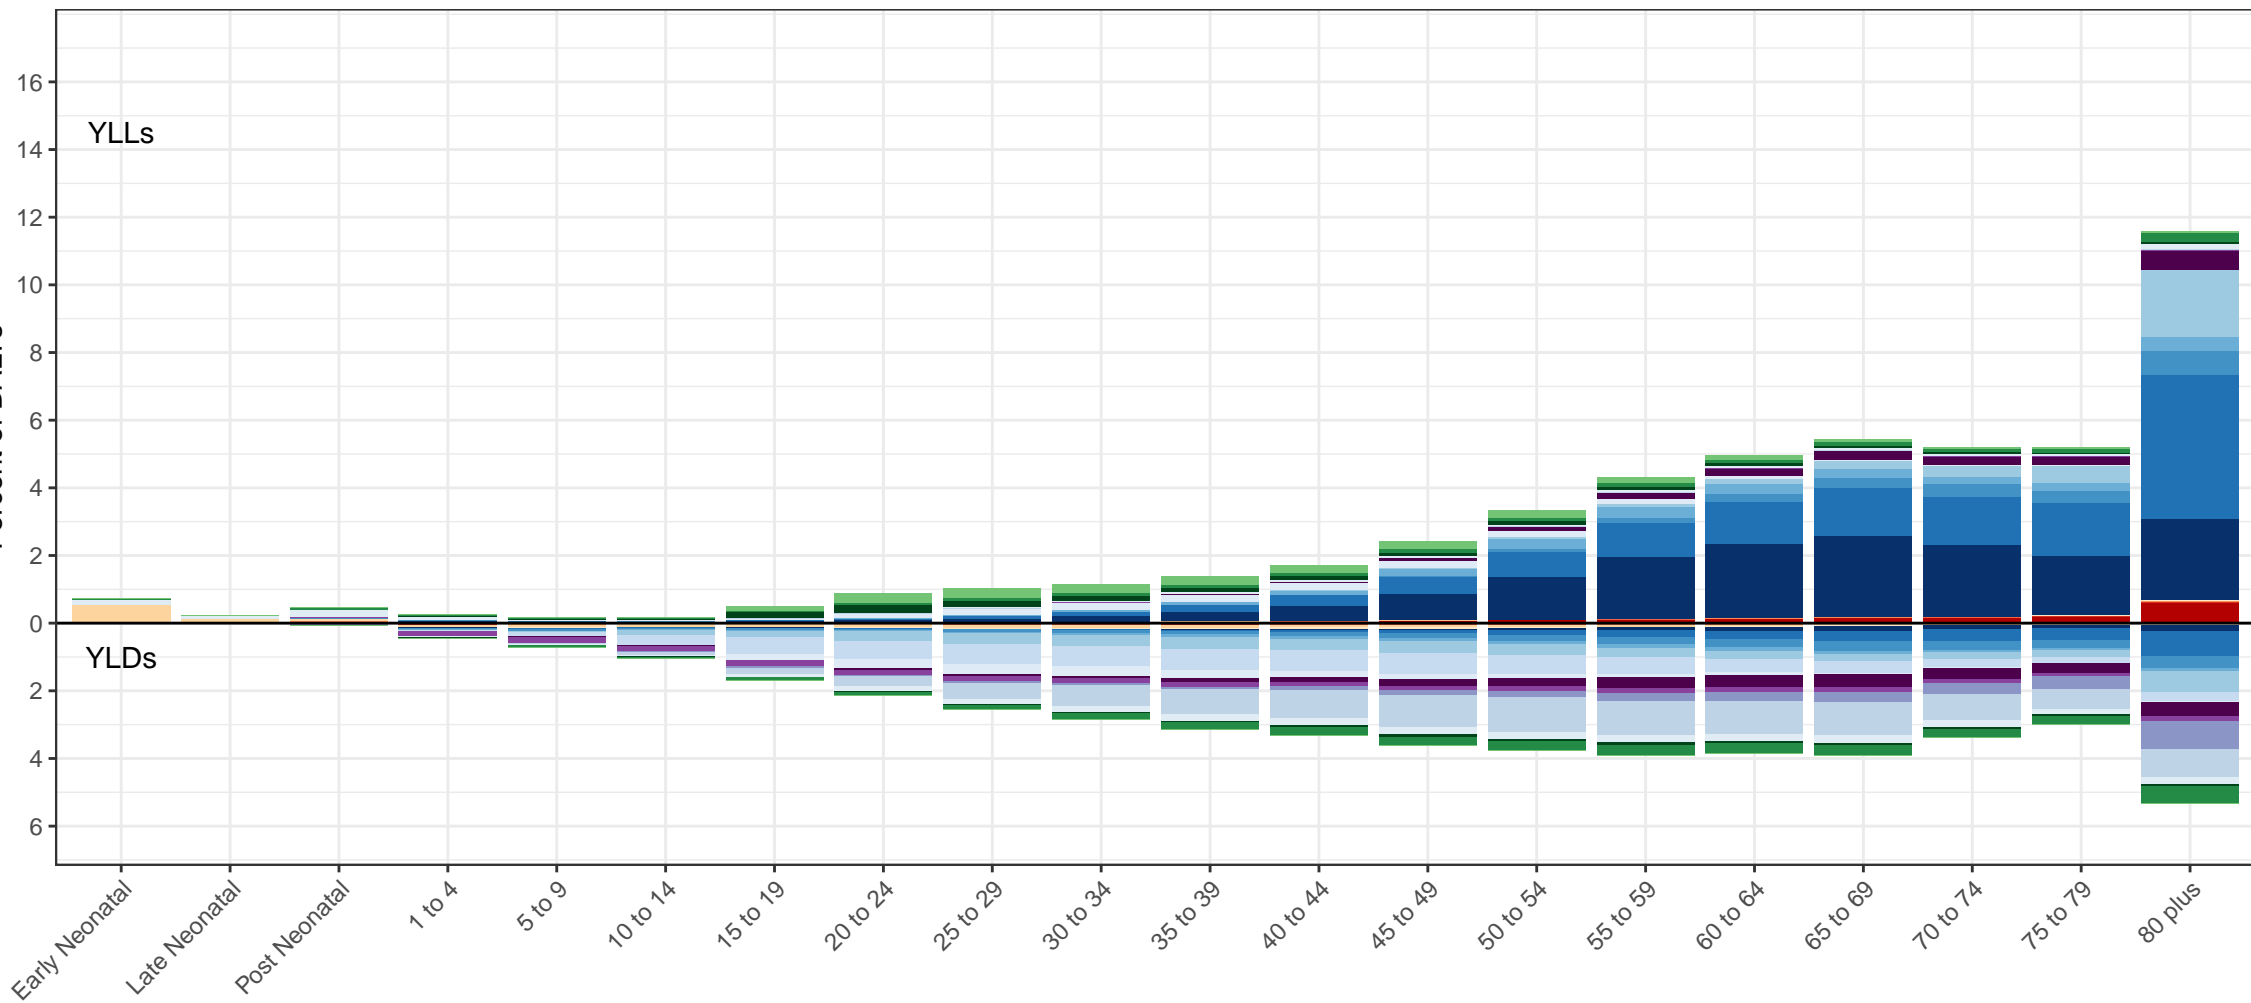

Appendix Figure 6a. Difference between Crude DALY Rates in Poorest Billion and High-income Regions, Full Ecological Approach

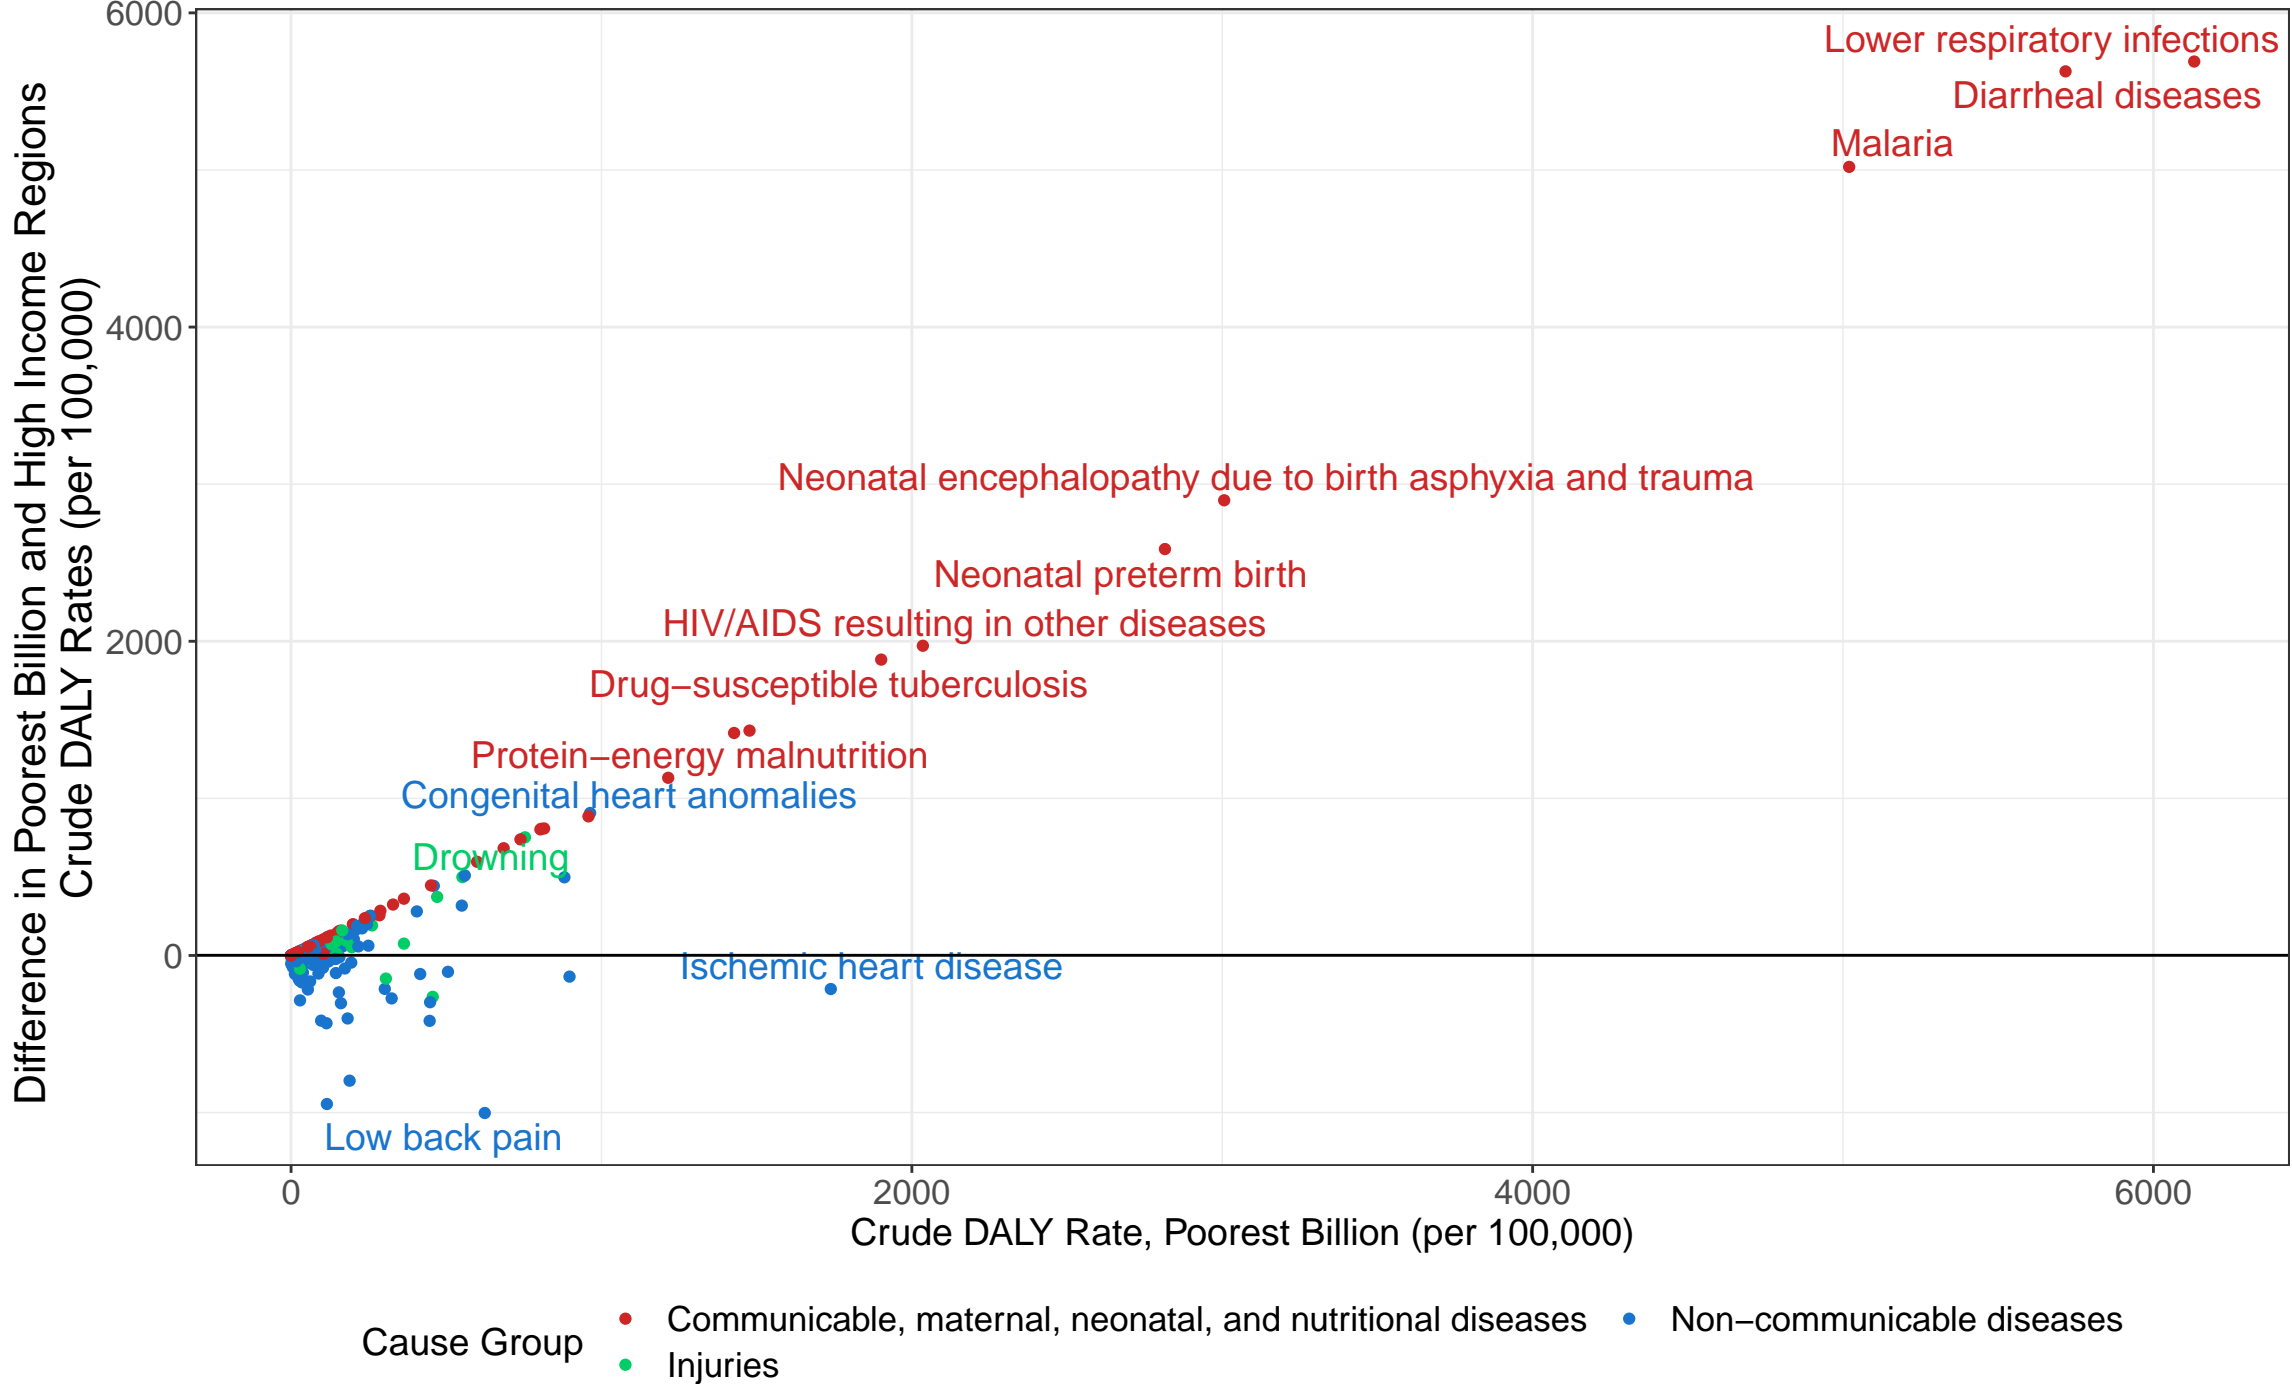

Appendix Figure 6b. Difference between Age-standardized DALY Rates in Poorest Billion and High-income Regions, Full Ecological Approach

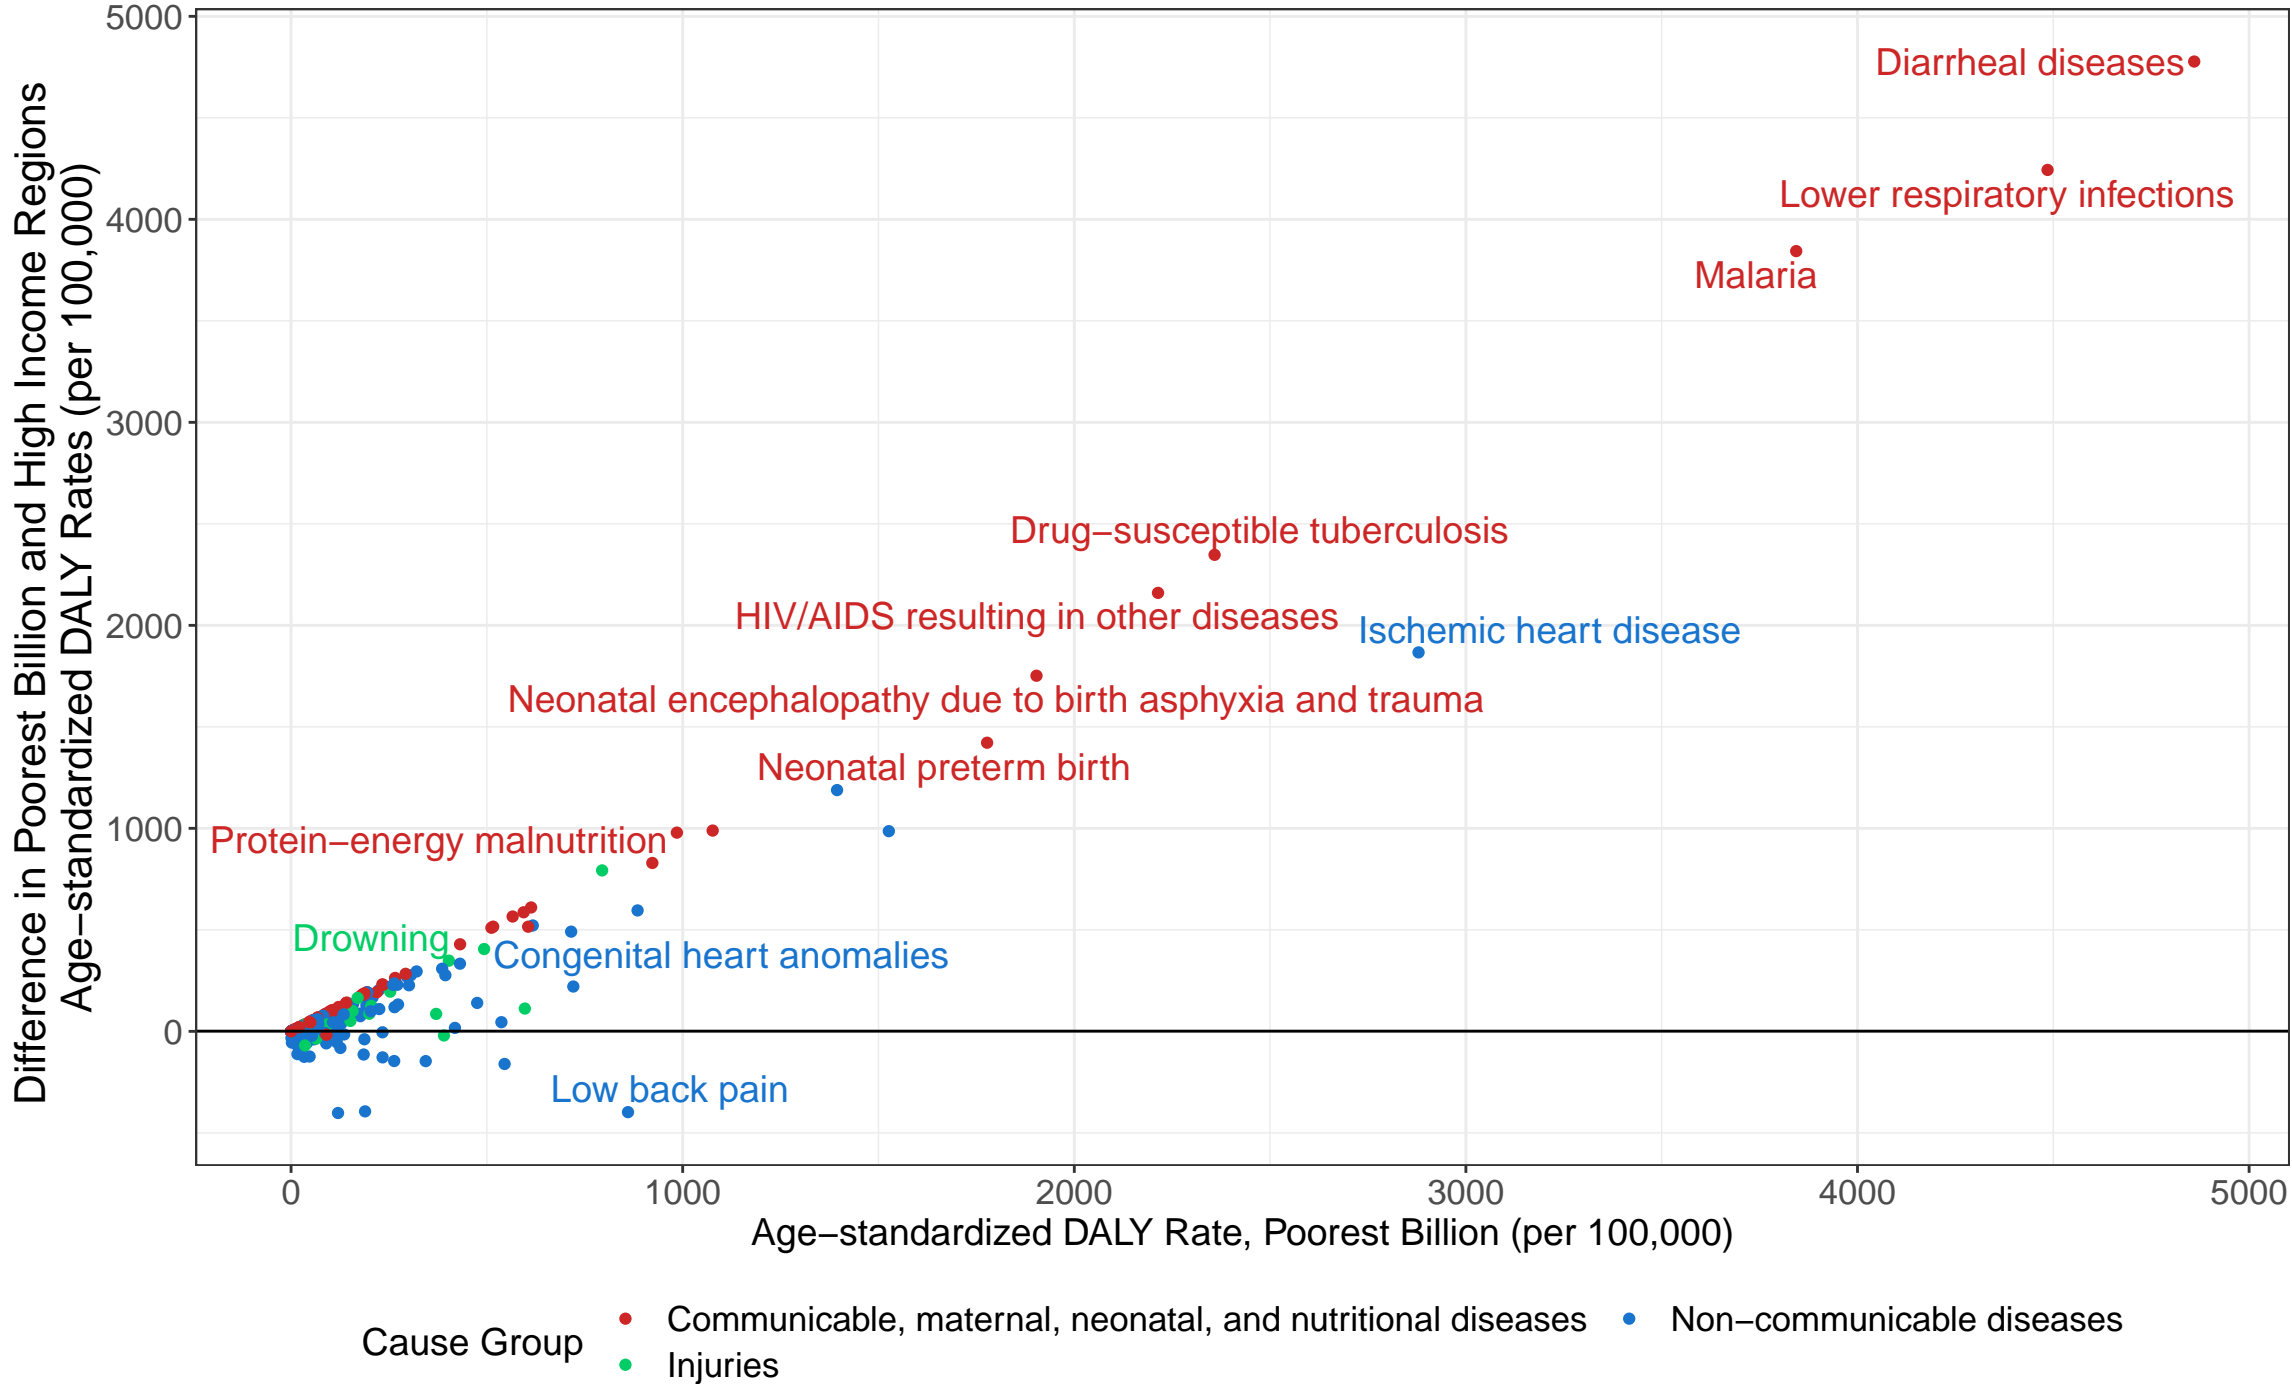

Appendix Figure 6c. Difference between Crude DALY Rates in Poorest Billion and High-income Regions, Poorest Billion Aggregation

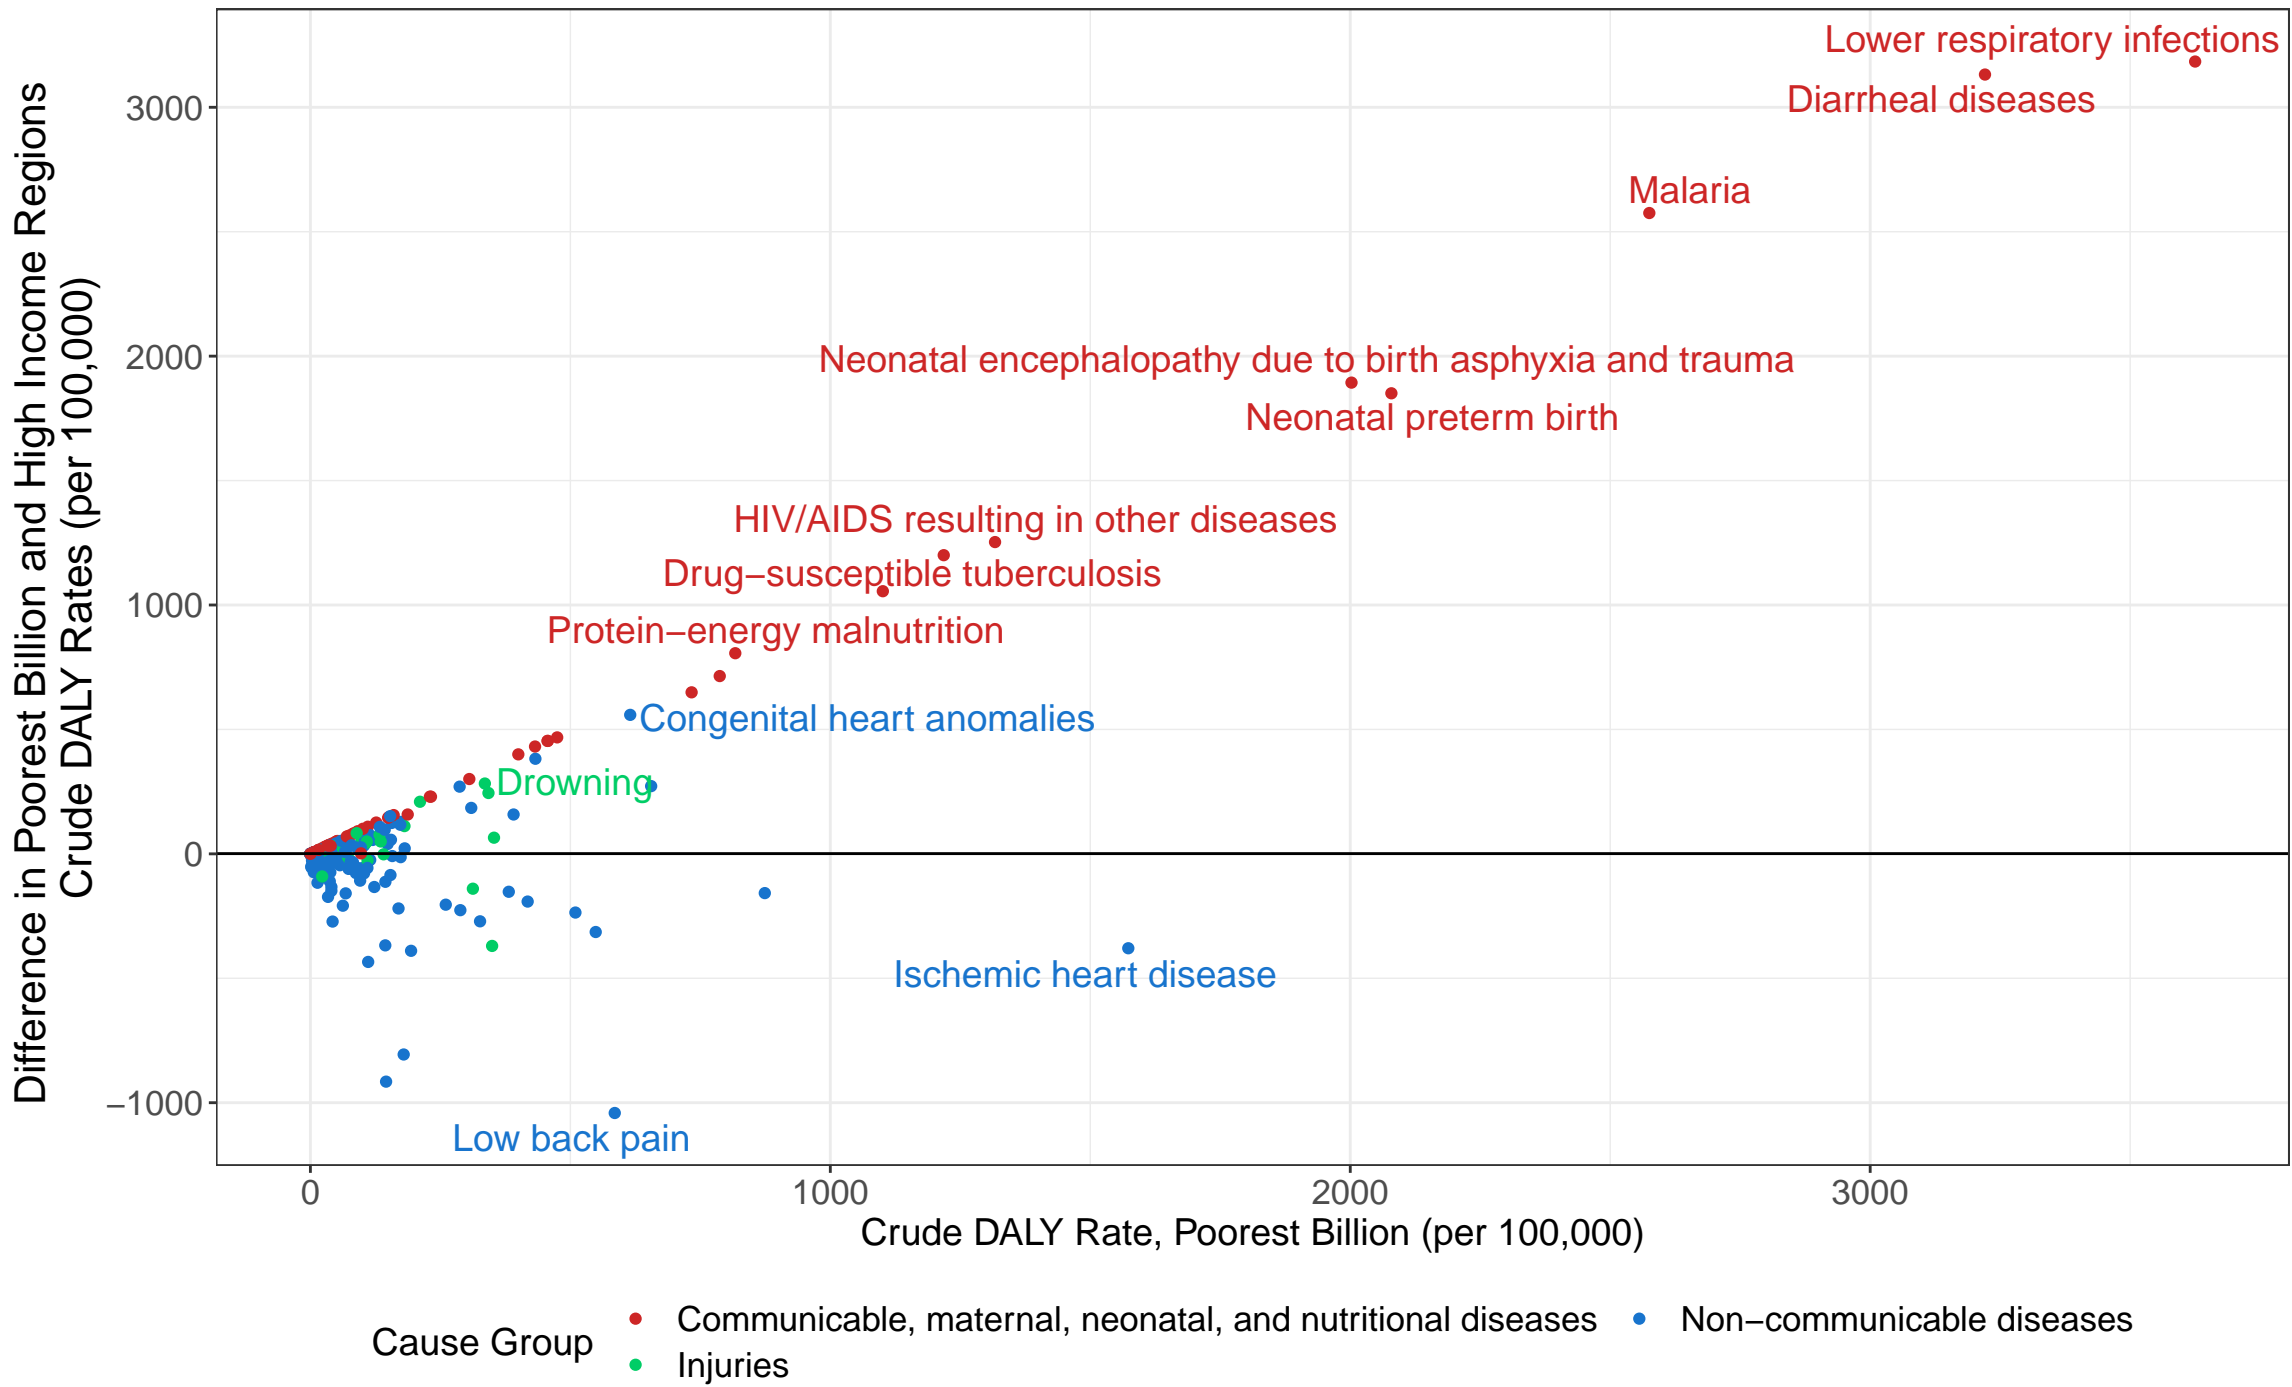



Appendix Figure 6e. Difference between Crude DALY Rates in Poorest Billion and High-income Regions, Country Aggregation

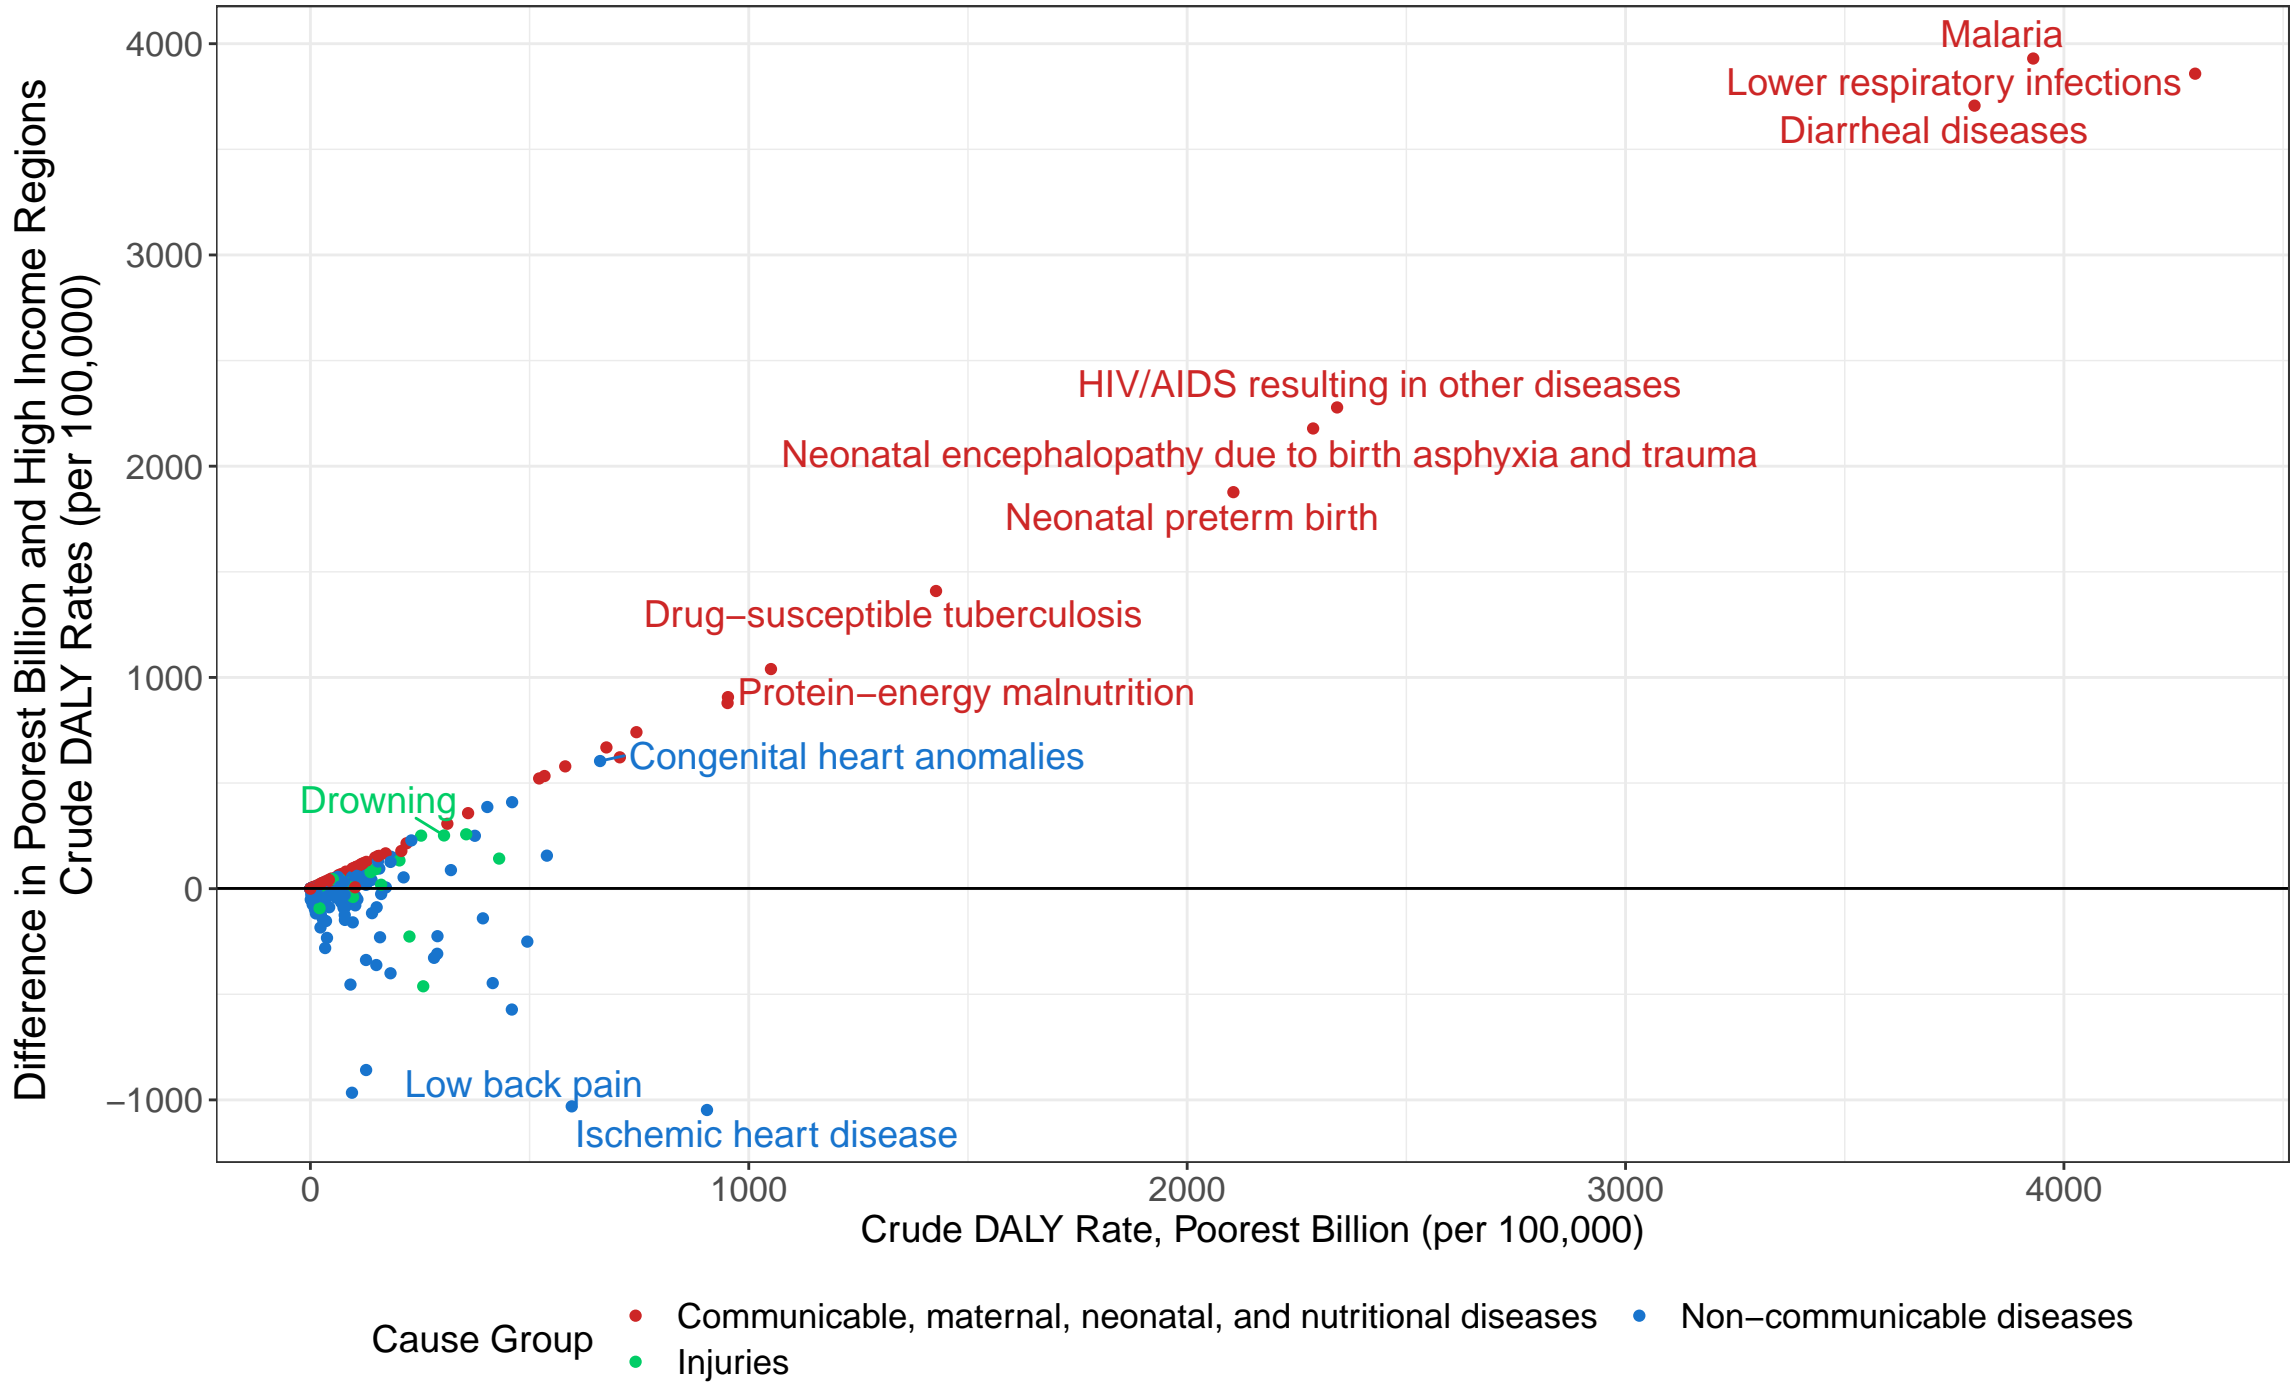



Appendix Figure 6f. Difference between Age-standardized DALY Rates in Poorest Billion and High-income Regions, Country Aggregation

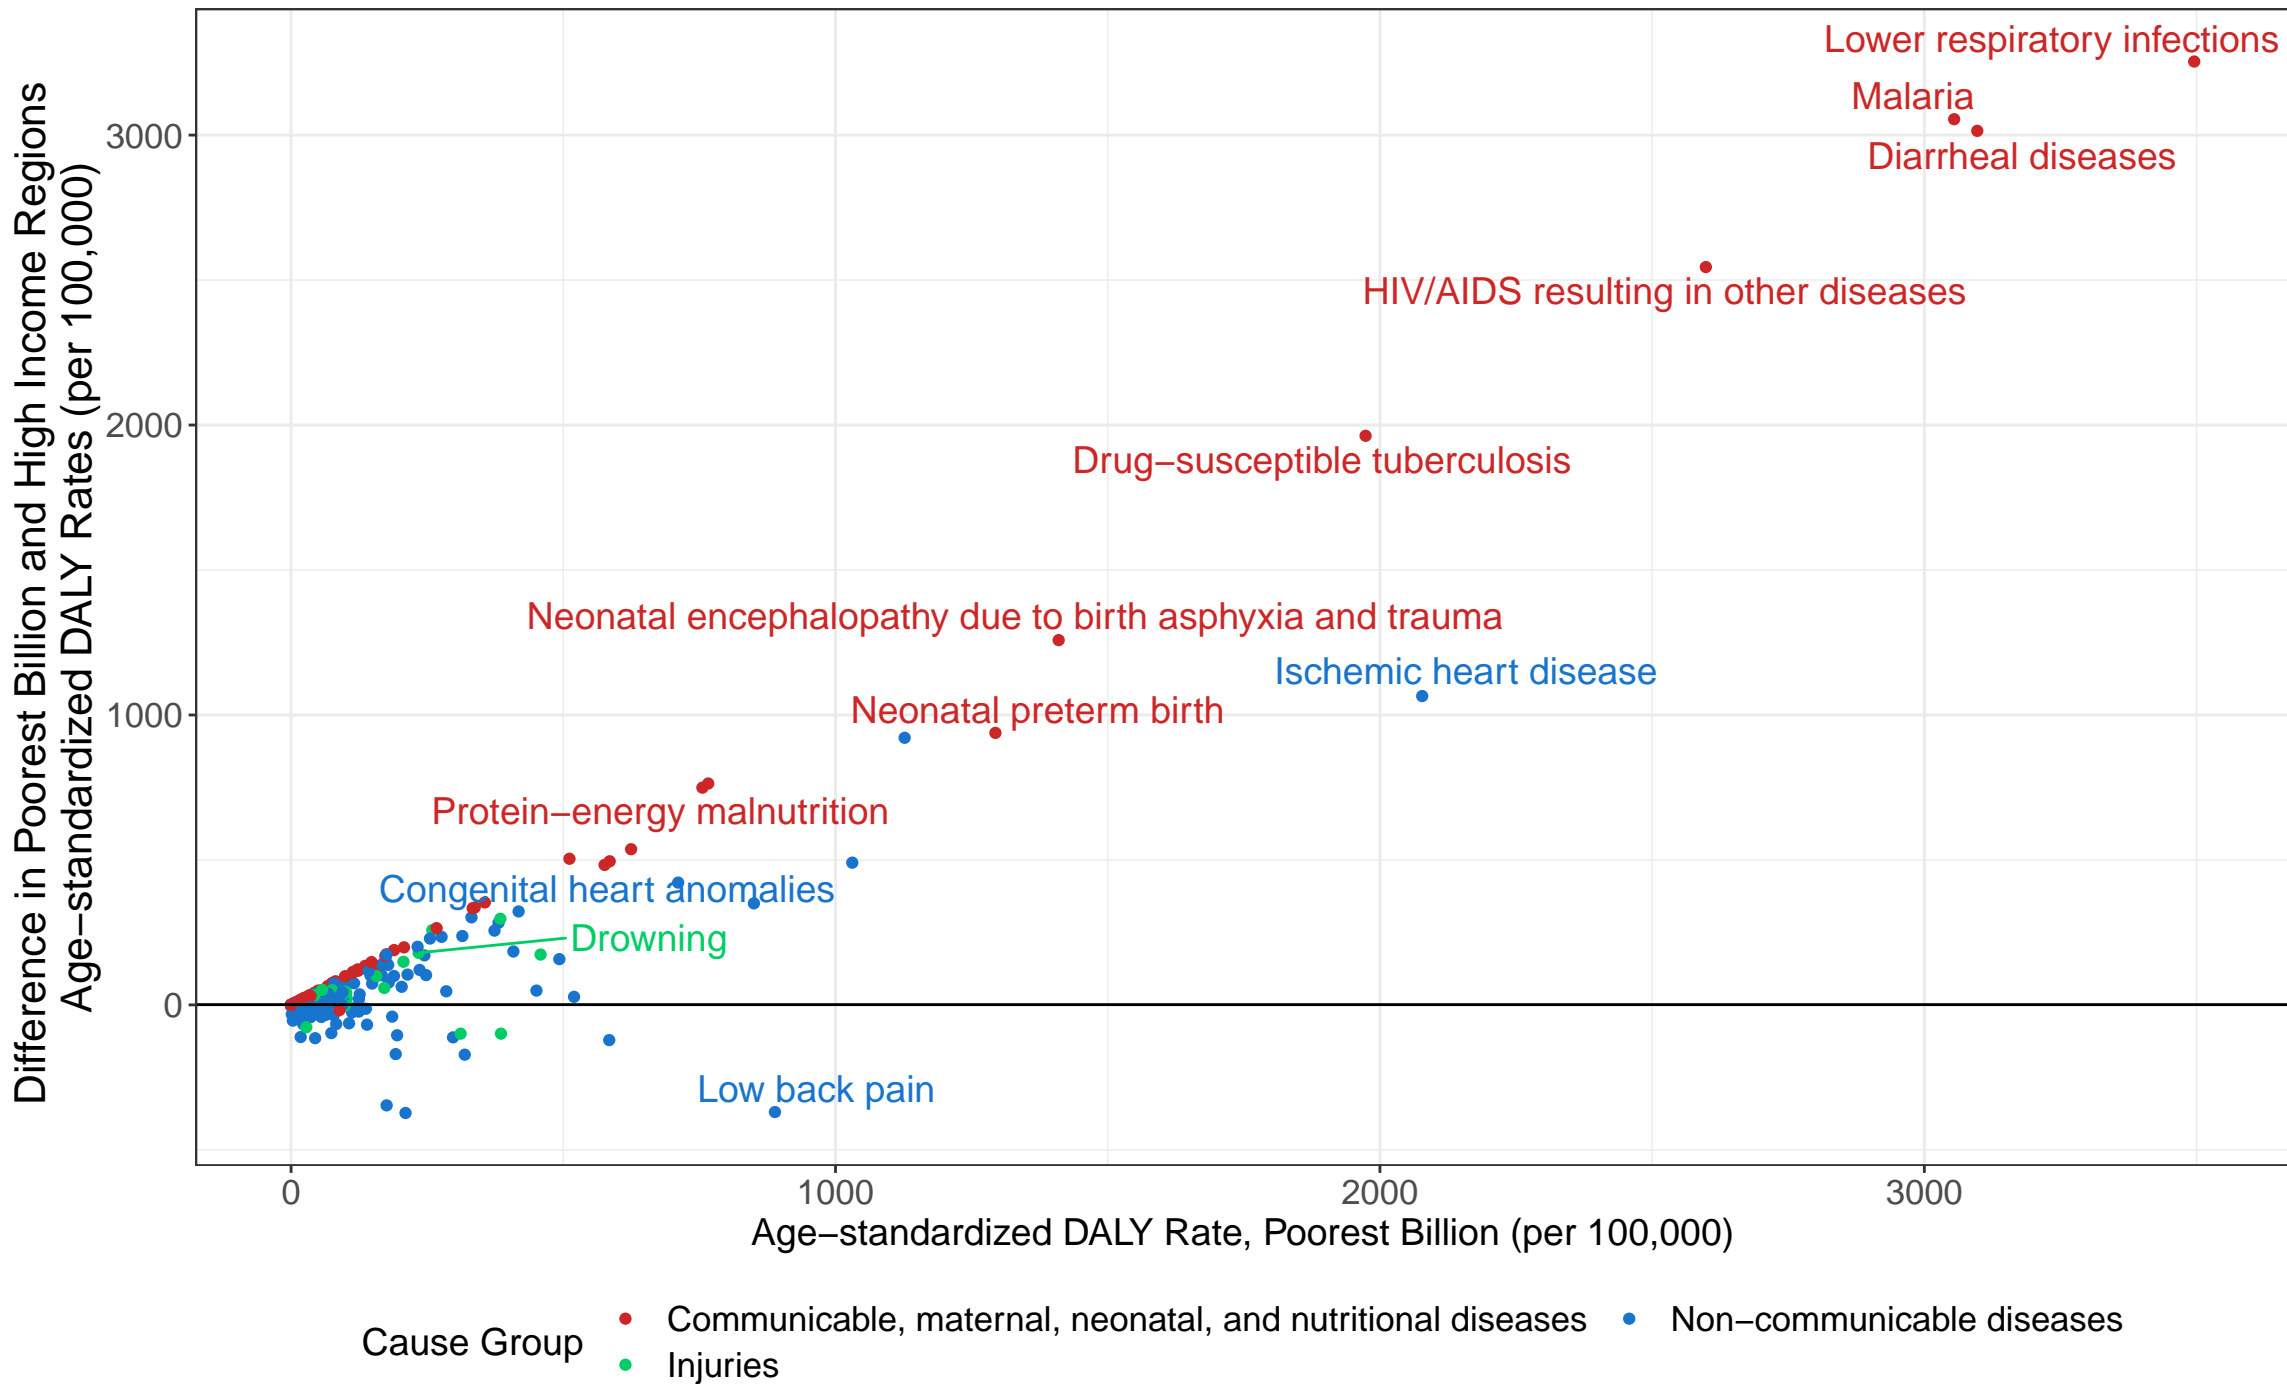

Appendix Figure 6g. Difference between Crude DALY Rates in Low-income and High-income Regions

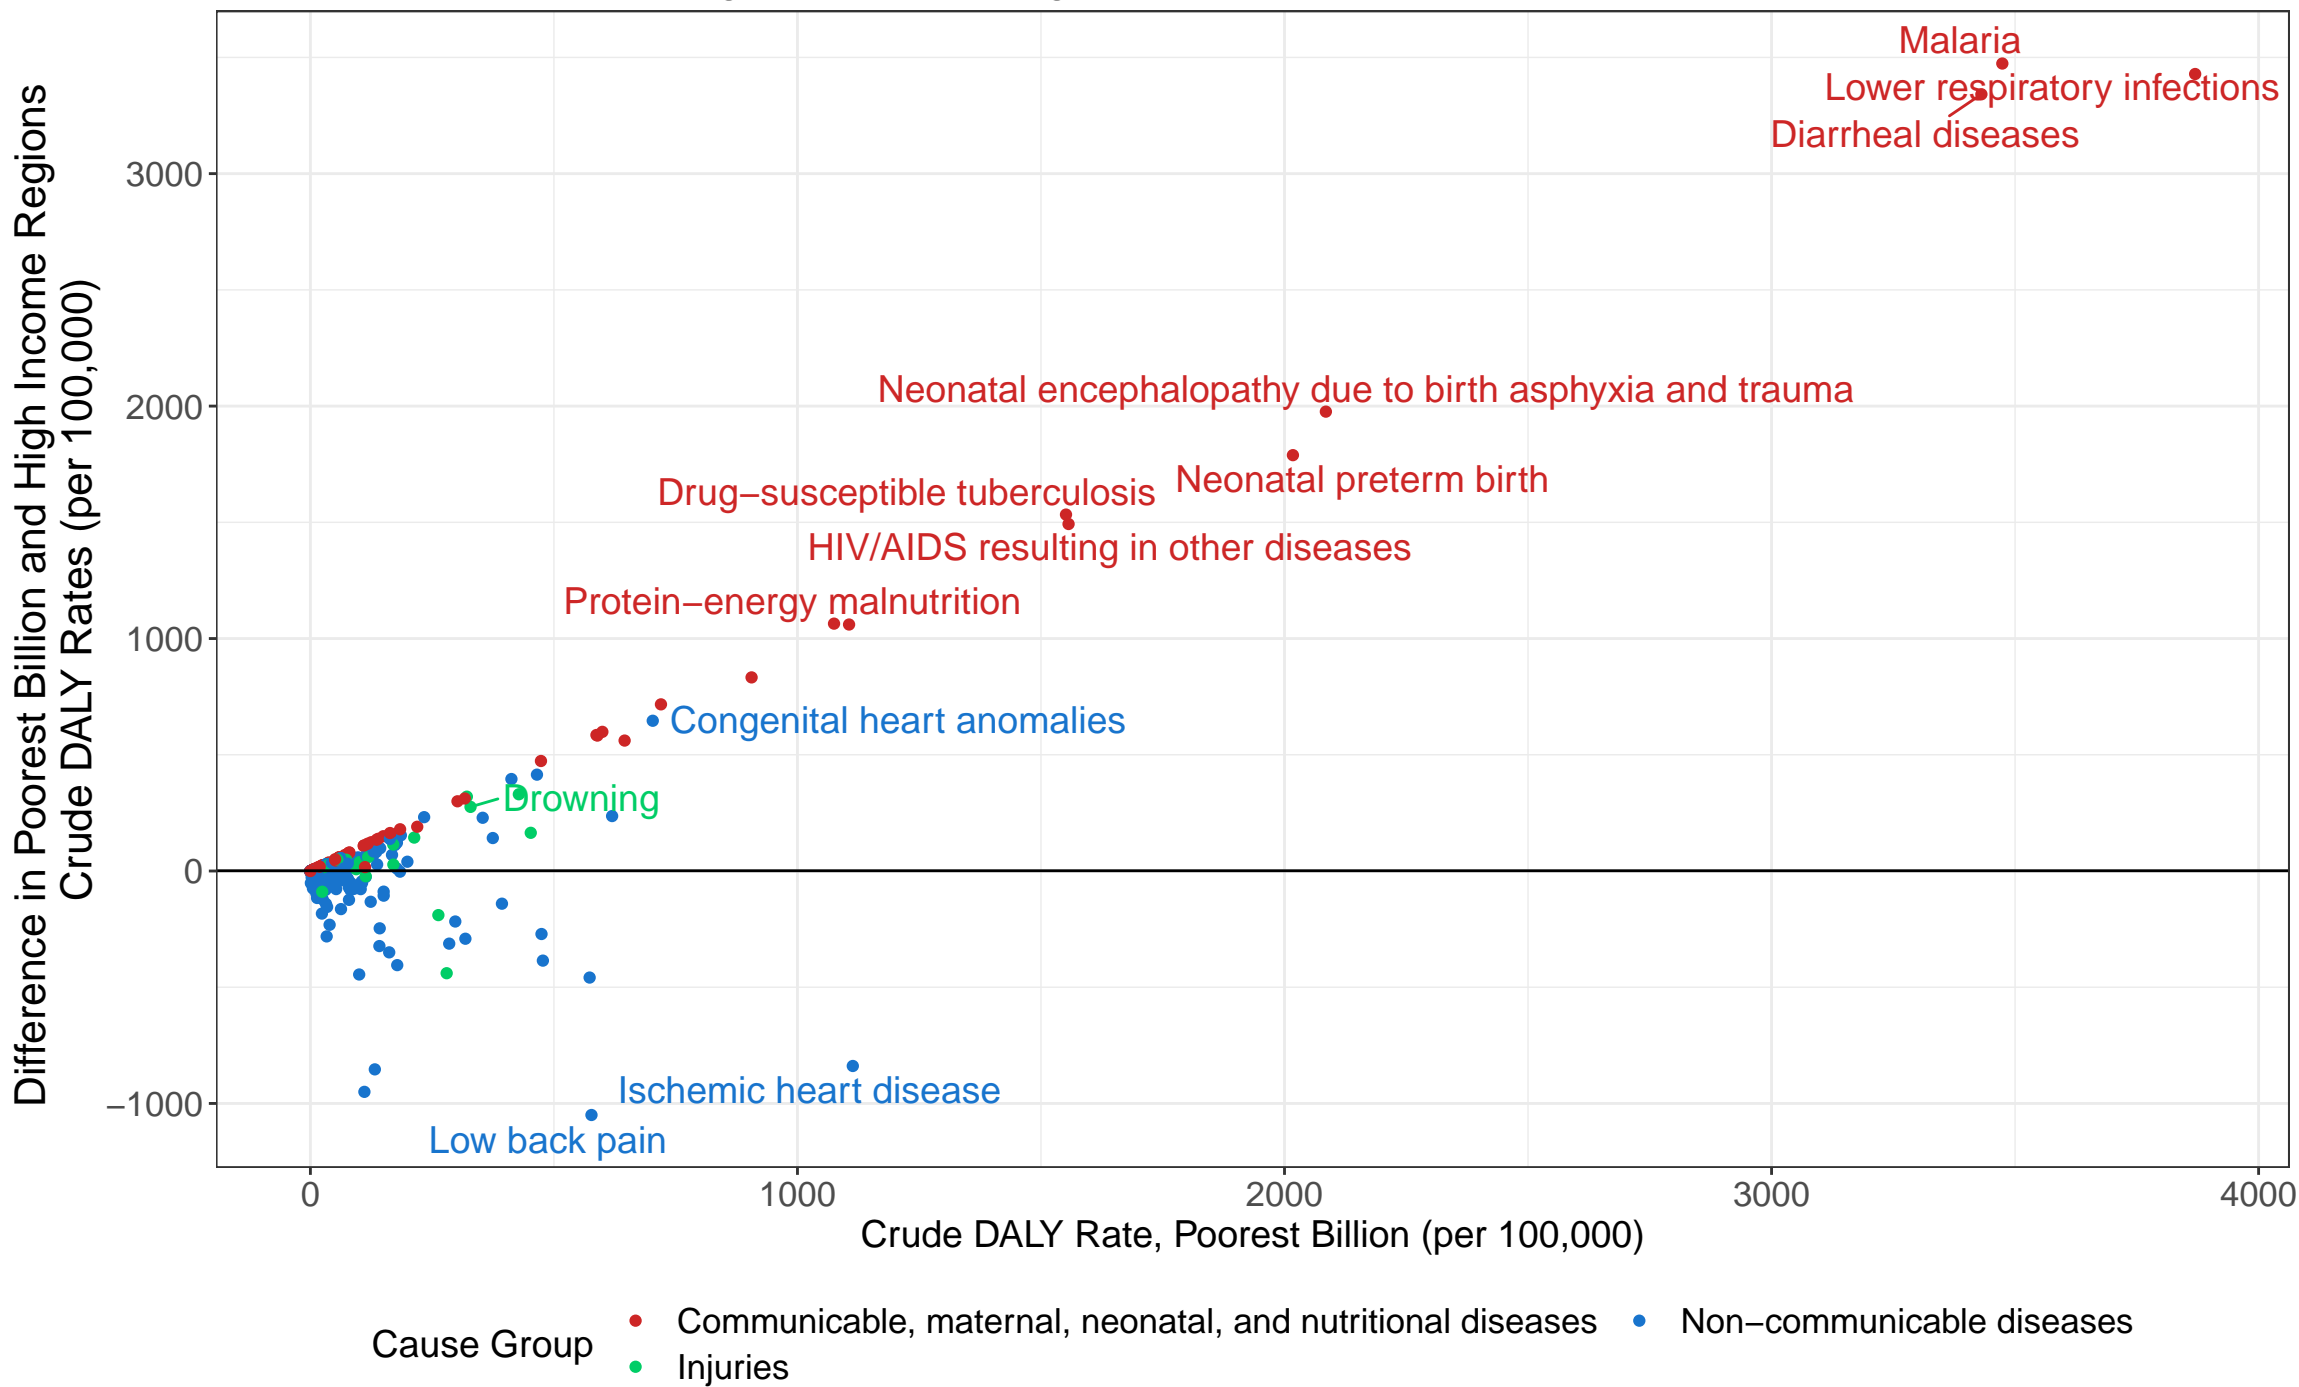

Appendix Figure 6h. Difference between Age-standardized DALY Rates in Low-income and High-income Regions

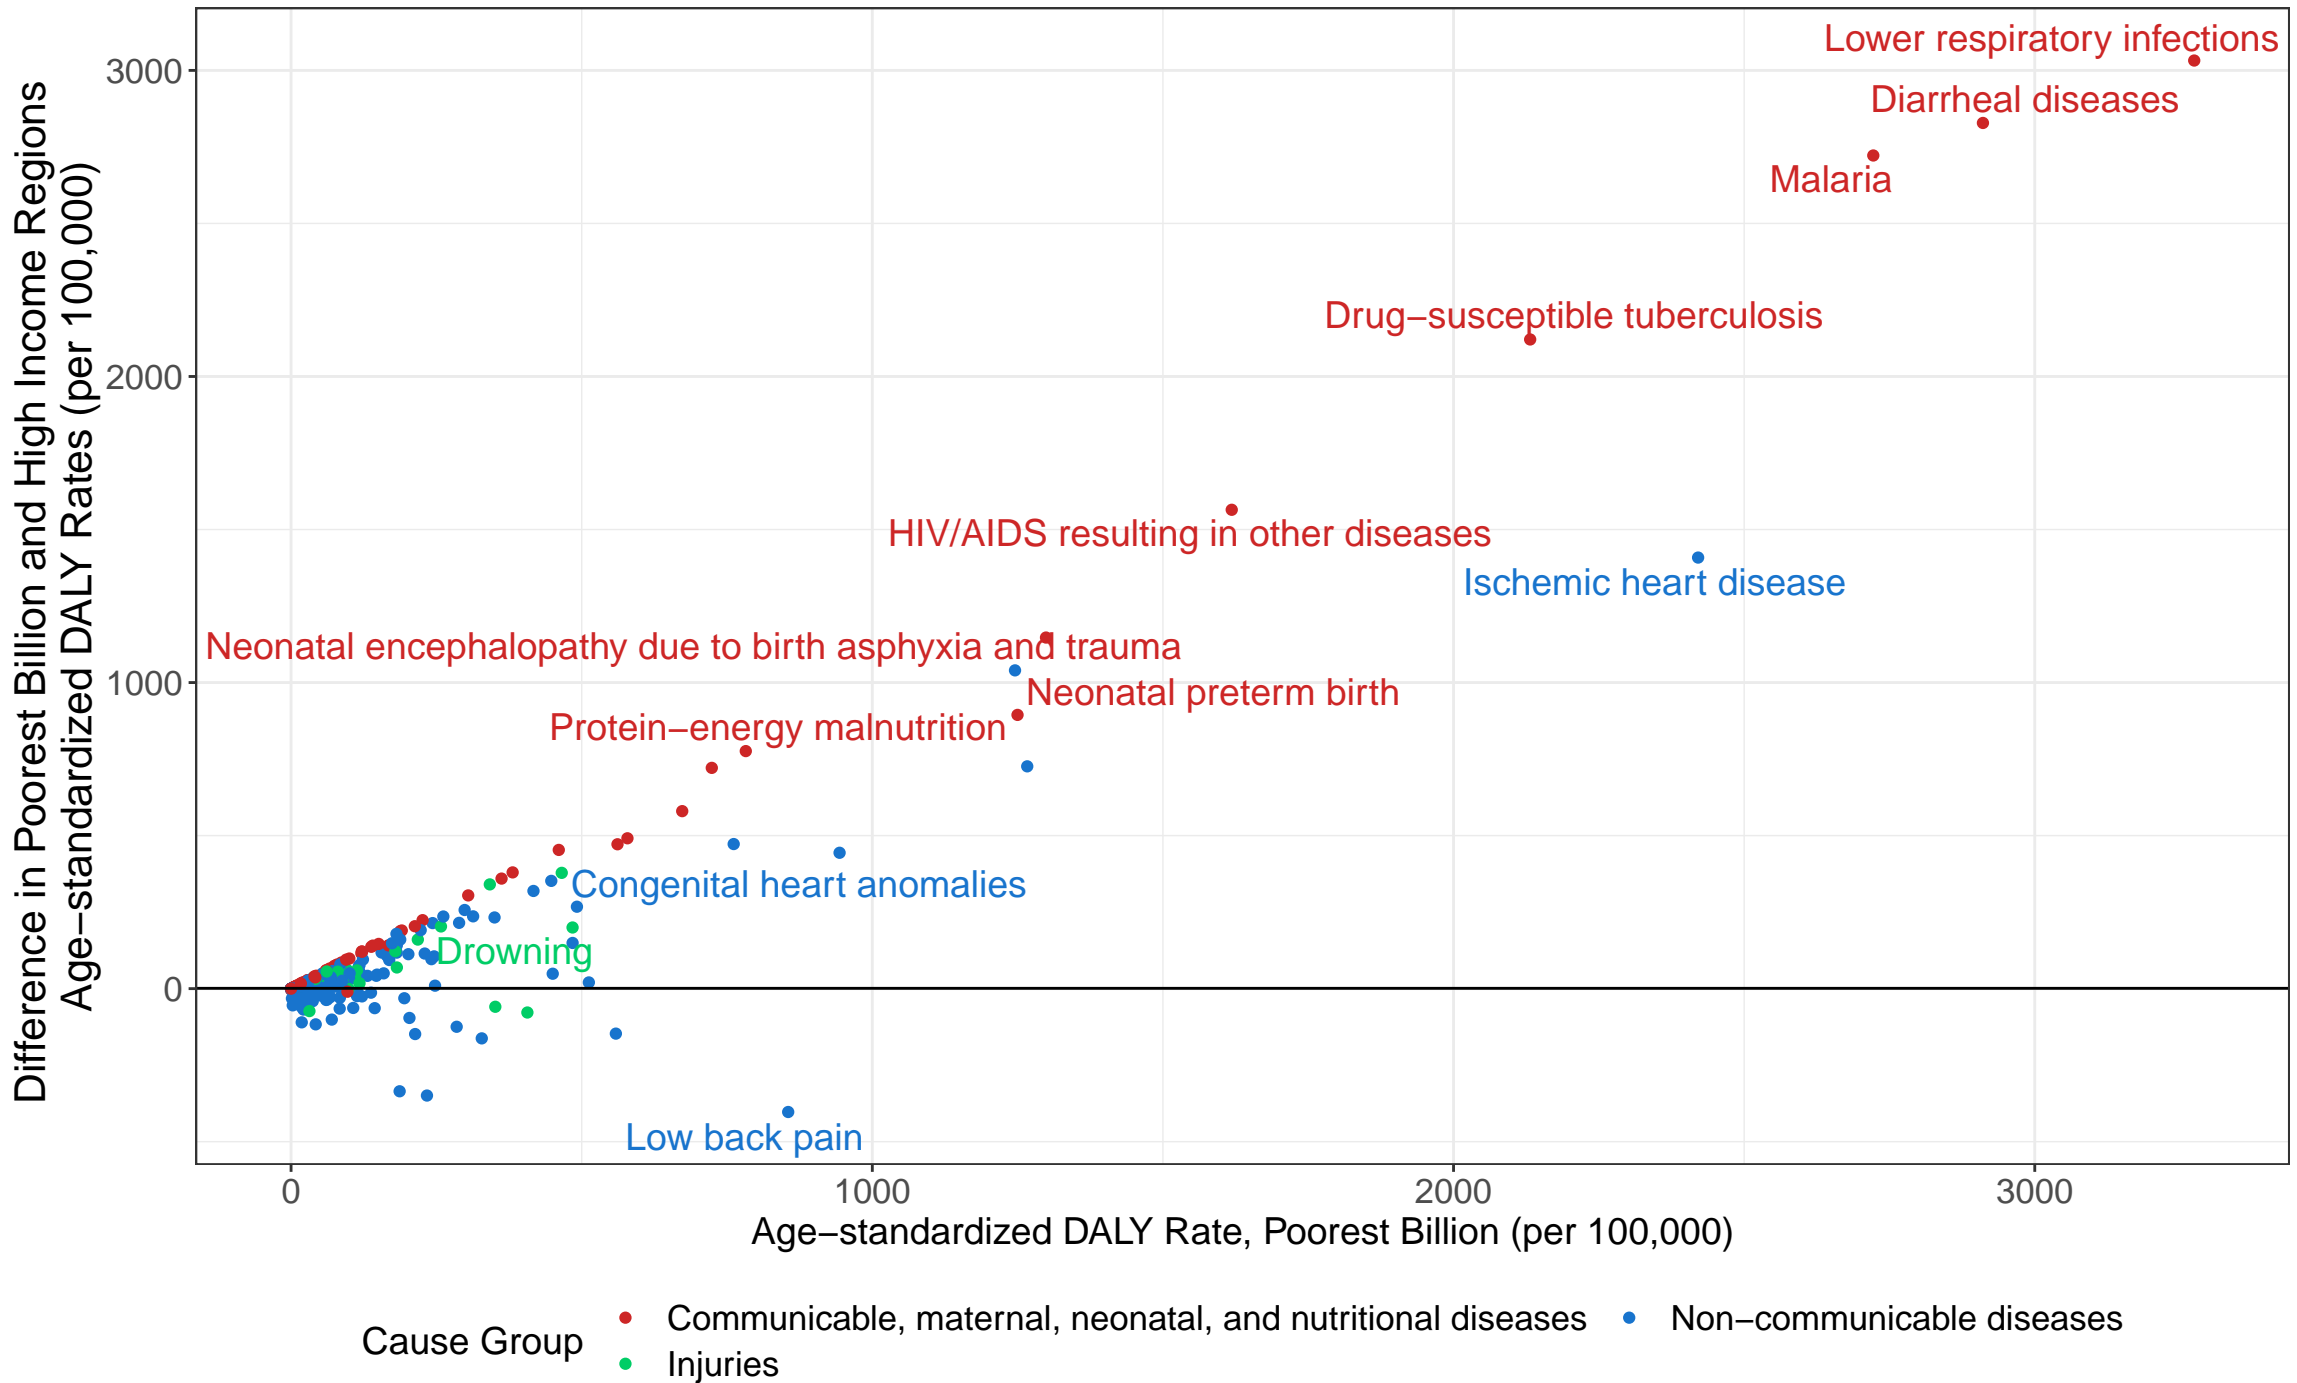

Appendix Figure 7a. Age-specific Percent of DALYs by Cause, Selective Ecological Approach

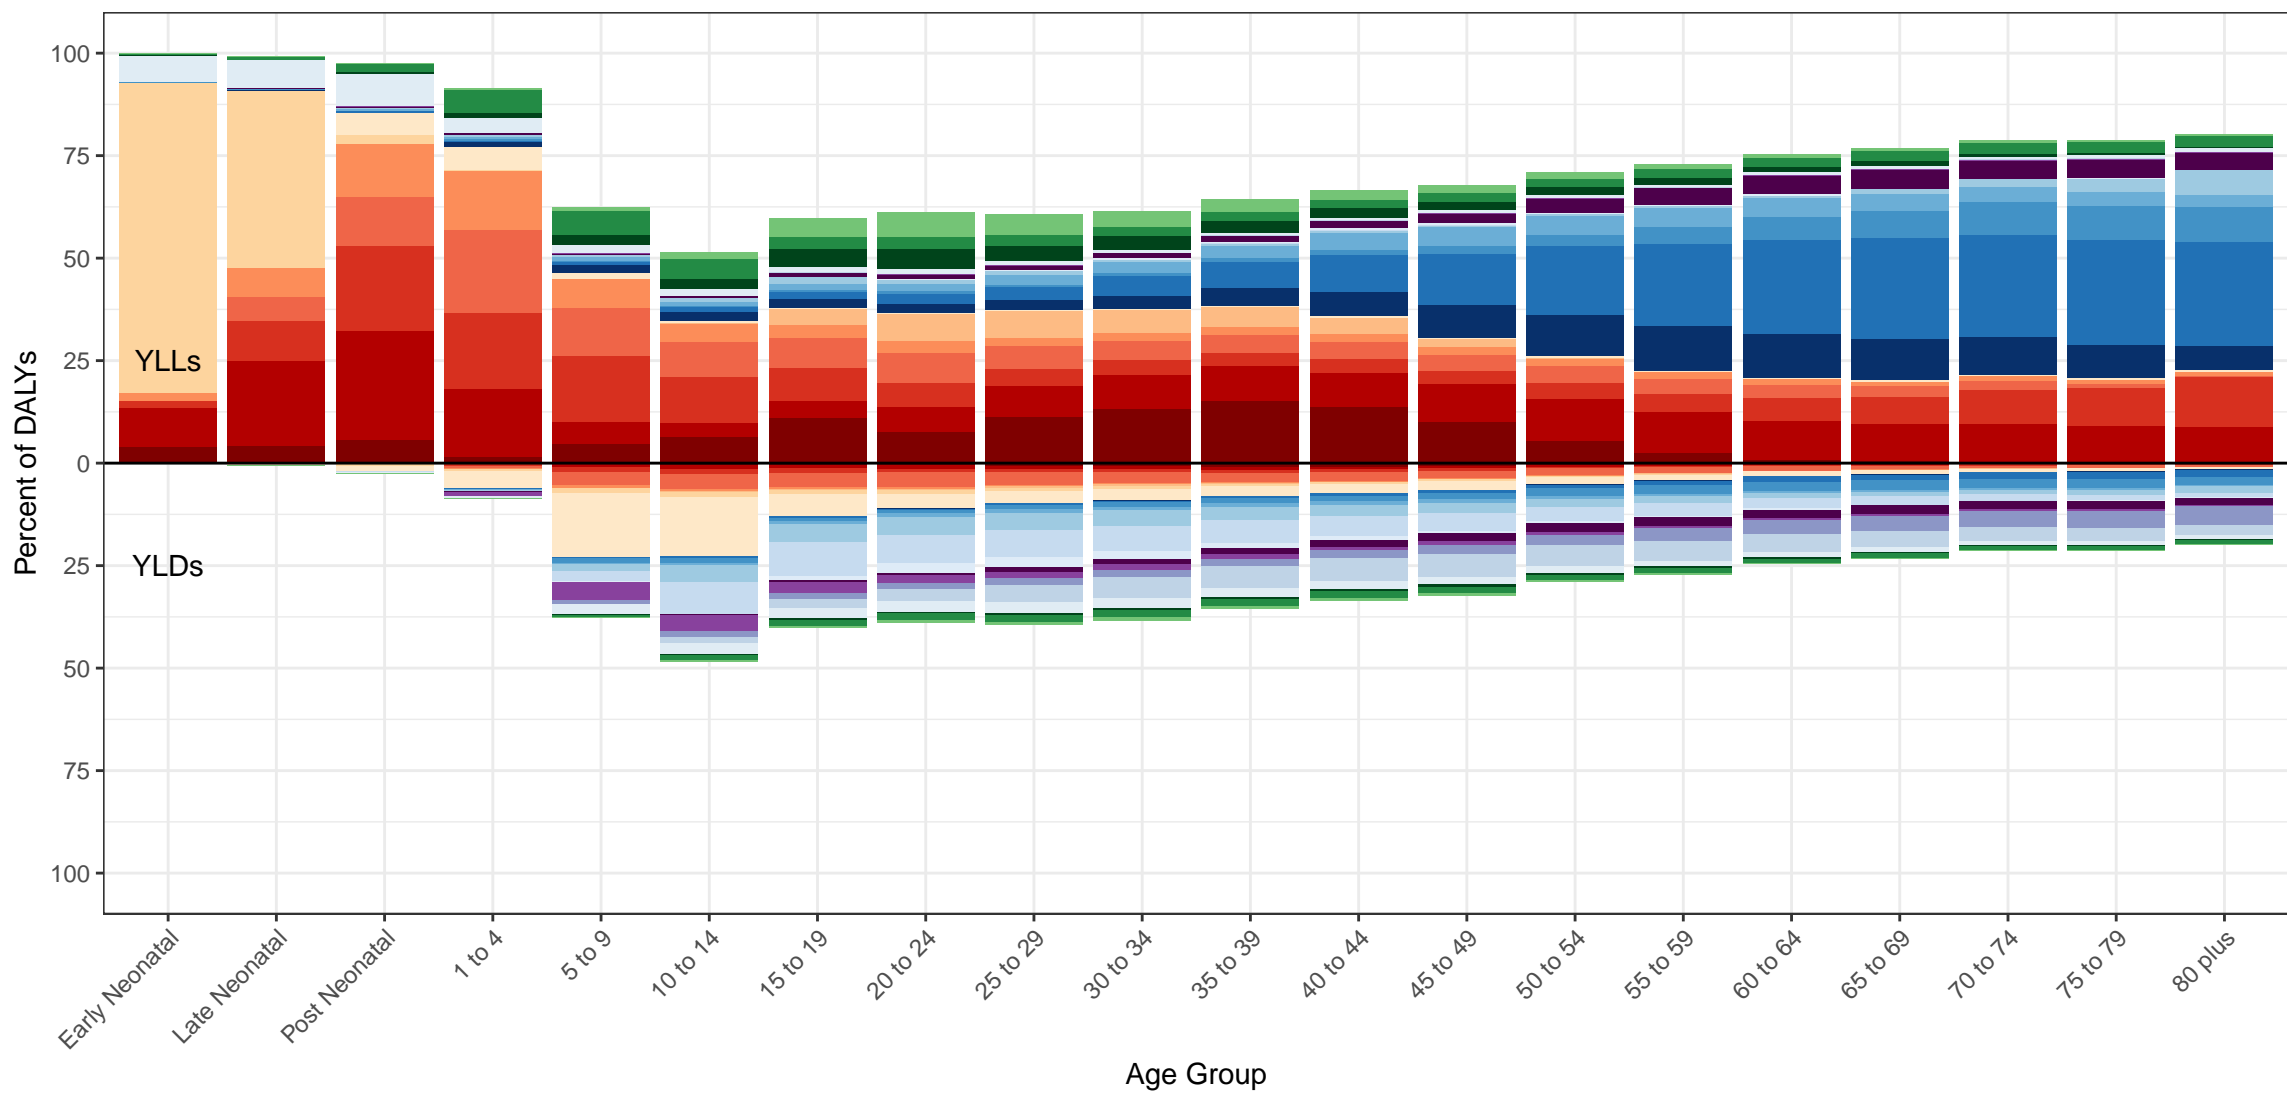

- Cause Group**
- HIV/AIDS and sexually transmitted infections
  - Respiratory infections and tuberculosis
  - Enteric infections
  - Neglected tropical diseases and malaria
  - Other infectious diseases
  - Maternal disorders
  - Neonatal disorders
  - Nutritional deficiencies
  - Neoplasms
  - Cardiovascular diseases
  - Chronic respiratory diseases
  - Digestive diseases
  - Neurological disorders
  - Mental disorders
  - Substance use disorders
  - Diabetes and kidney diseases
  - Skin and subcutaneous diseases
  - Sense organ diseases
  - Musculoskeletal disorders
  - Other non-communicable diseases
  - Transport injuries
  - Unintentional injuries
  - Self-harm and interpersonal violence

Appendix Figure 7b. Age-specific Percent of DALYs by Cause, High-income Regions

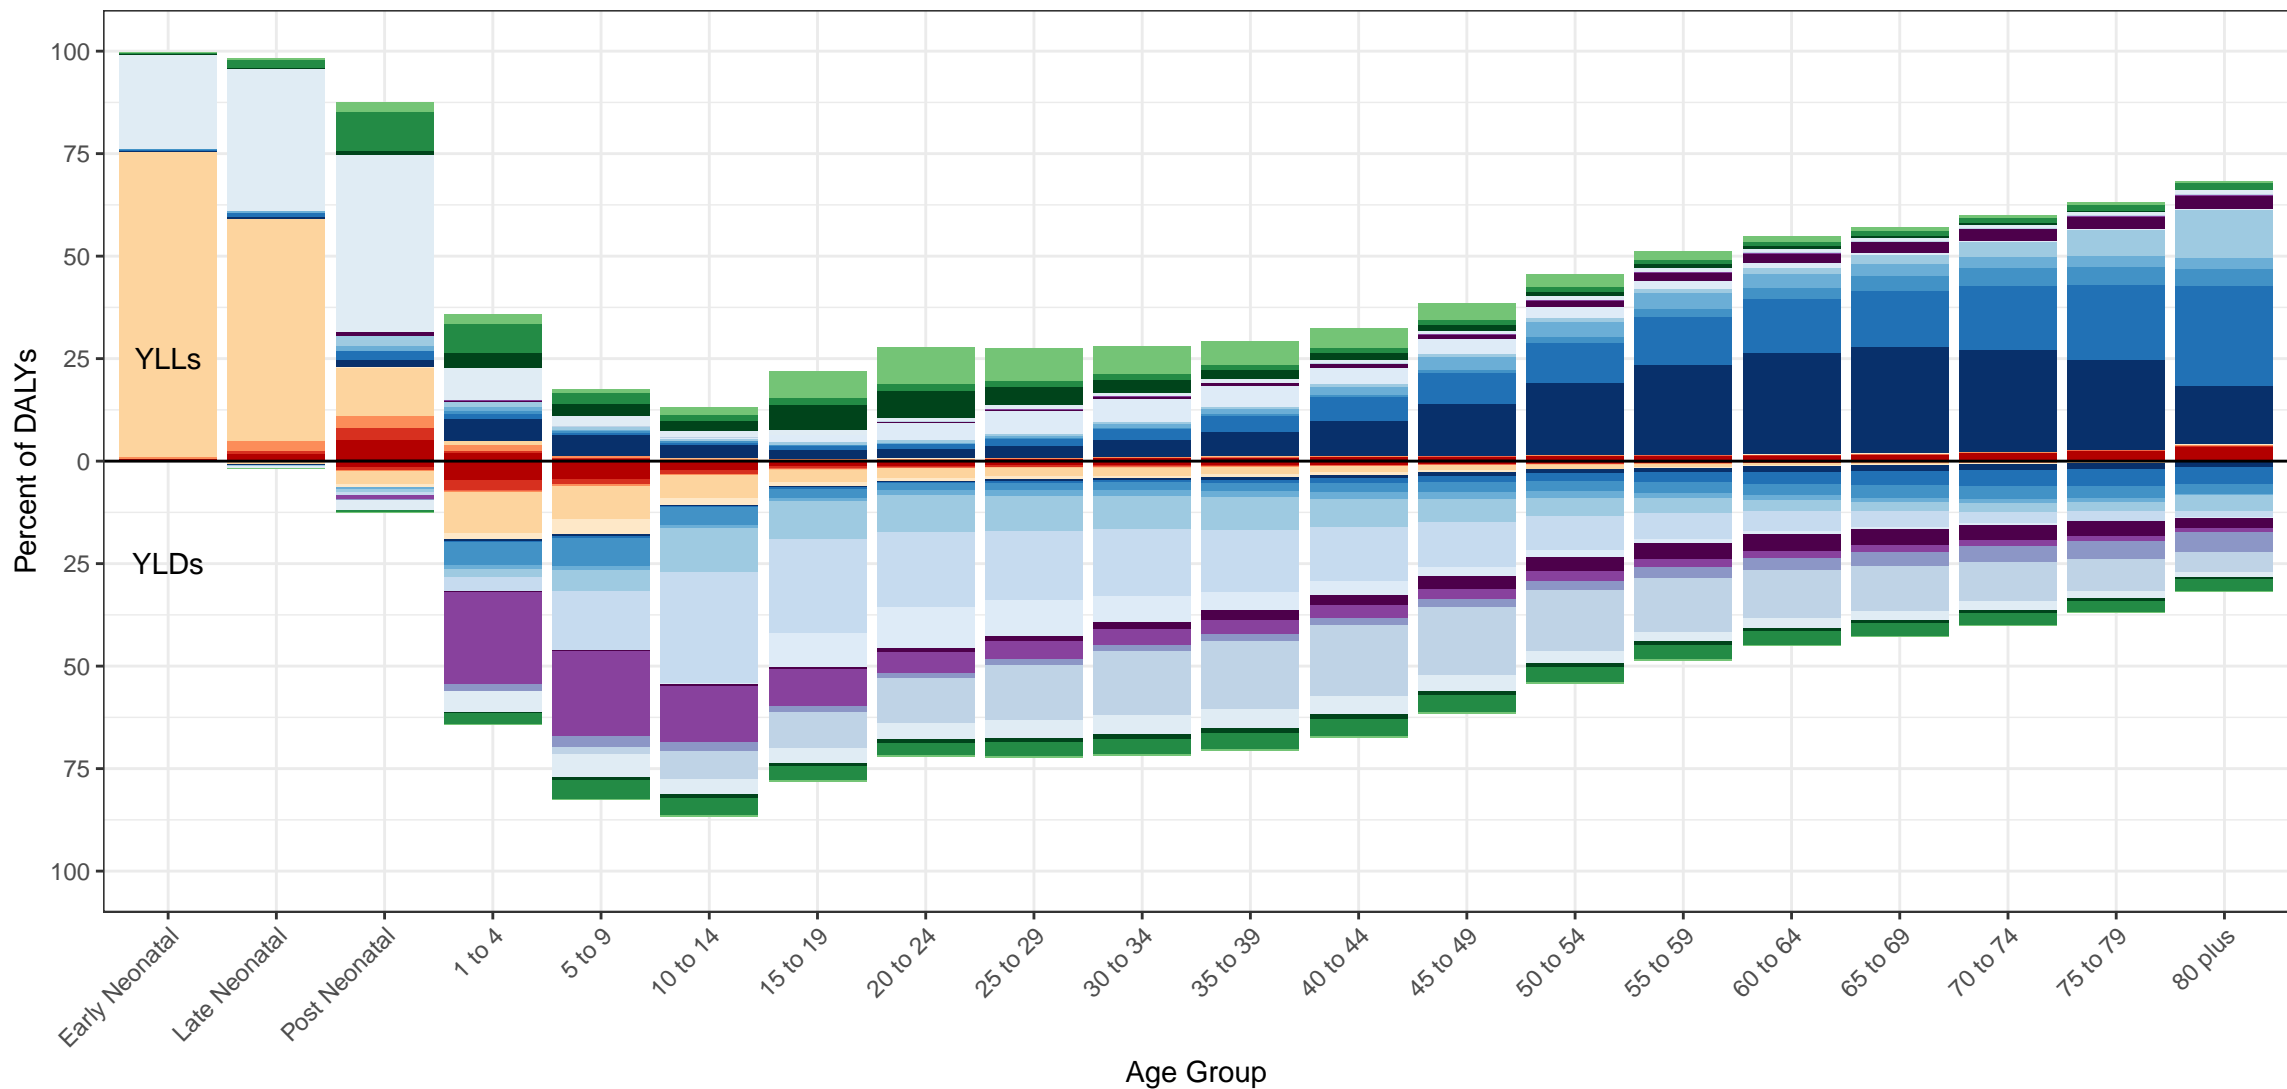

- Cause Group**
- HIV/AIDS and sexually transmitted infections
  - Respiratory infections and tuberculosis
  - Enteric infections
  - Neglected tropical diseases and malaria
  - Other infectious diseases
  - Maternal disorders
  - Neonatal disorders
  - Nutritional deficiencies
  - Neoplasms
  - Cardiovascular diseases
  - Chronic respiratory diseases
  - Digestive diseases
  - Neurological disorders
  - Mental disorders
  - Substance use disorders
  - Diabetes and kidney diseases
  - Skin and subcutaneous diseases
  - Sense organ diseases
  - Musculoskeletal disorders
  - Other non-communicable diseases
  - Transport injuries
  - Unintentional injuries
  - Self-harm and interpersonal violence

Appendix Figure 7c. Age-specific Percent of DALYs by Cause, Full Ecological Approach

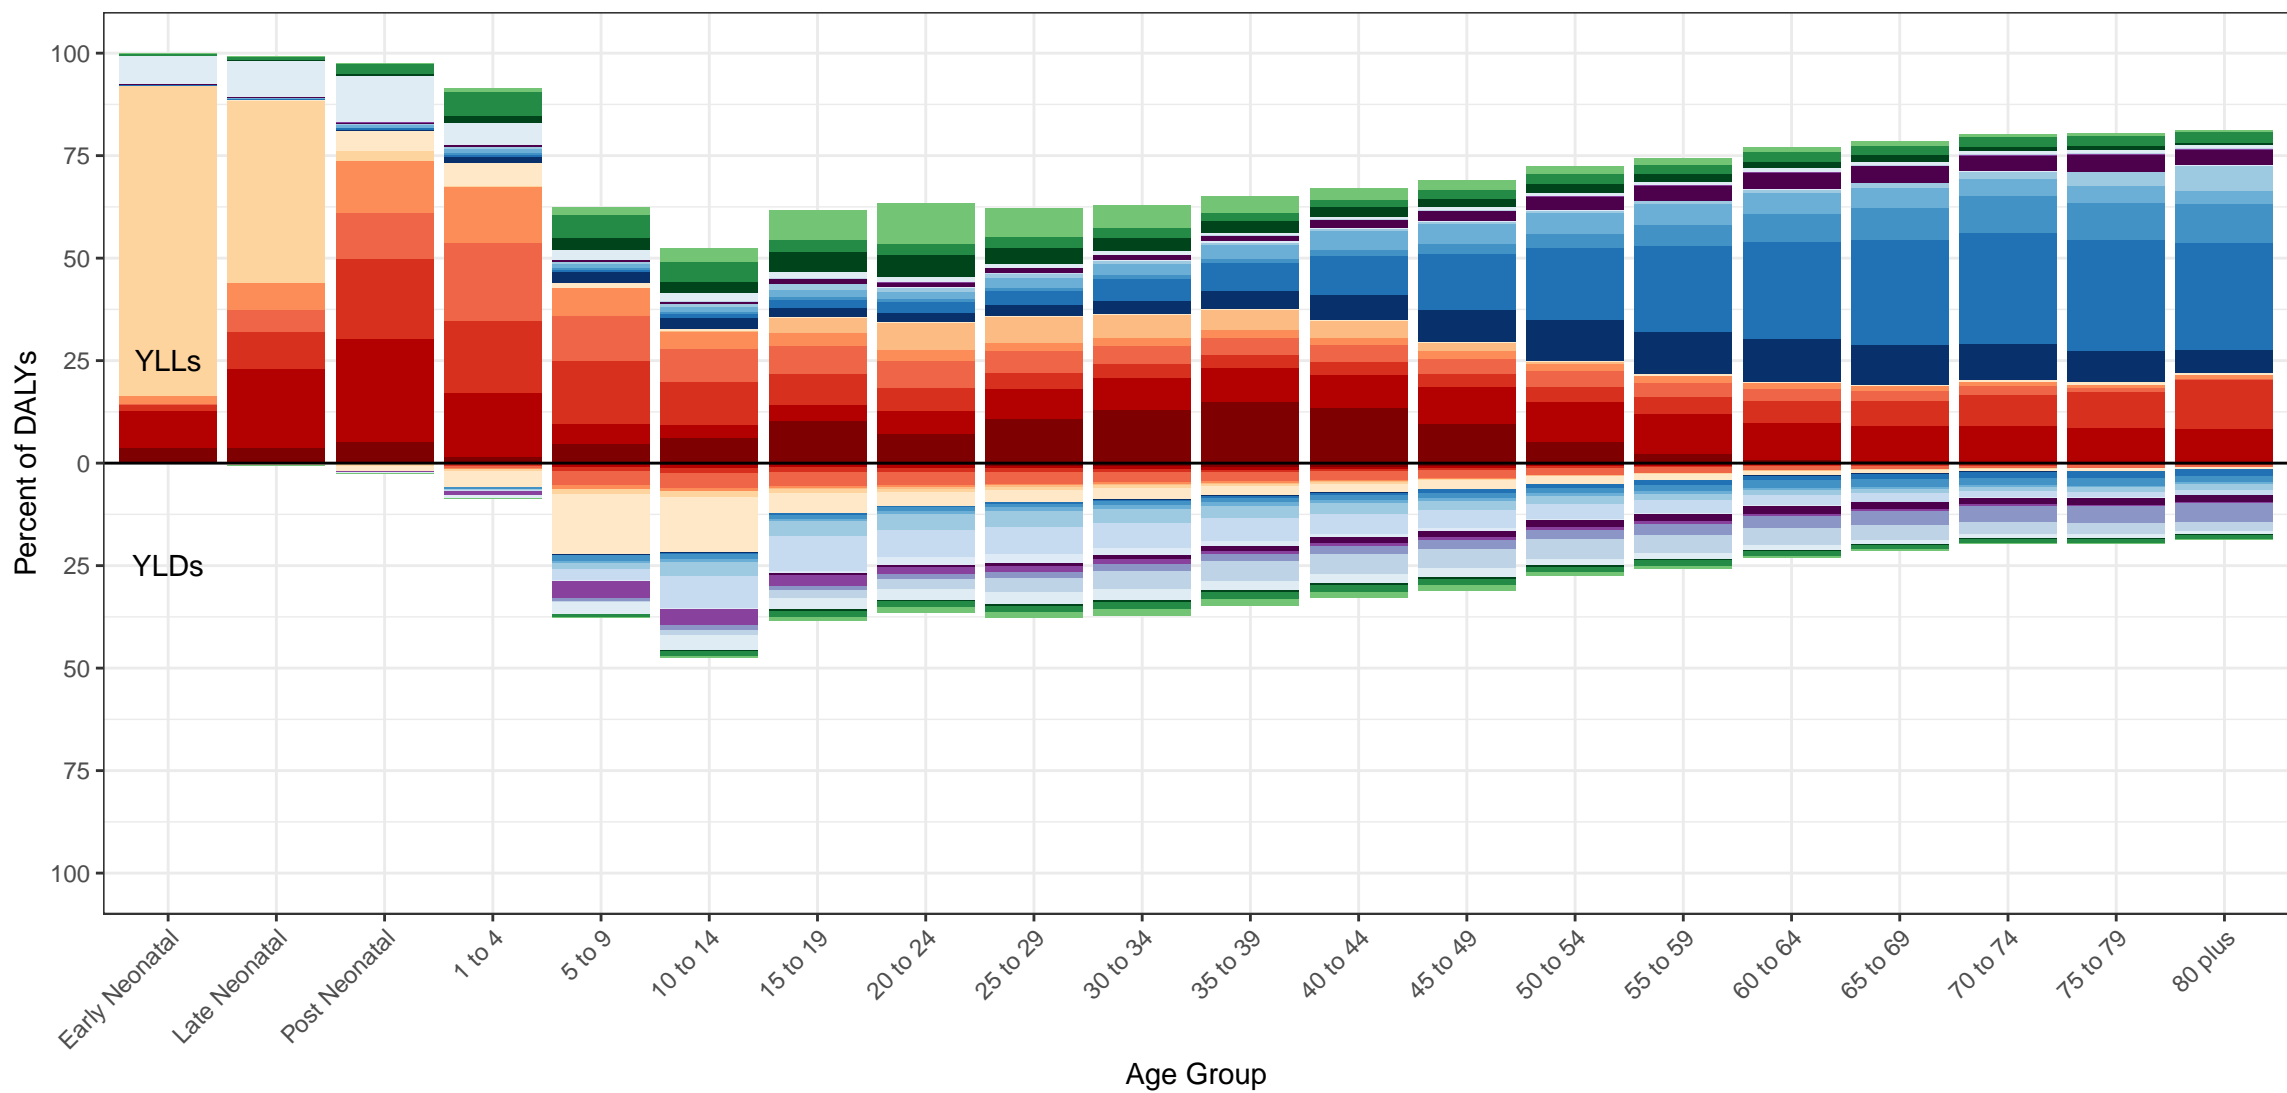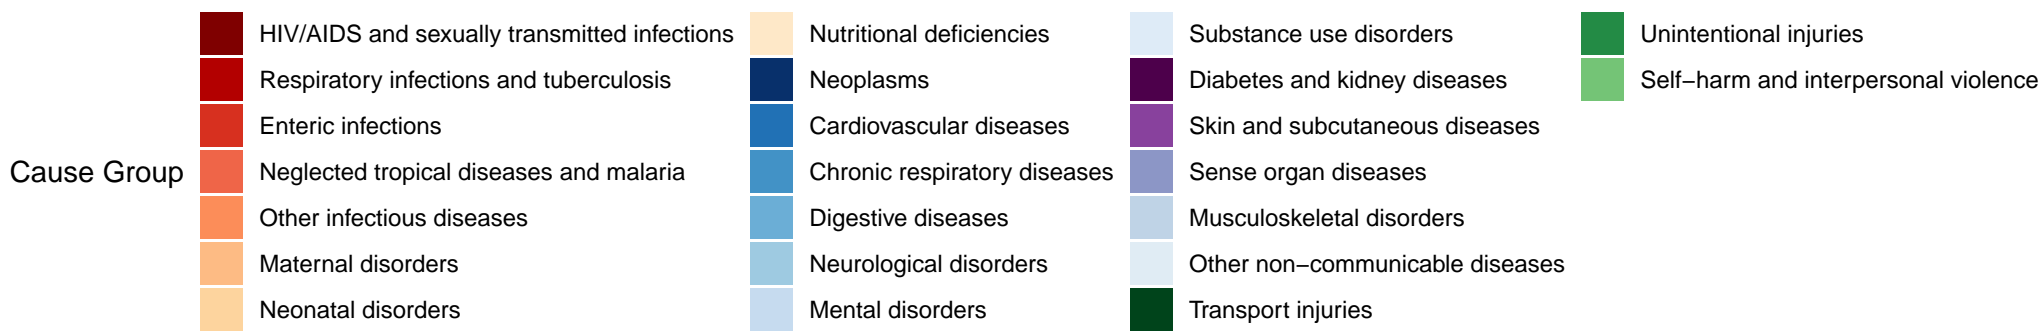

Appendix Figure 7d. Age-specific Percent of DALYs by Cause, Poorest Billion Aggregation

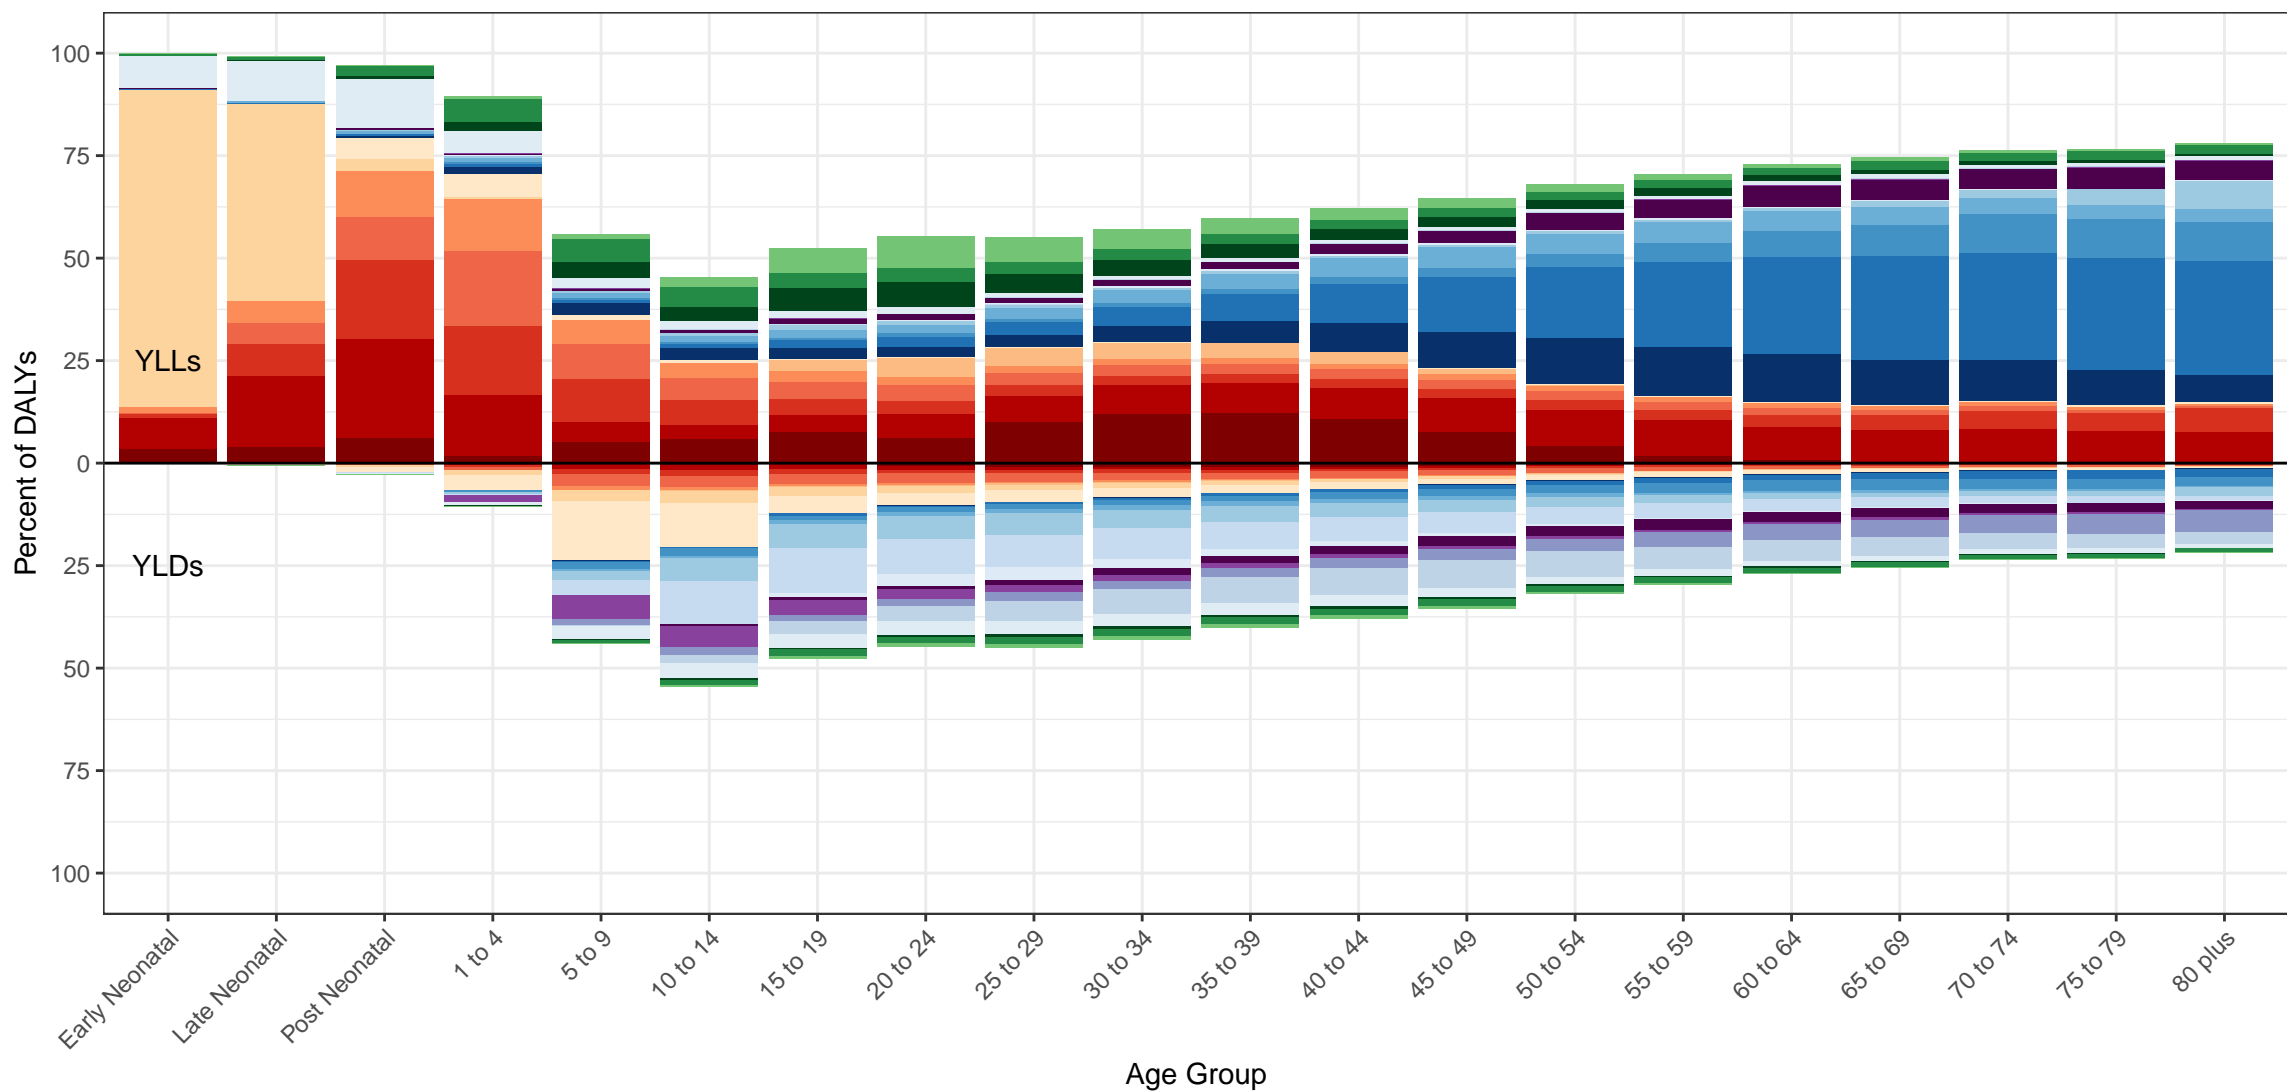

Appendix Figure 7e. Age-specific Percent of DALYs by Cause, Country Aggregation

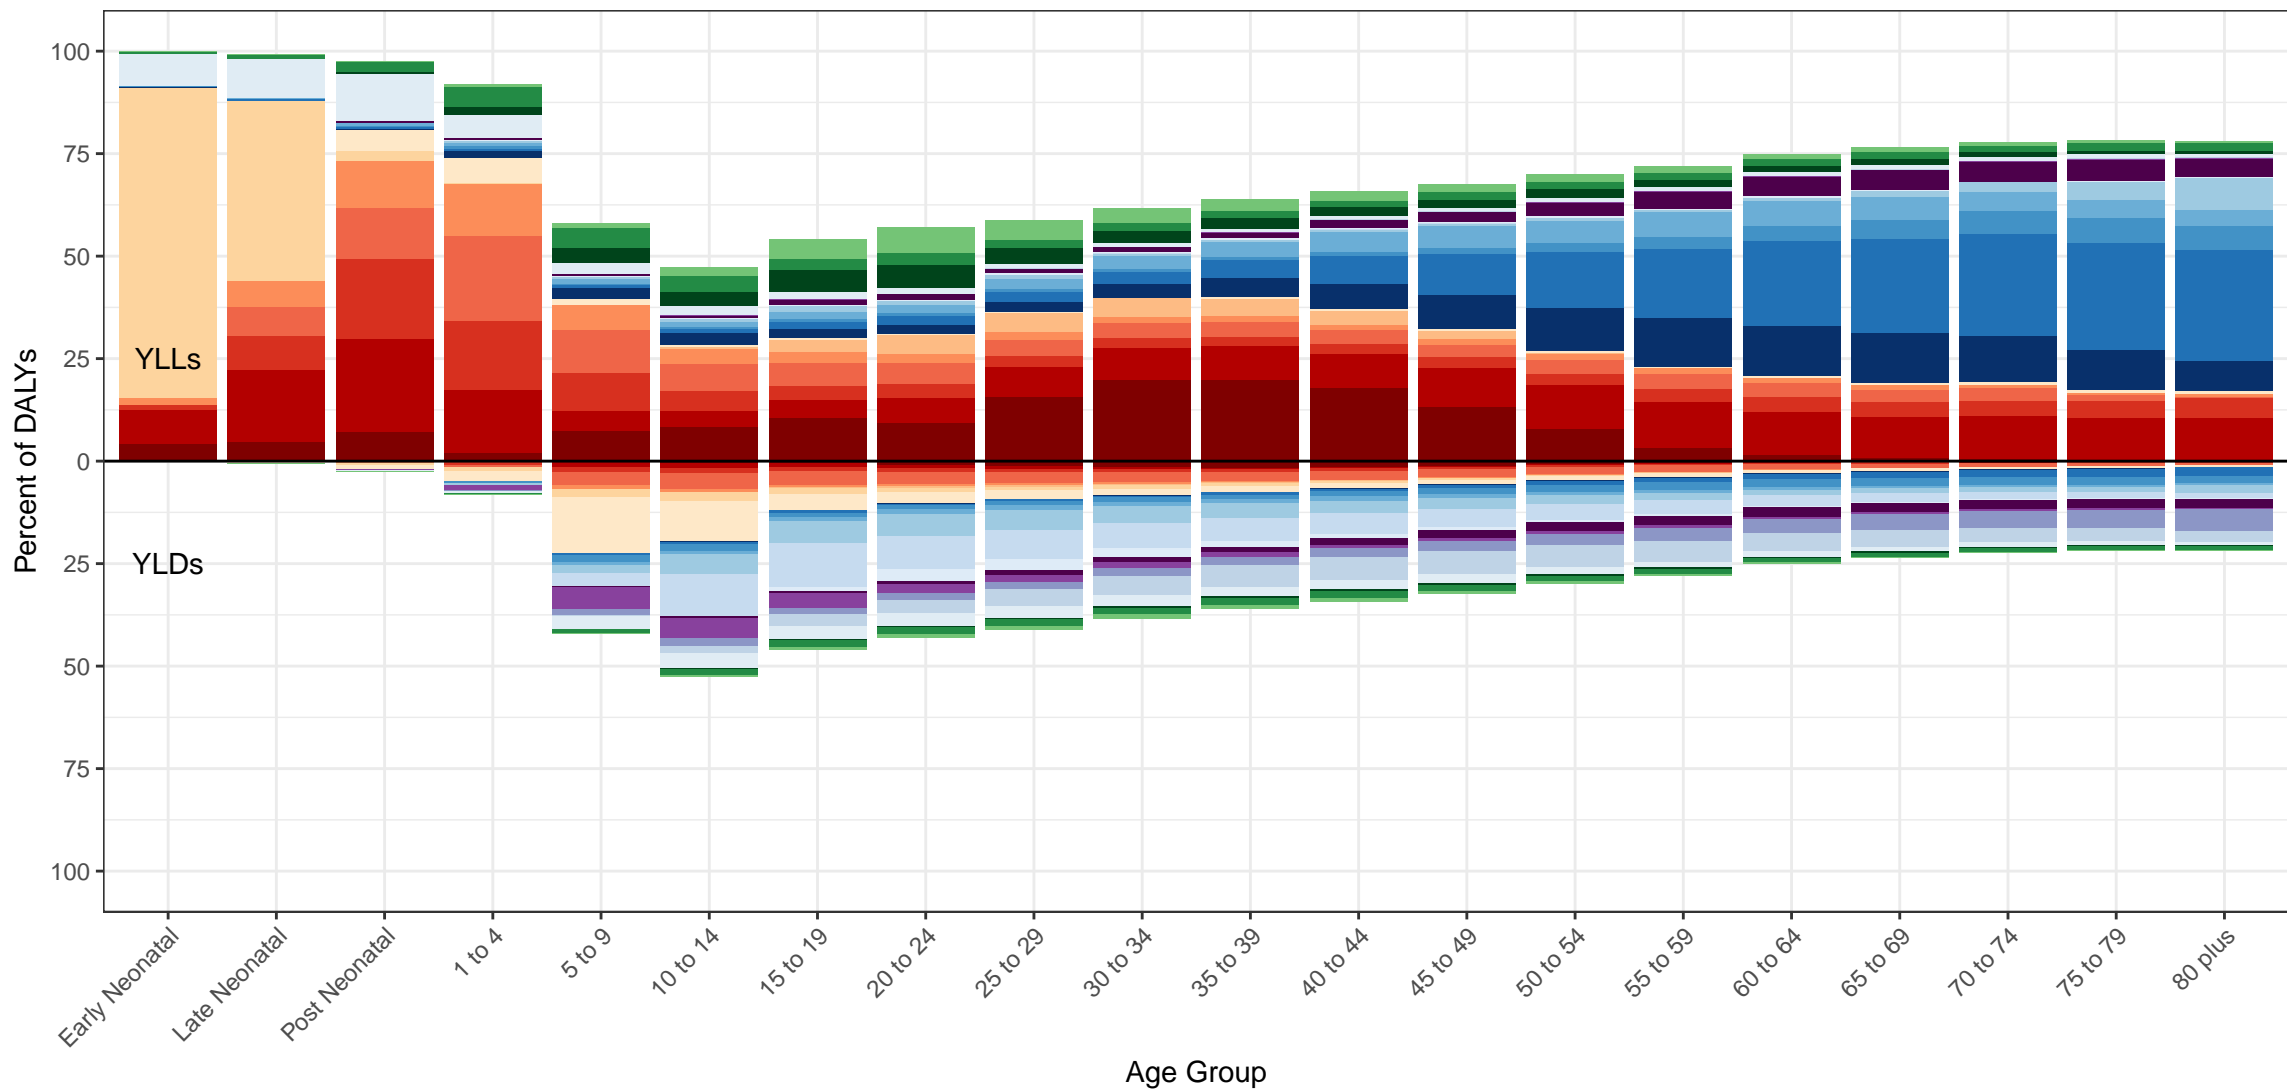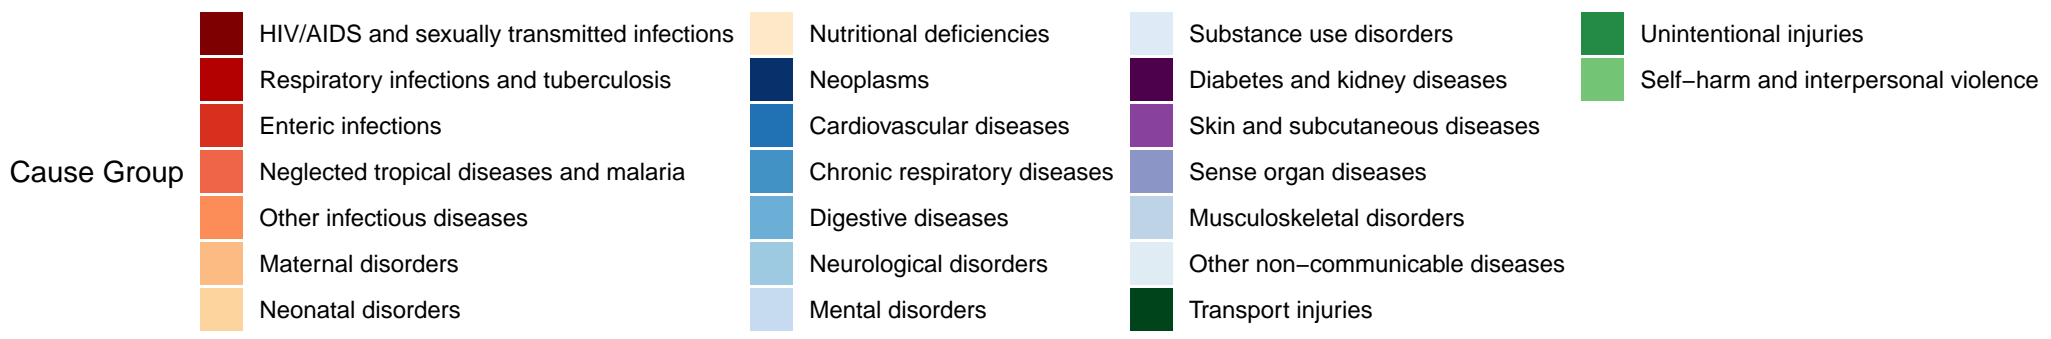



Appendix Figure 7f. Age-specific Percent of DALYs by Cause, Low-income Countries

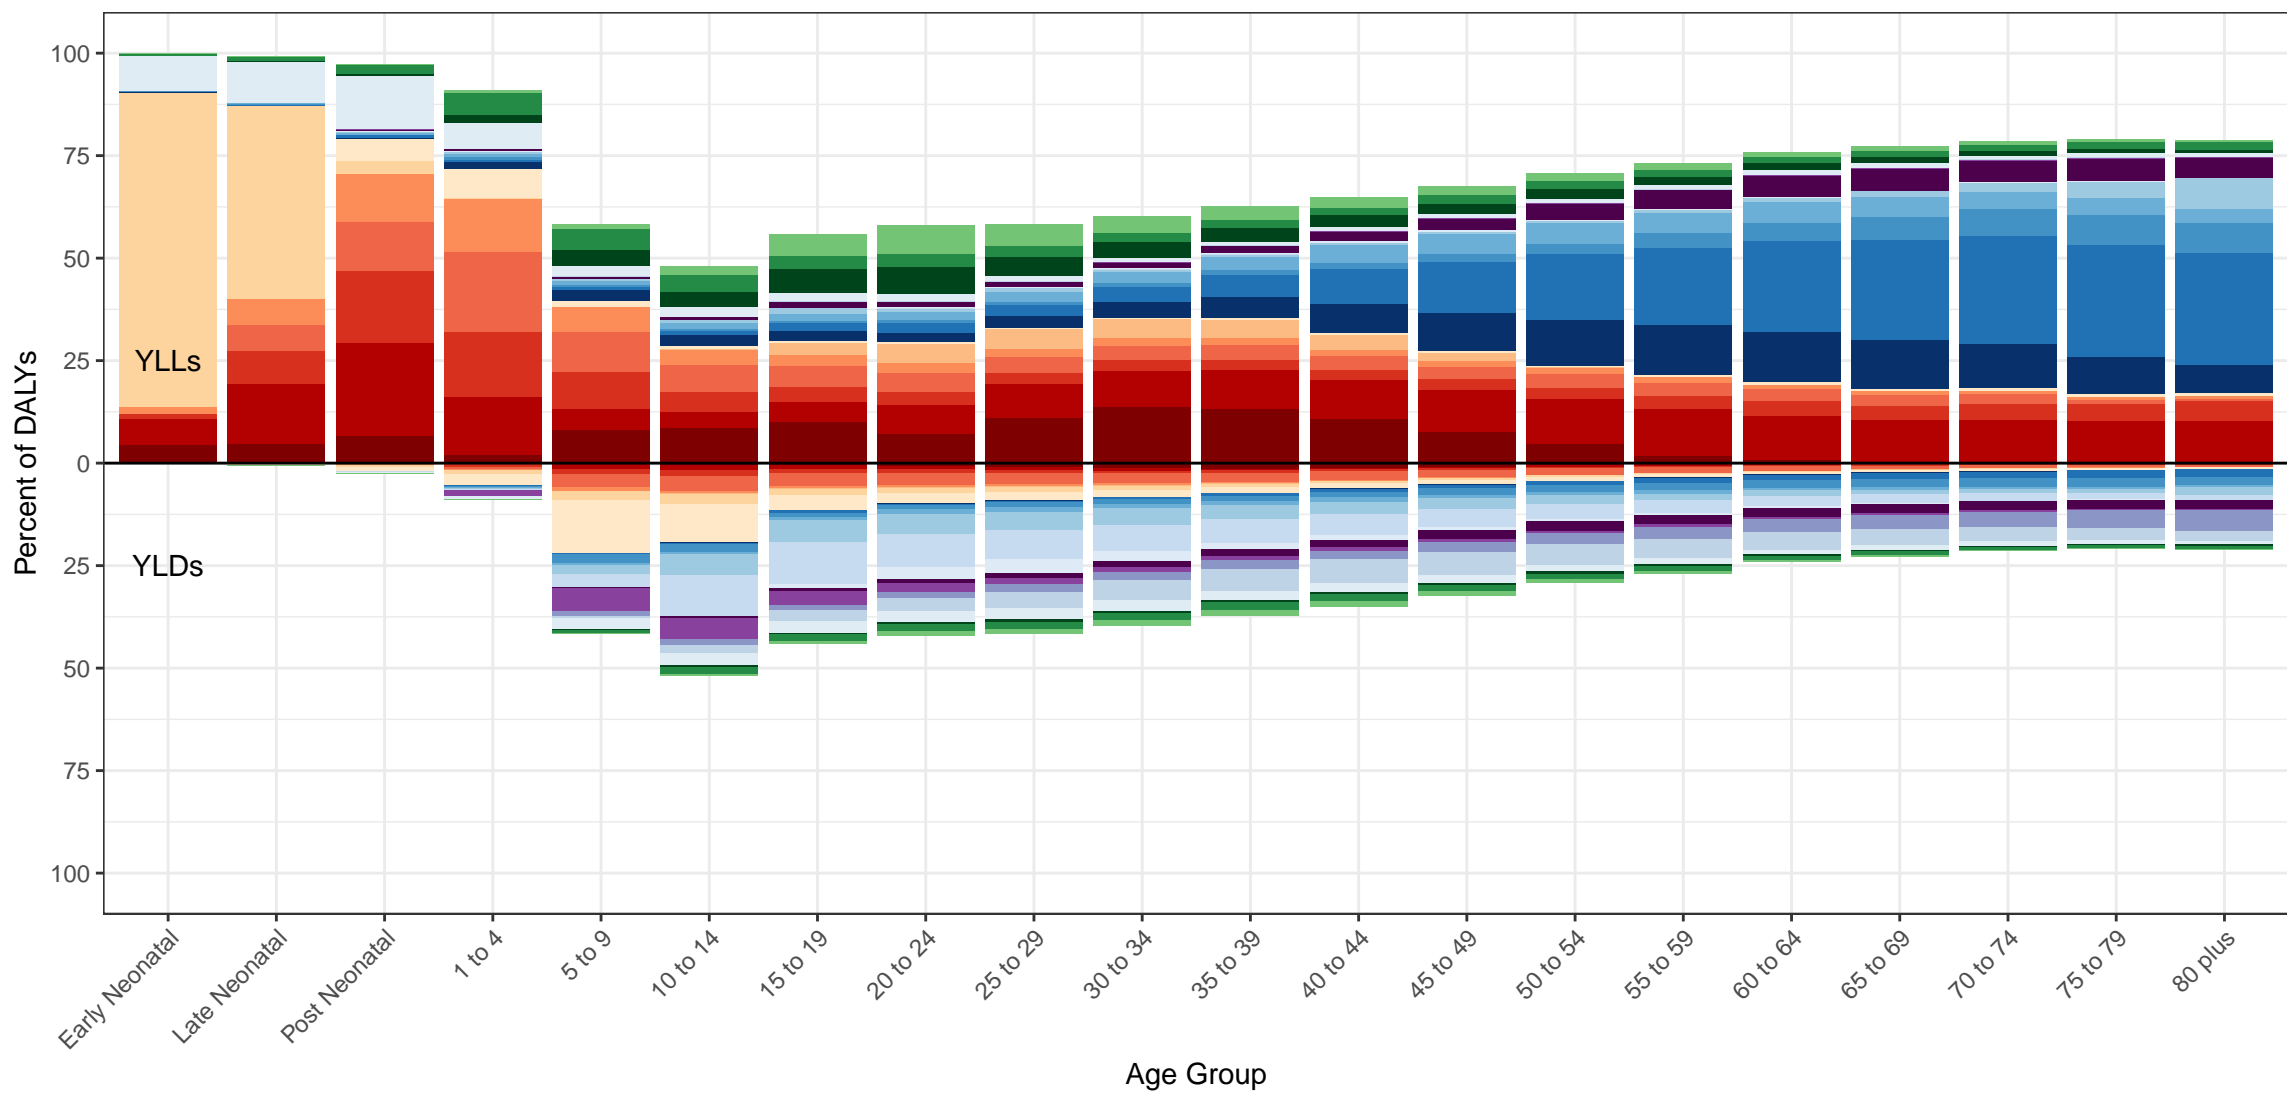

- Cause Group**
- HIV/AIDS and sexually transmitted infections
  - Nutritional deficiencies
  - Substance use disorders
  - Unintentional injuries
  - Respiratory infections and tuberculosis
  - Neoplasms
  - Diabetes and kidney diseases
  - Enteric infections
  - Cardiovascular diseases
  - Skin and subcutaneous diseases
  - Neglected tropical diseases and malaria
  - Chronic respiratory diseases
  - Sense organ diseases
  - Other infectious diseases
  - Digestive diseases
  - Musculoskeletal disorders
  - Maternal disorders
  - Neurological disorders
  - Other non-communicable diseases
  - Neonatal disorders
  - Mental disorders
  - Transport injuries
  - Self-harm and interpersonal violence

Appendix Figure 7g. Age-specific Percent of DALYs by Cause, Lower-middle-income Countries

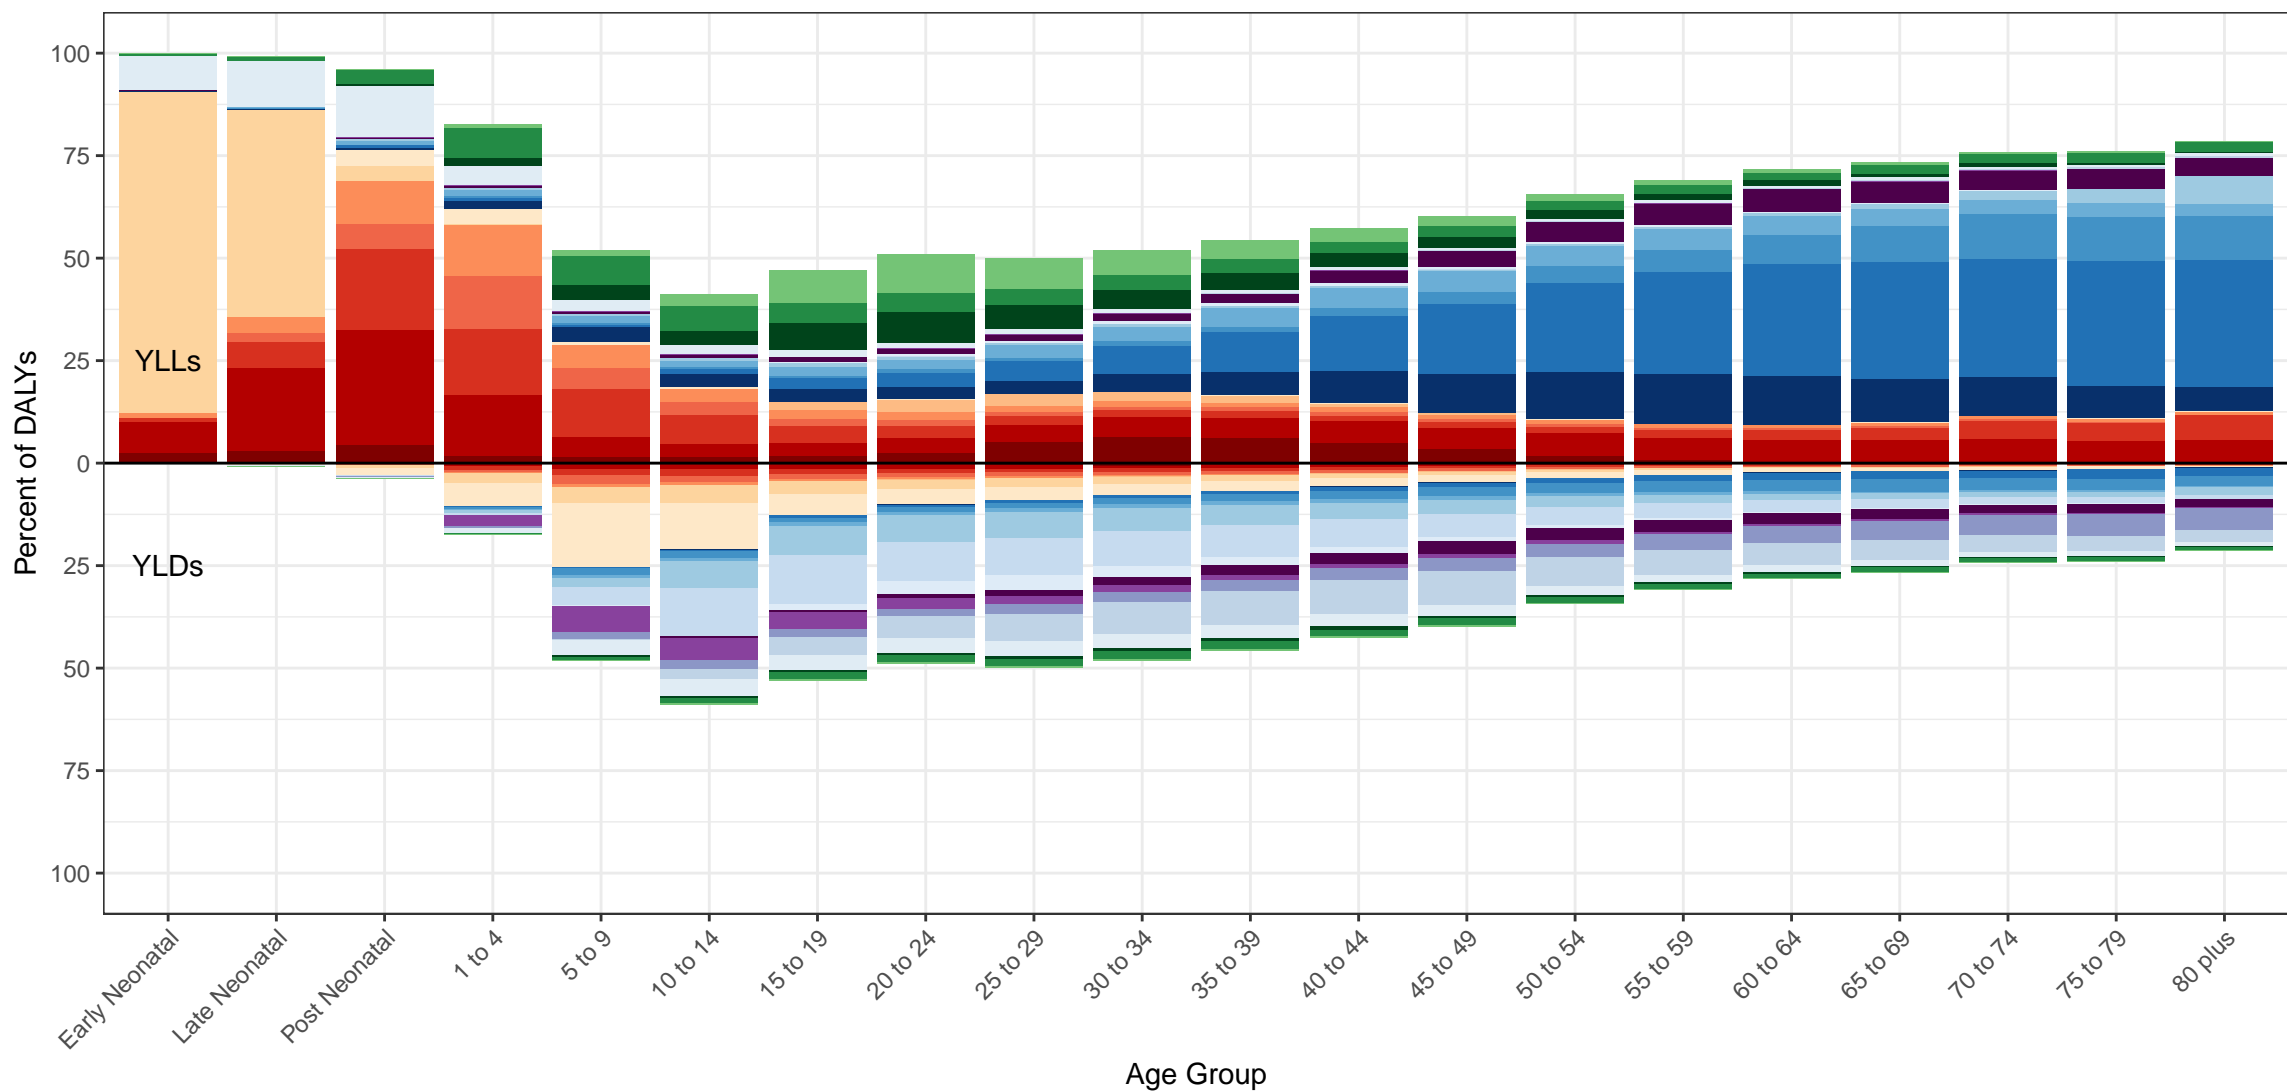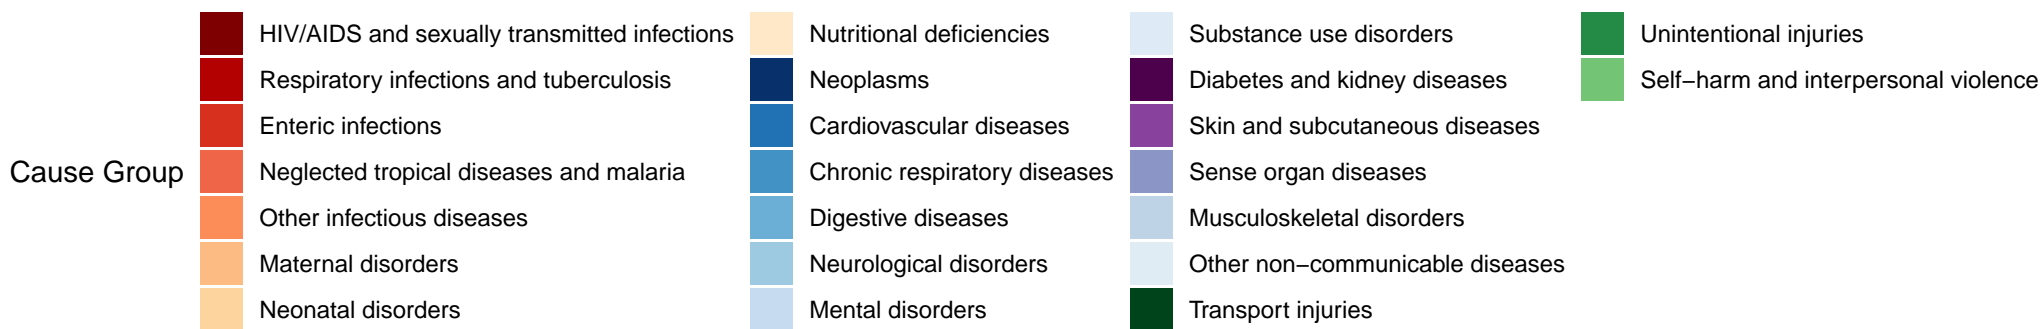

Appendix Figure 7h. Age-specific Percent of DALYs by Cause, Upper-middle-income Countries

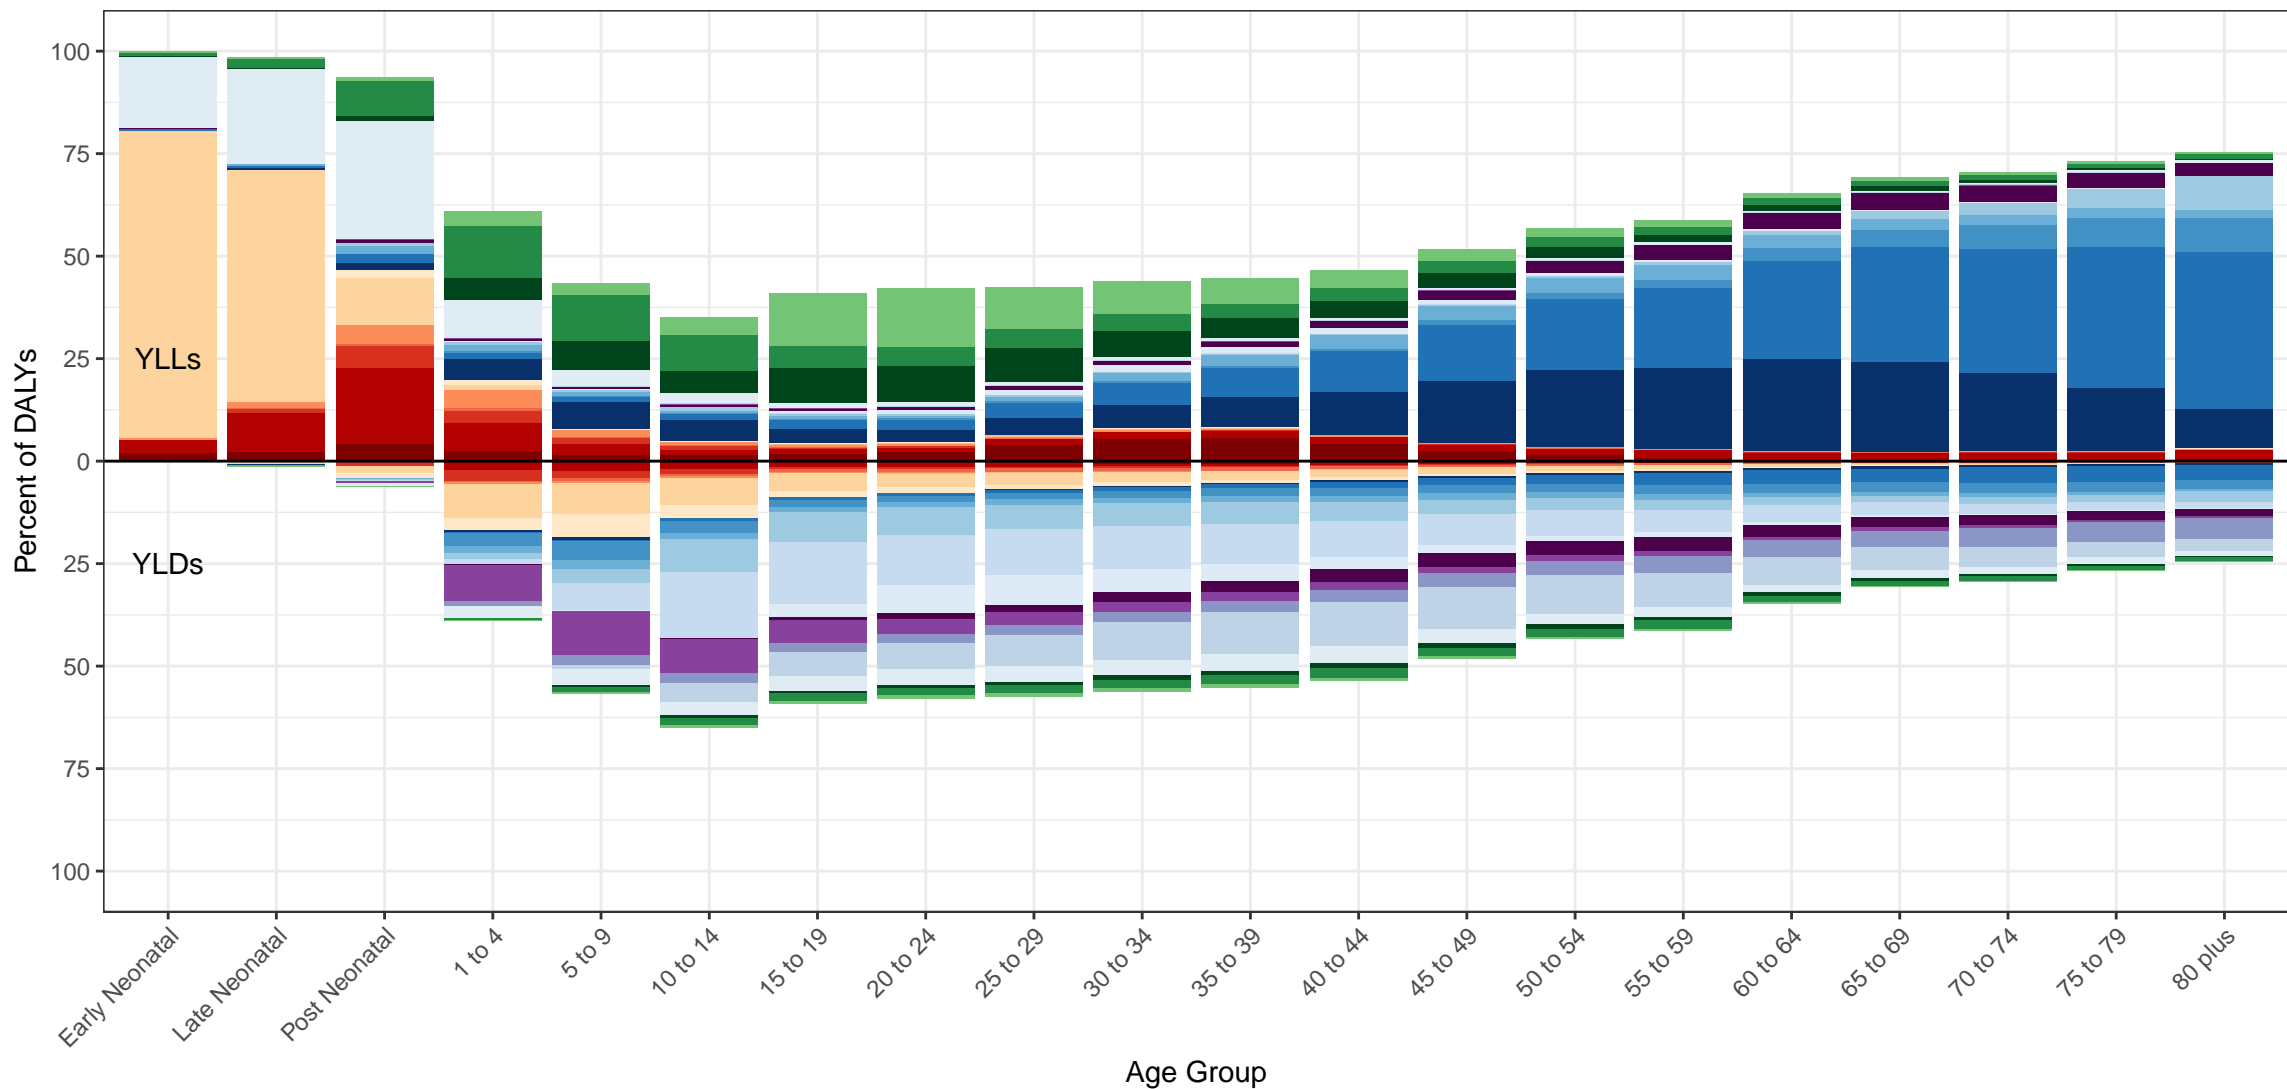

Appendix Figure 7i. Age-specific Percent of DALYs by Cause, High-income Countries

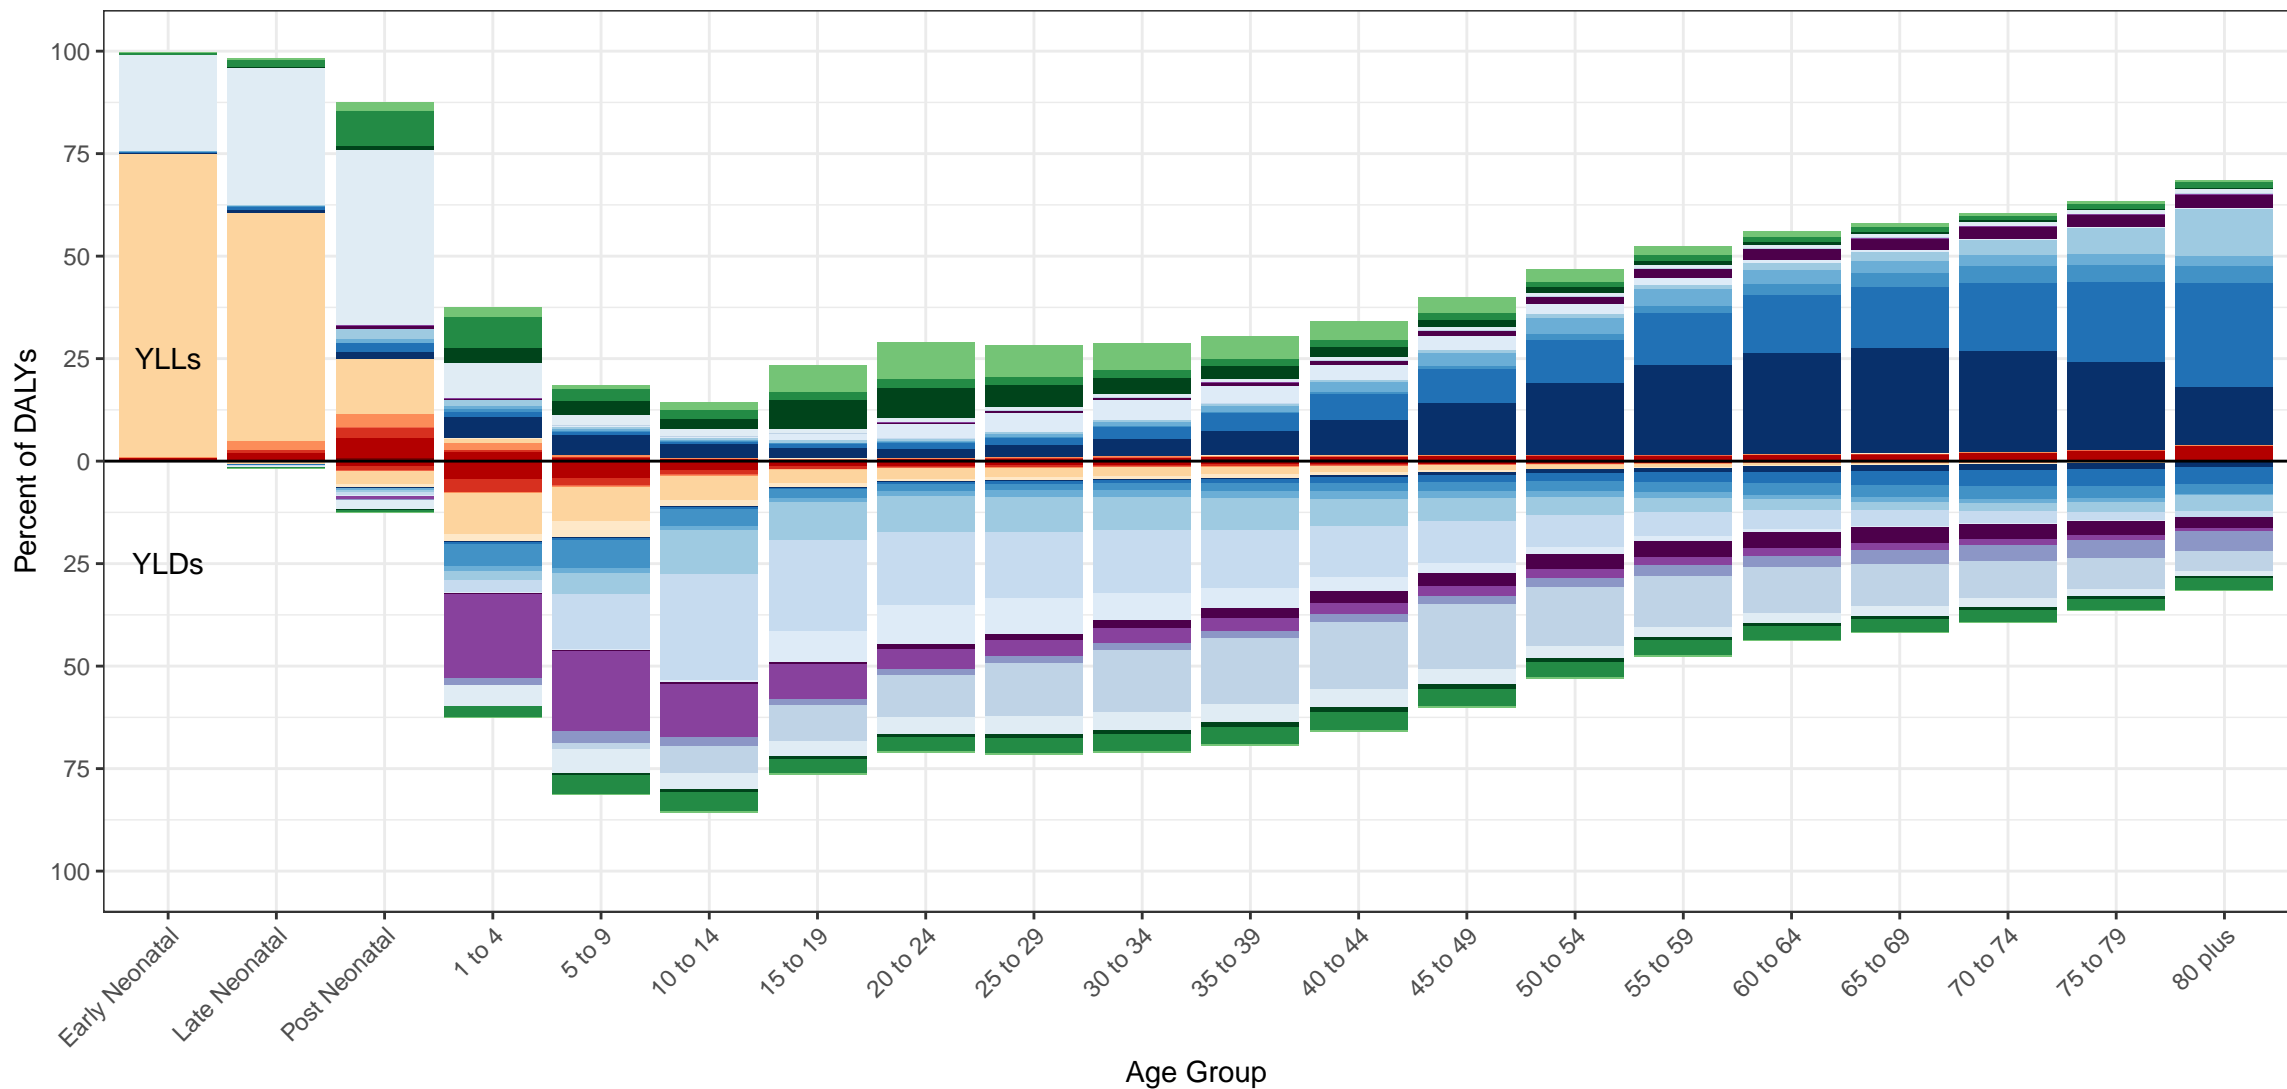

Appendix Figure 8a. Difference between Crude DALY Rates in Poorest Billion and High-income Regions, Selective Ecological Approach

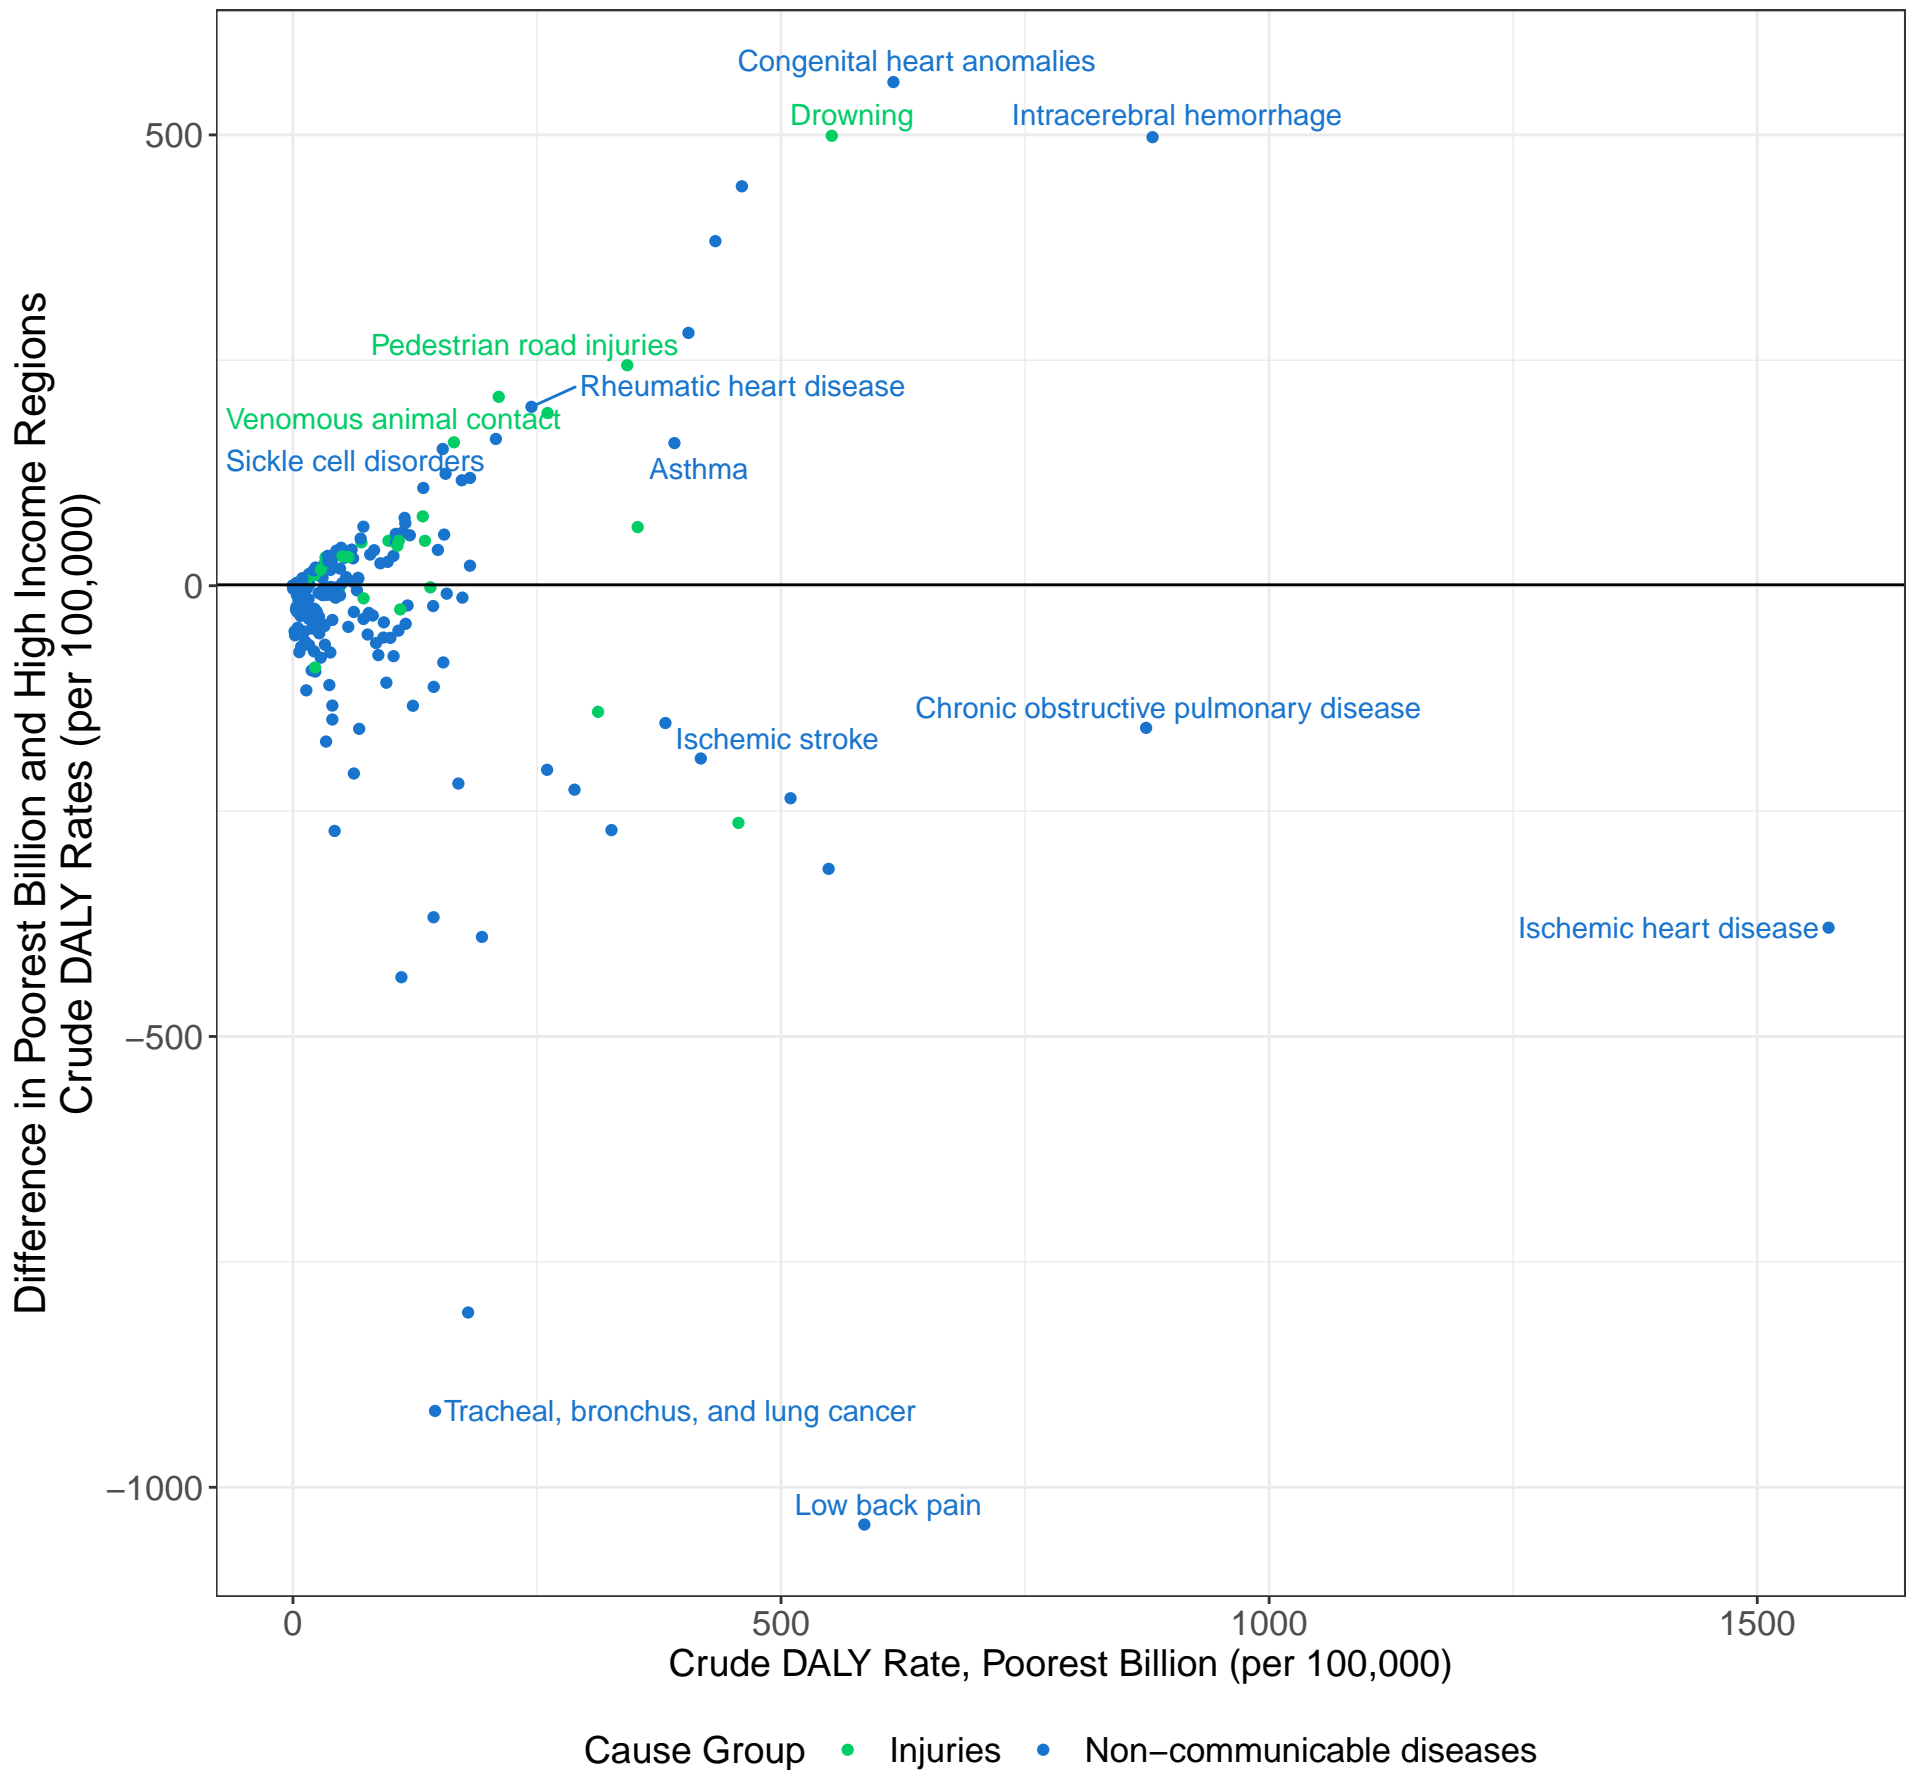

Appendix Figure 8b. Difference between Age-standardized DALY Rates in Poorest Billion and High-income Regions, Selective Ecological Approach

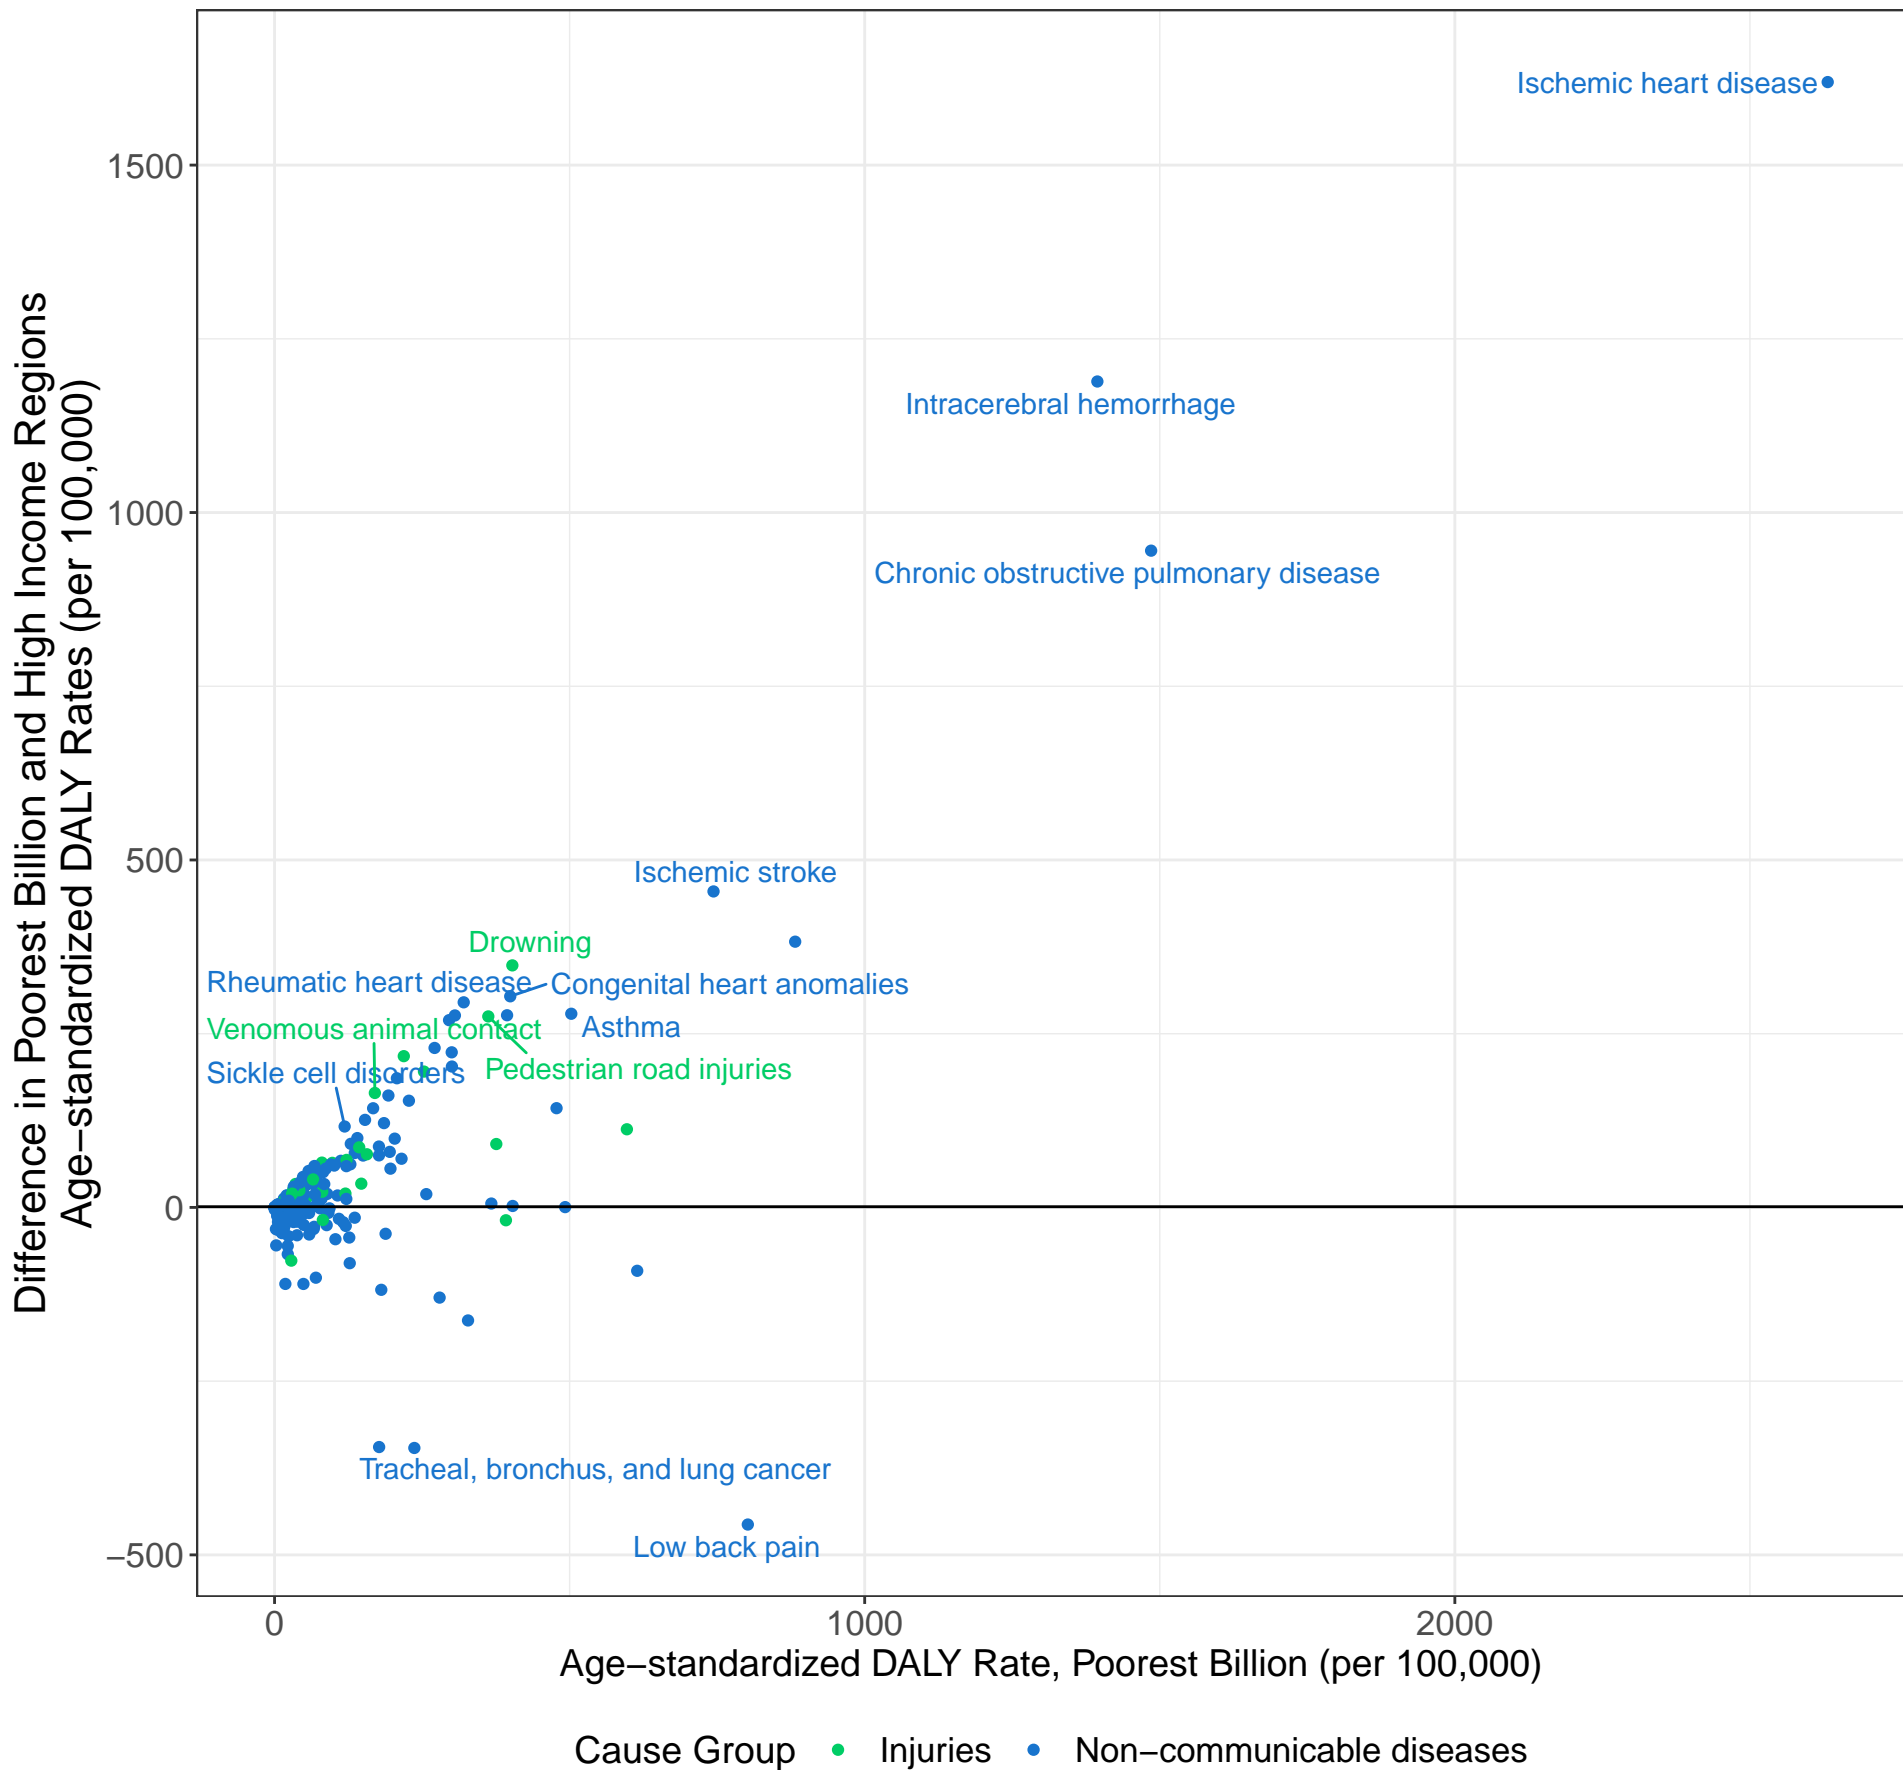







Appendix Figure 8e. Difference between Crude DALY Rates in Poorest Billion and High-income Regions, Poorest Billion Aggregation

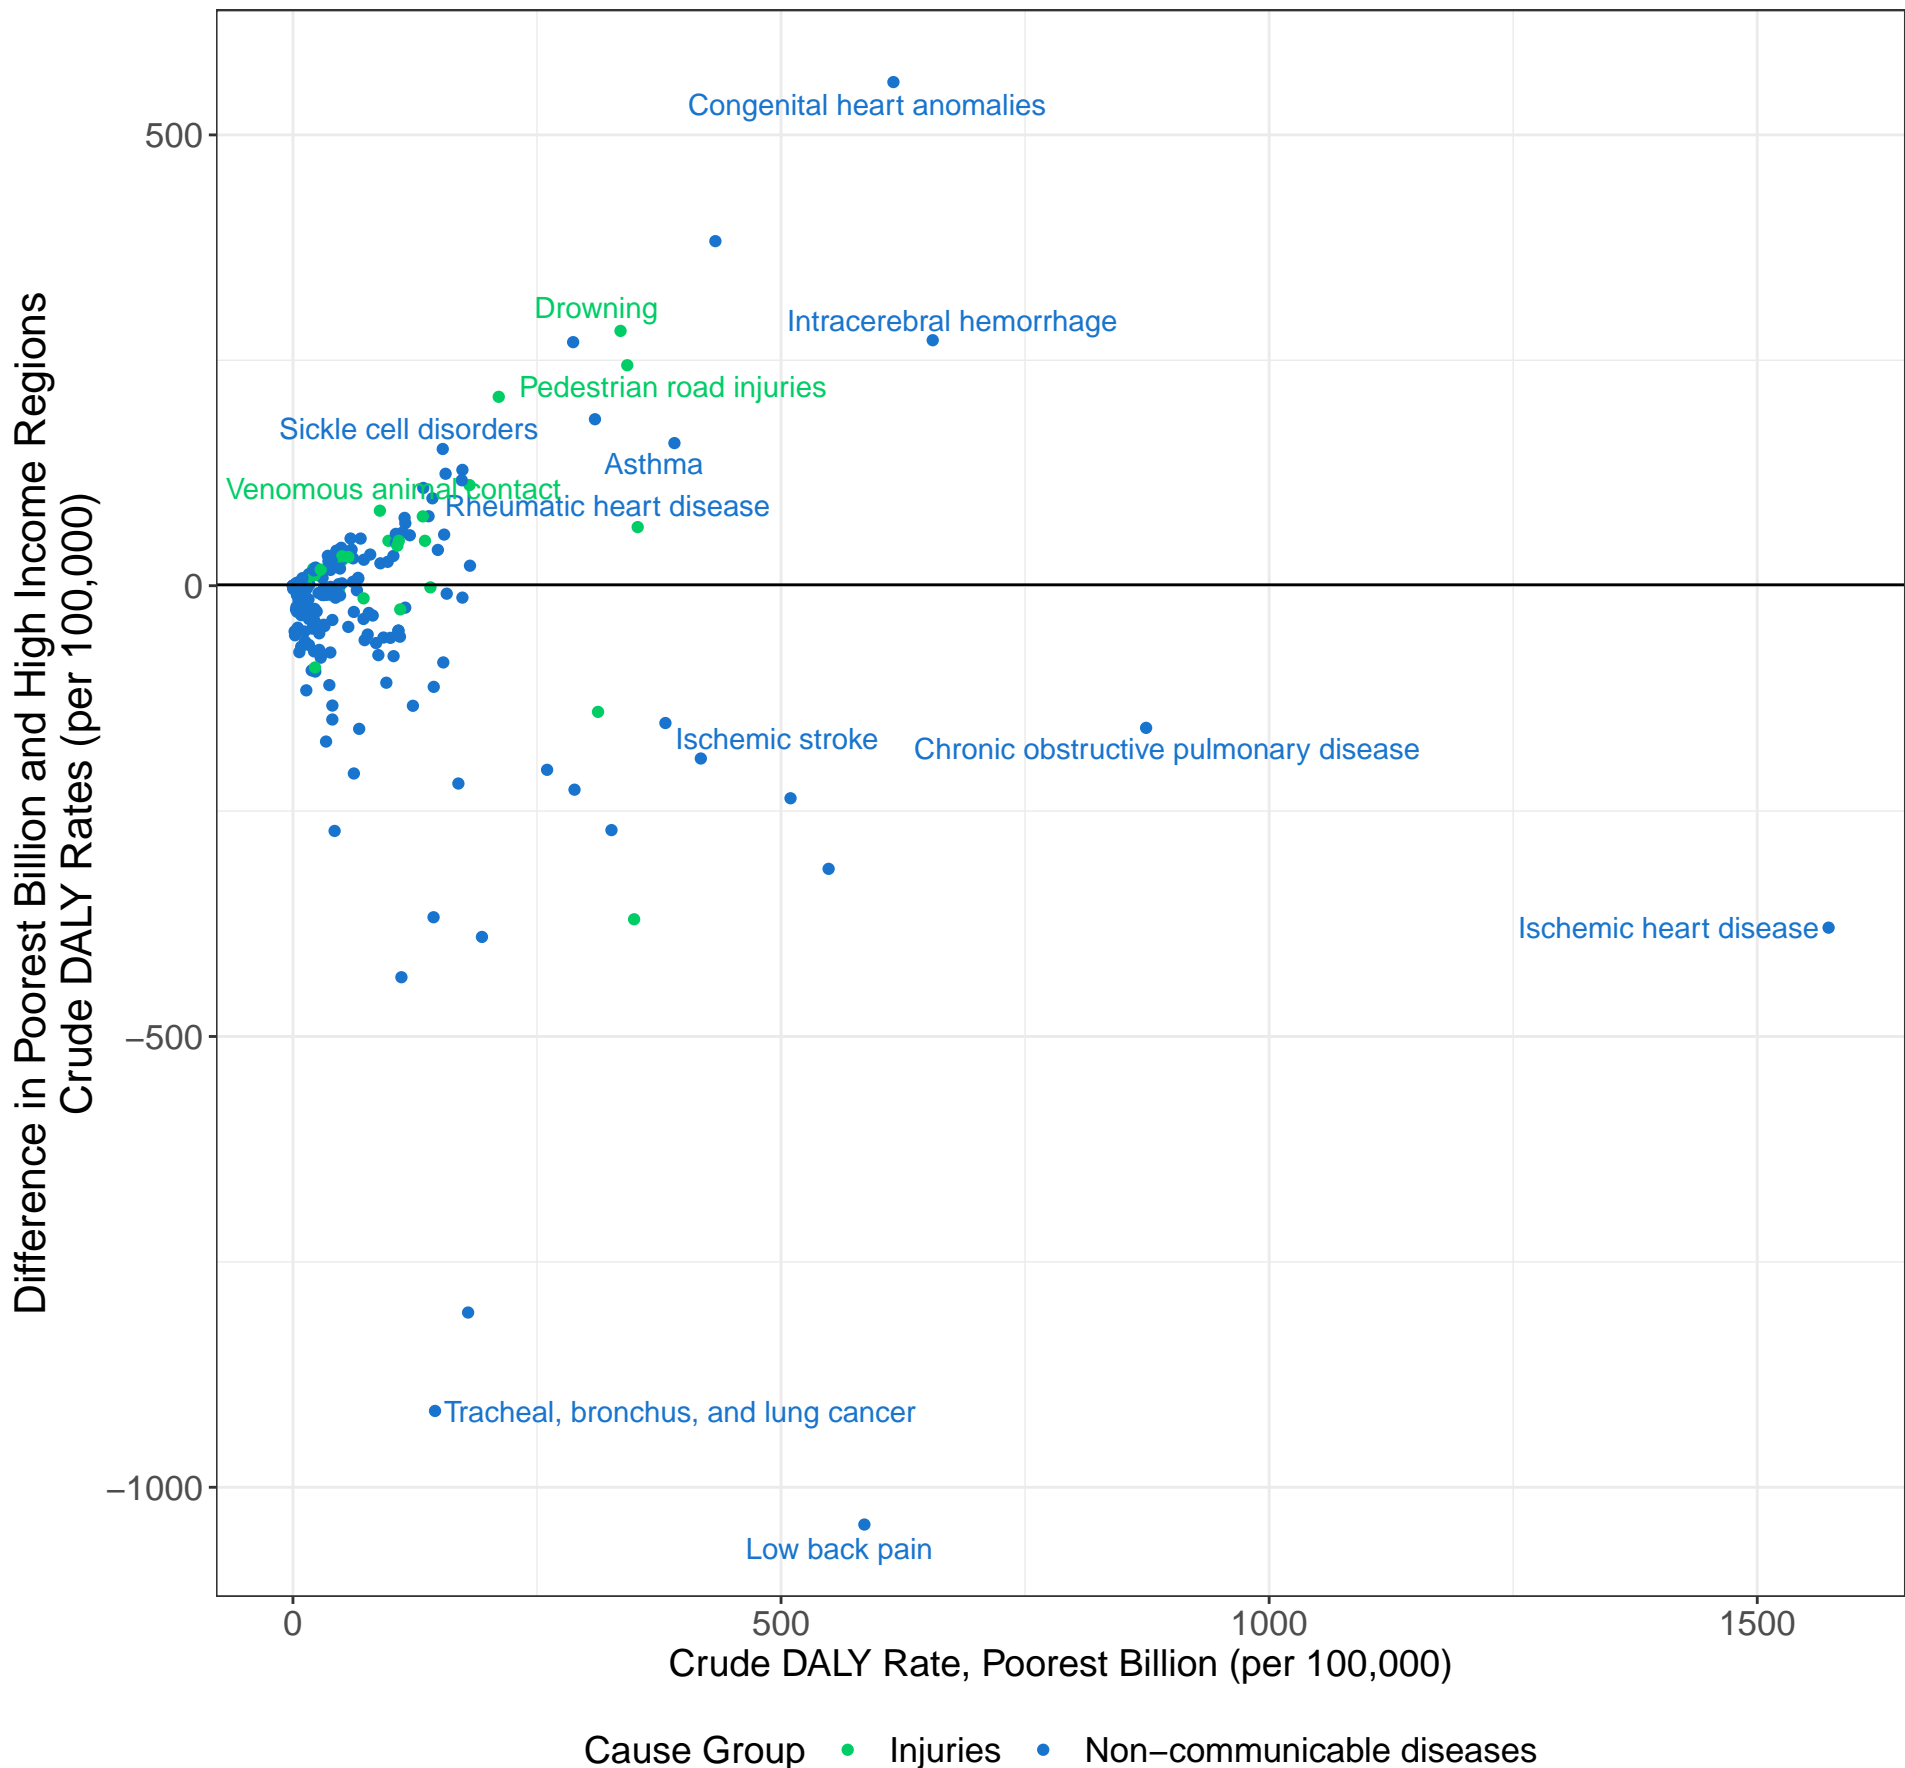

Appendix Figure 8f. Difference between Age-standardized DALY Rates in Poorest Billion and High-income Regions, Poorest Billion Aggregation

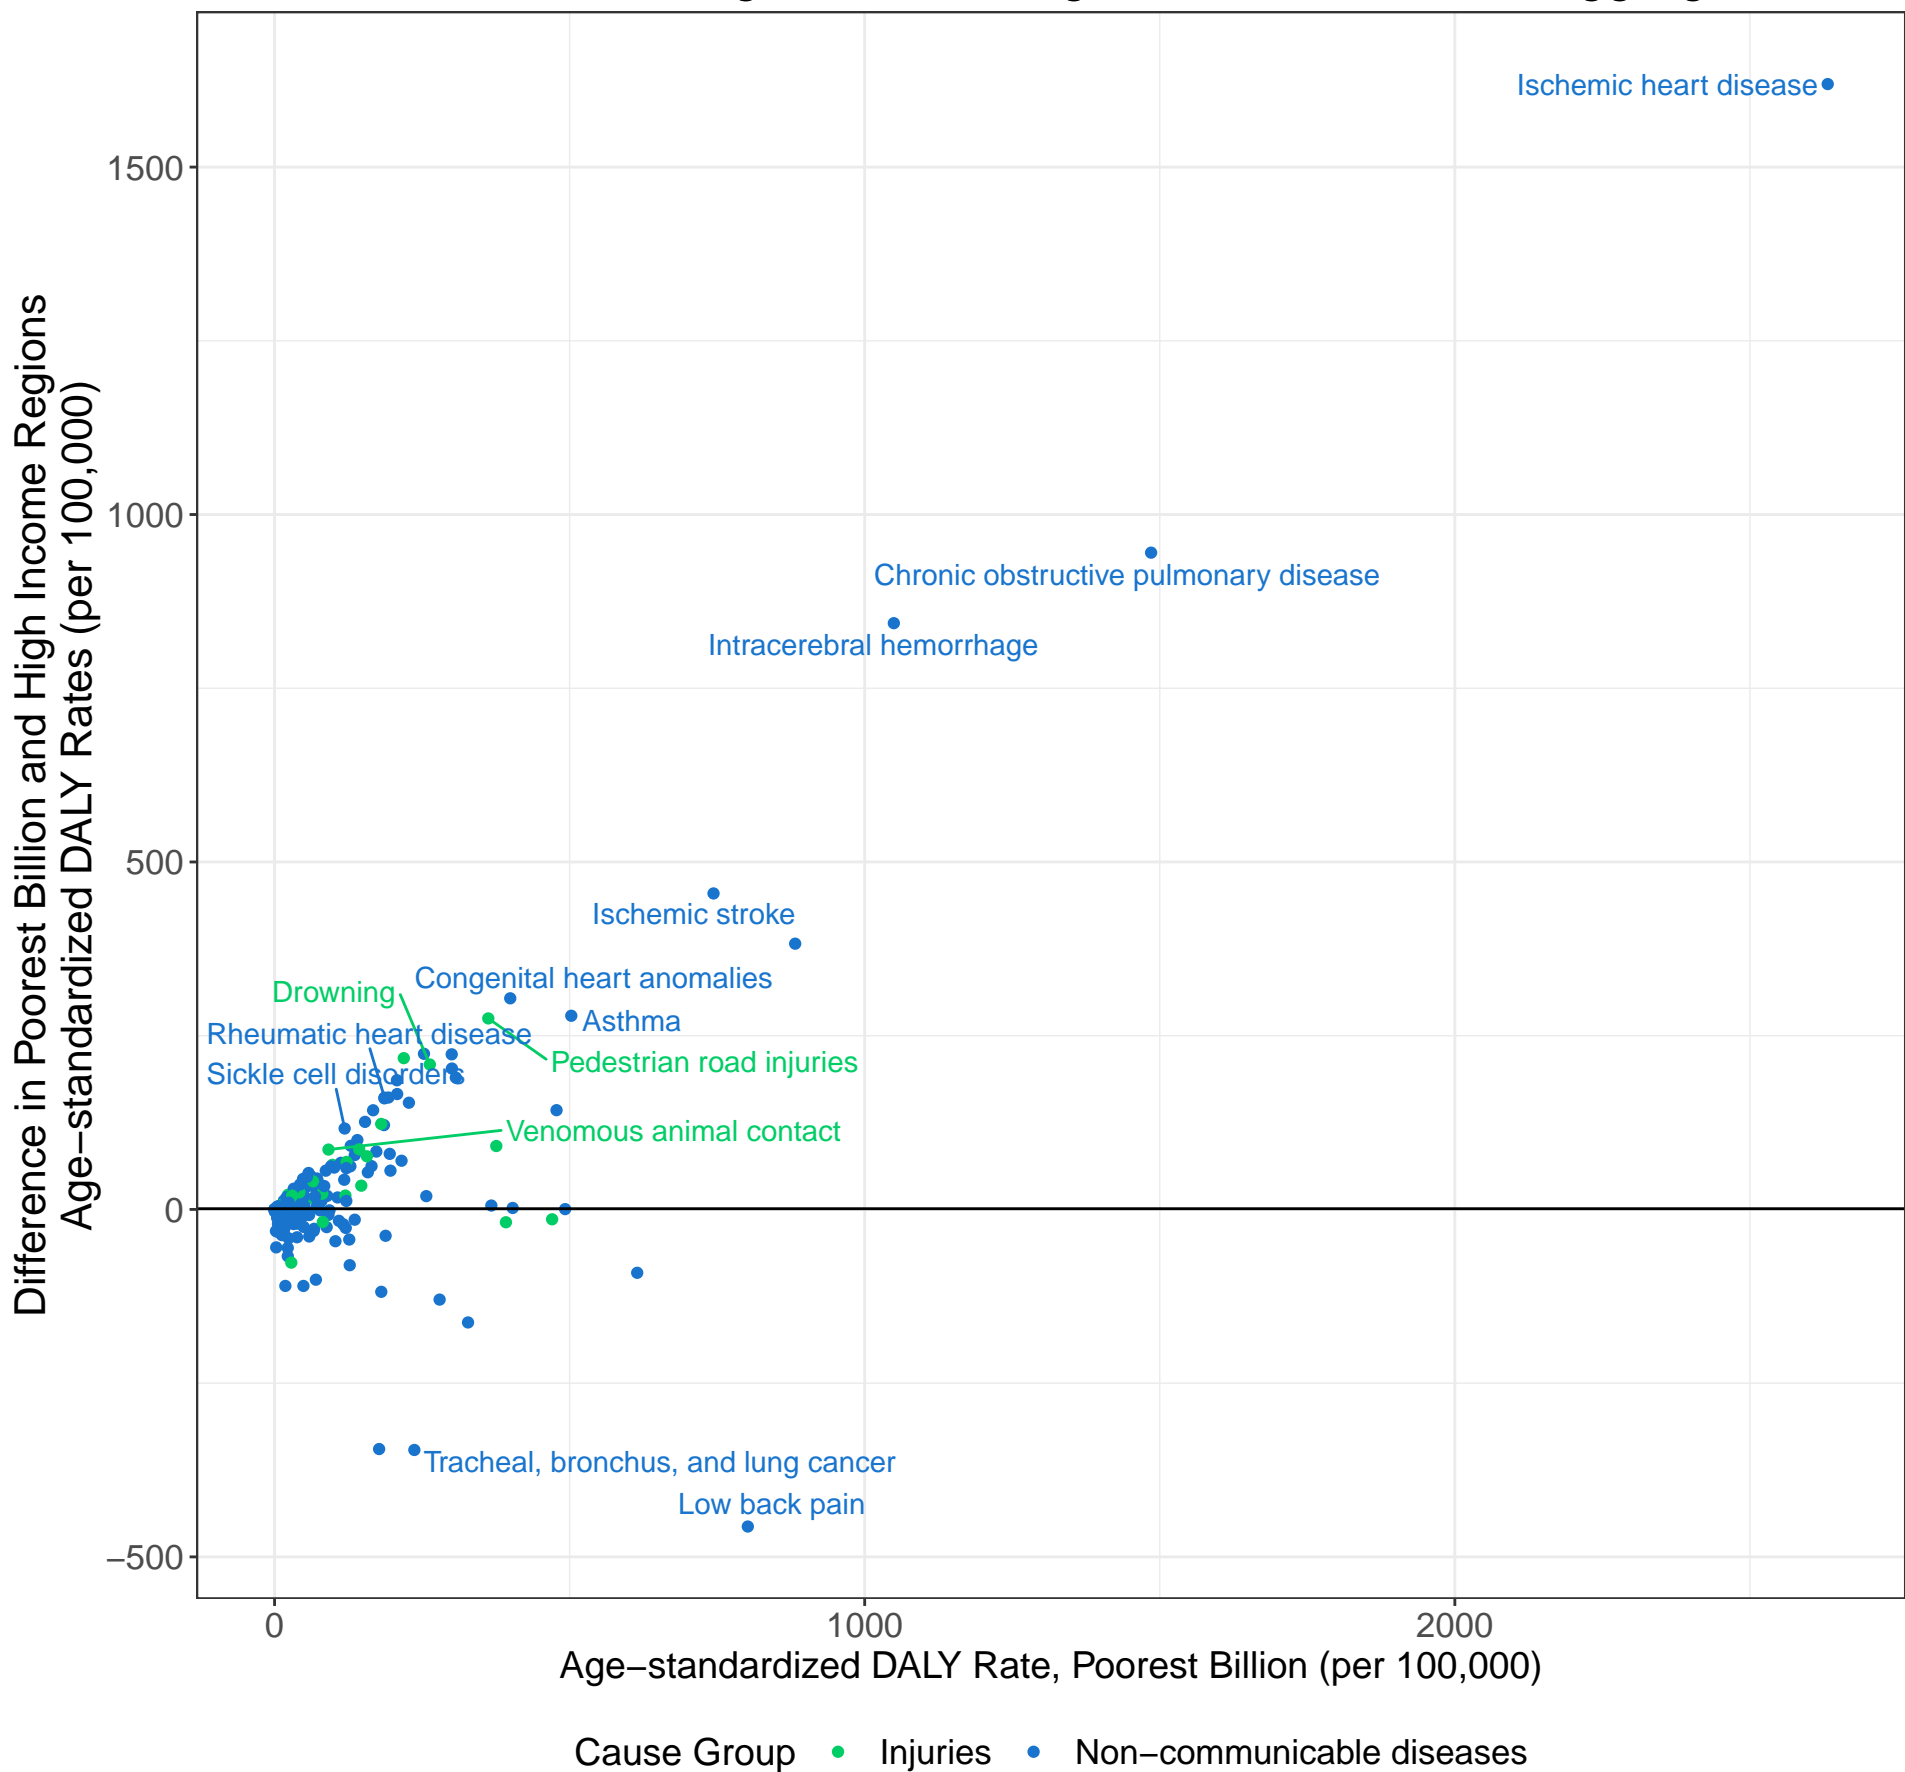

Appendix Figure 8g. Difference between Crude DALY Rates in Poorest Billion and High-income Regions, Country Aggregation

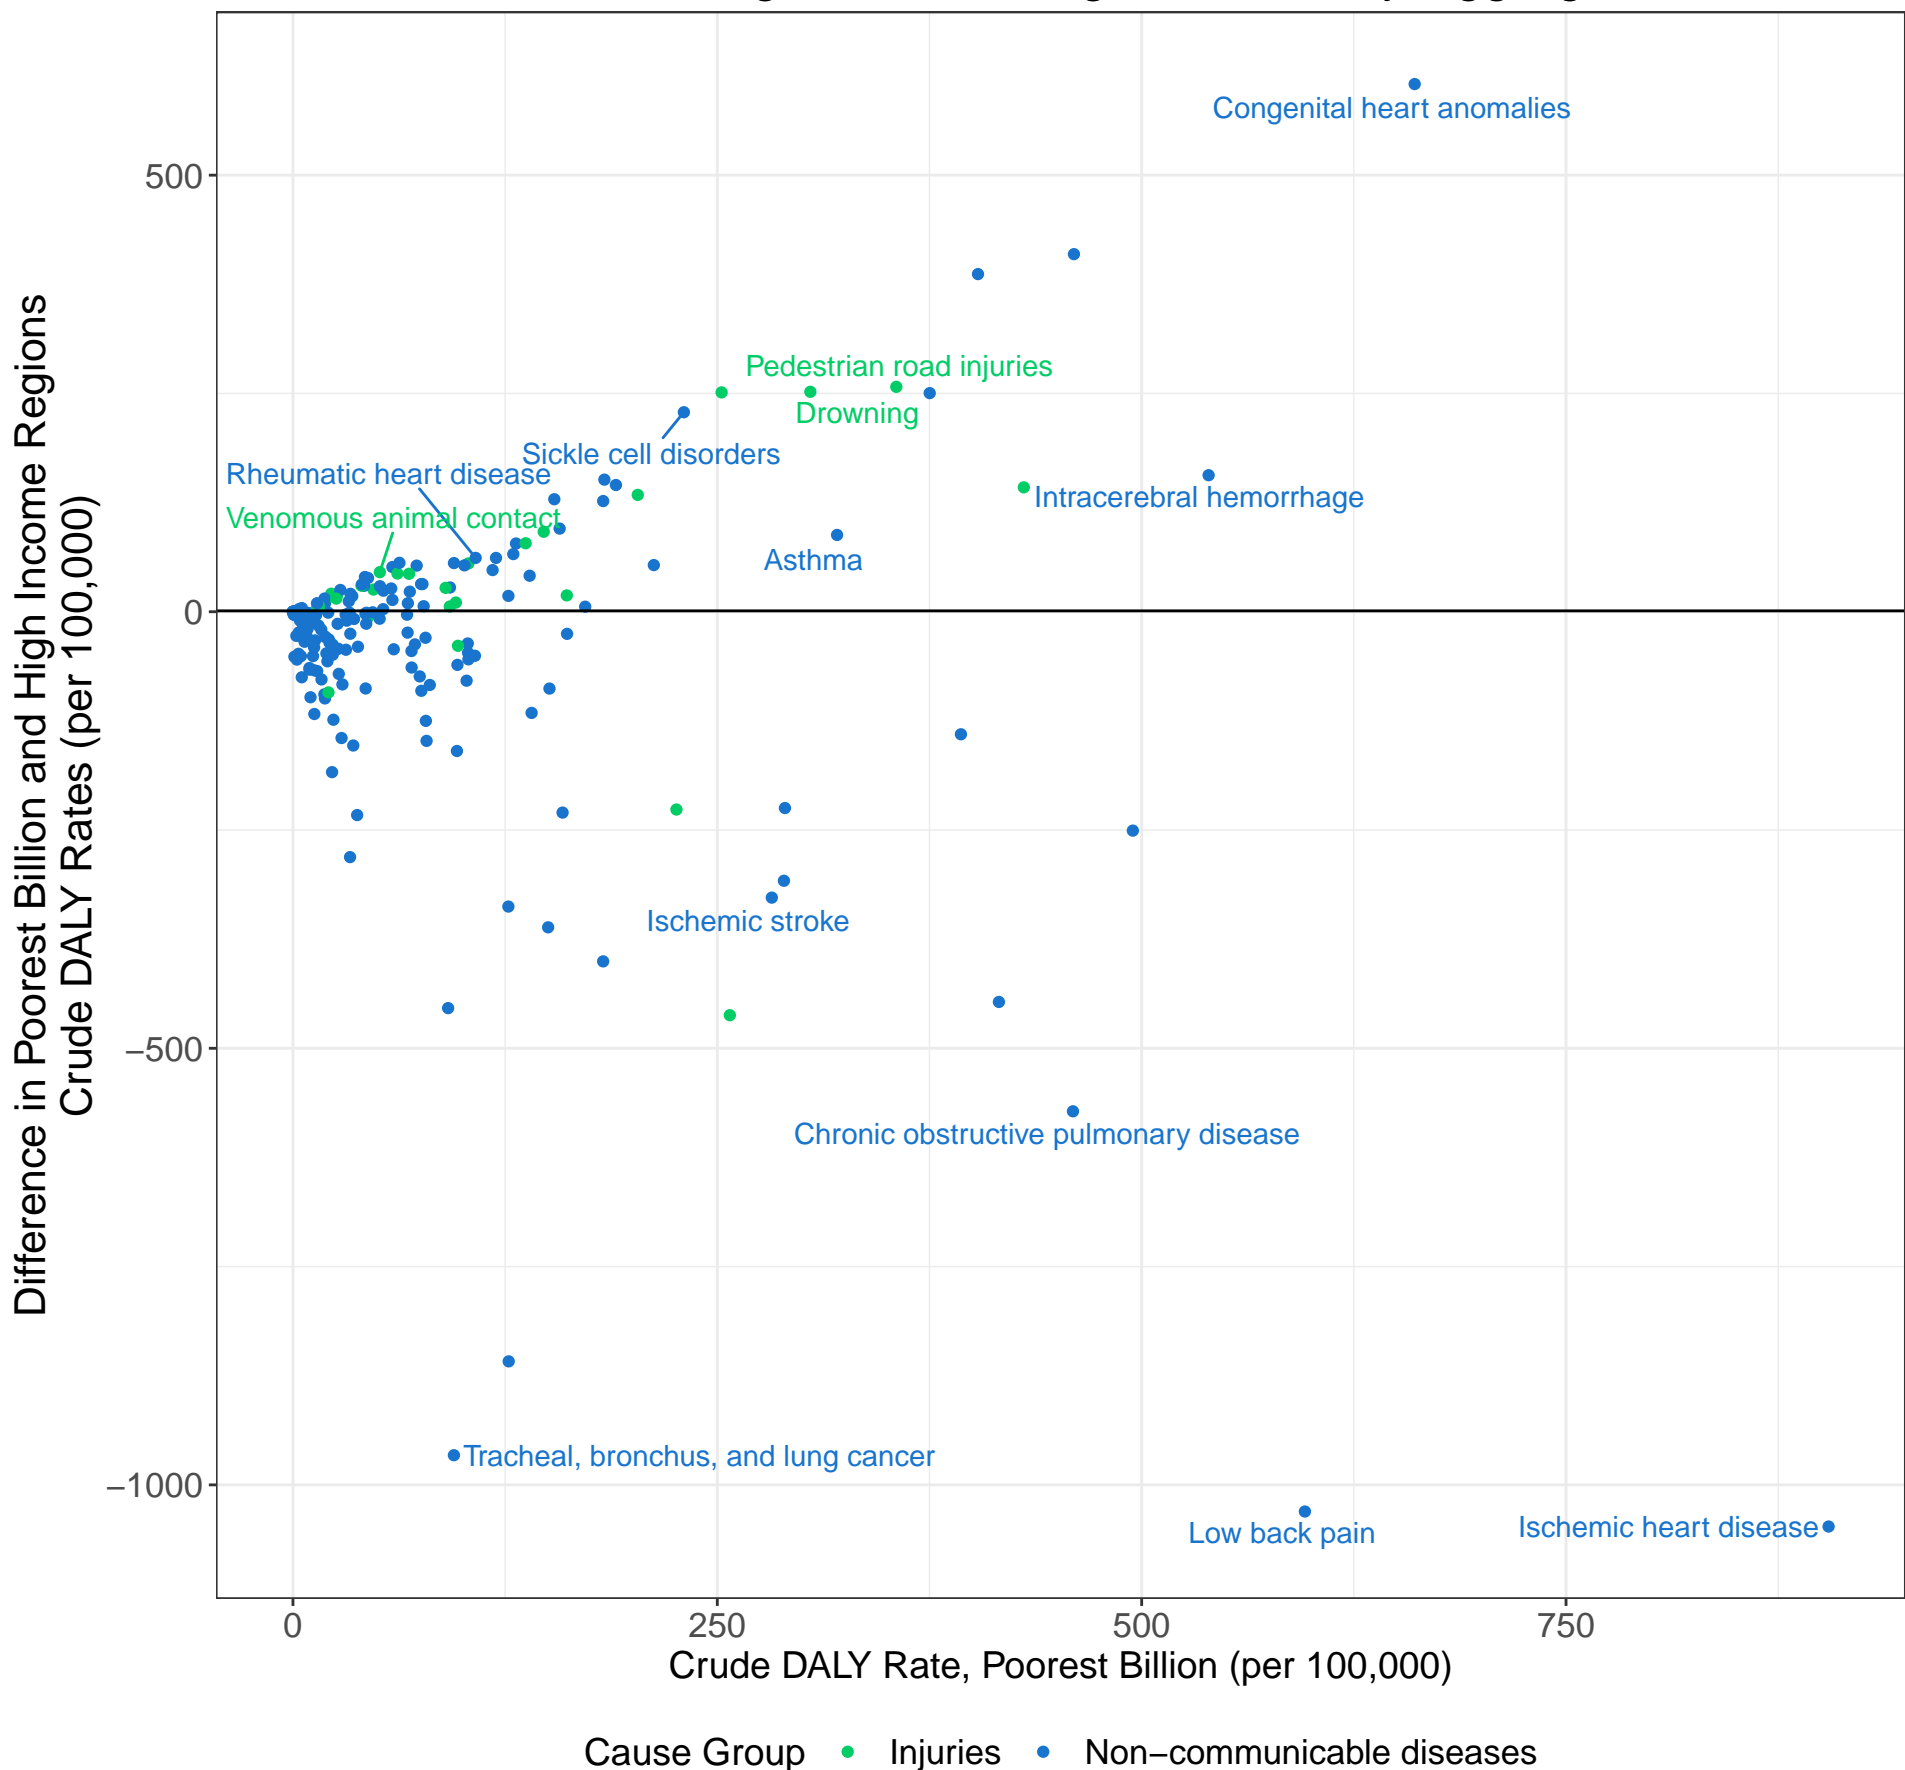

Appendix Figure 8h. Difference between Age-standardized DALY Rates in Poorest Billion and High-income Regions, Country Aggregation

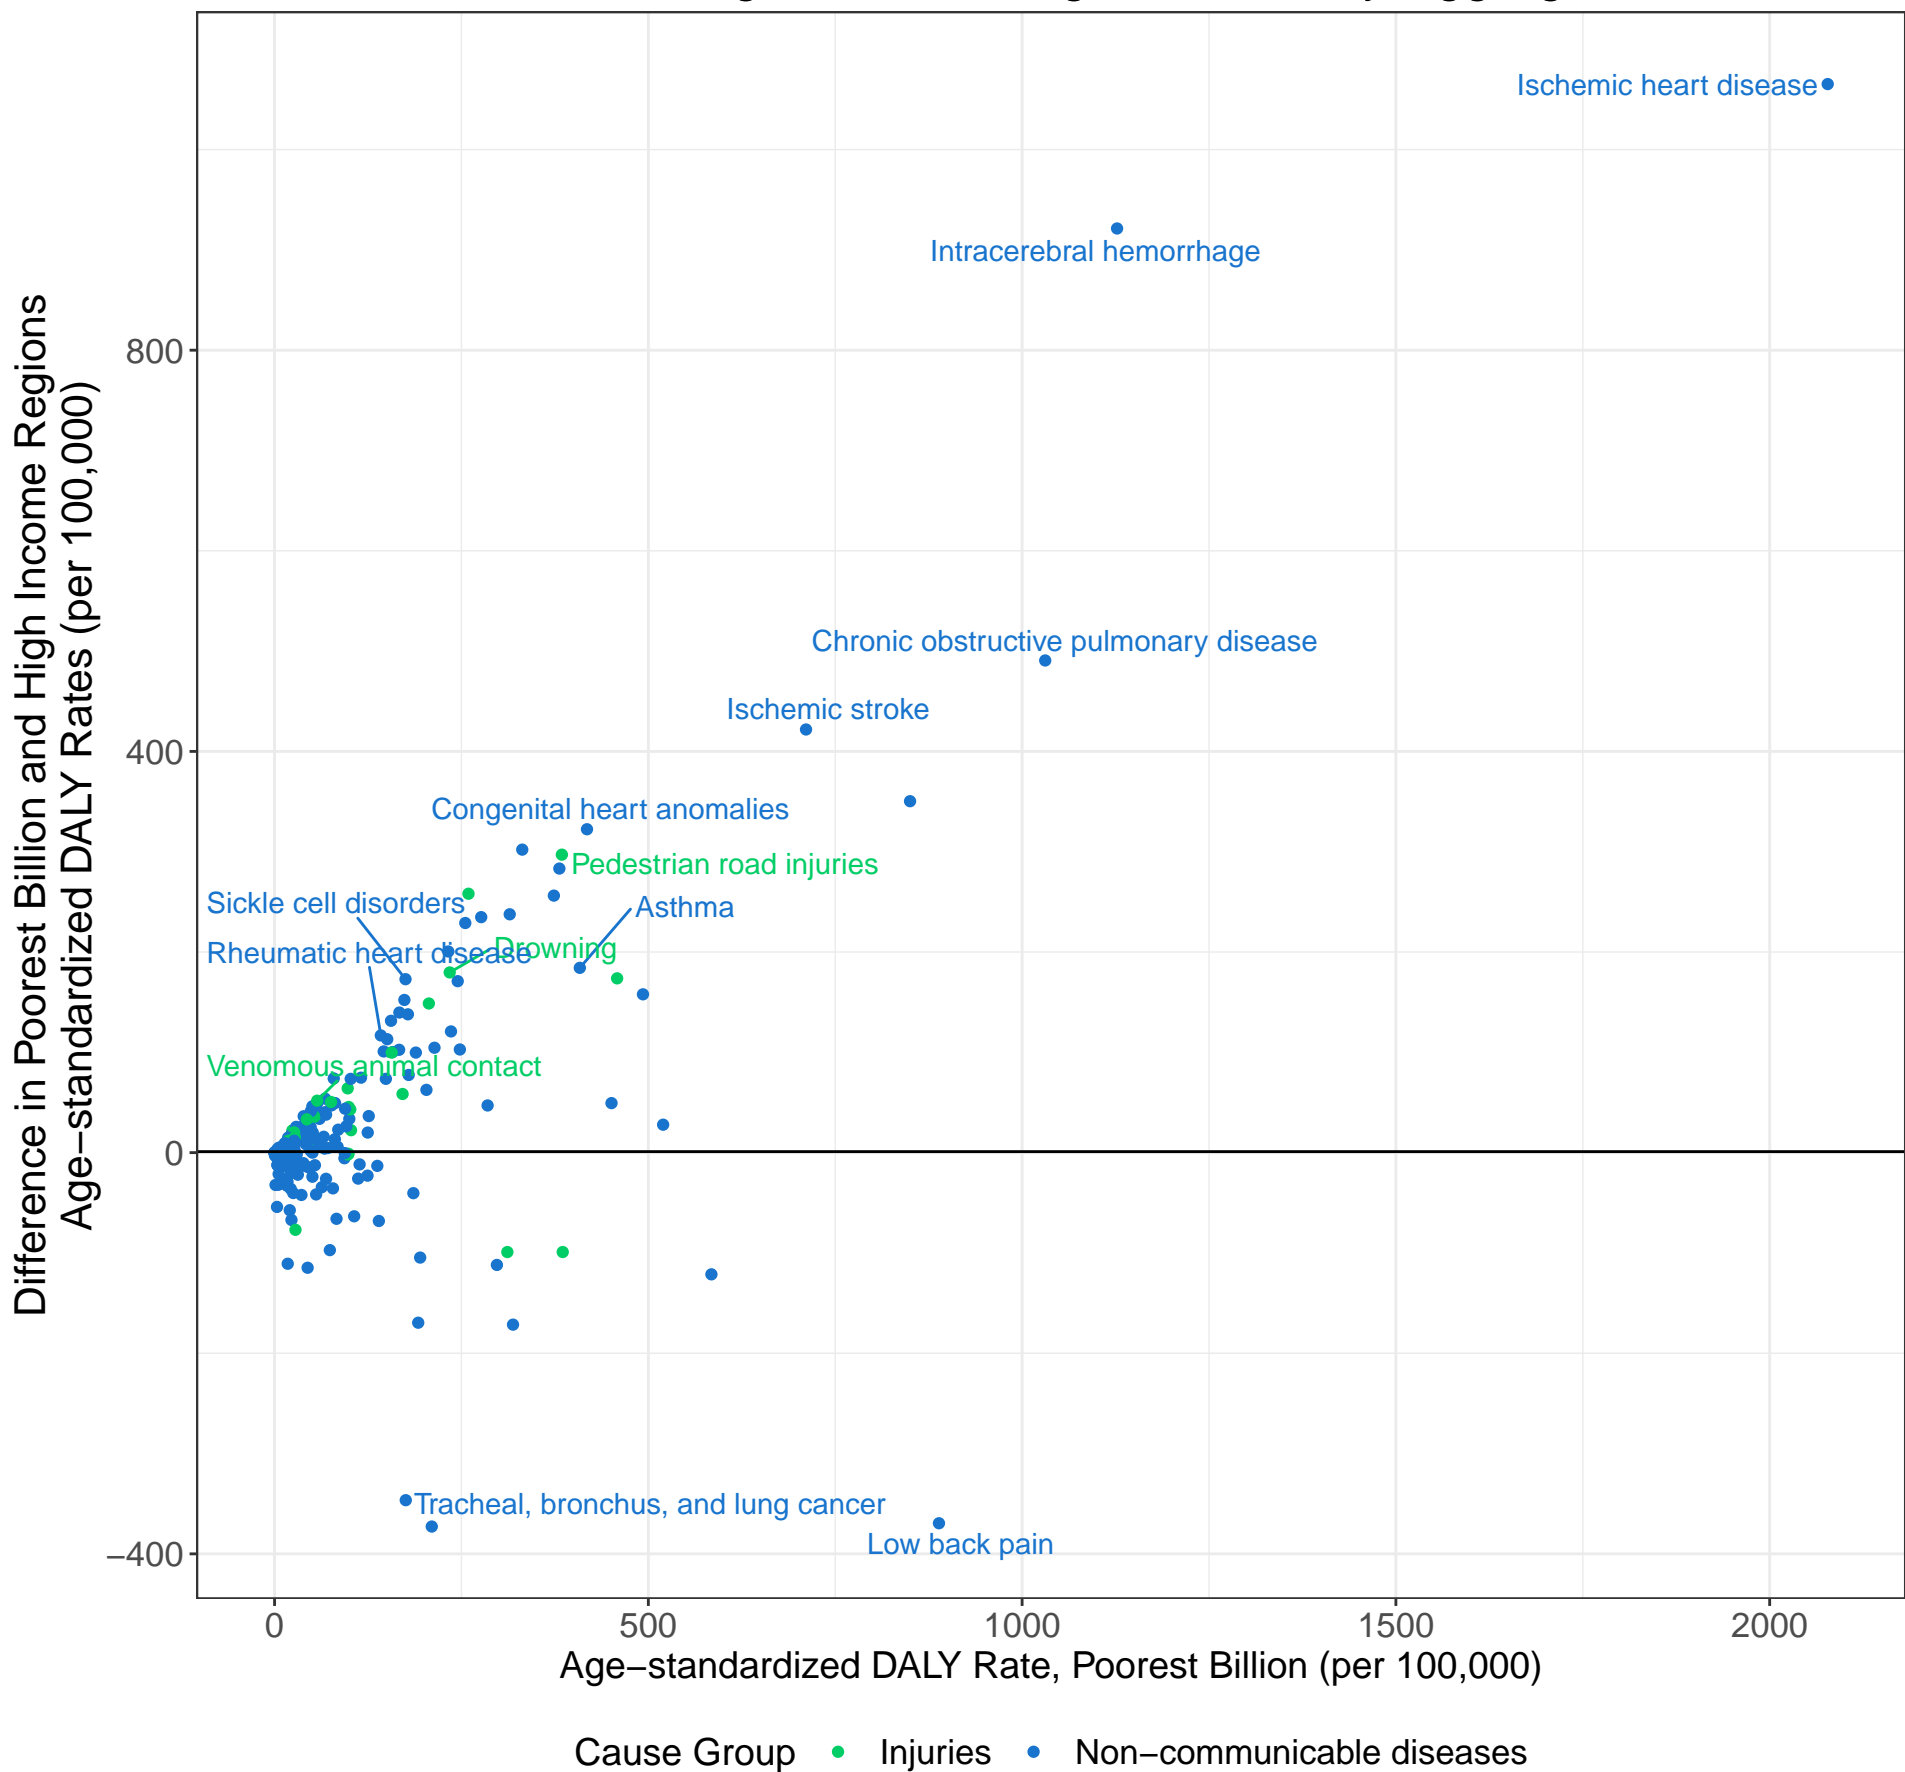

Appendix Figure 8i. Difference between Crude DALY Rates in Low-income and High-income Regions

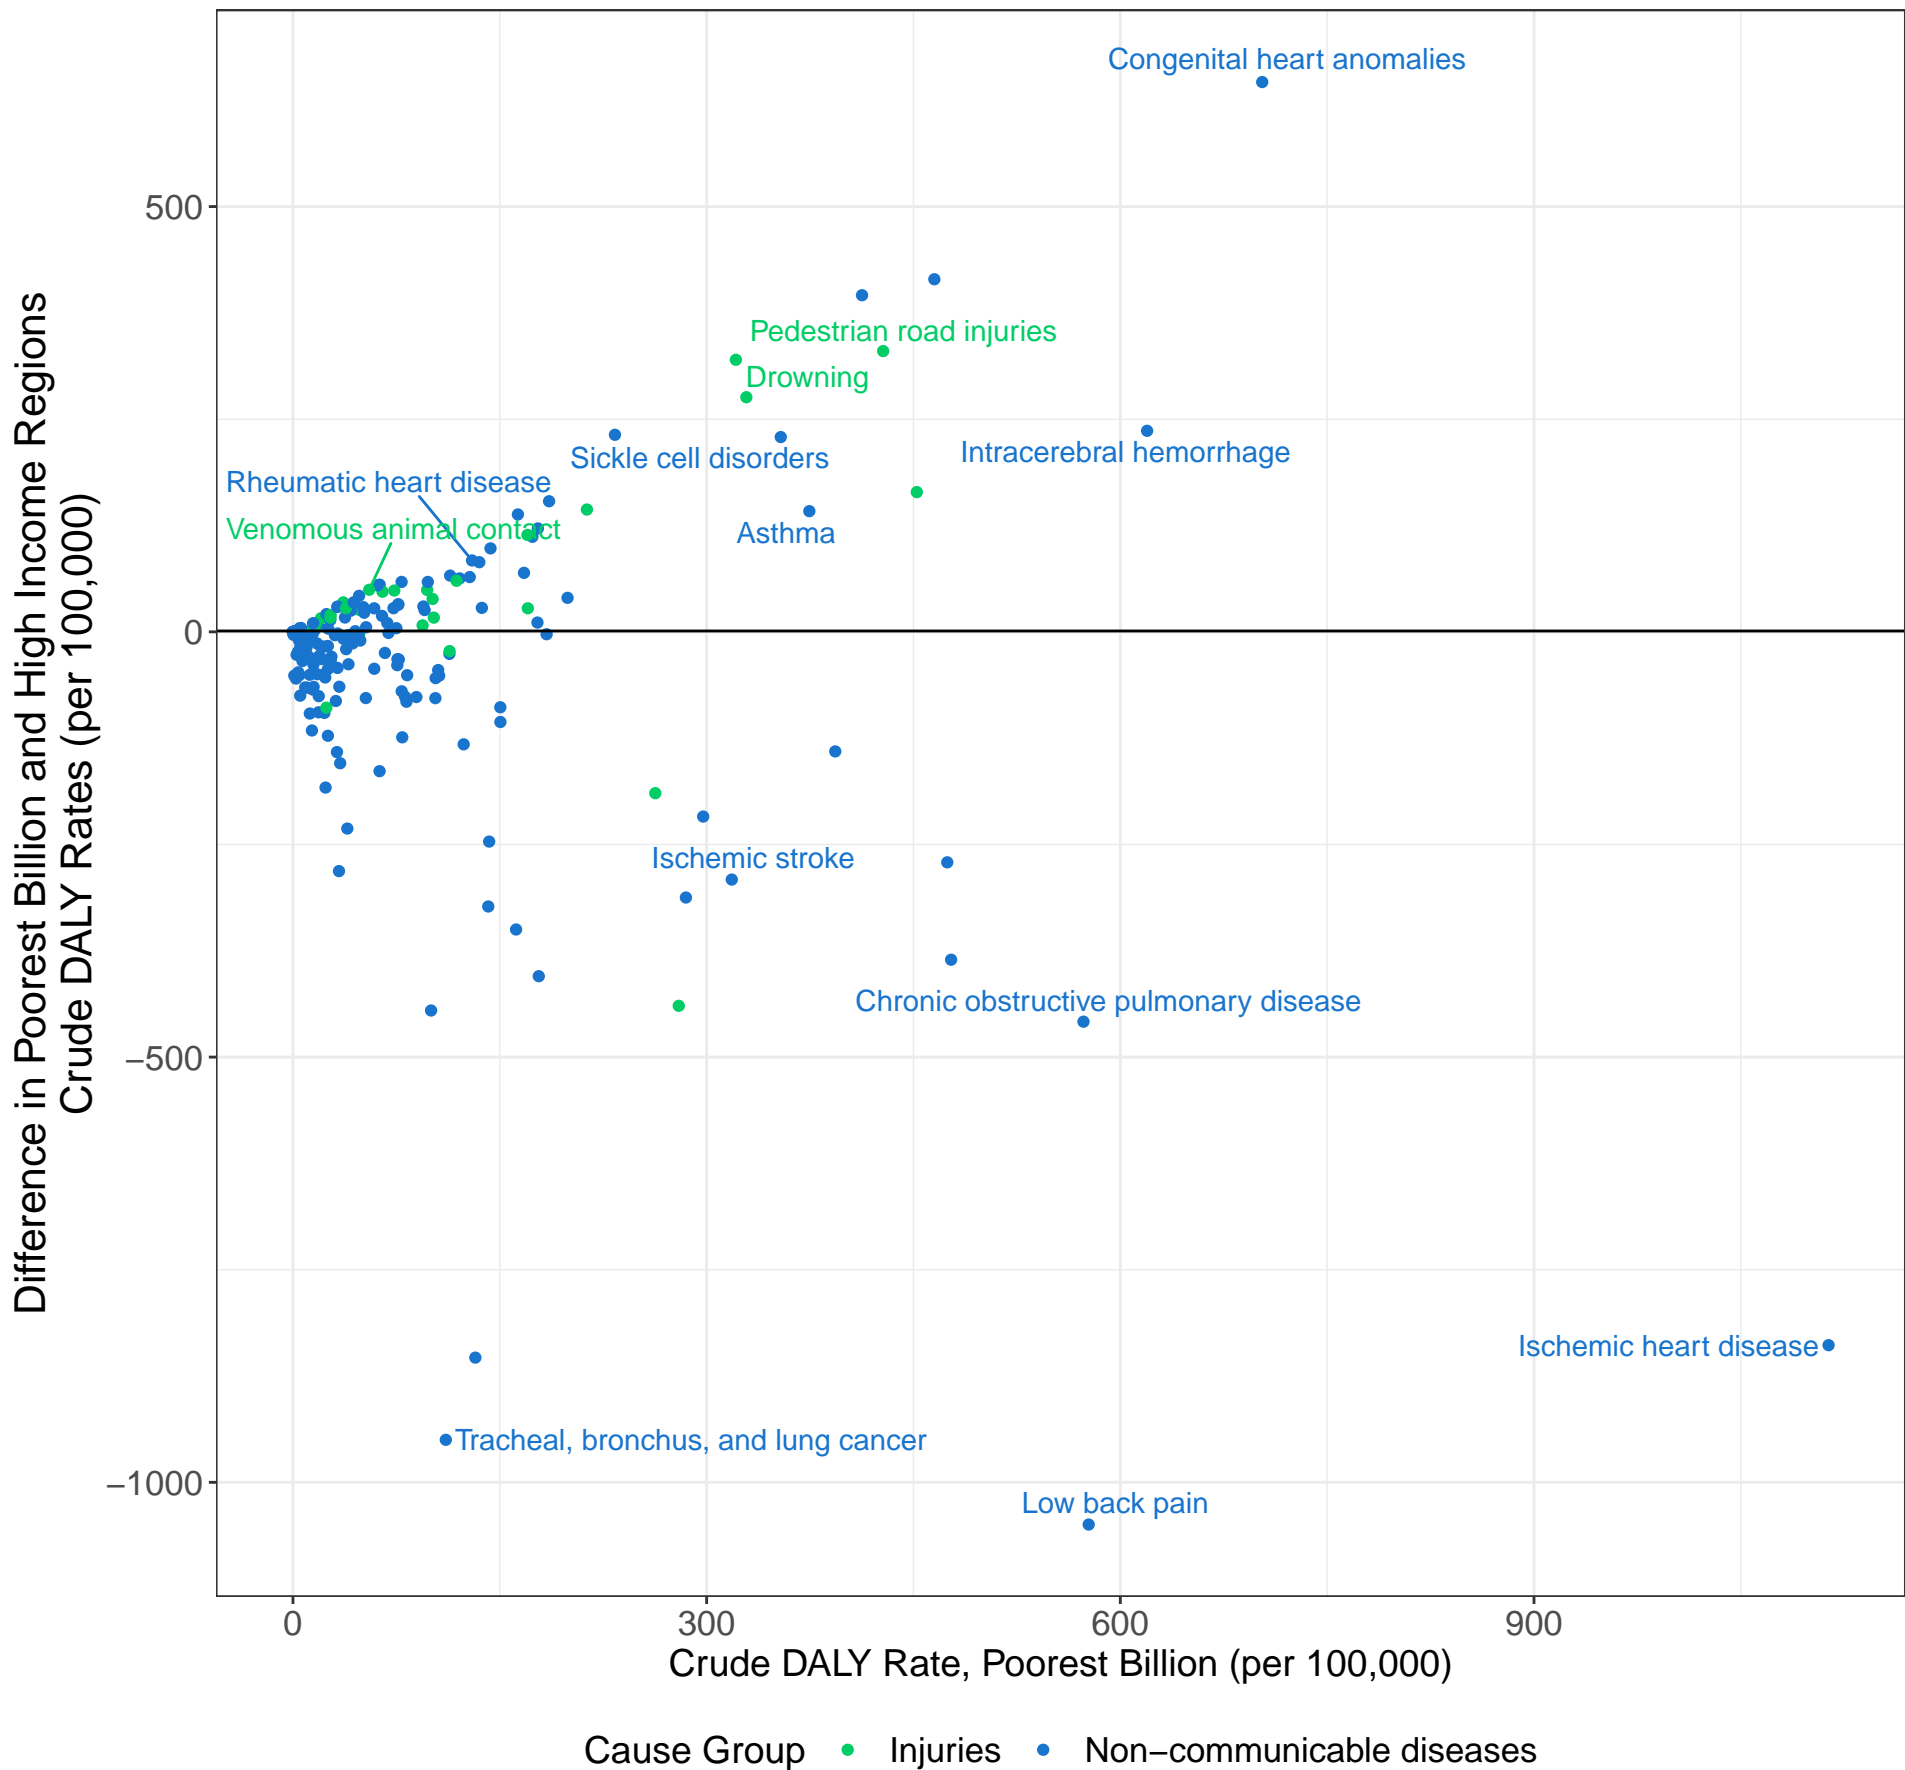

Appendix Figure 8j. Difference between Age-standardized DALY Rates in Low-income and High-income Regions

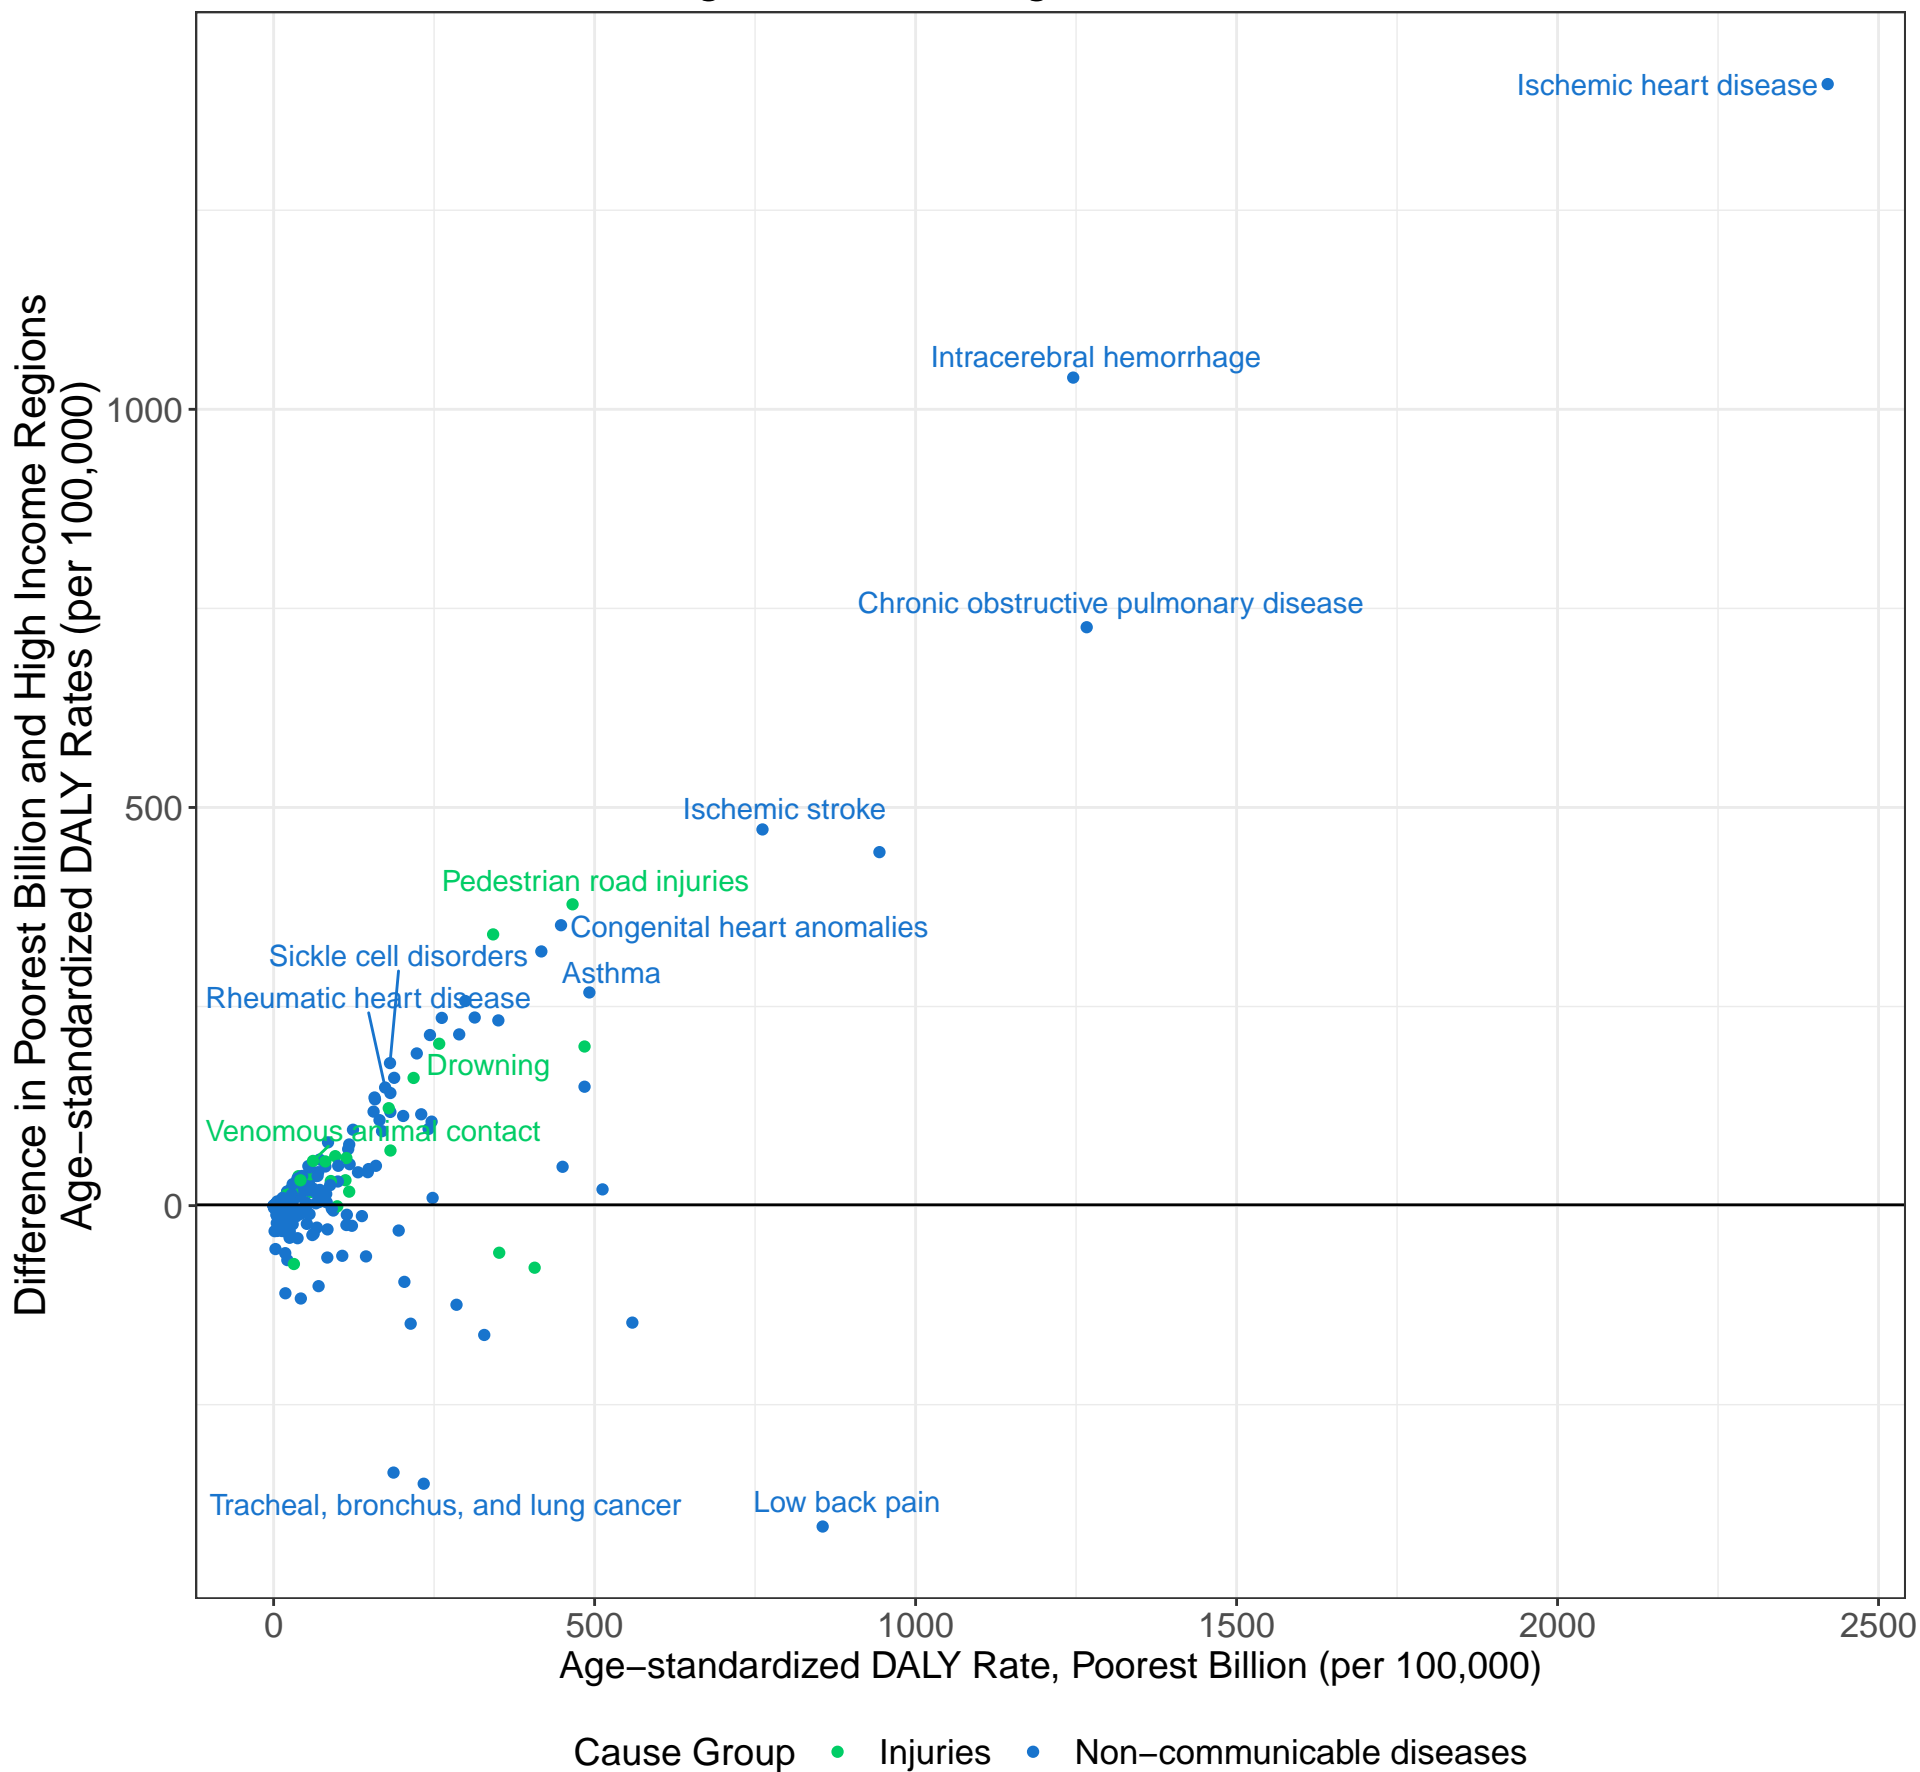

Appendix Figure 9a. Difference between Crude YLL Rates in Poorest Billion and High-income Regions, Selective Ecological Approach

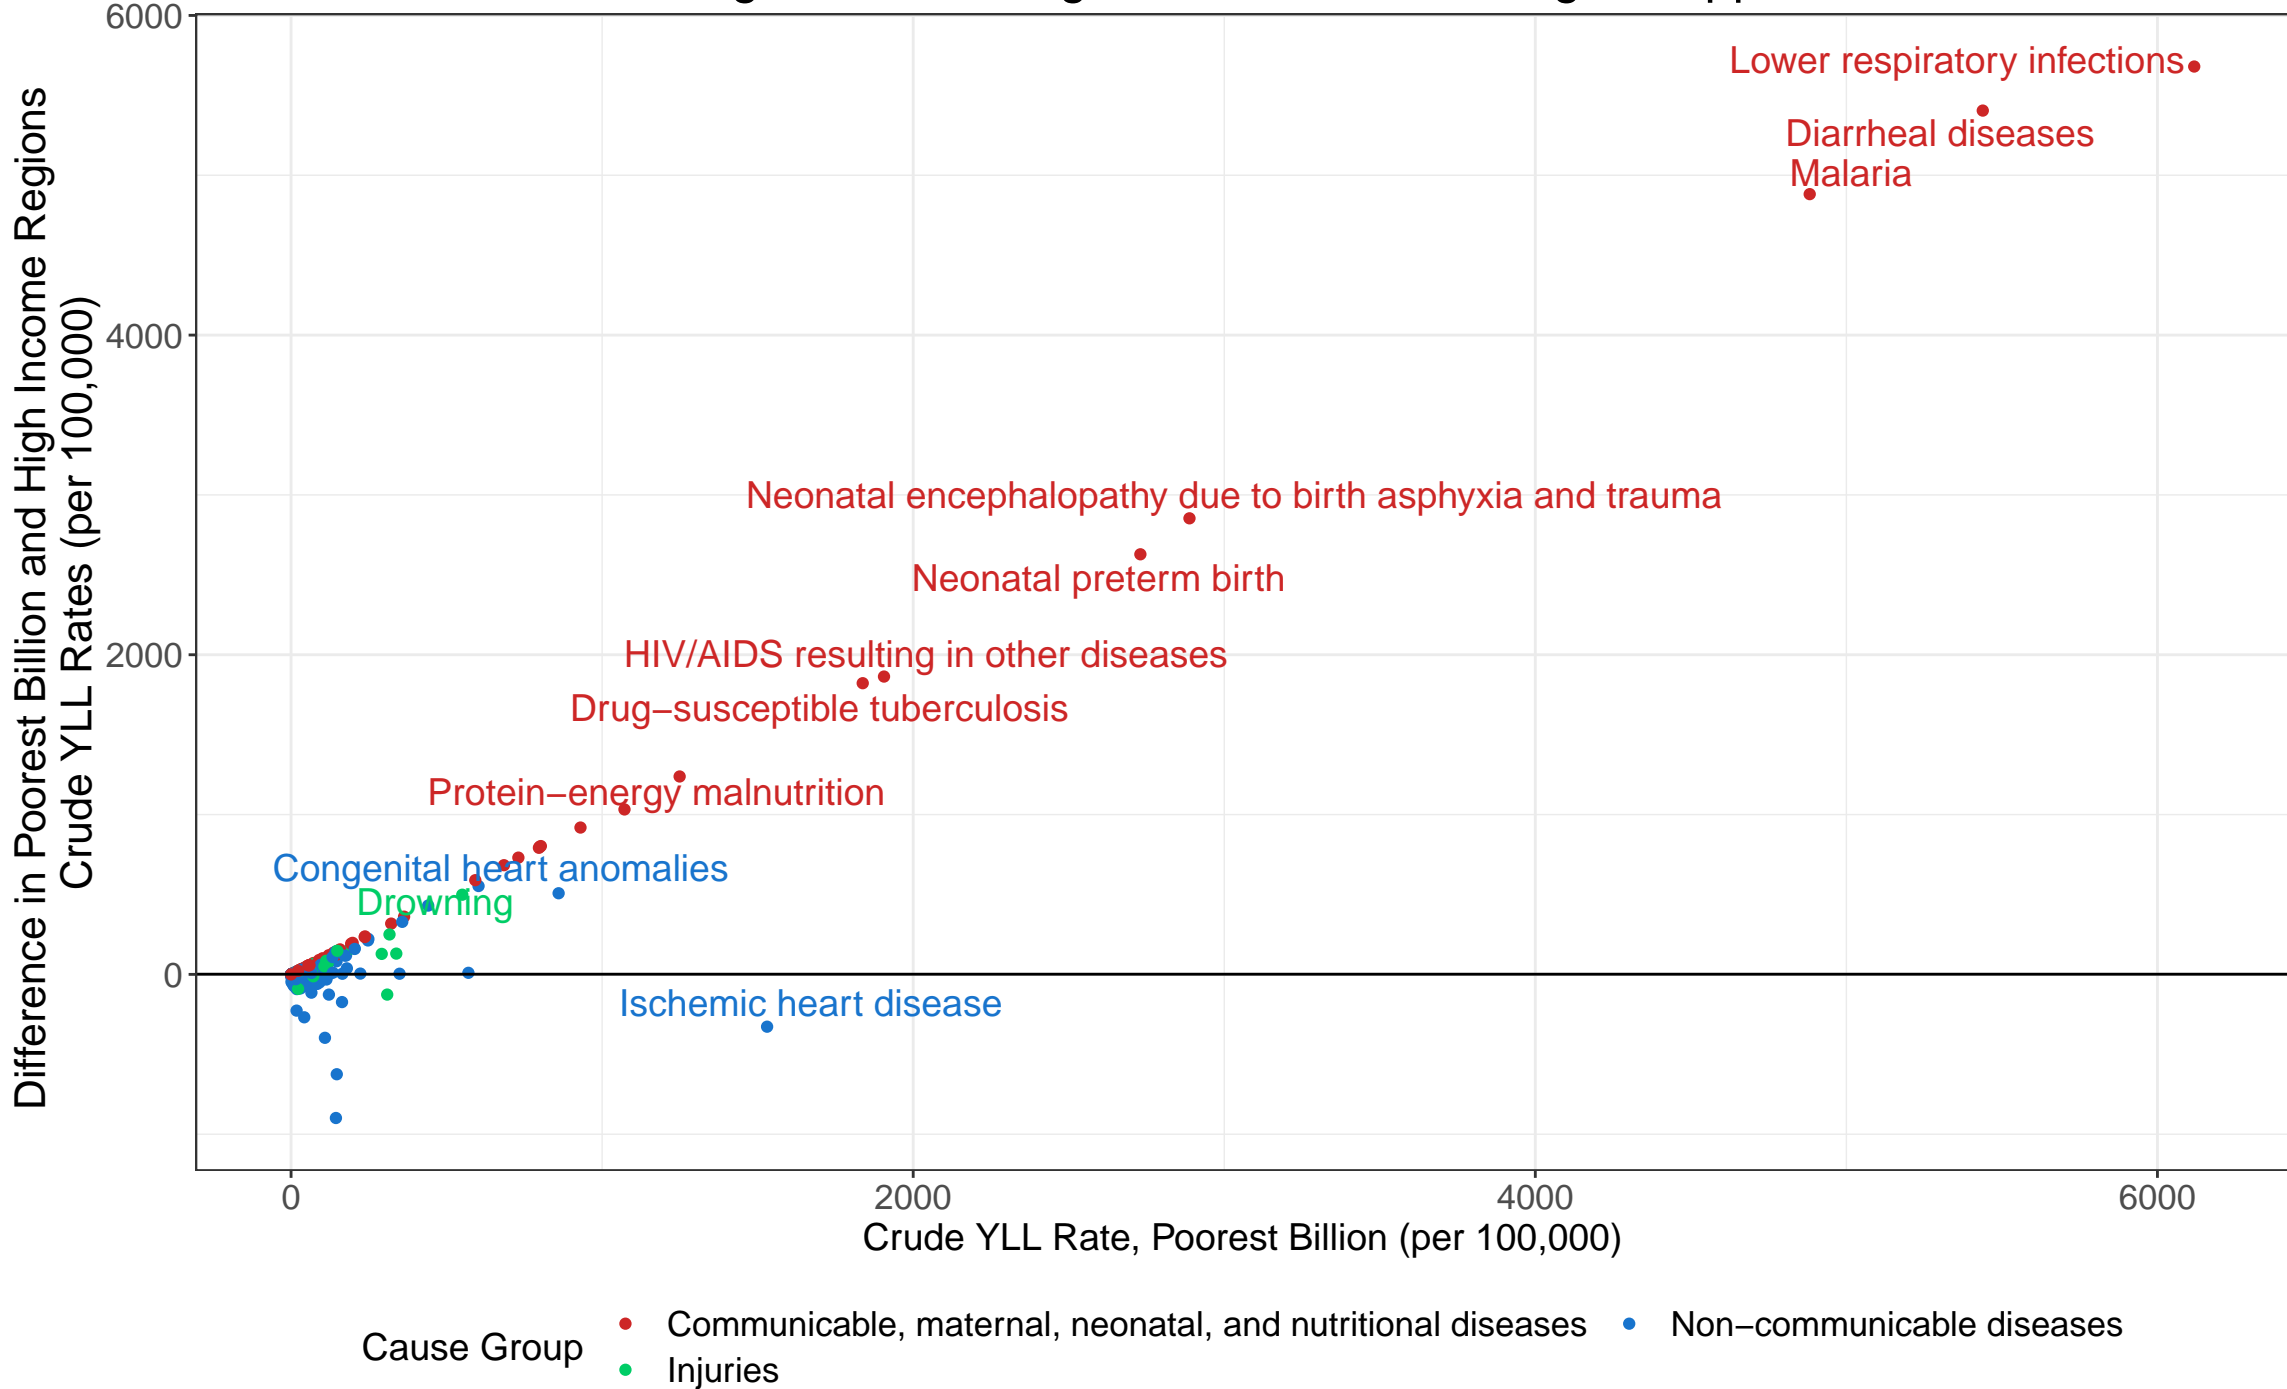

Appendix Figure 9b. Difference between Age-standardized YLL Rates in Poorest Billion and High-income Regions, Selective Ecological Approach

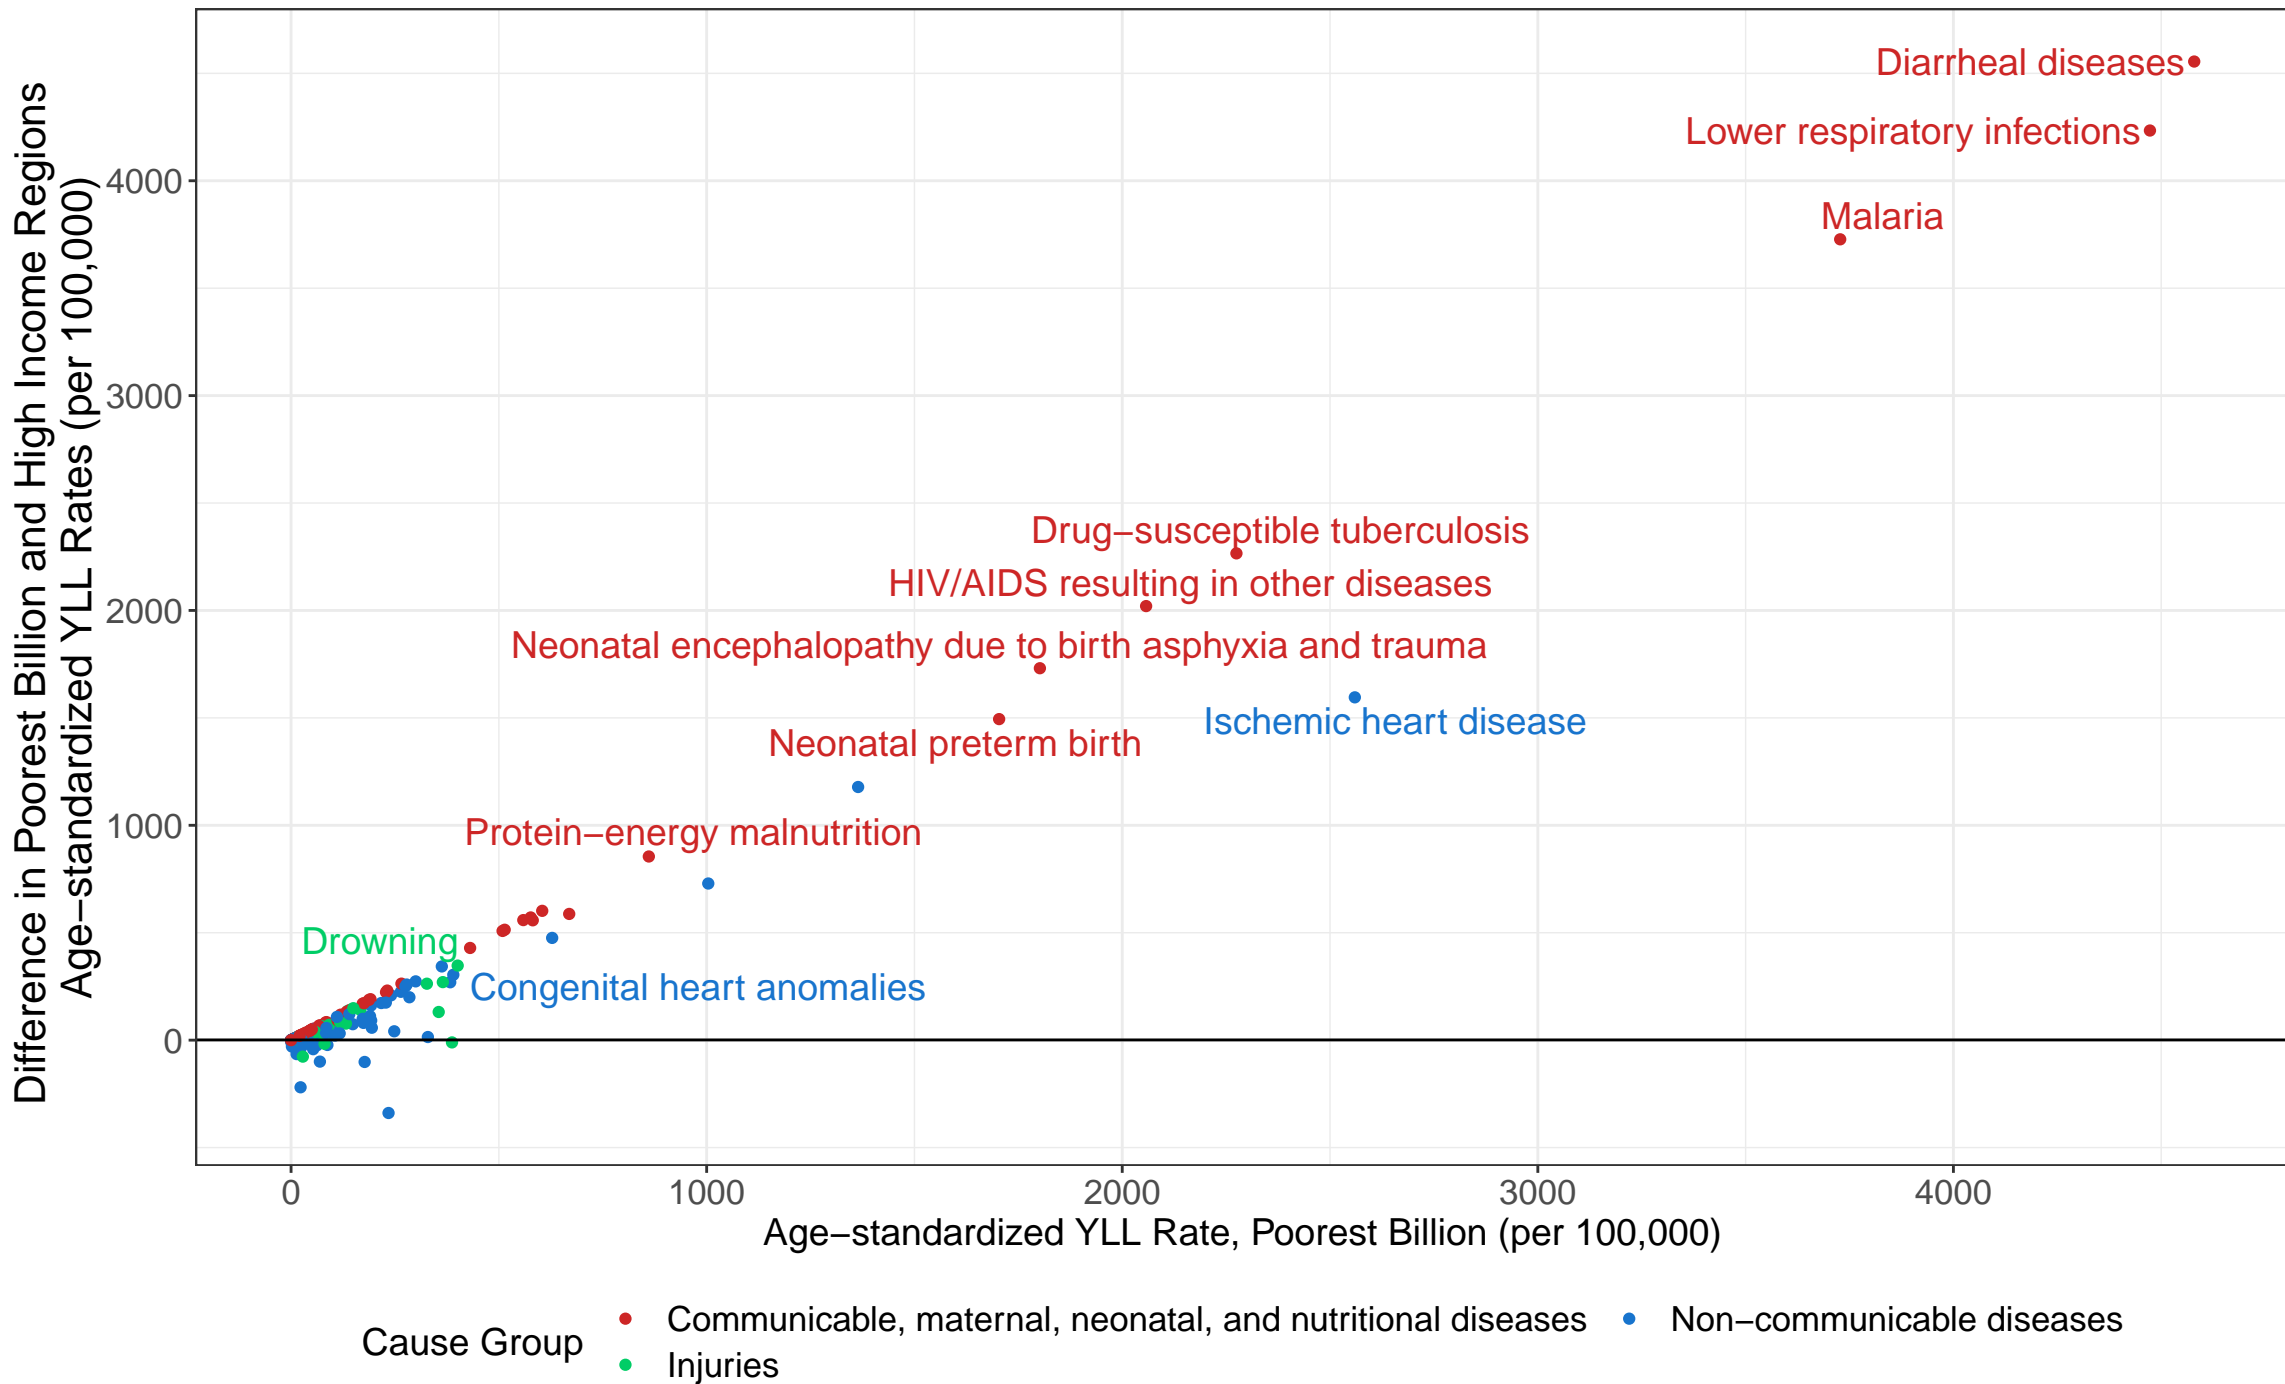



Appendix Figure 9c. Difference between Crude YLL Rates in Poorest Billion and High-income Regions, Full Ecological Approach

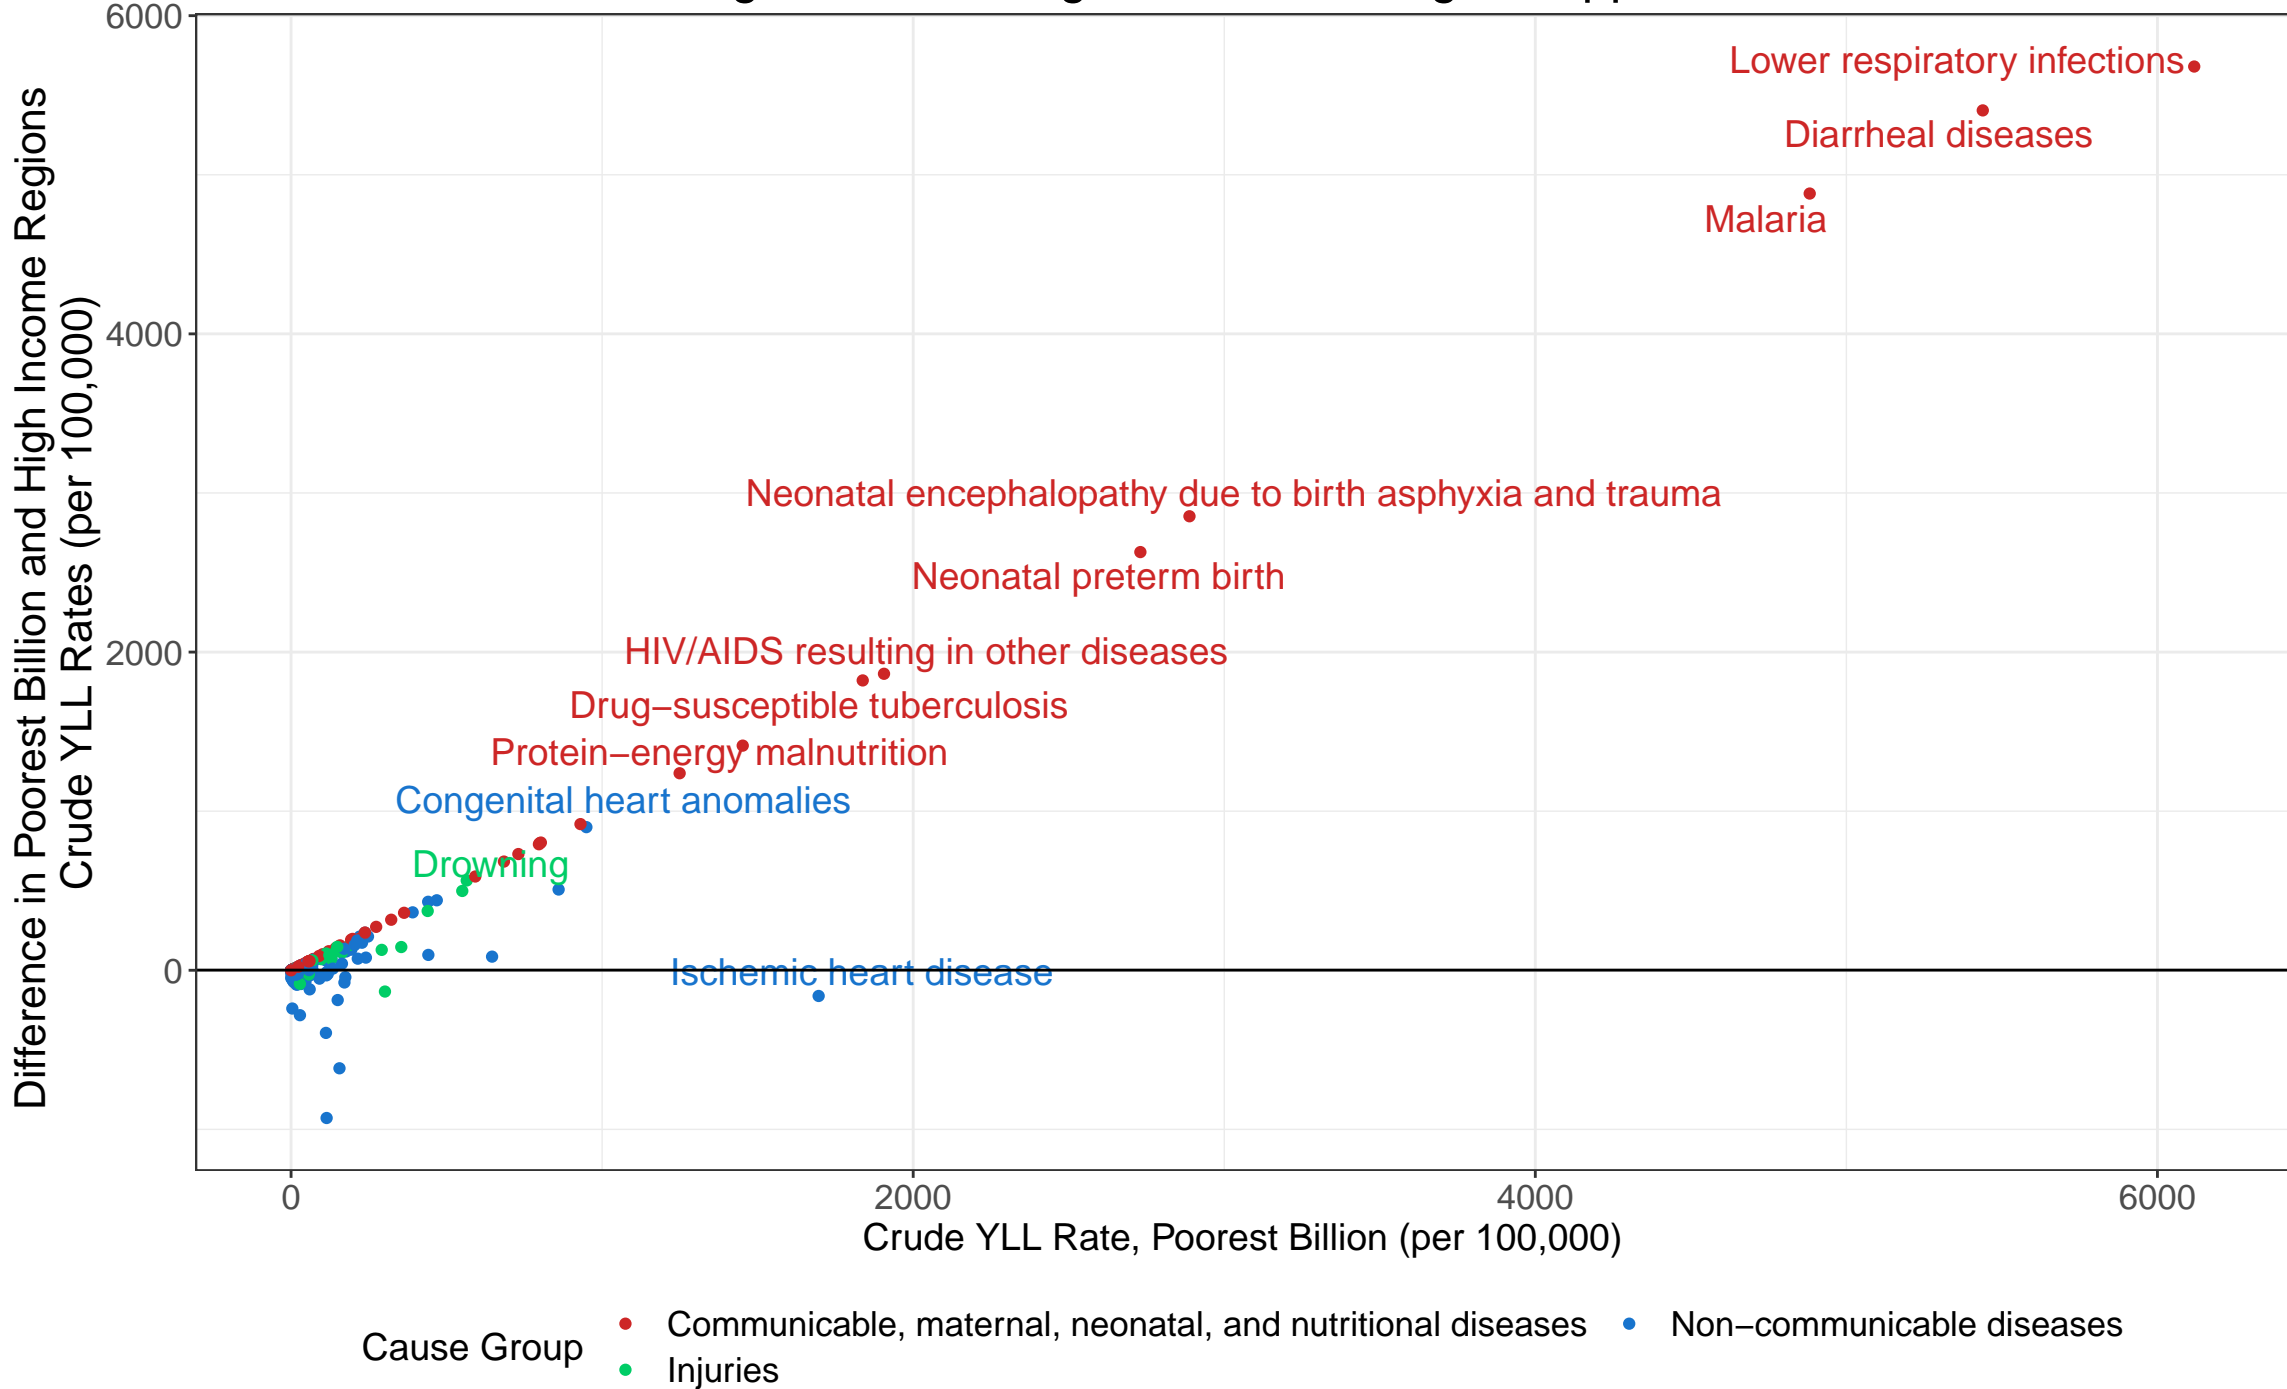

Appendix Figure 9d. Difference between Age-standardized YLL Rates in Poorest Billion and High-income Regions, Full Ecological Approach

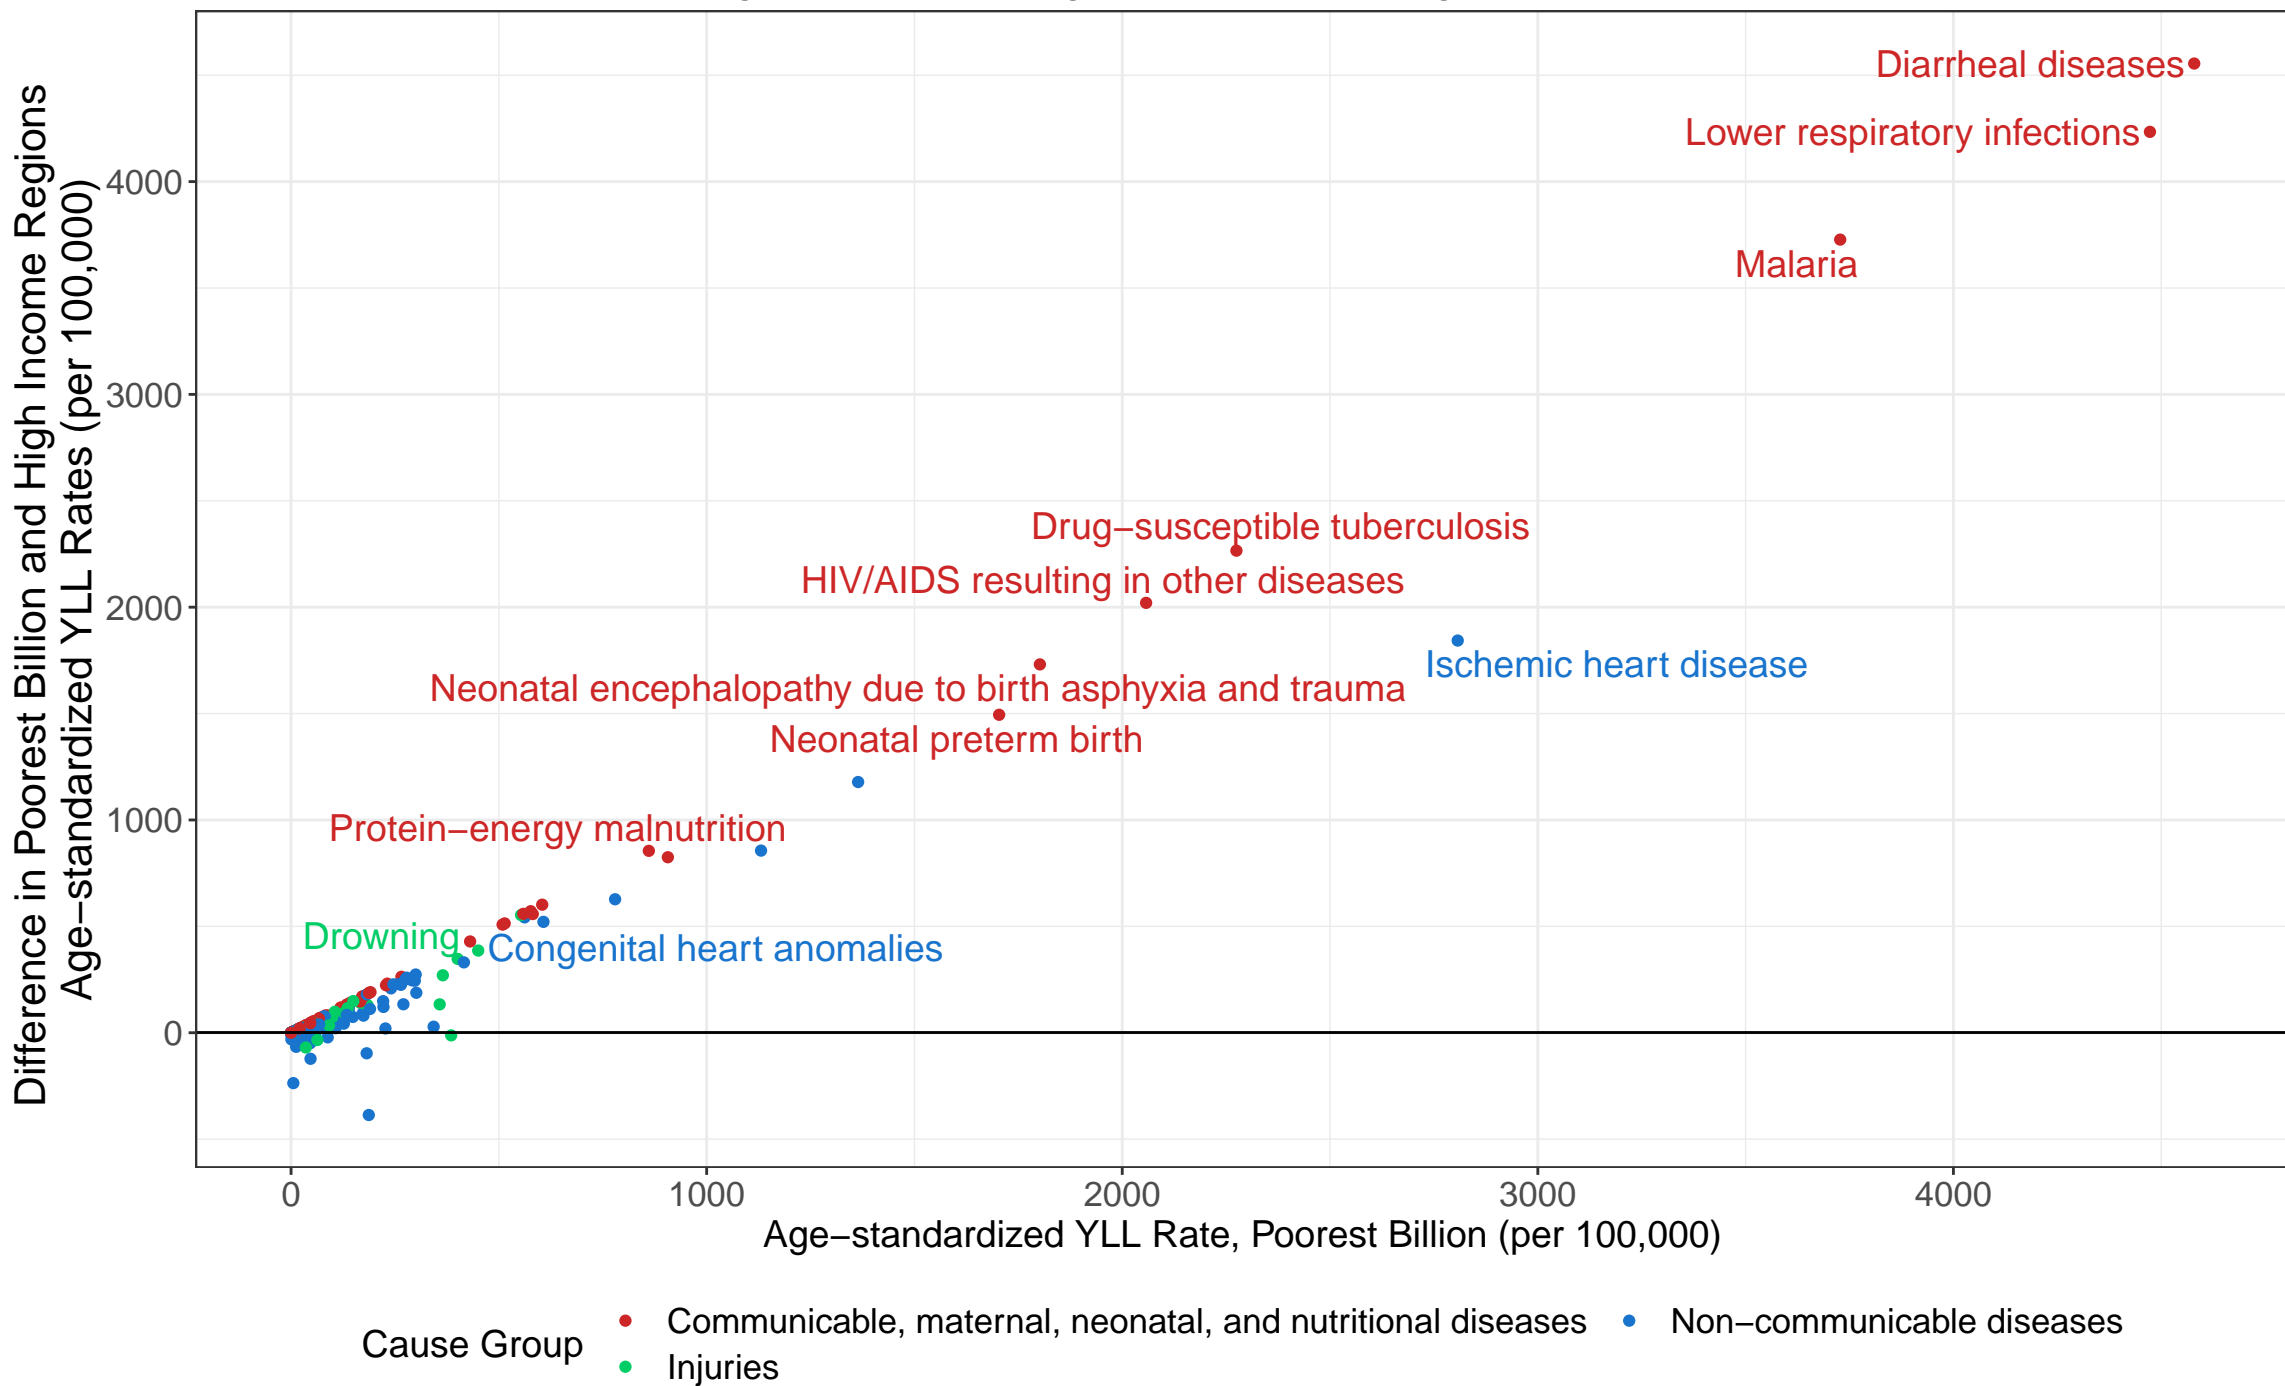

Appendix Figure 9e. Difference between Crude YLL Rates in Poorest Billion and High-income Regions, Poorest Billion Aggregation

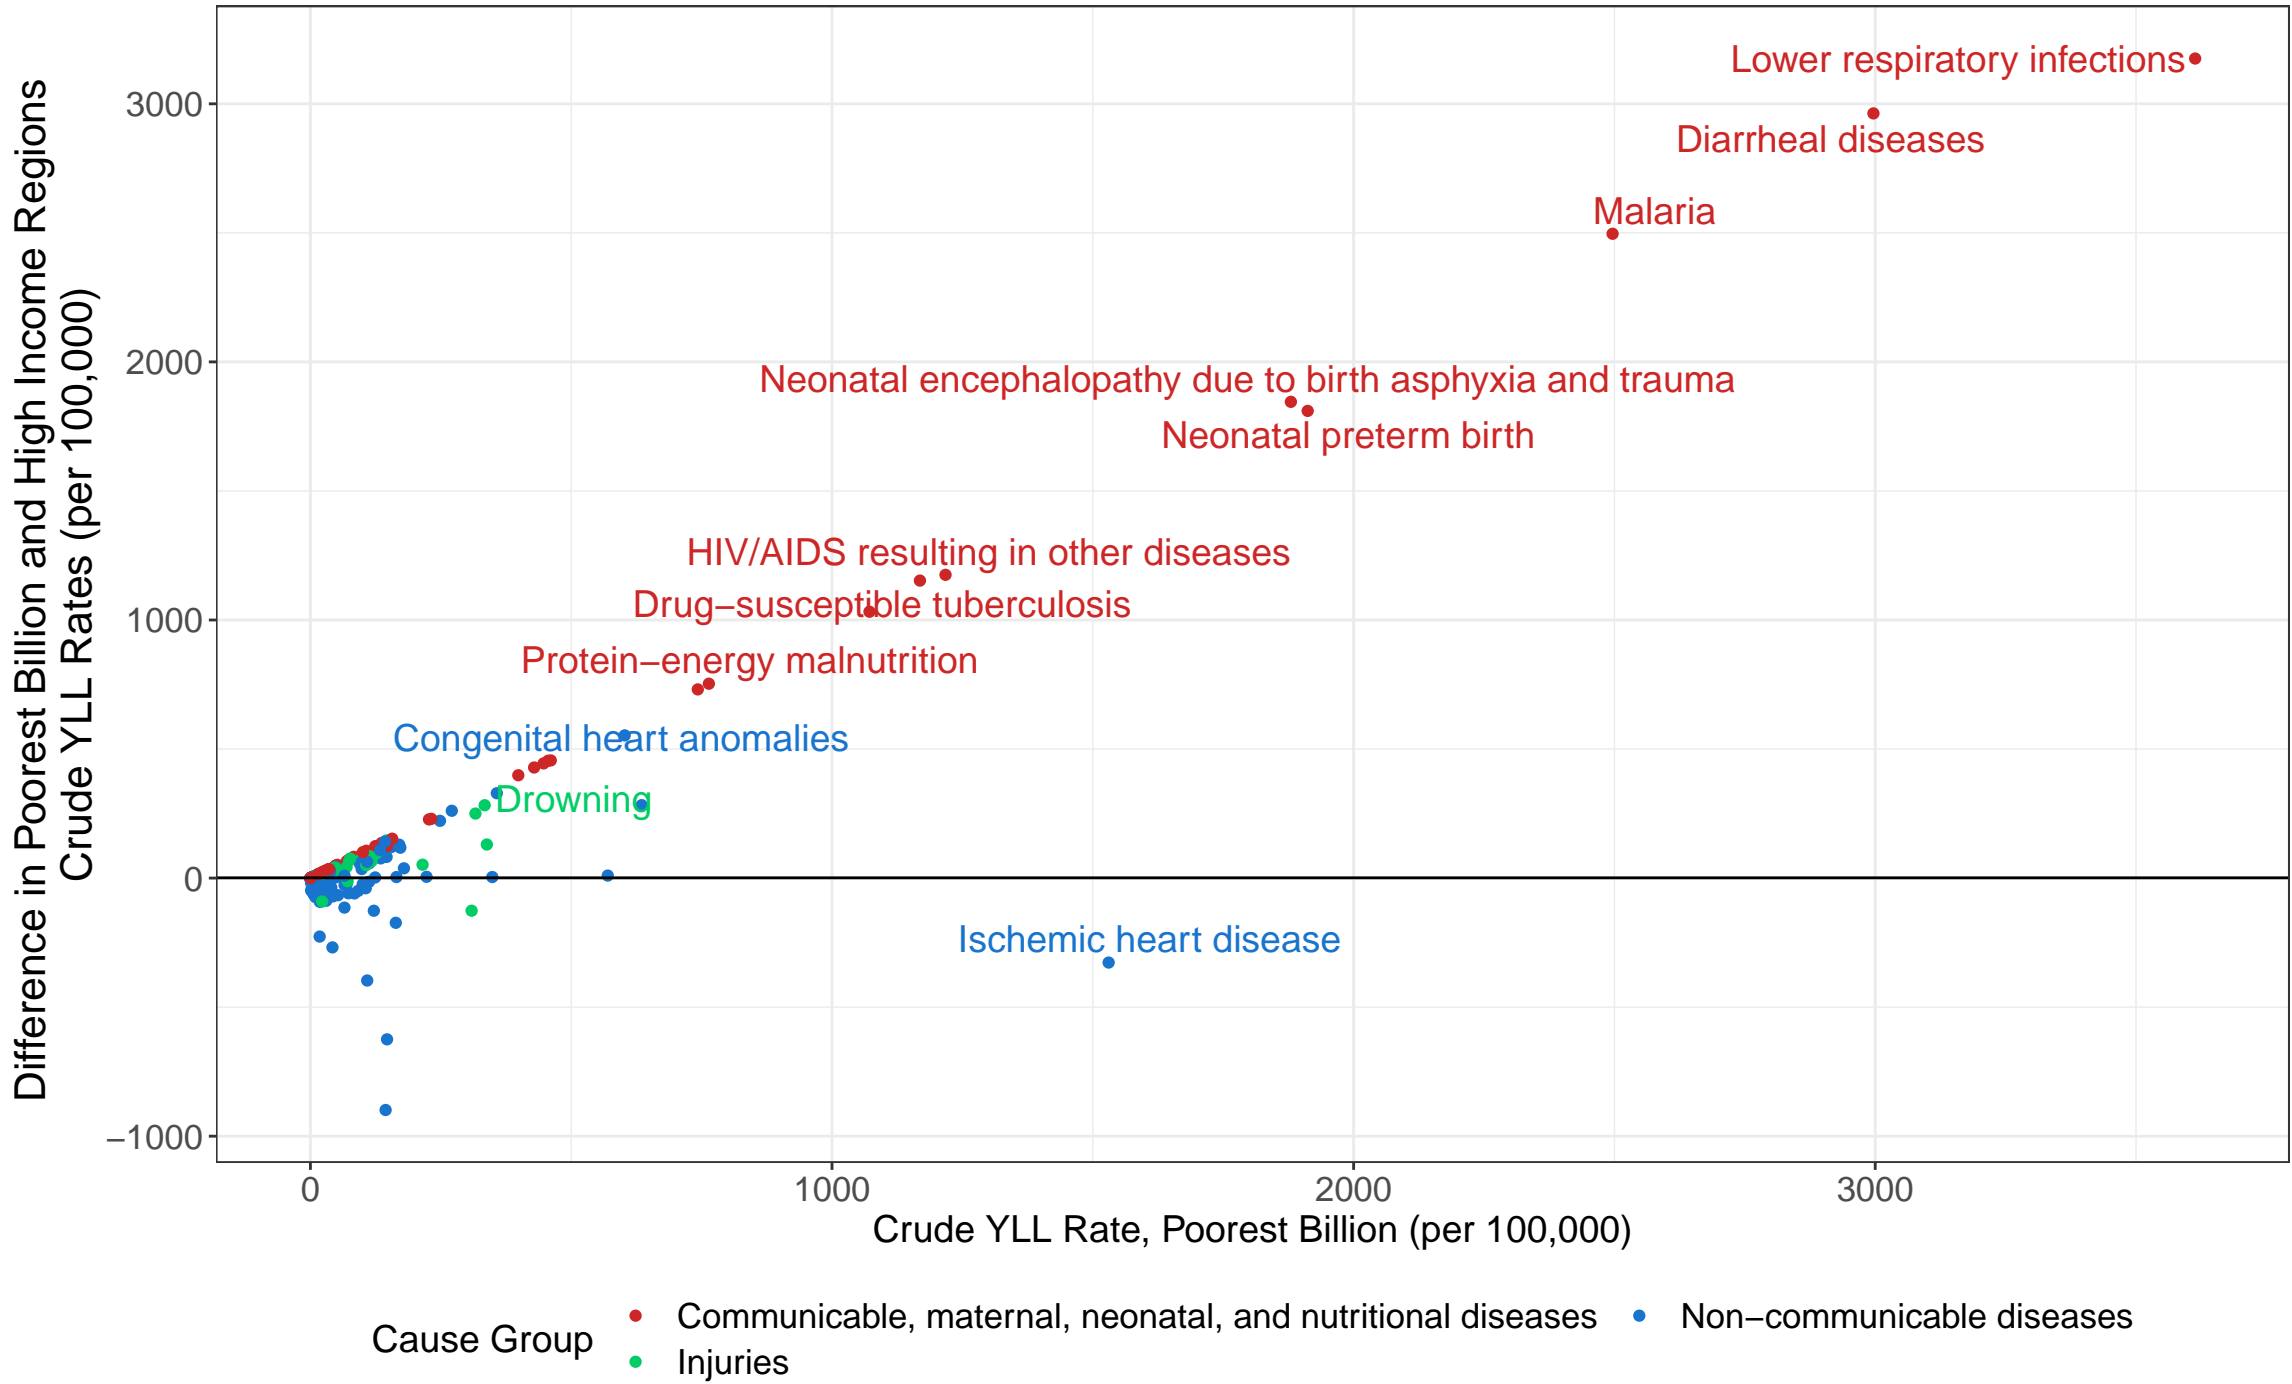

Appendix Figure 9f. Difference between Age-standardized YLL Rates in Poorest Billion and High-income Regions, Poorest Billion Aggregation

Difference in Poorest Billion and High Income Regions Age-standardized YLL Rates (per 100,000)

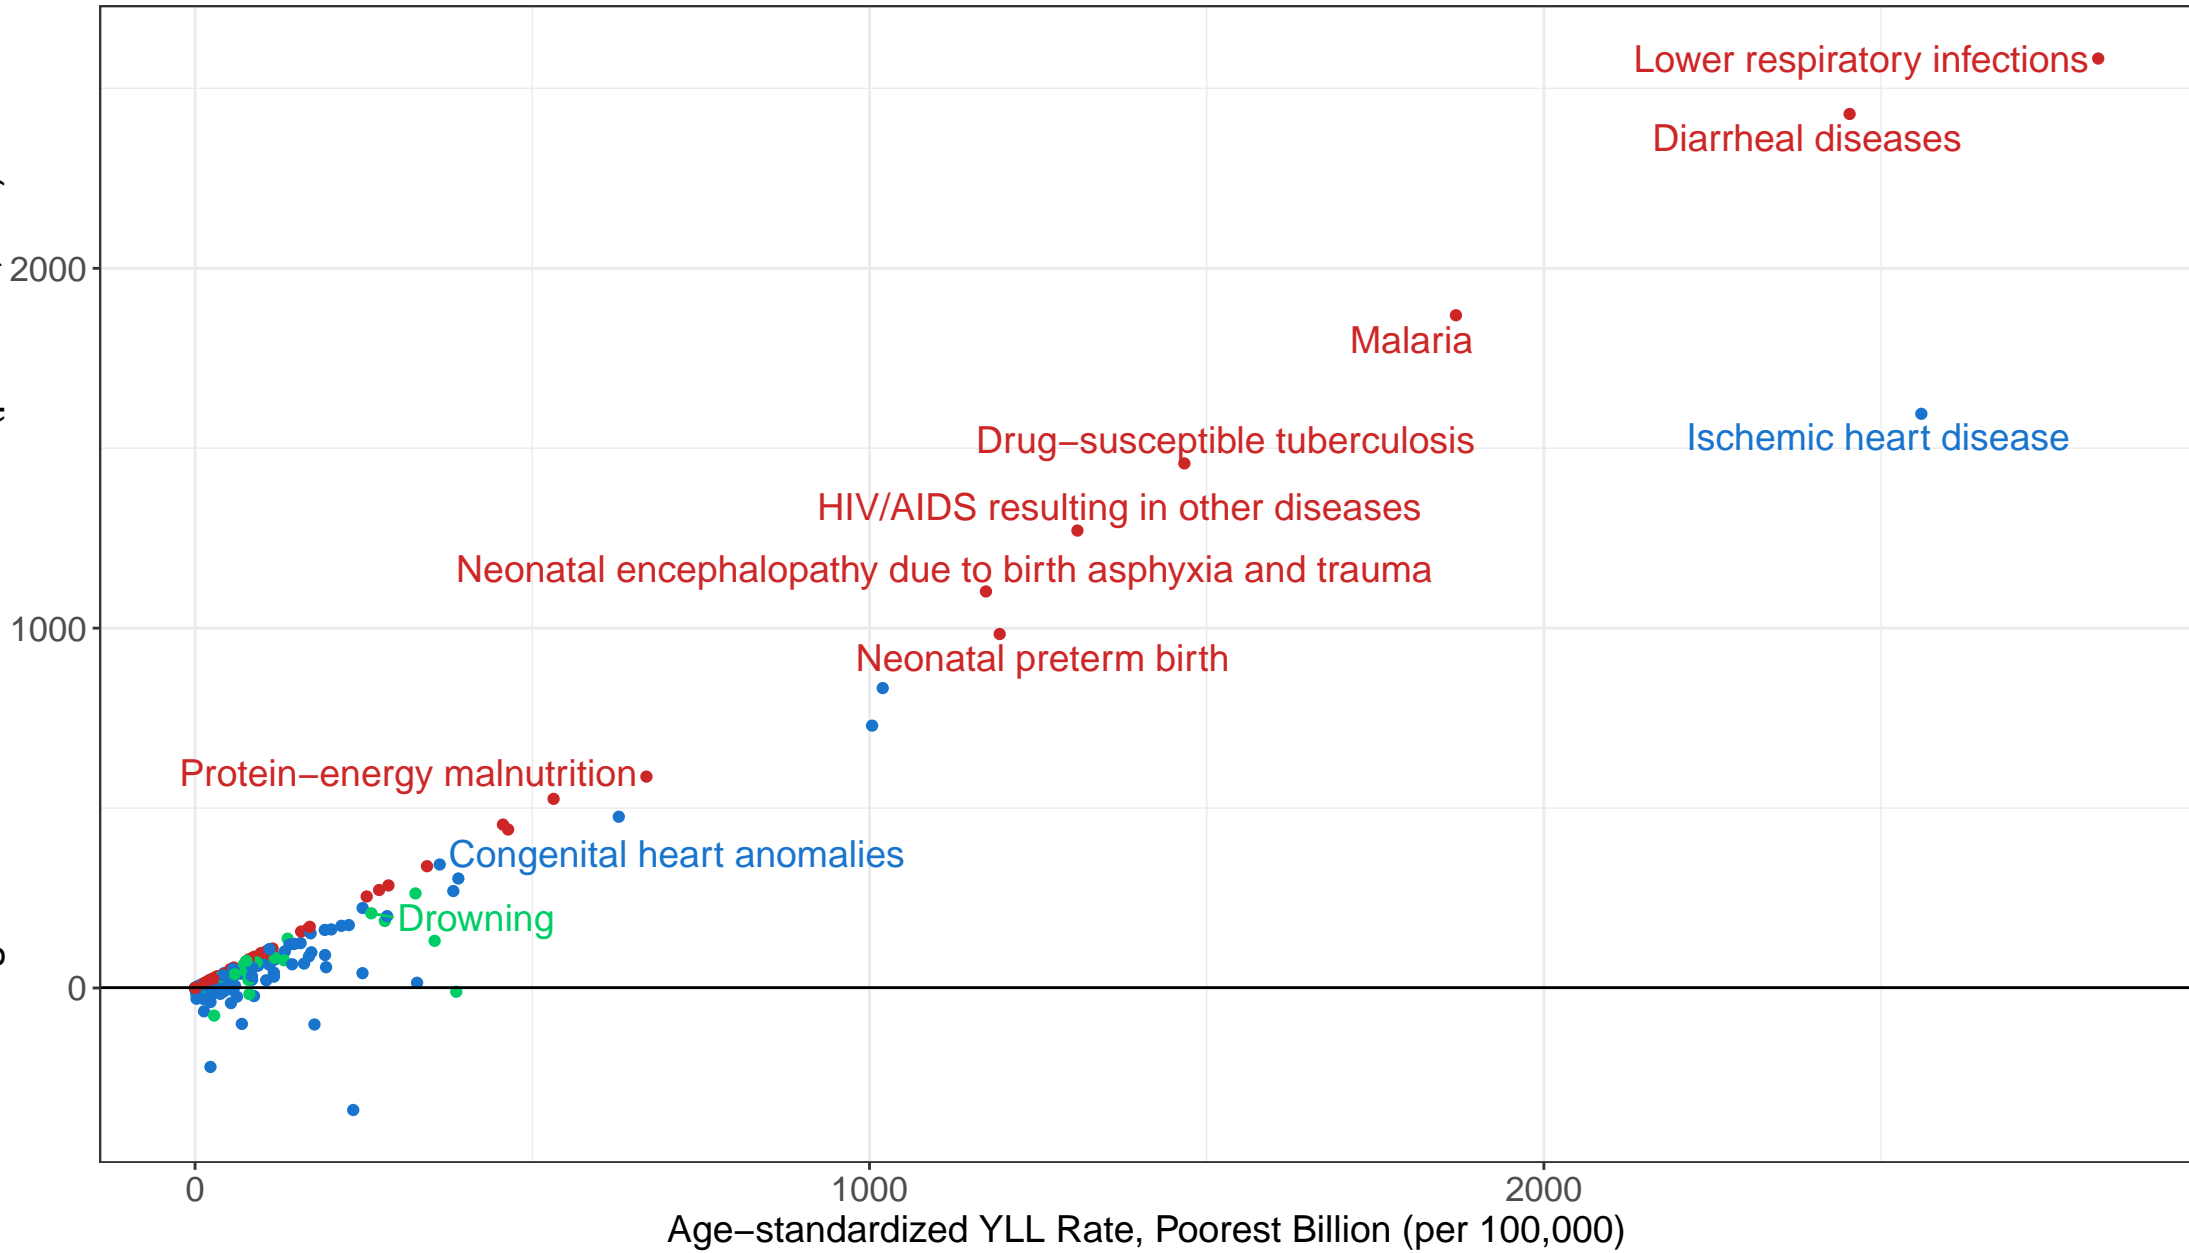

Cause Group

- Communicable, maternal, neonatal, and nutritional diseases
- Non-communicable diseases
- Injuries

Appendix Figure 9g. Difference between Crude YLL Rates in Poorest Billion and High-income Regions, Country Aggregation

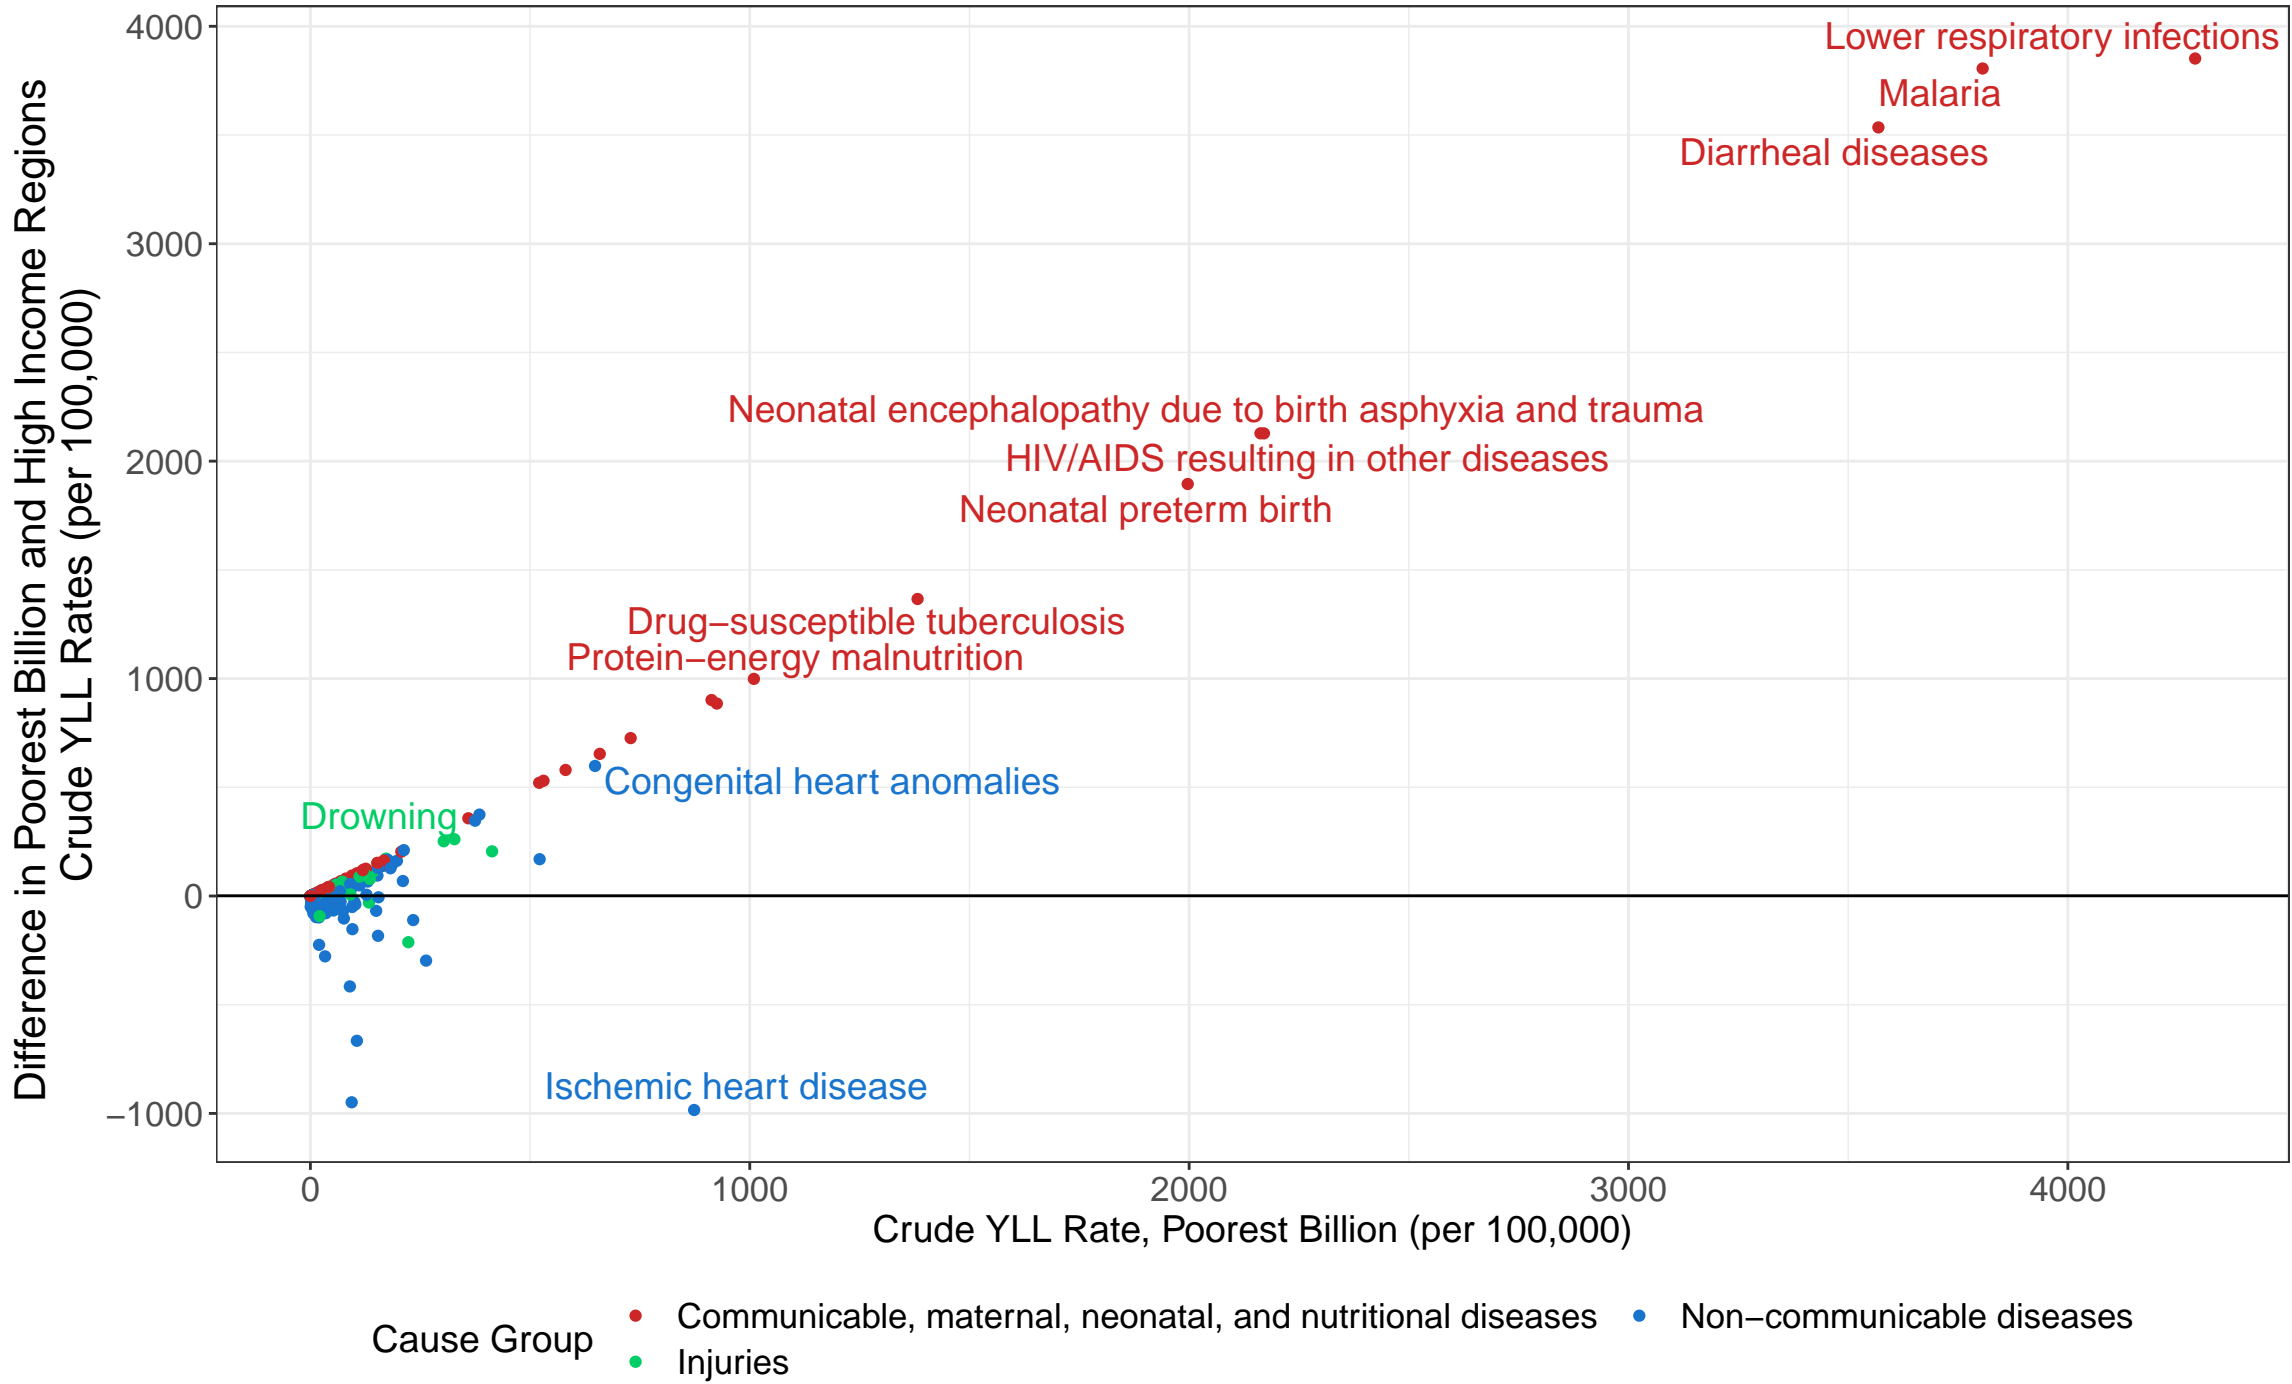

Appendix Figure 9h. Difference between Age-standardized YLL Rates in Poorest Billion and High-income Regions, Country Aggregation

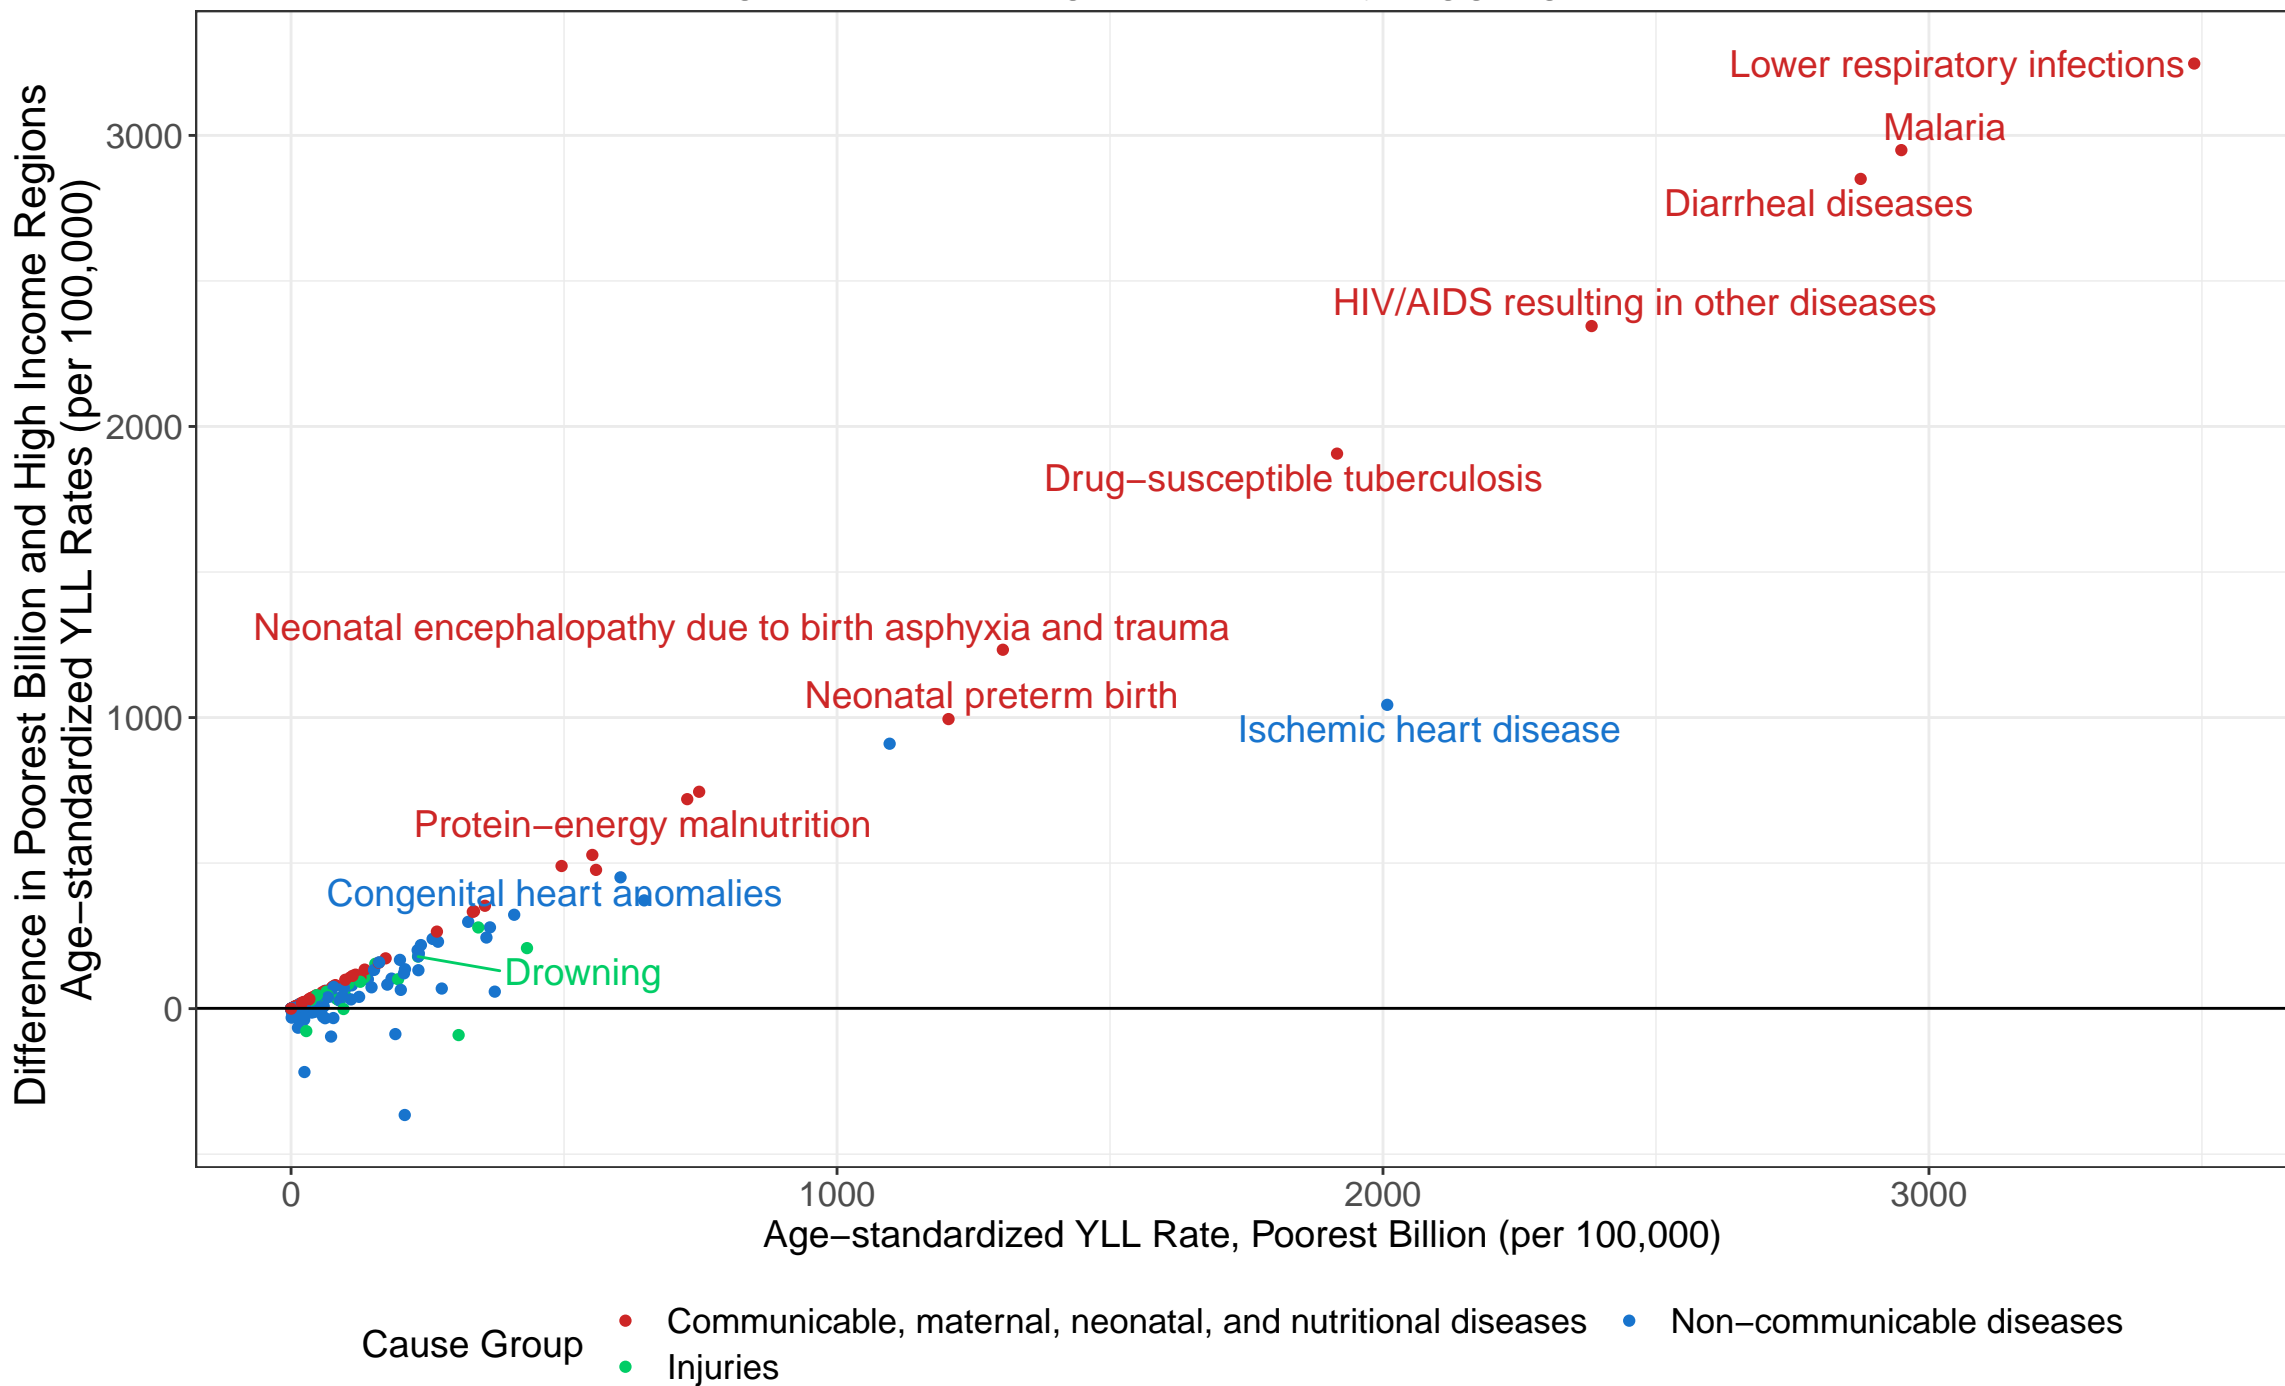

Appendix Figure 9i. Difference between Crude YLL Rates in Low-income and High-income Regions

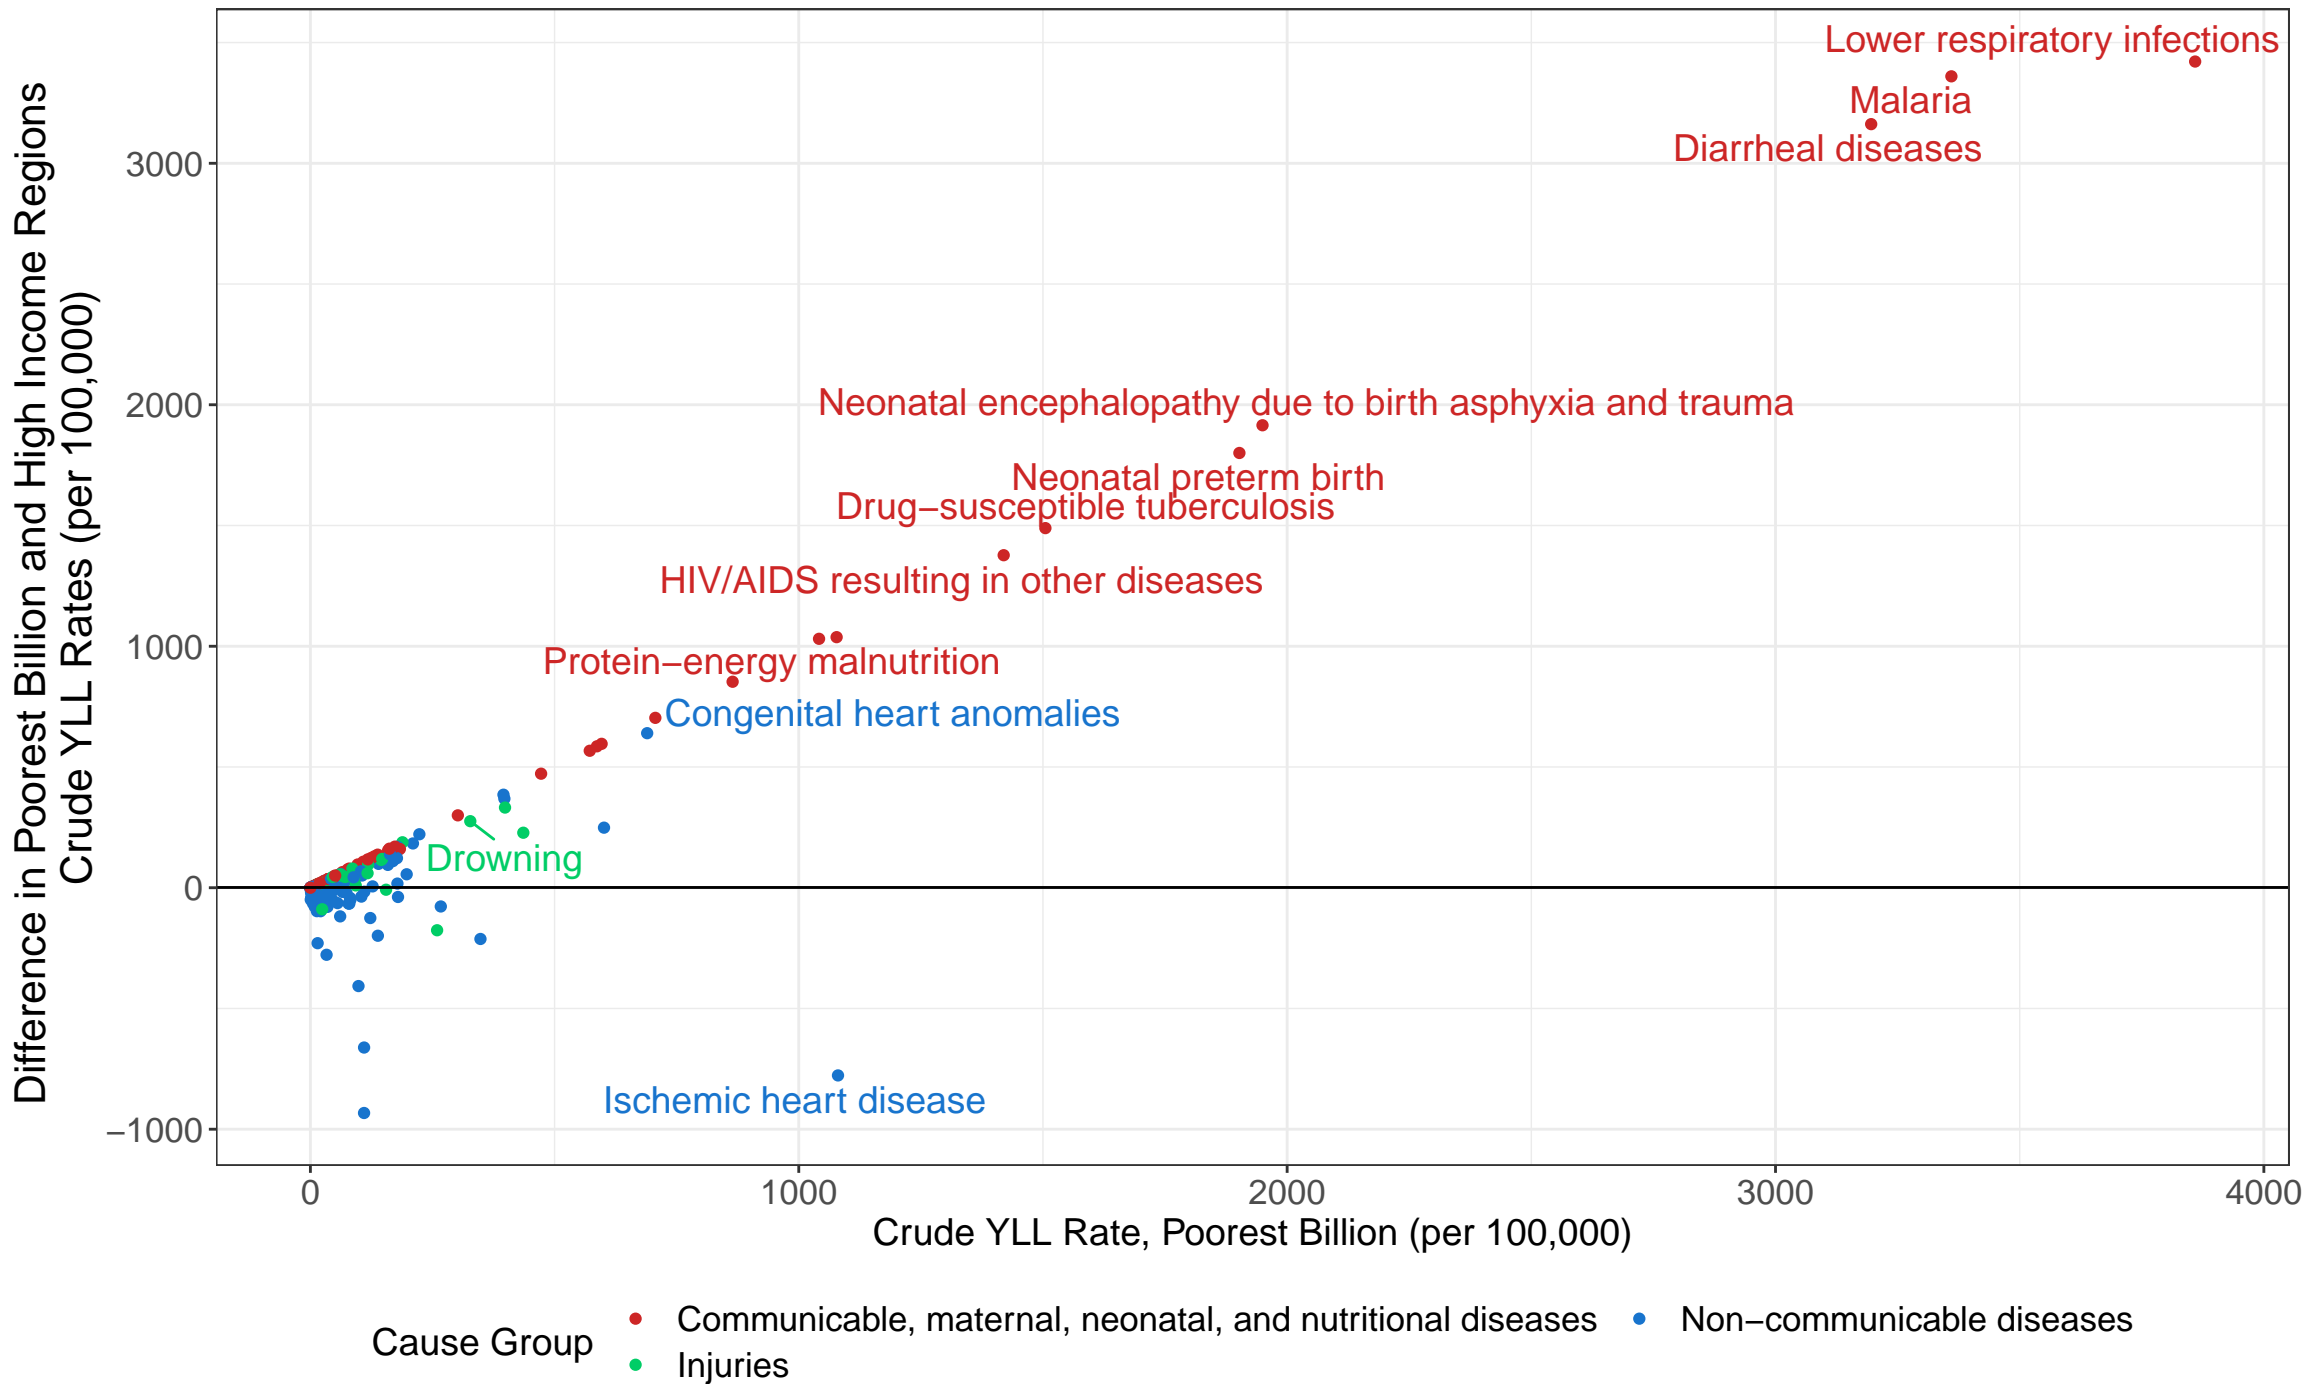

Appendix Figure 9j. Difference between Age-standardized YLL Rates in Low-income and High-income Regions

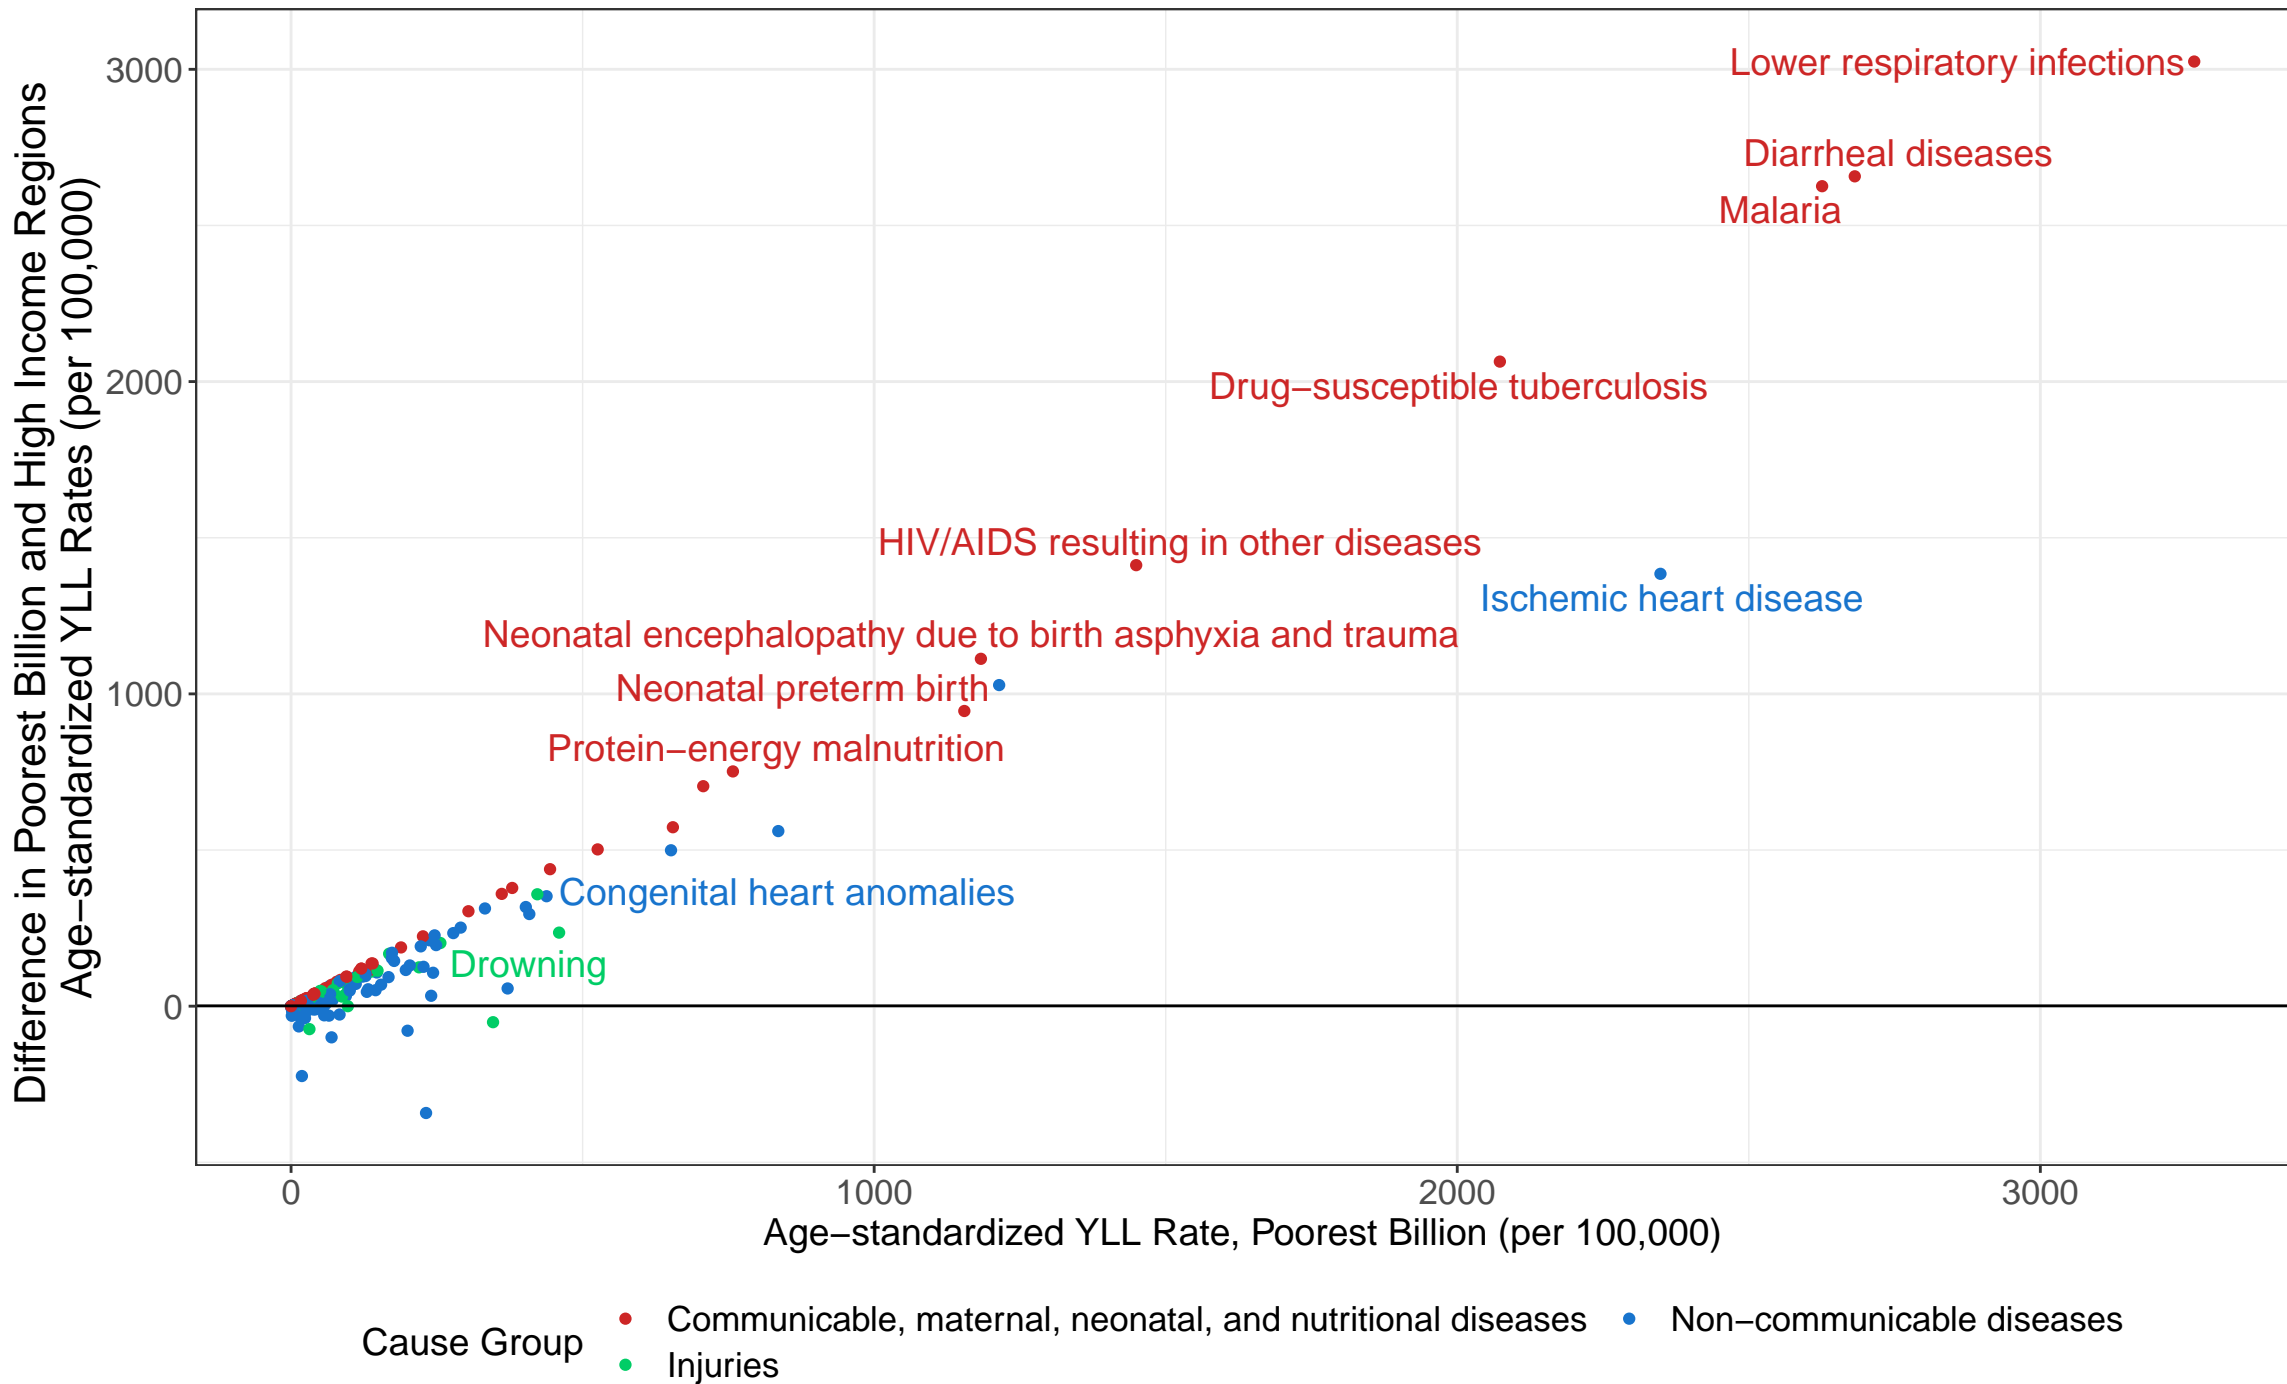



Appendix Figure 10a. Difference between Crude YLD Rates in Poorest Billion and High-income Regions, Selective Ecological Approach

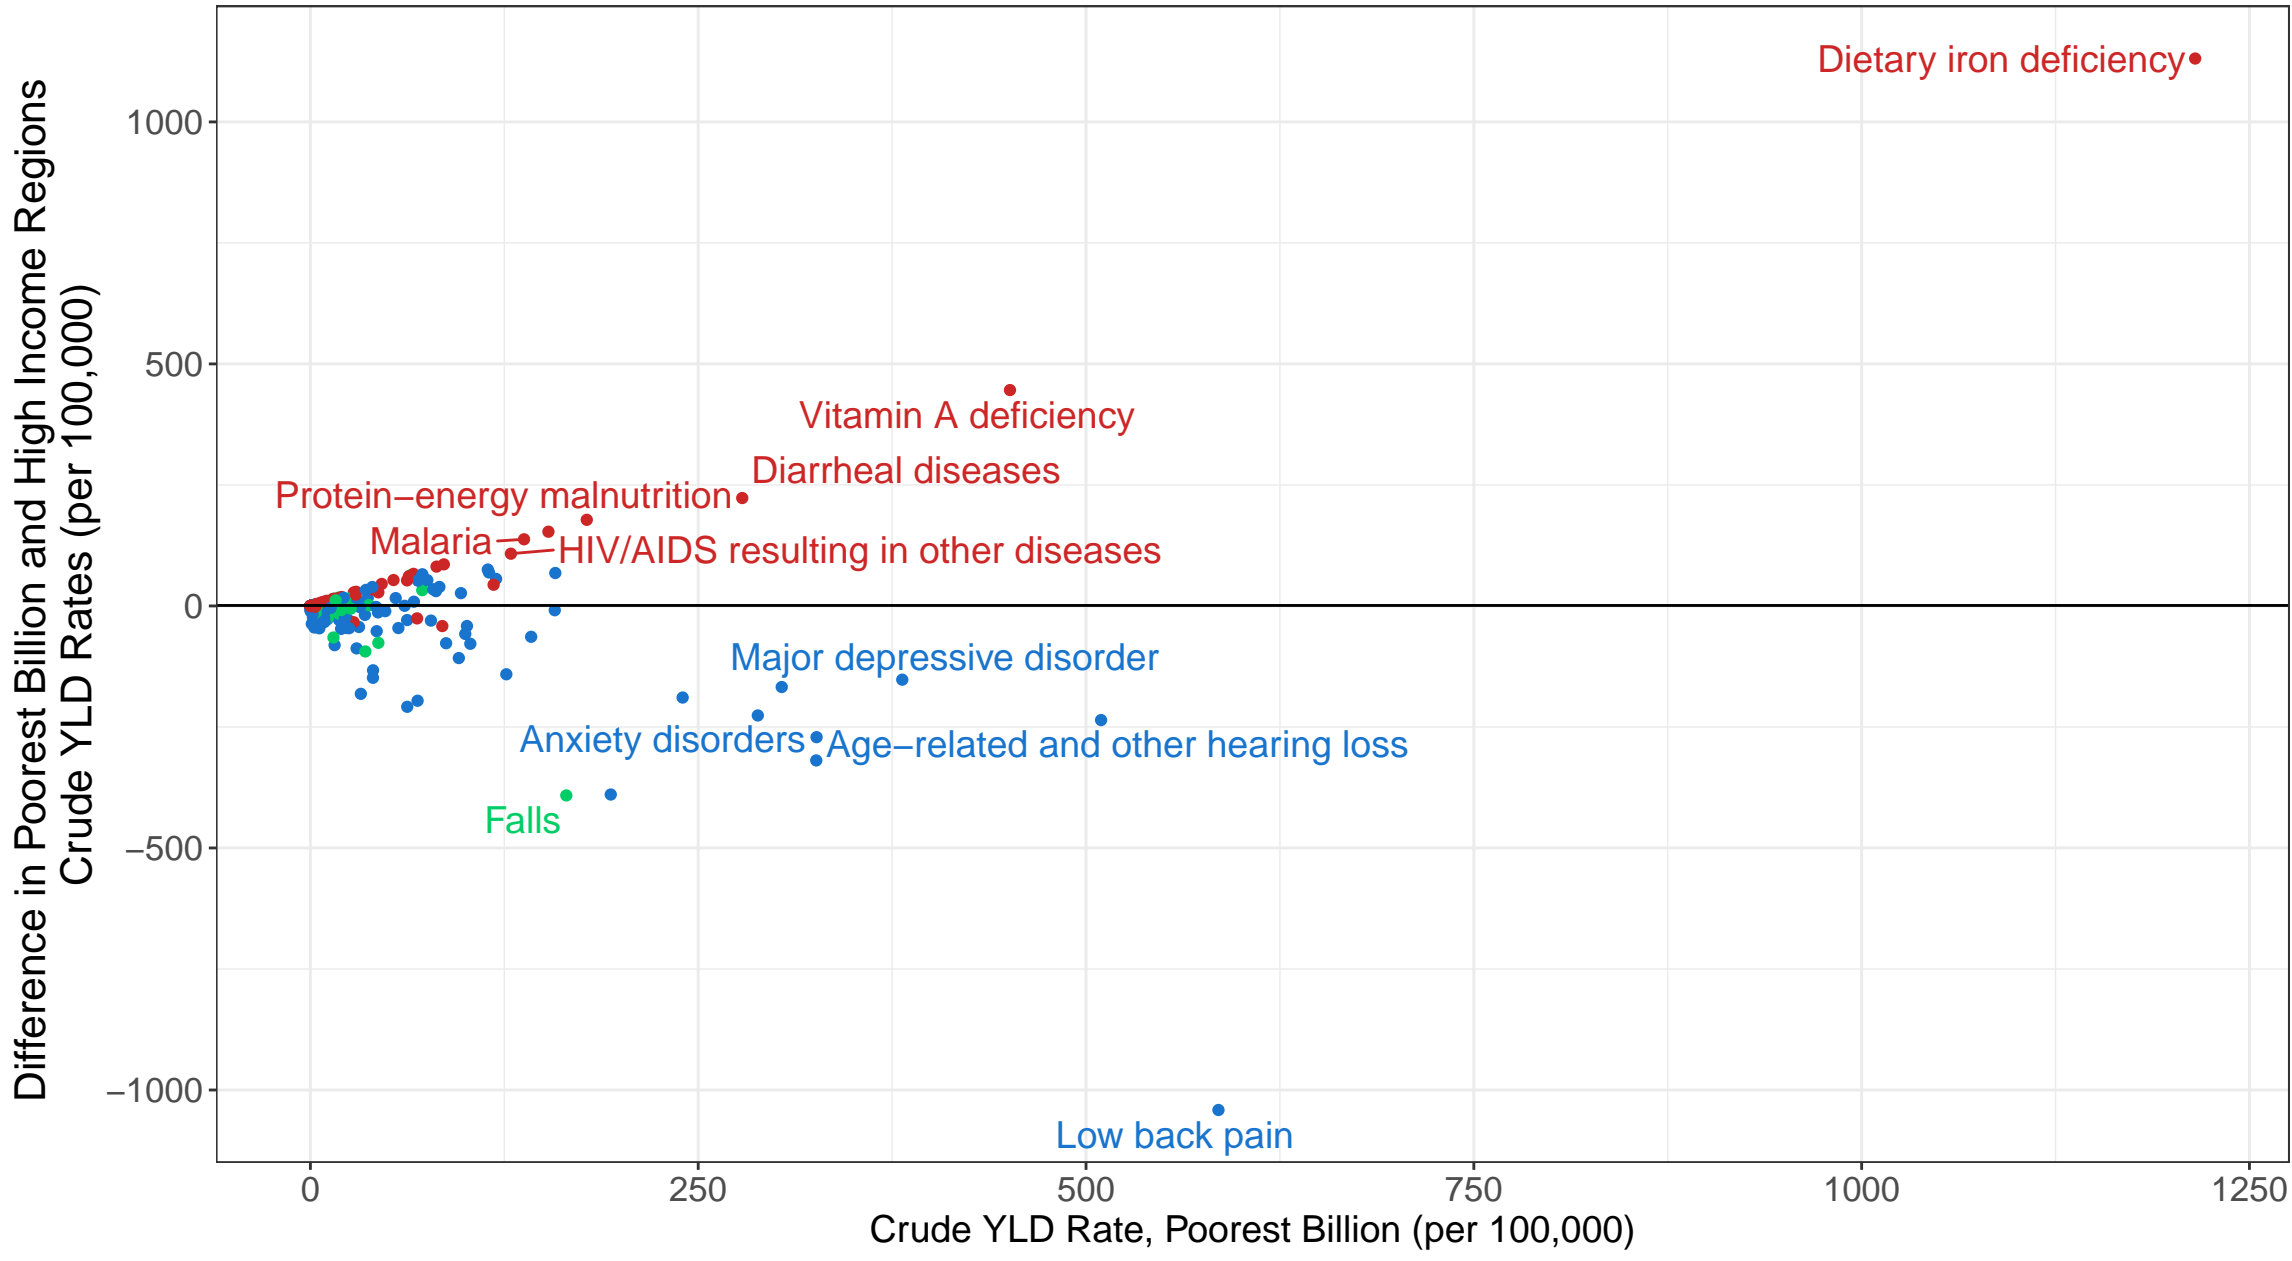

Cause Group

- Communicable, maternal, neonatal, and nutritional diseases
- Non-communicable diseases
- Injuries

Appendix Figure 10b. Difference between Age-standardized YLD Rates in Poorest Billion and High-income Regions, Selective Ecological Approach

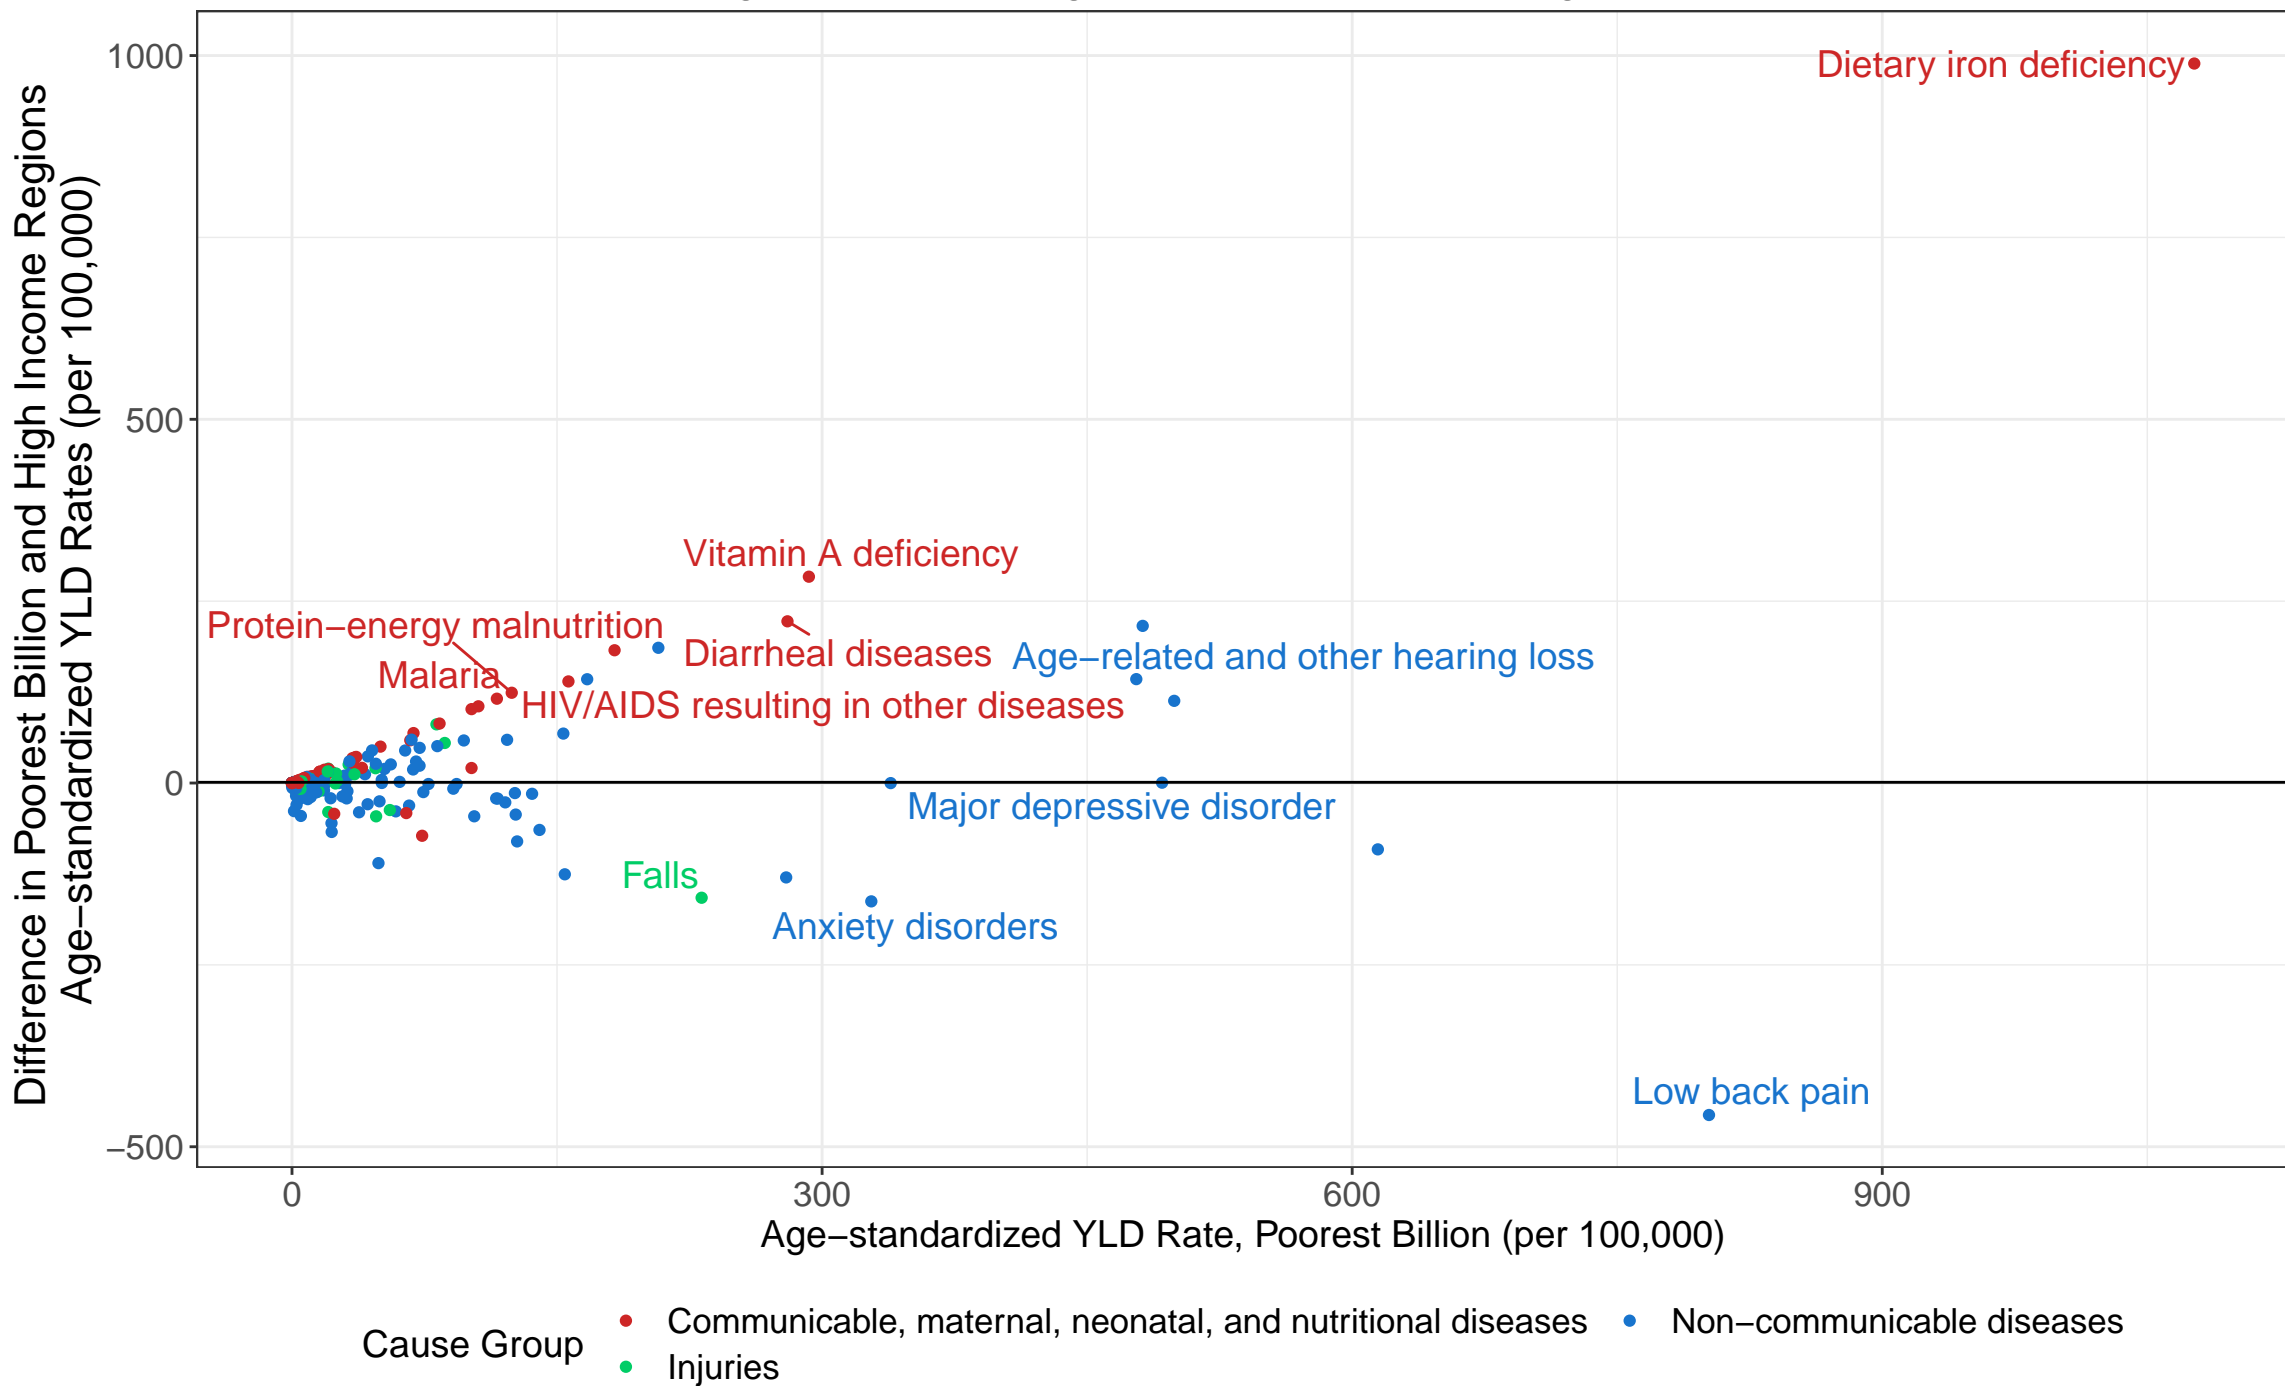

Appendix Figure 10c. Difference between Crude YLD Rates in Poorest Billion and High-income Regions, Full Ecological Approach

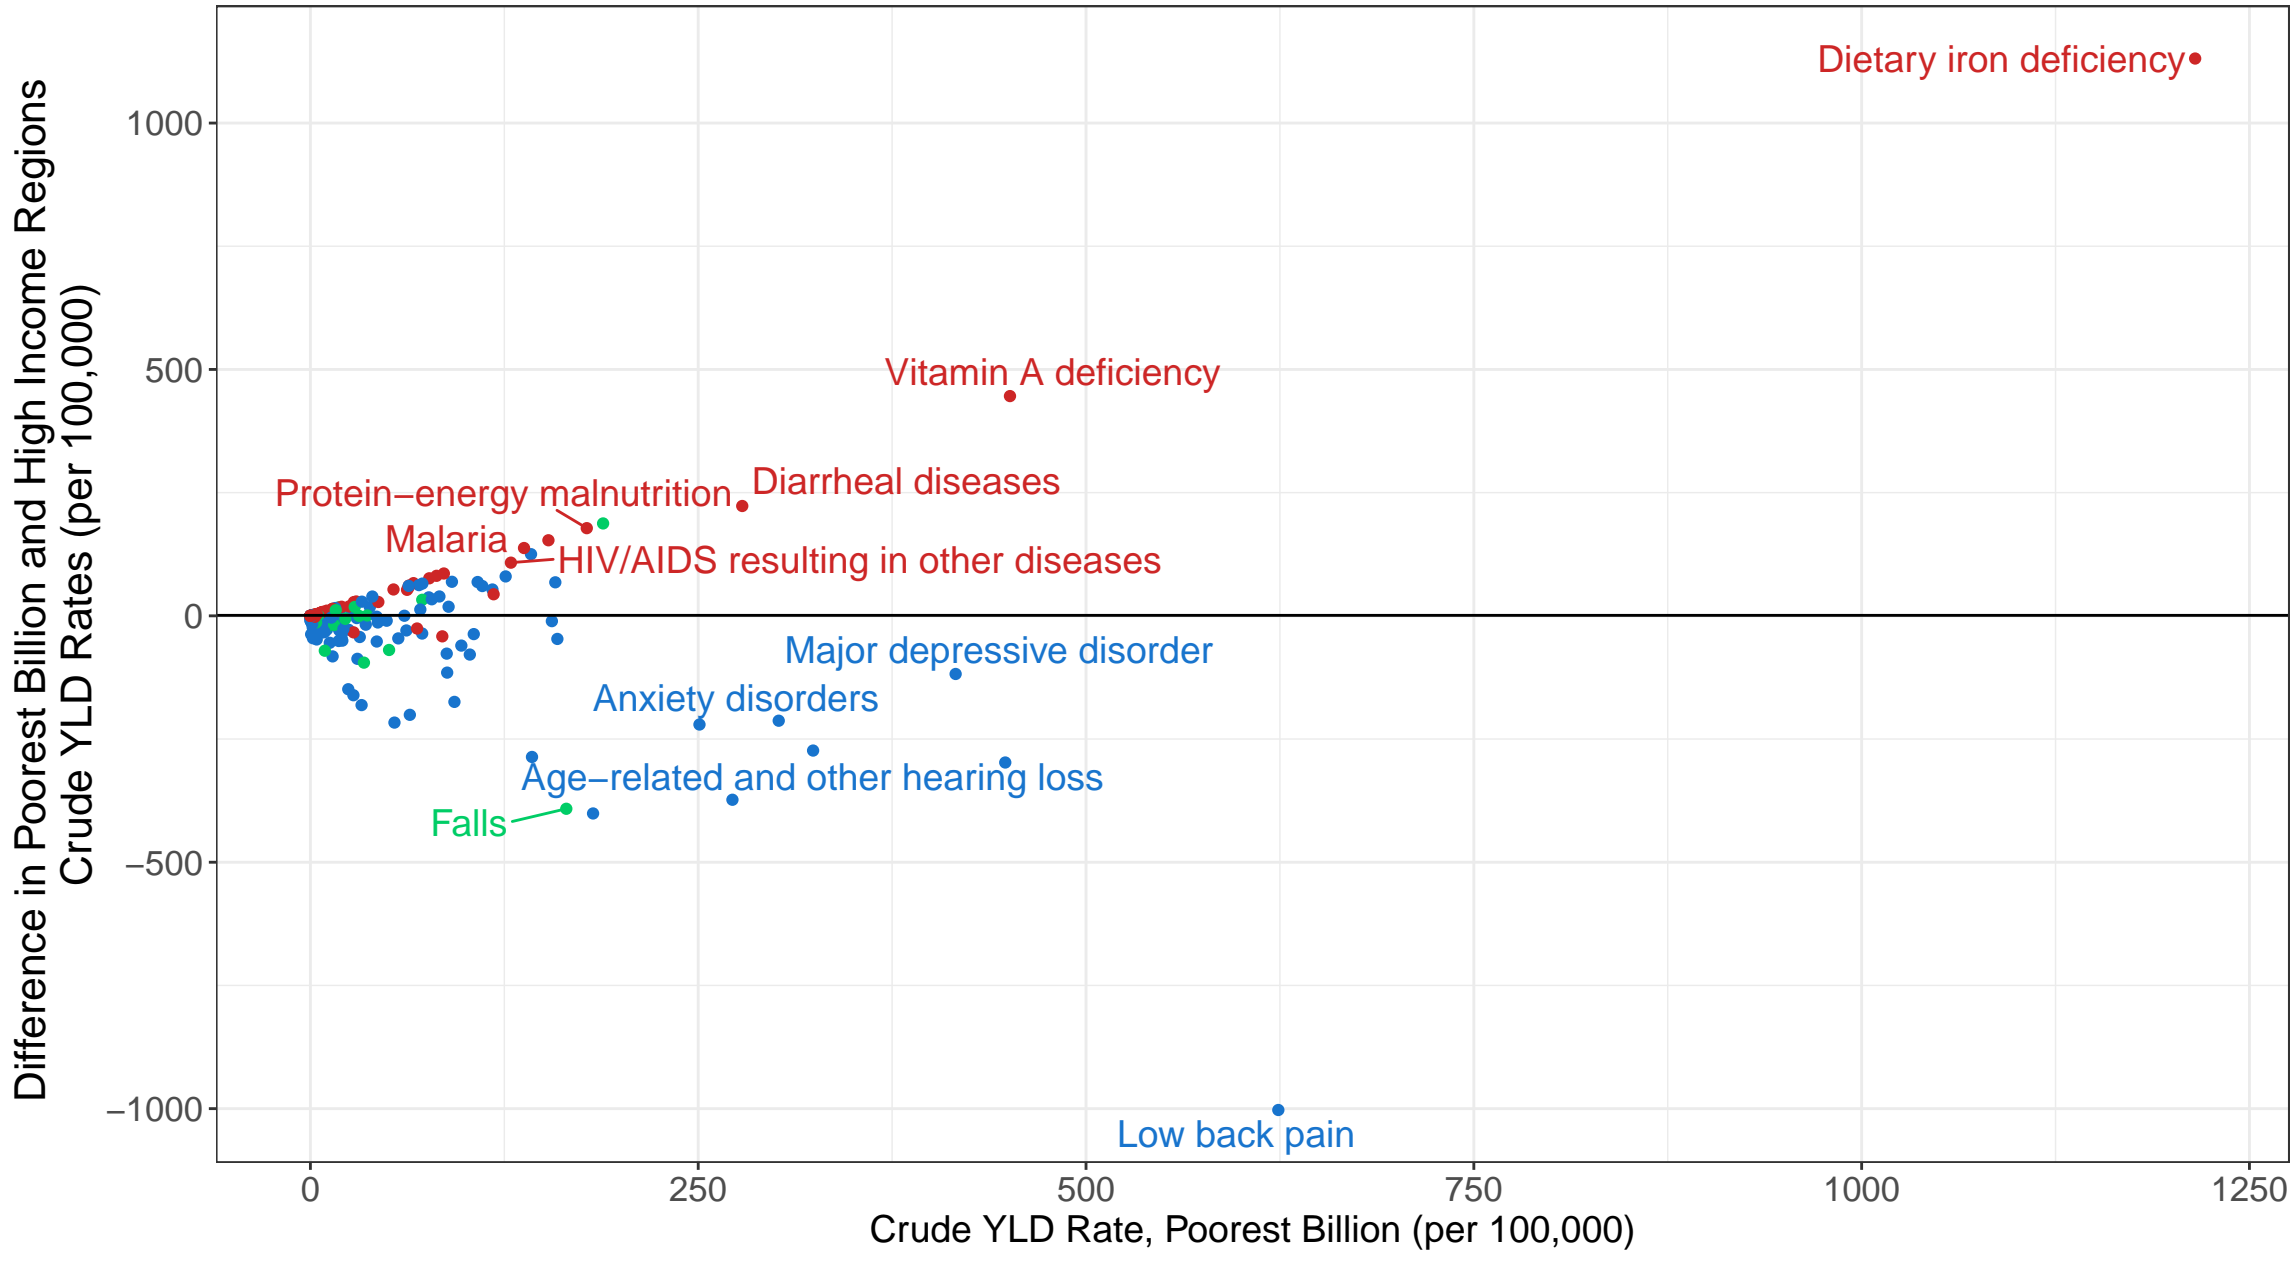

Cause Group

- Communicable, maternal, neonatal, and nutritional diseases
- Non-communicable diseases
- Injuries

Appendix Figure 10d. Difference between Age-standardized YLD Rates in Poorest Billion and High-income Regions, Full Ecological Approach

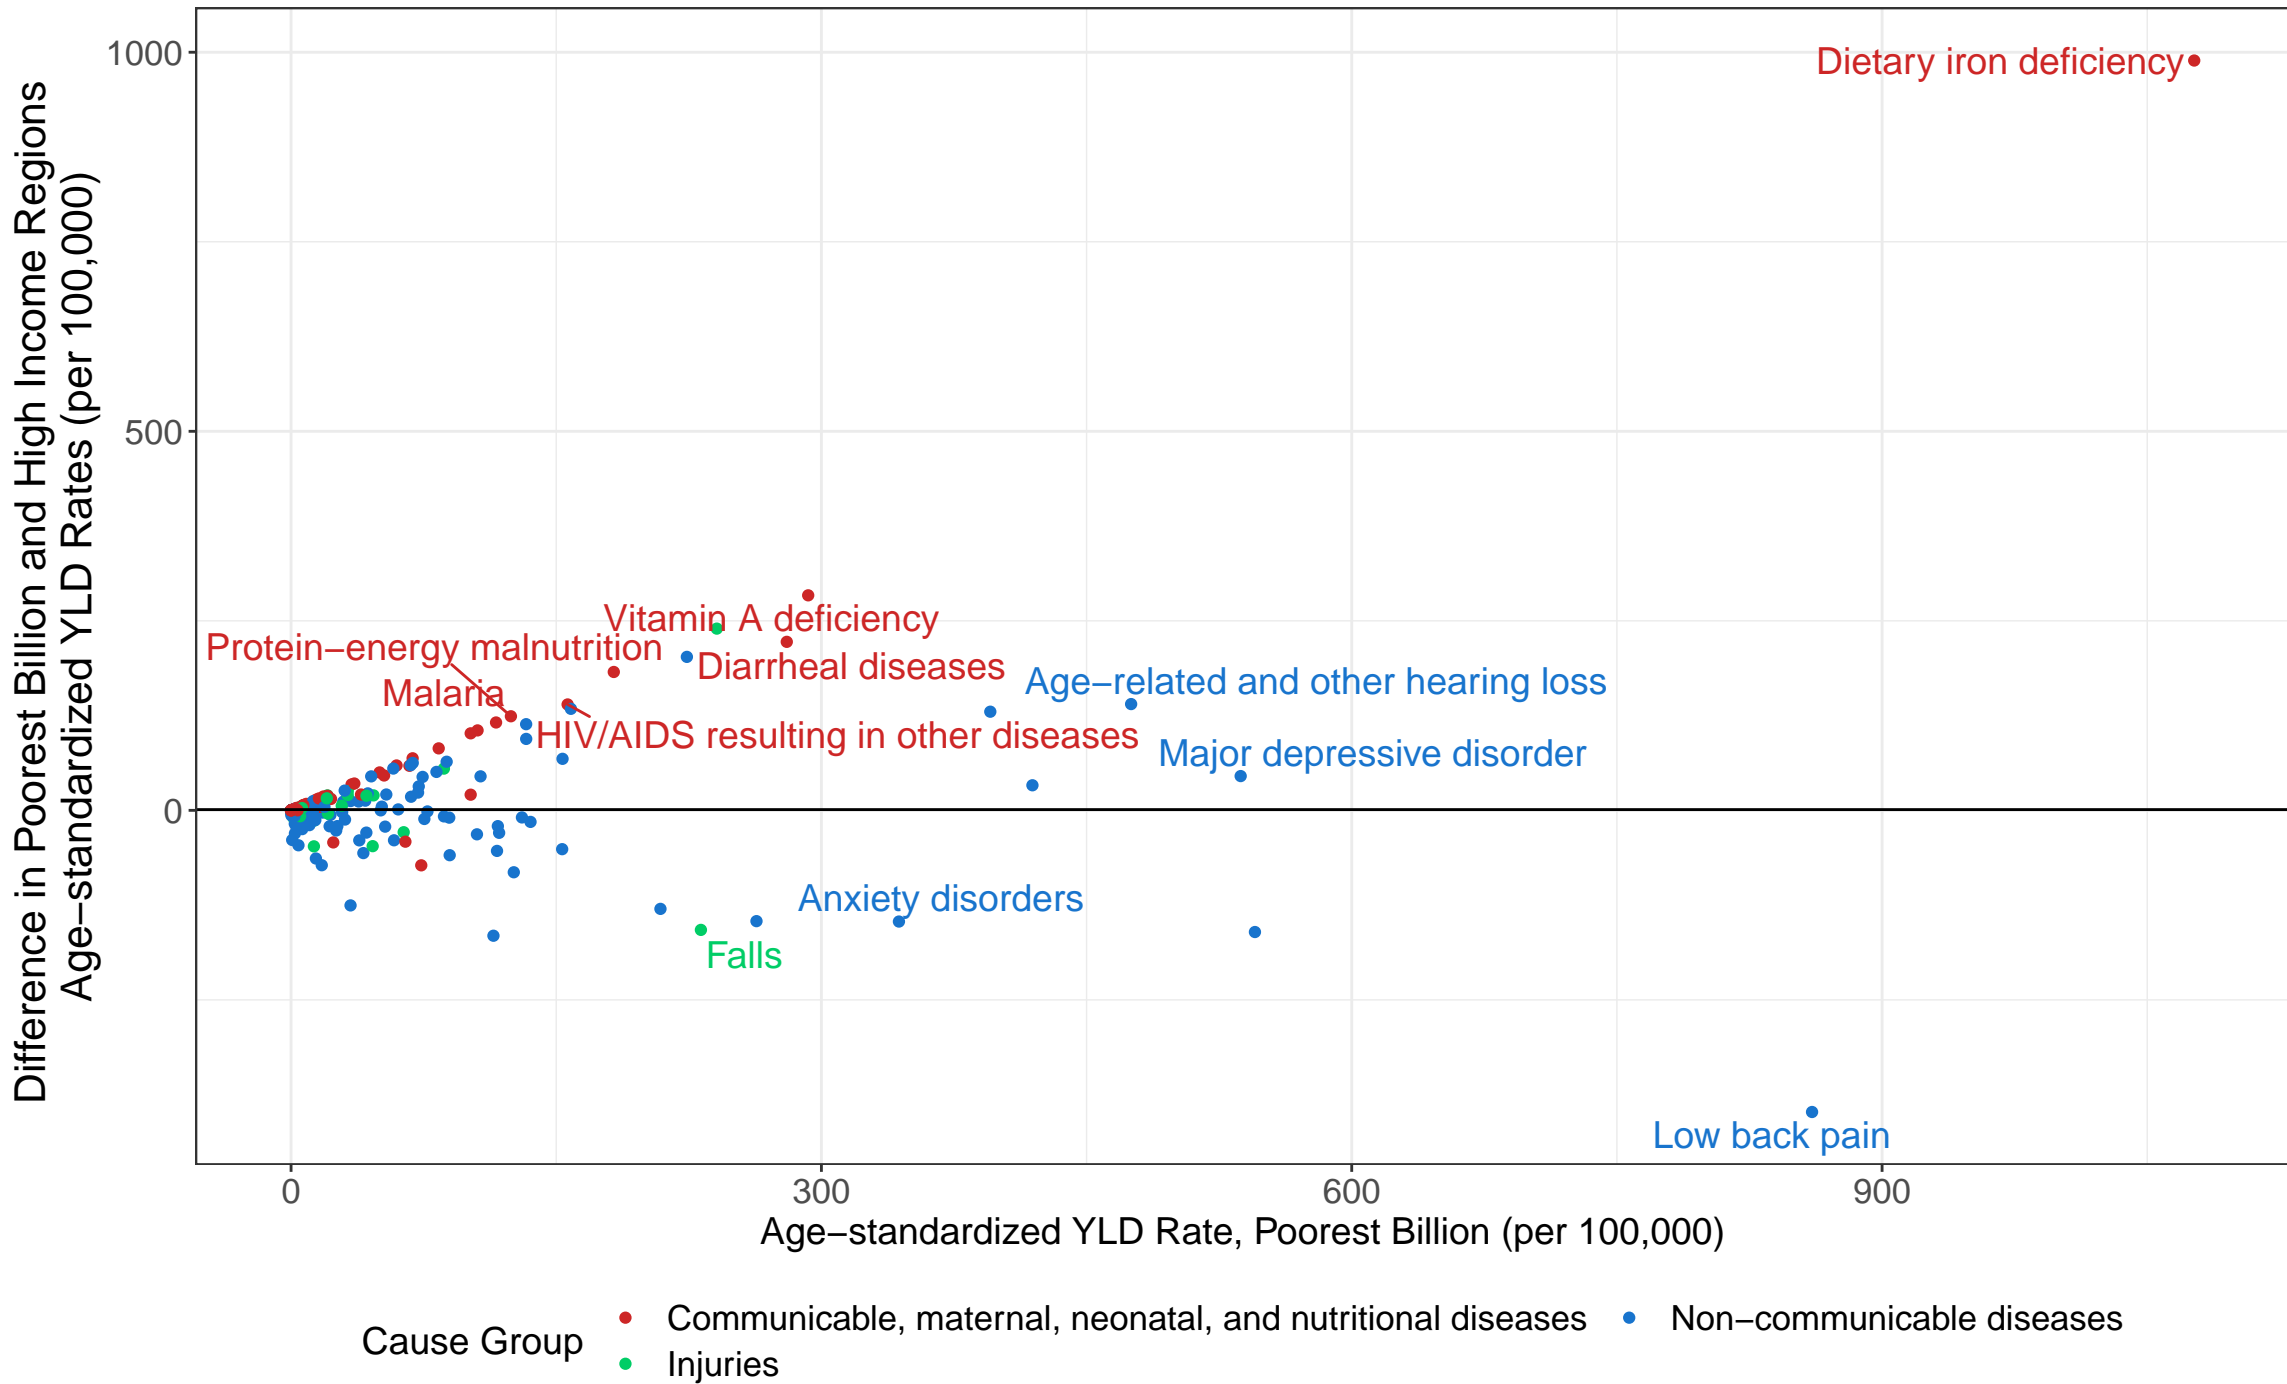

Appendix Figure 10e. Difference between Crude YLD Rates in Poorest Billion and High-income Regions, Poorest Billion Aggregation

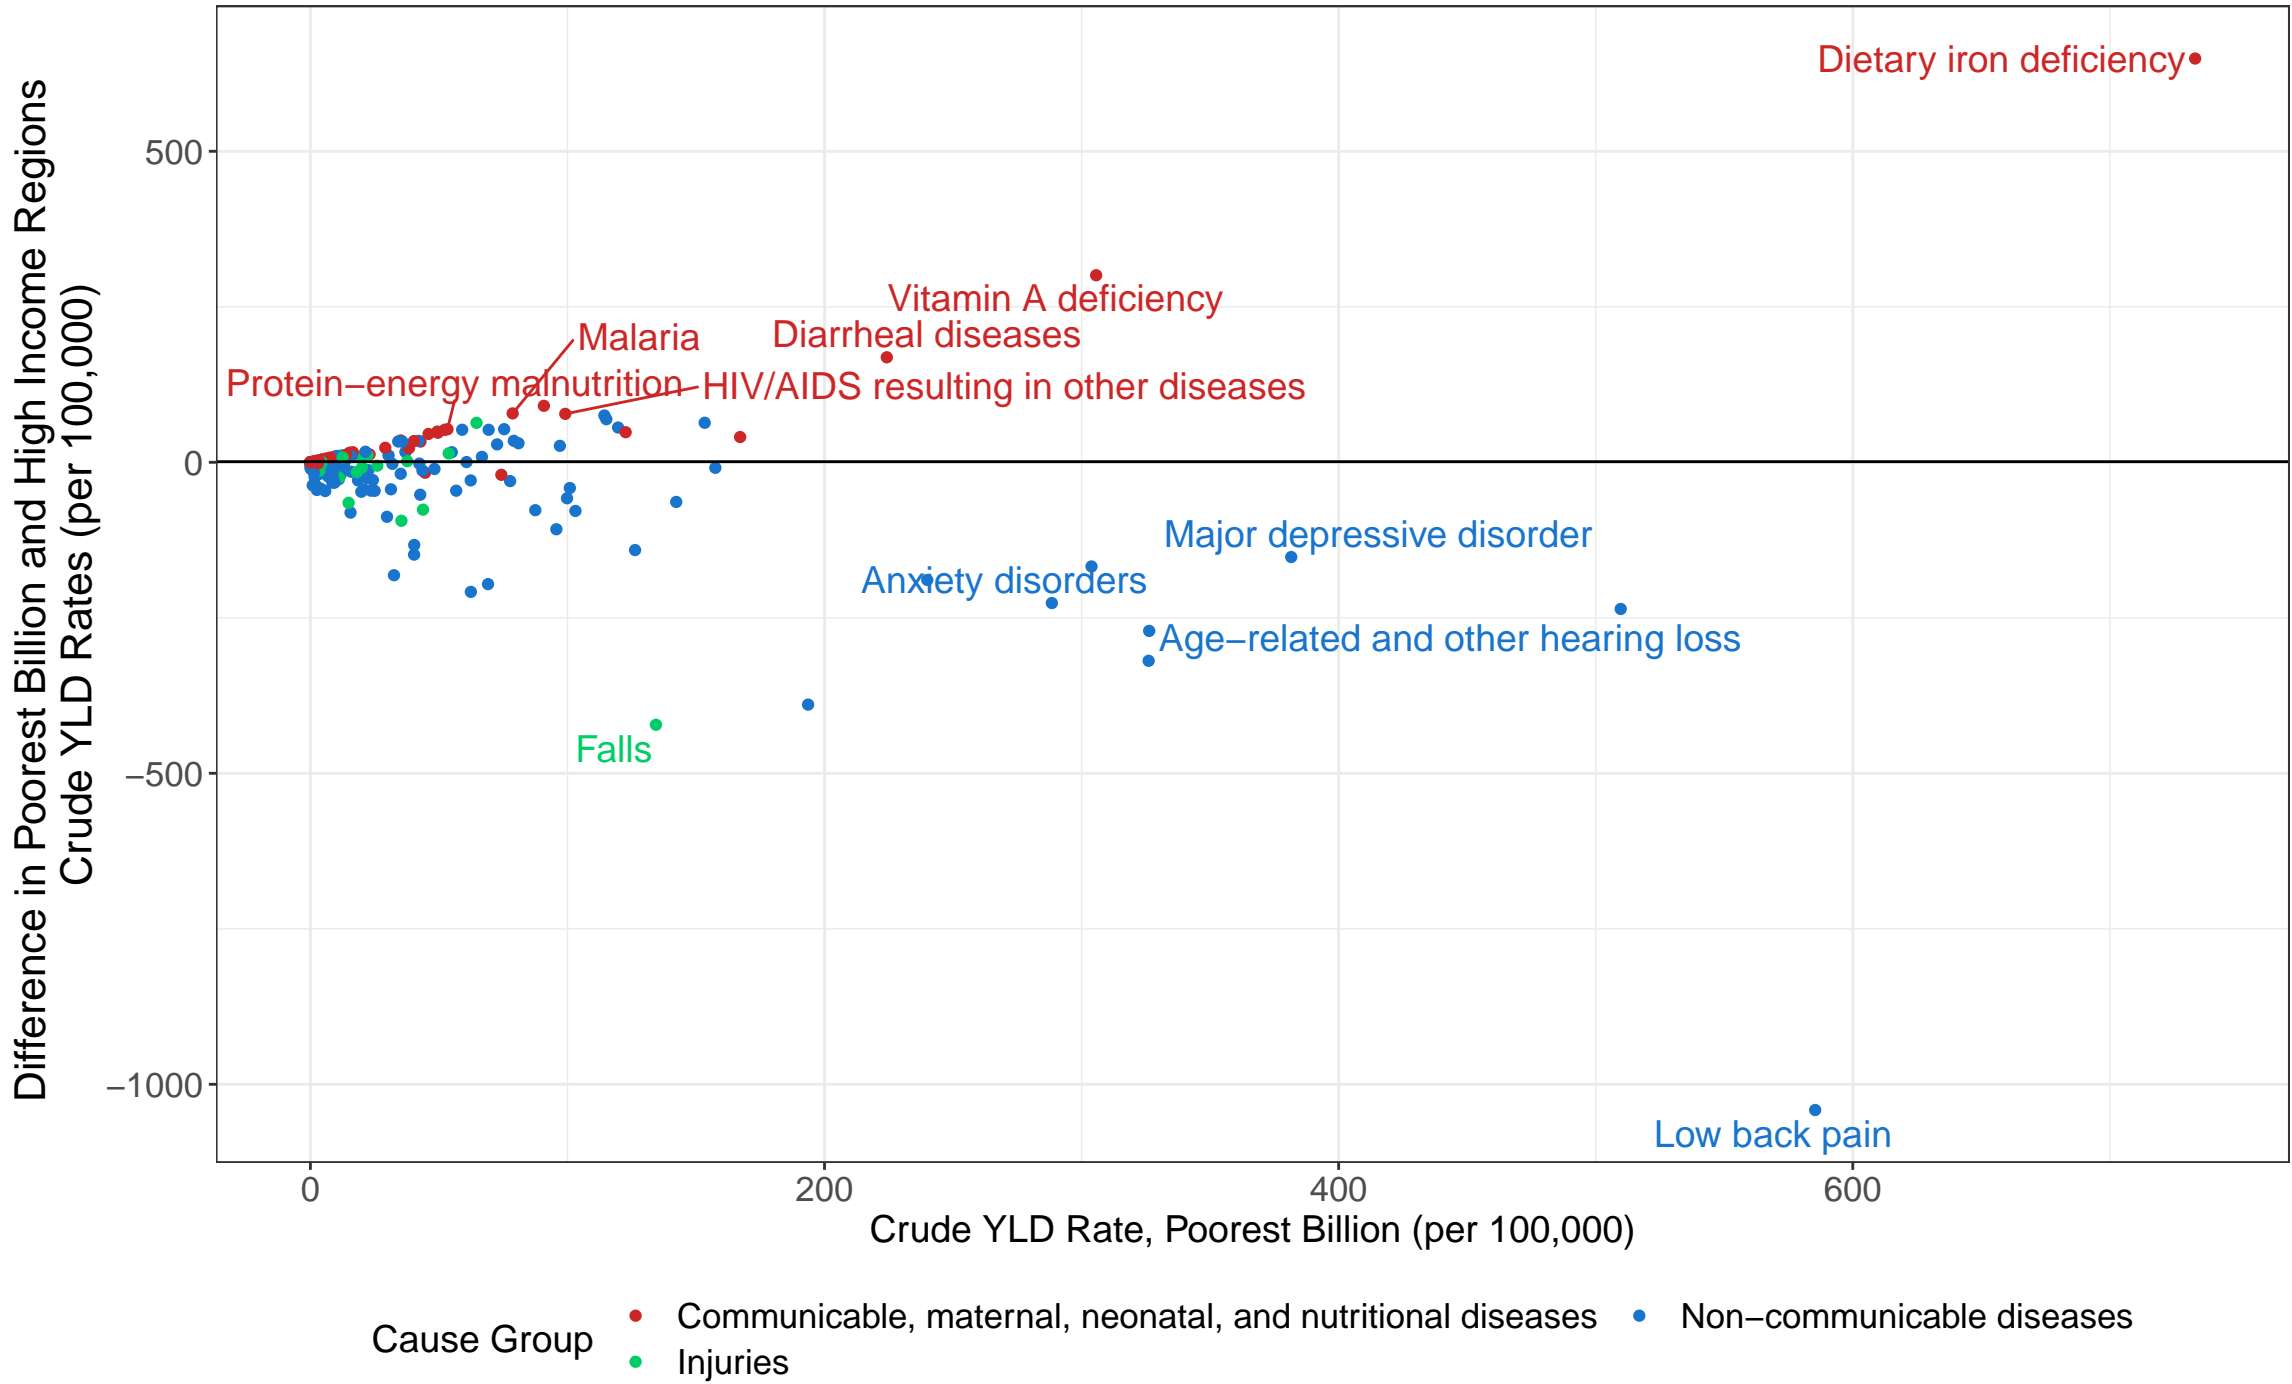

Appendix Figure 10f. Difference between Age-standardized YLD Rates in Poorest Billion and High-income Regions, Poorest Billion Aggregation

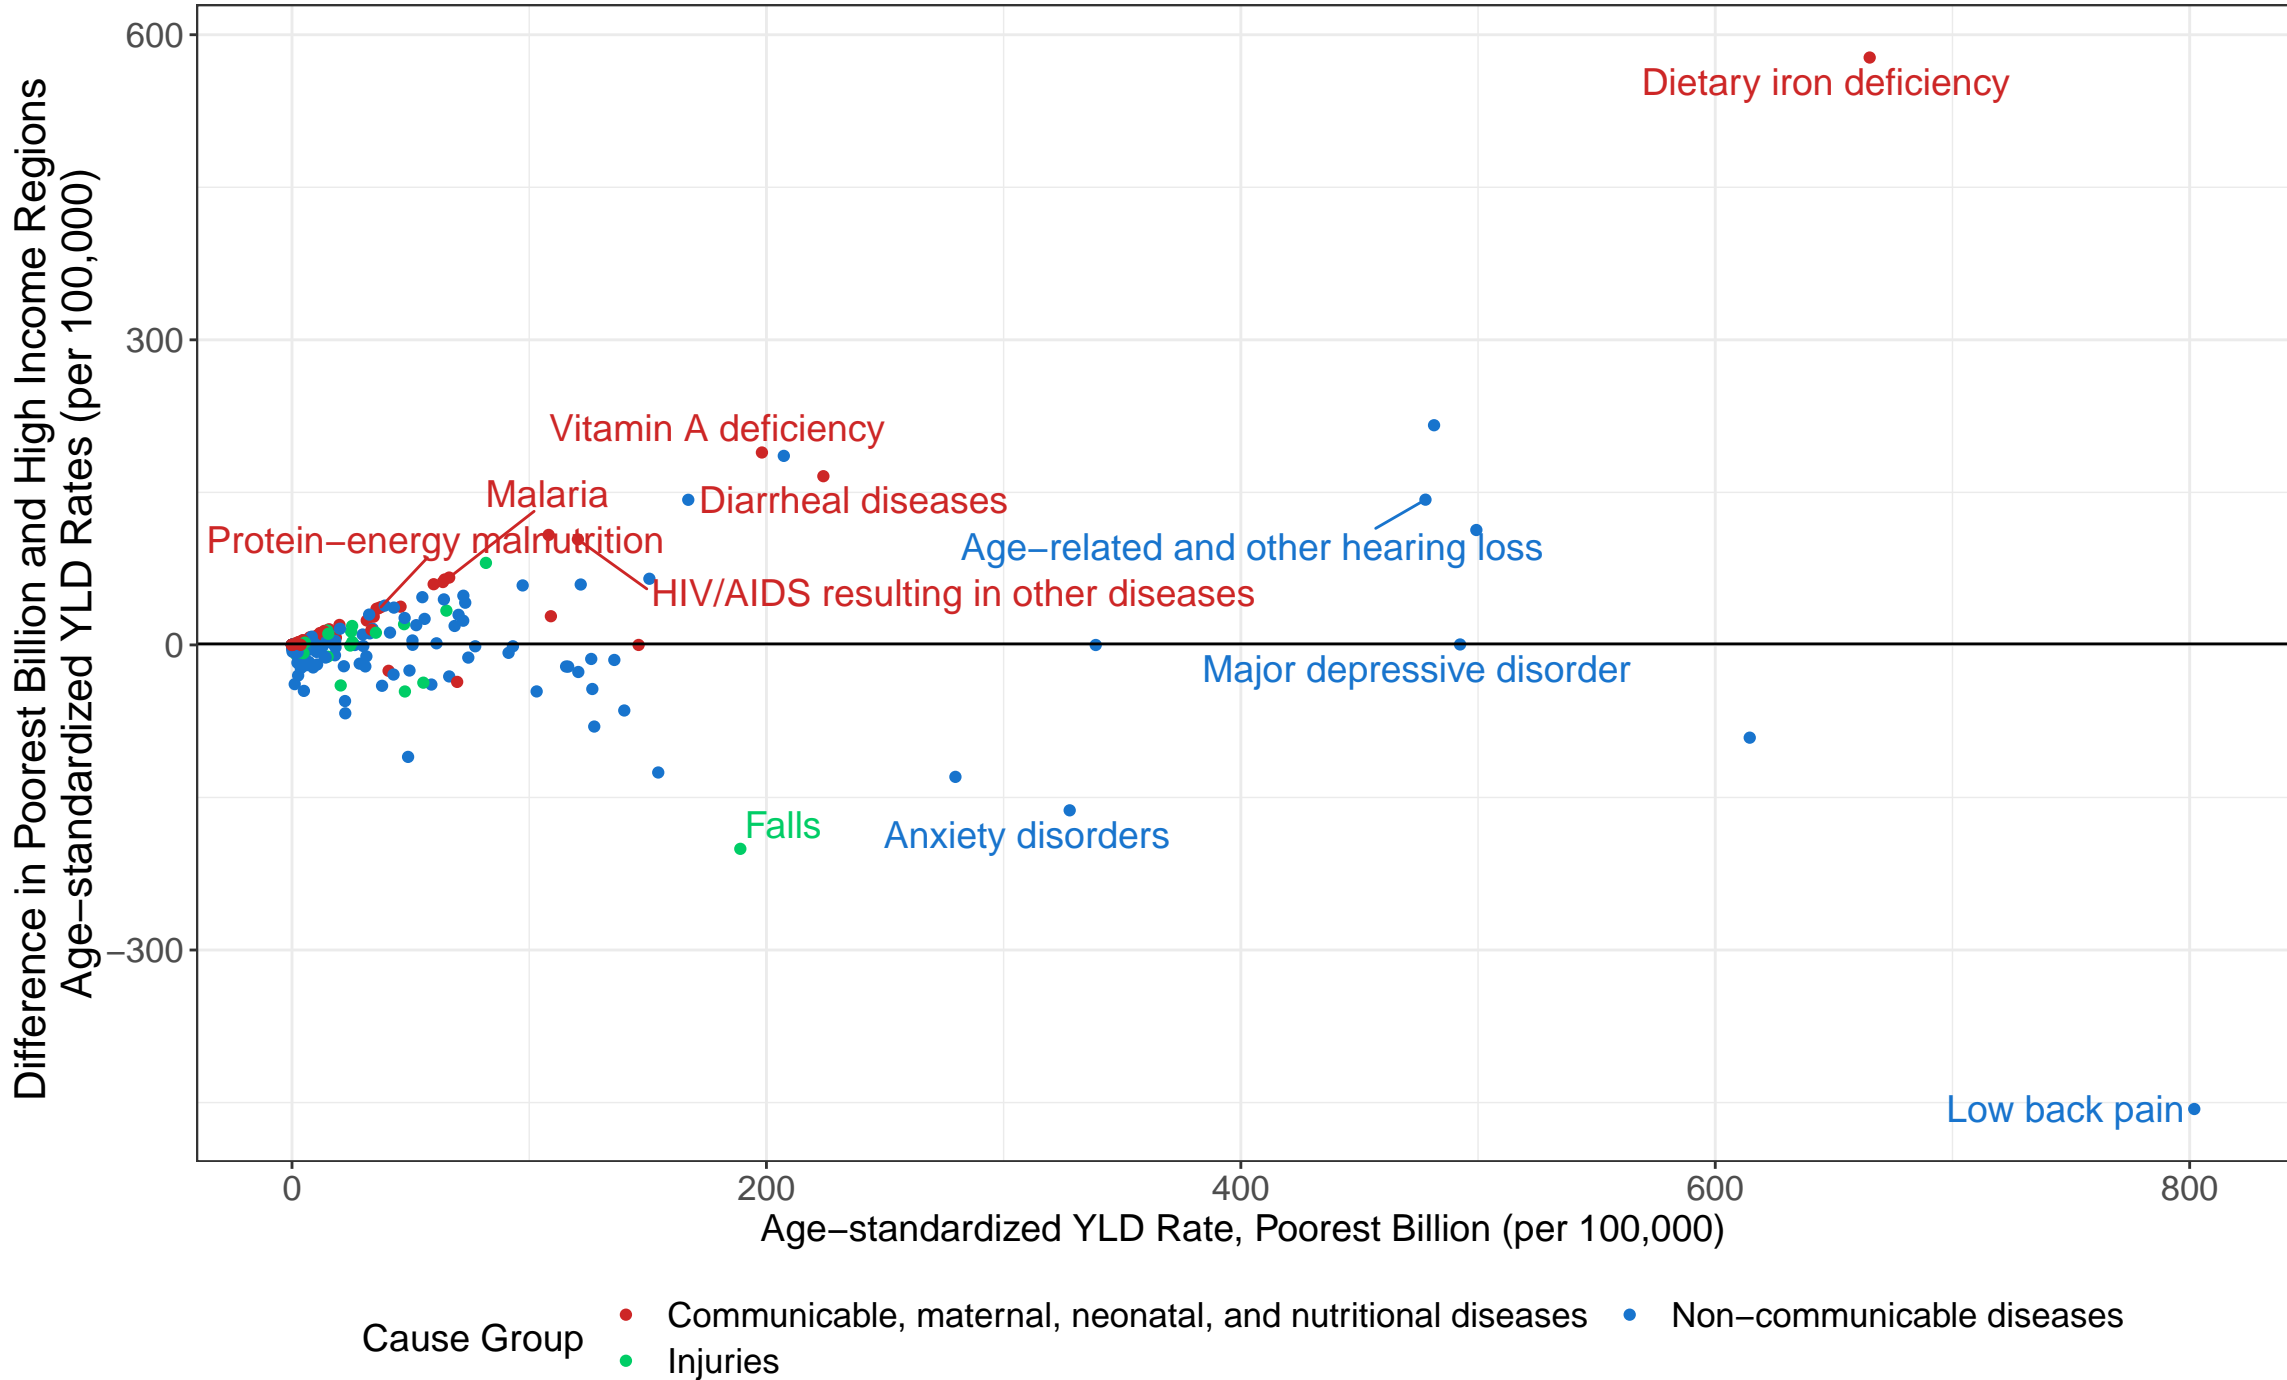

Appendix Figure 10g. Difference between Crude YLD Rates in Poorest Billion and High-income Regions, Country Aggregation

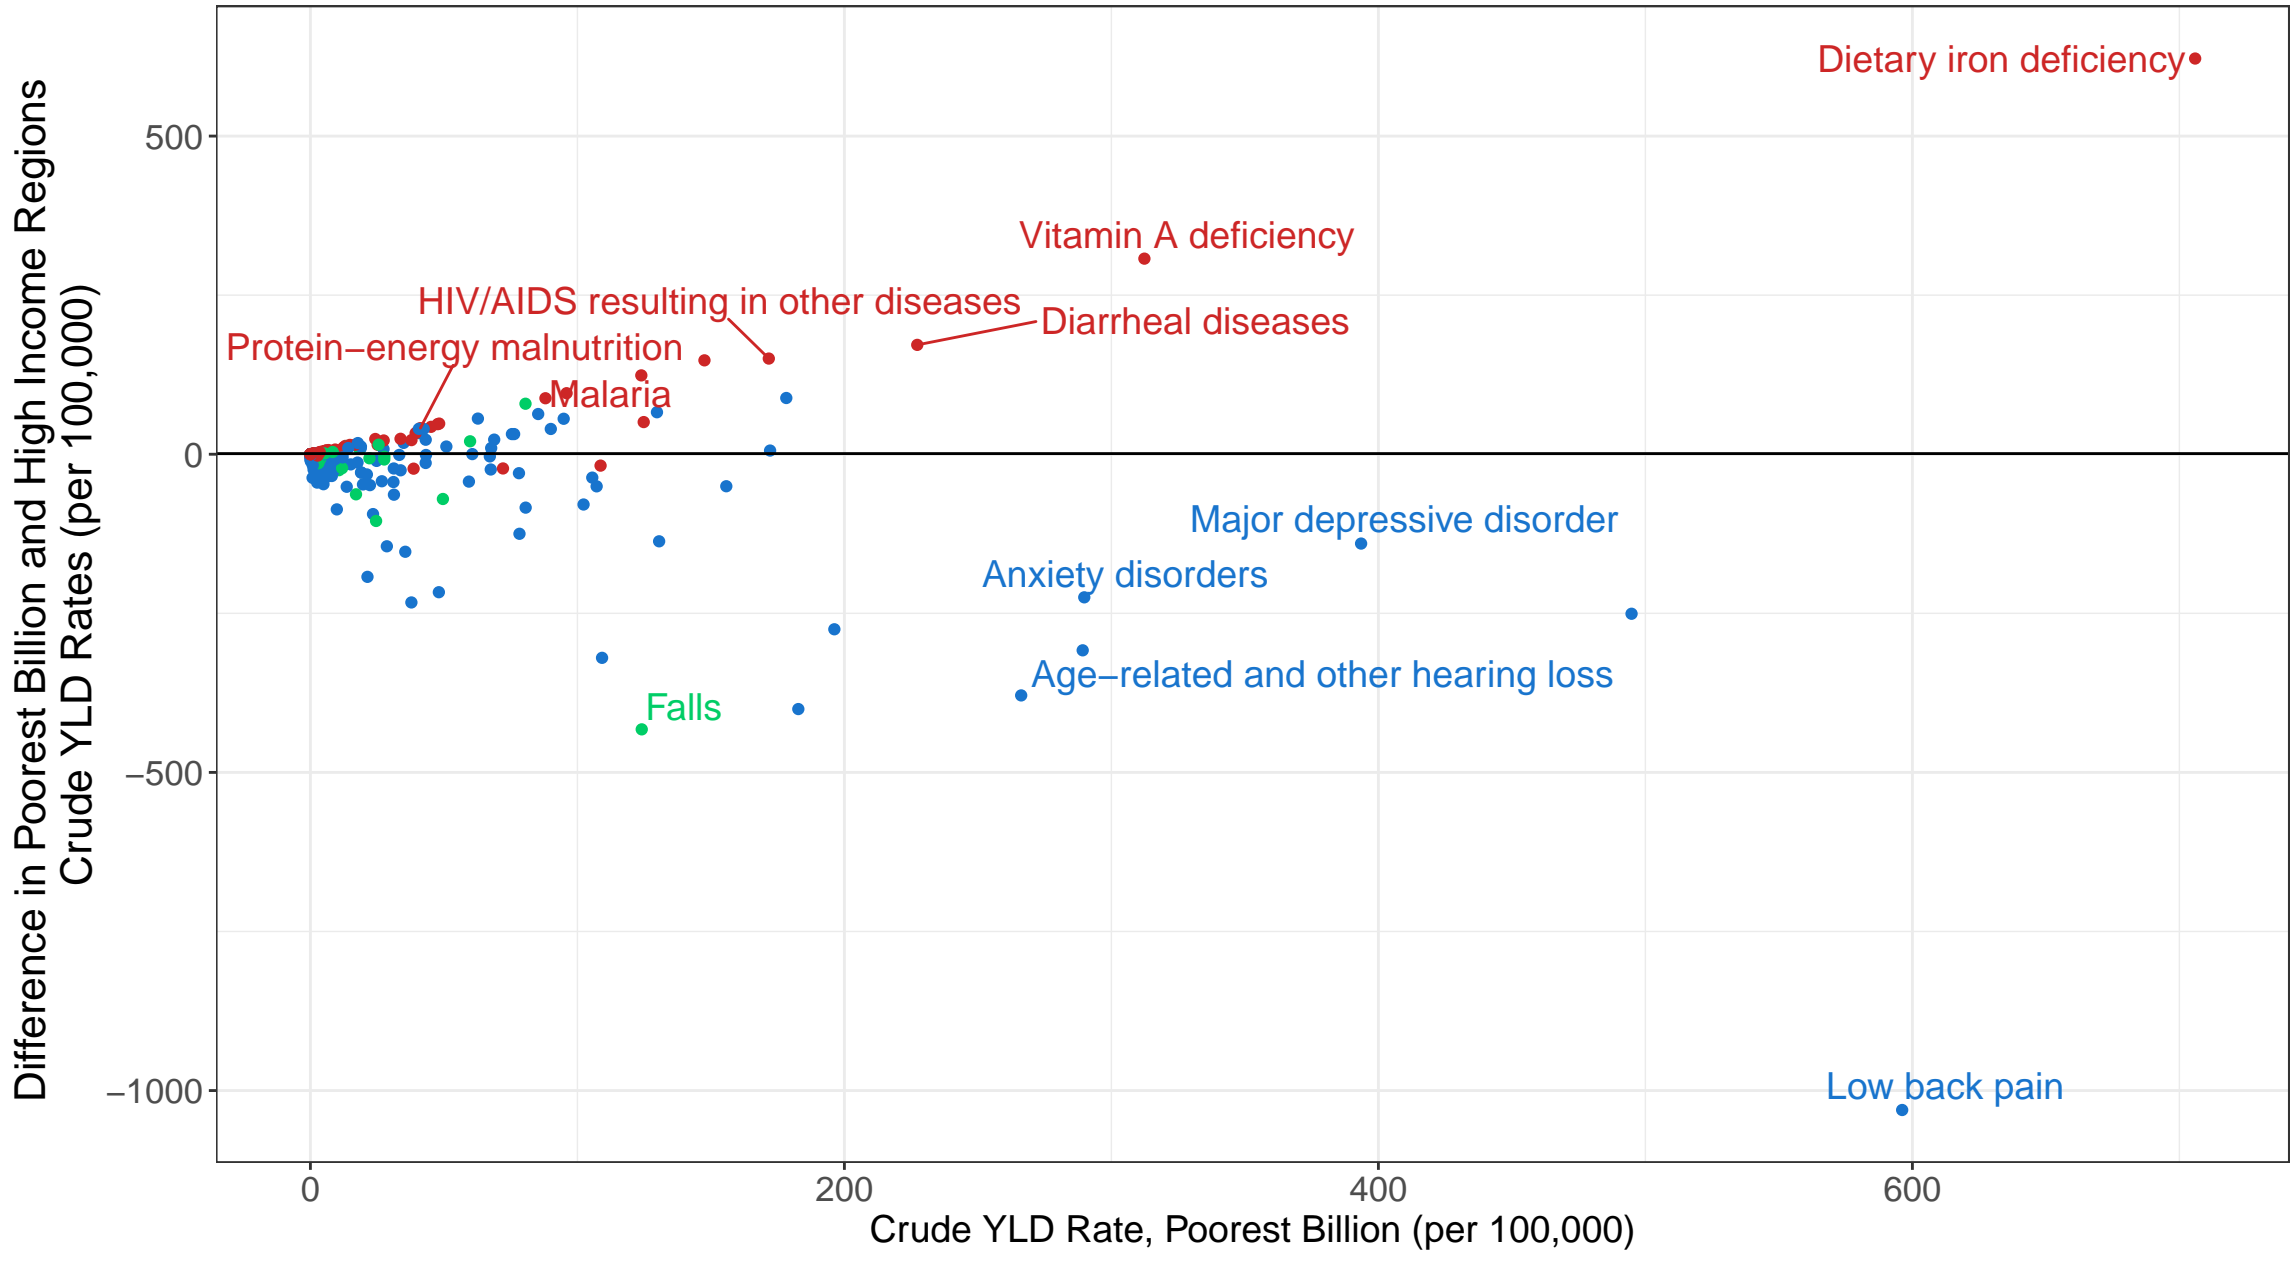

Cause Group

- Communicable, maternal, neonatal, and nutritional diseases
- Non-communicable diseases
- Injuries





Appendix Figure 10i. Difference between Crude YLD Rates in Low-income and High-income Regions

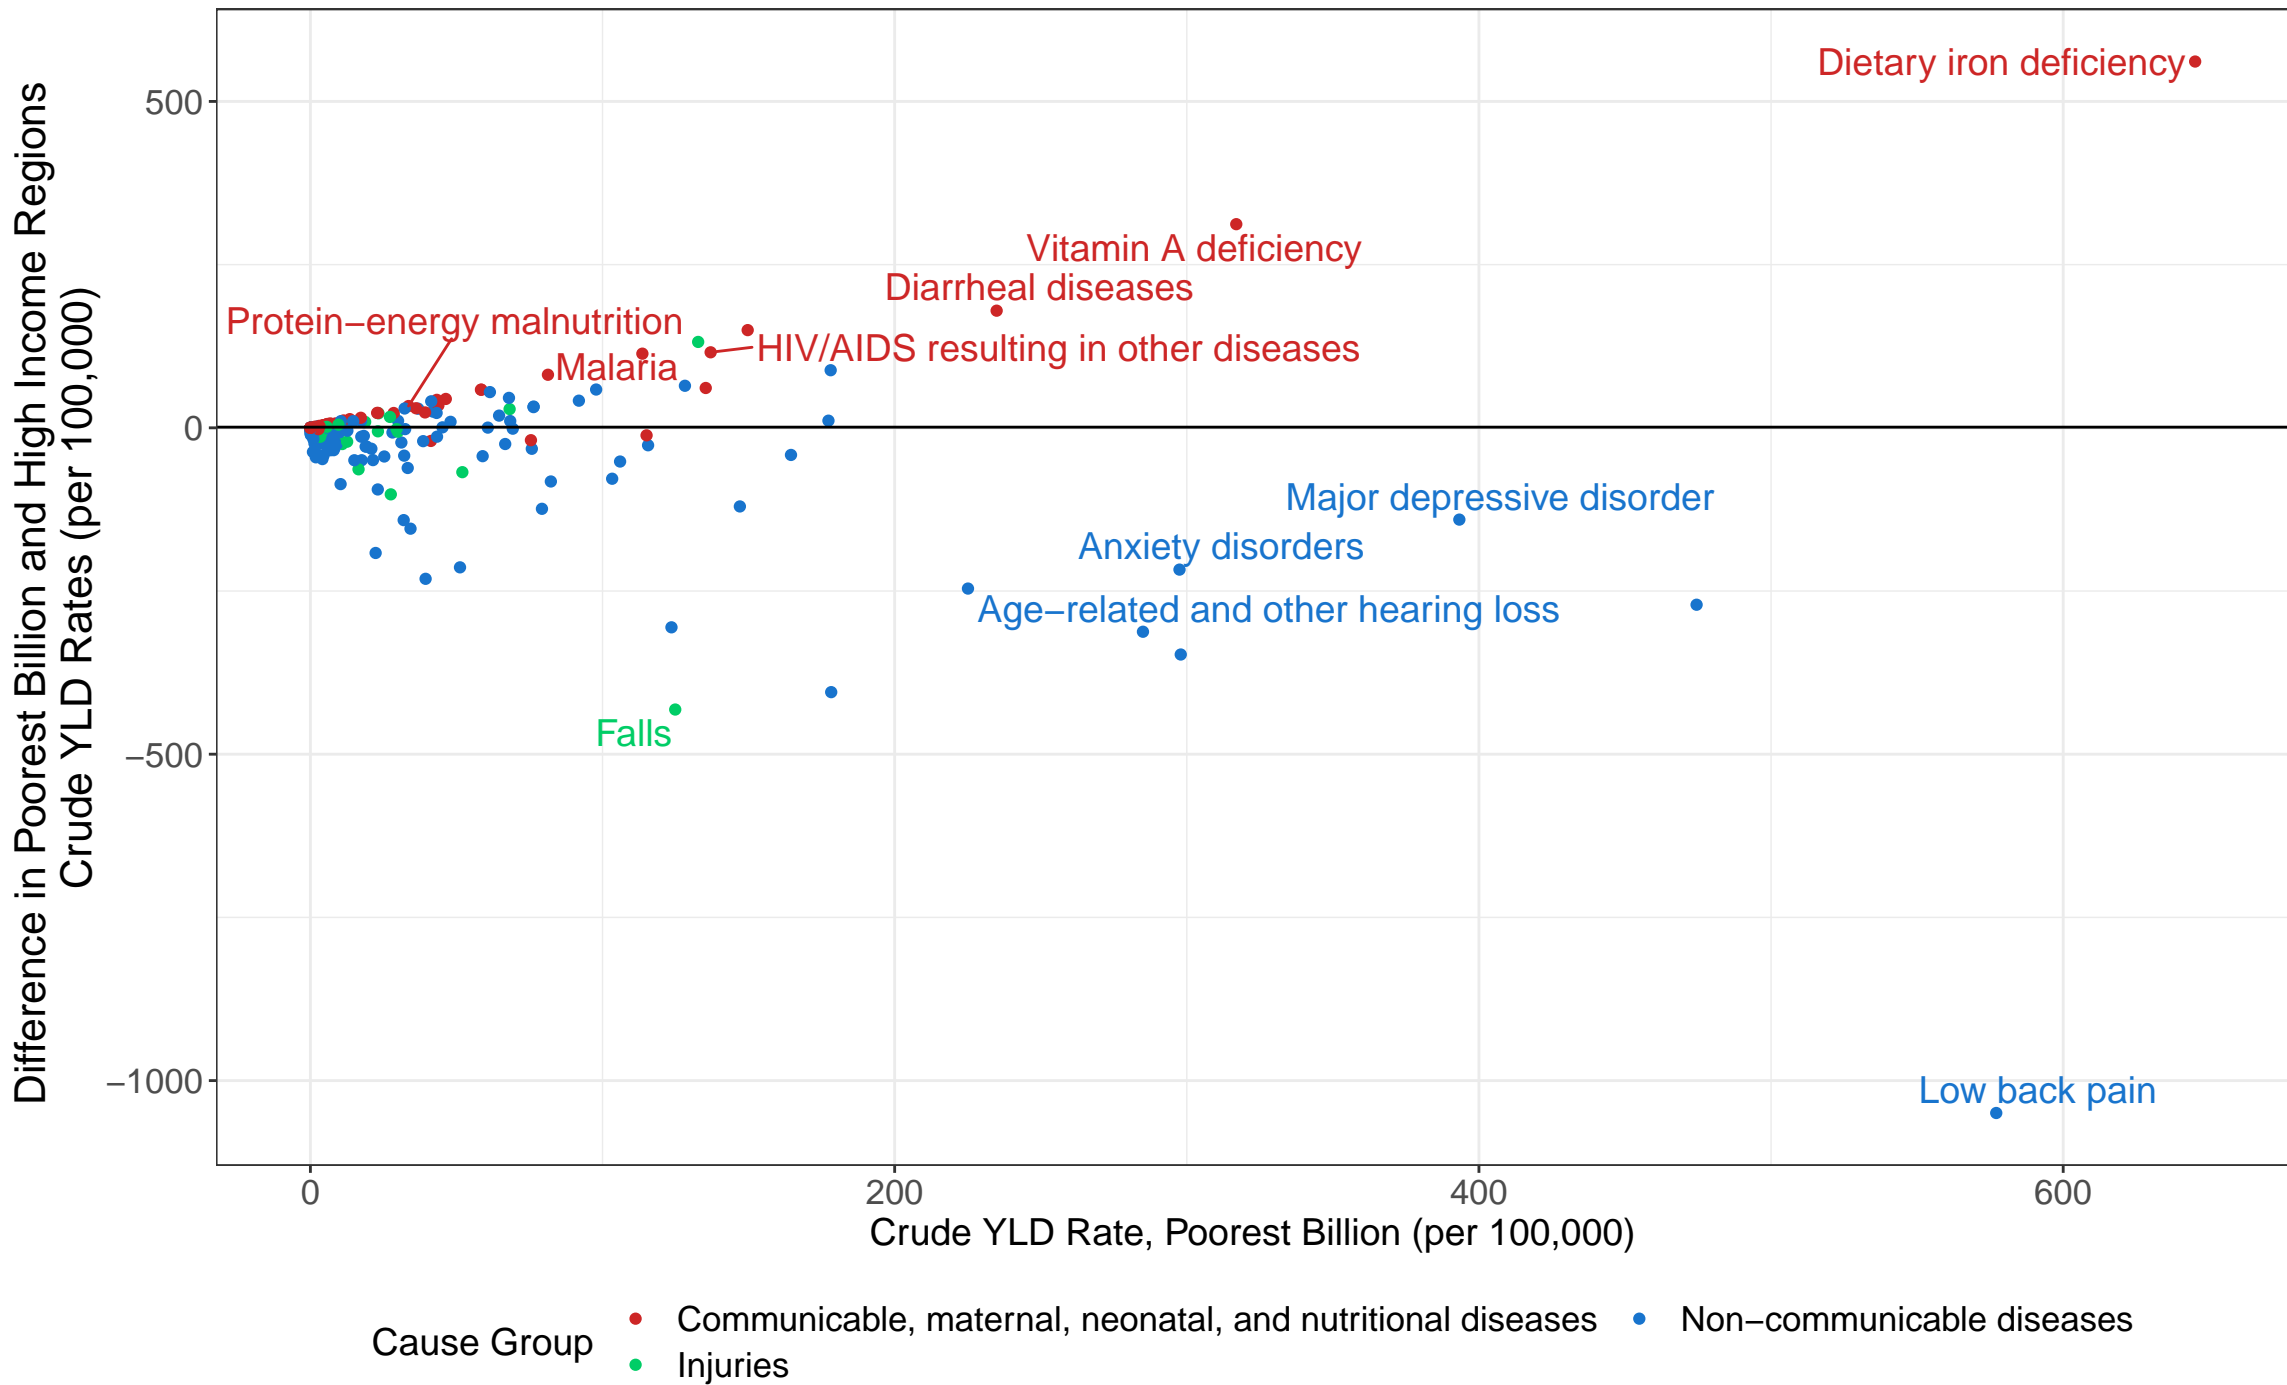

Appendix Figure 10j. Difference between Age-standardized YLD Rates in Low-income and High-income Regions

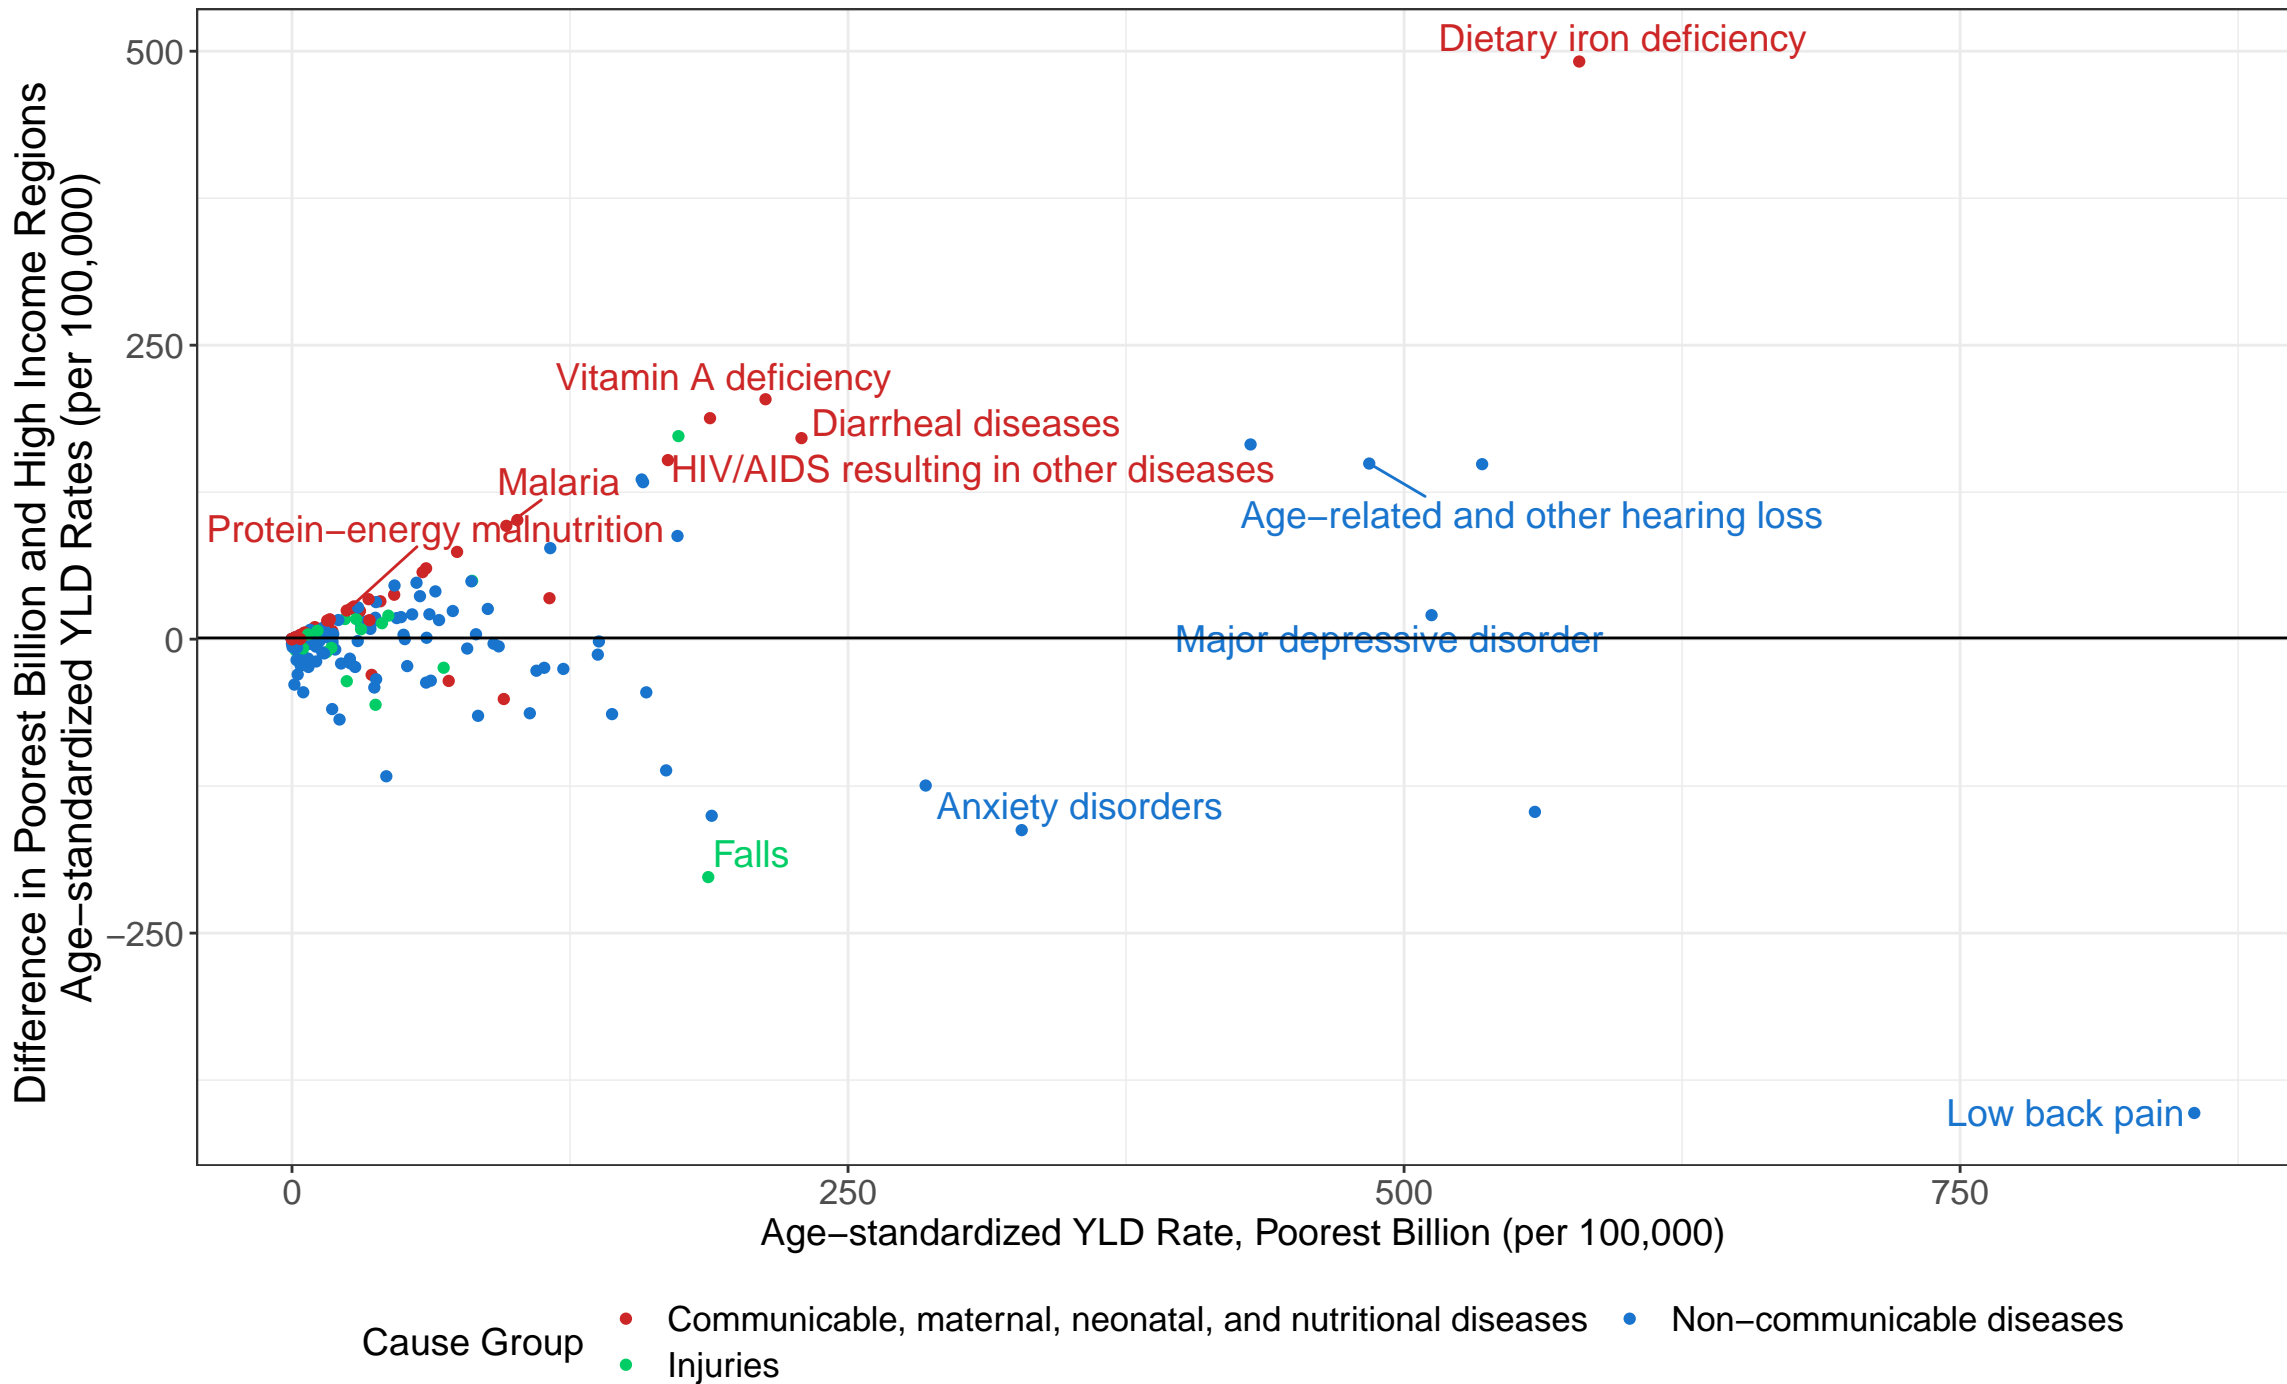

Appendix Figure 11a. Difference between Crude YLL Rates in Poorest Billion and High-income Regions, Selective Ecological Approach

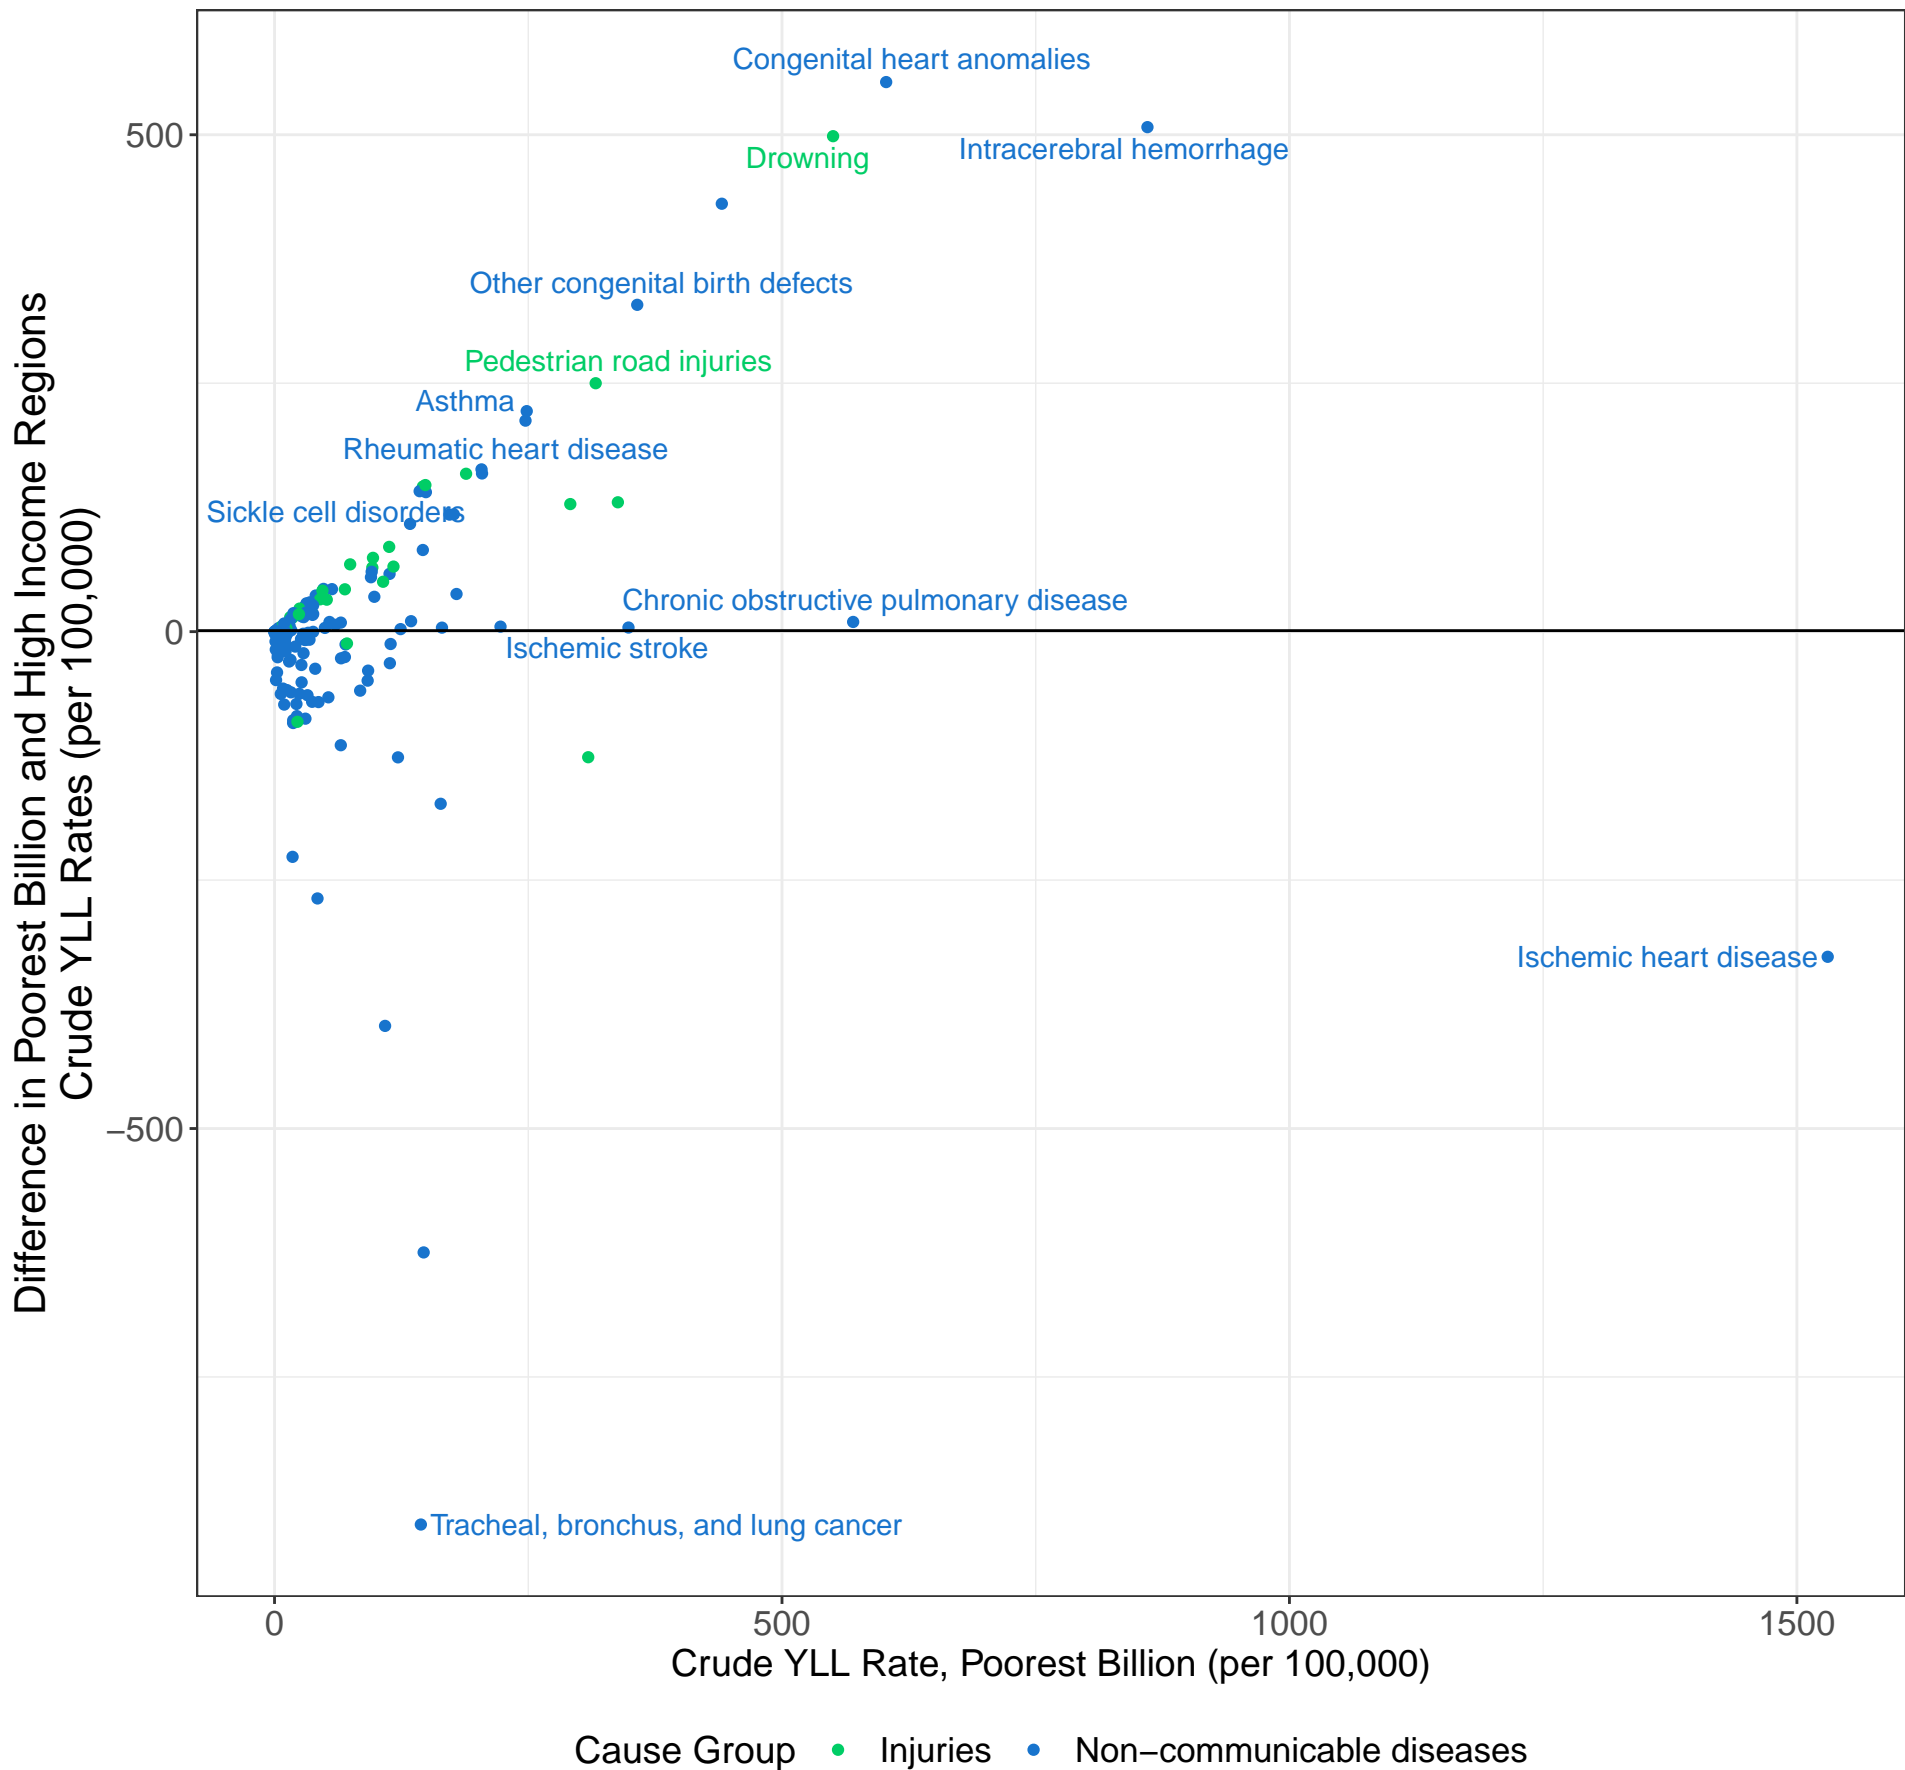

Appendix Figure 11b. Difference between Age-standardized YLL Rates in Poorest Billion and High Income Regions, Selective Ecological Approach

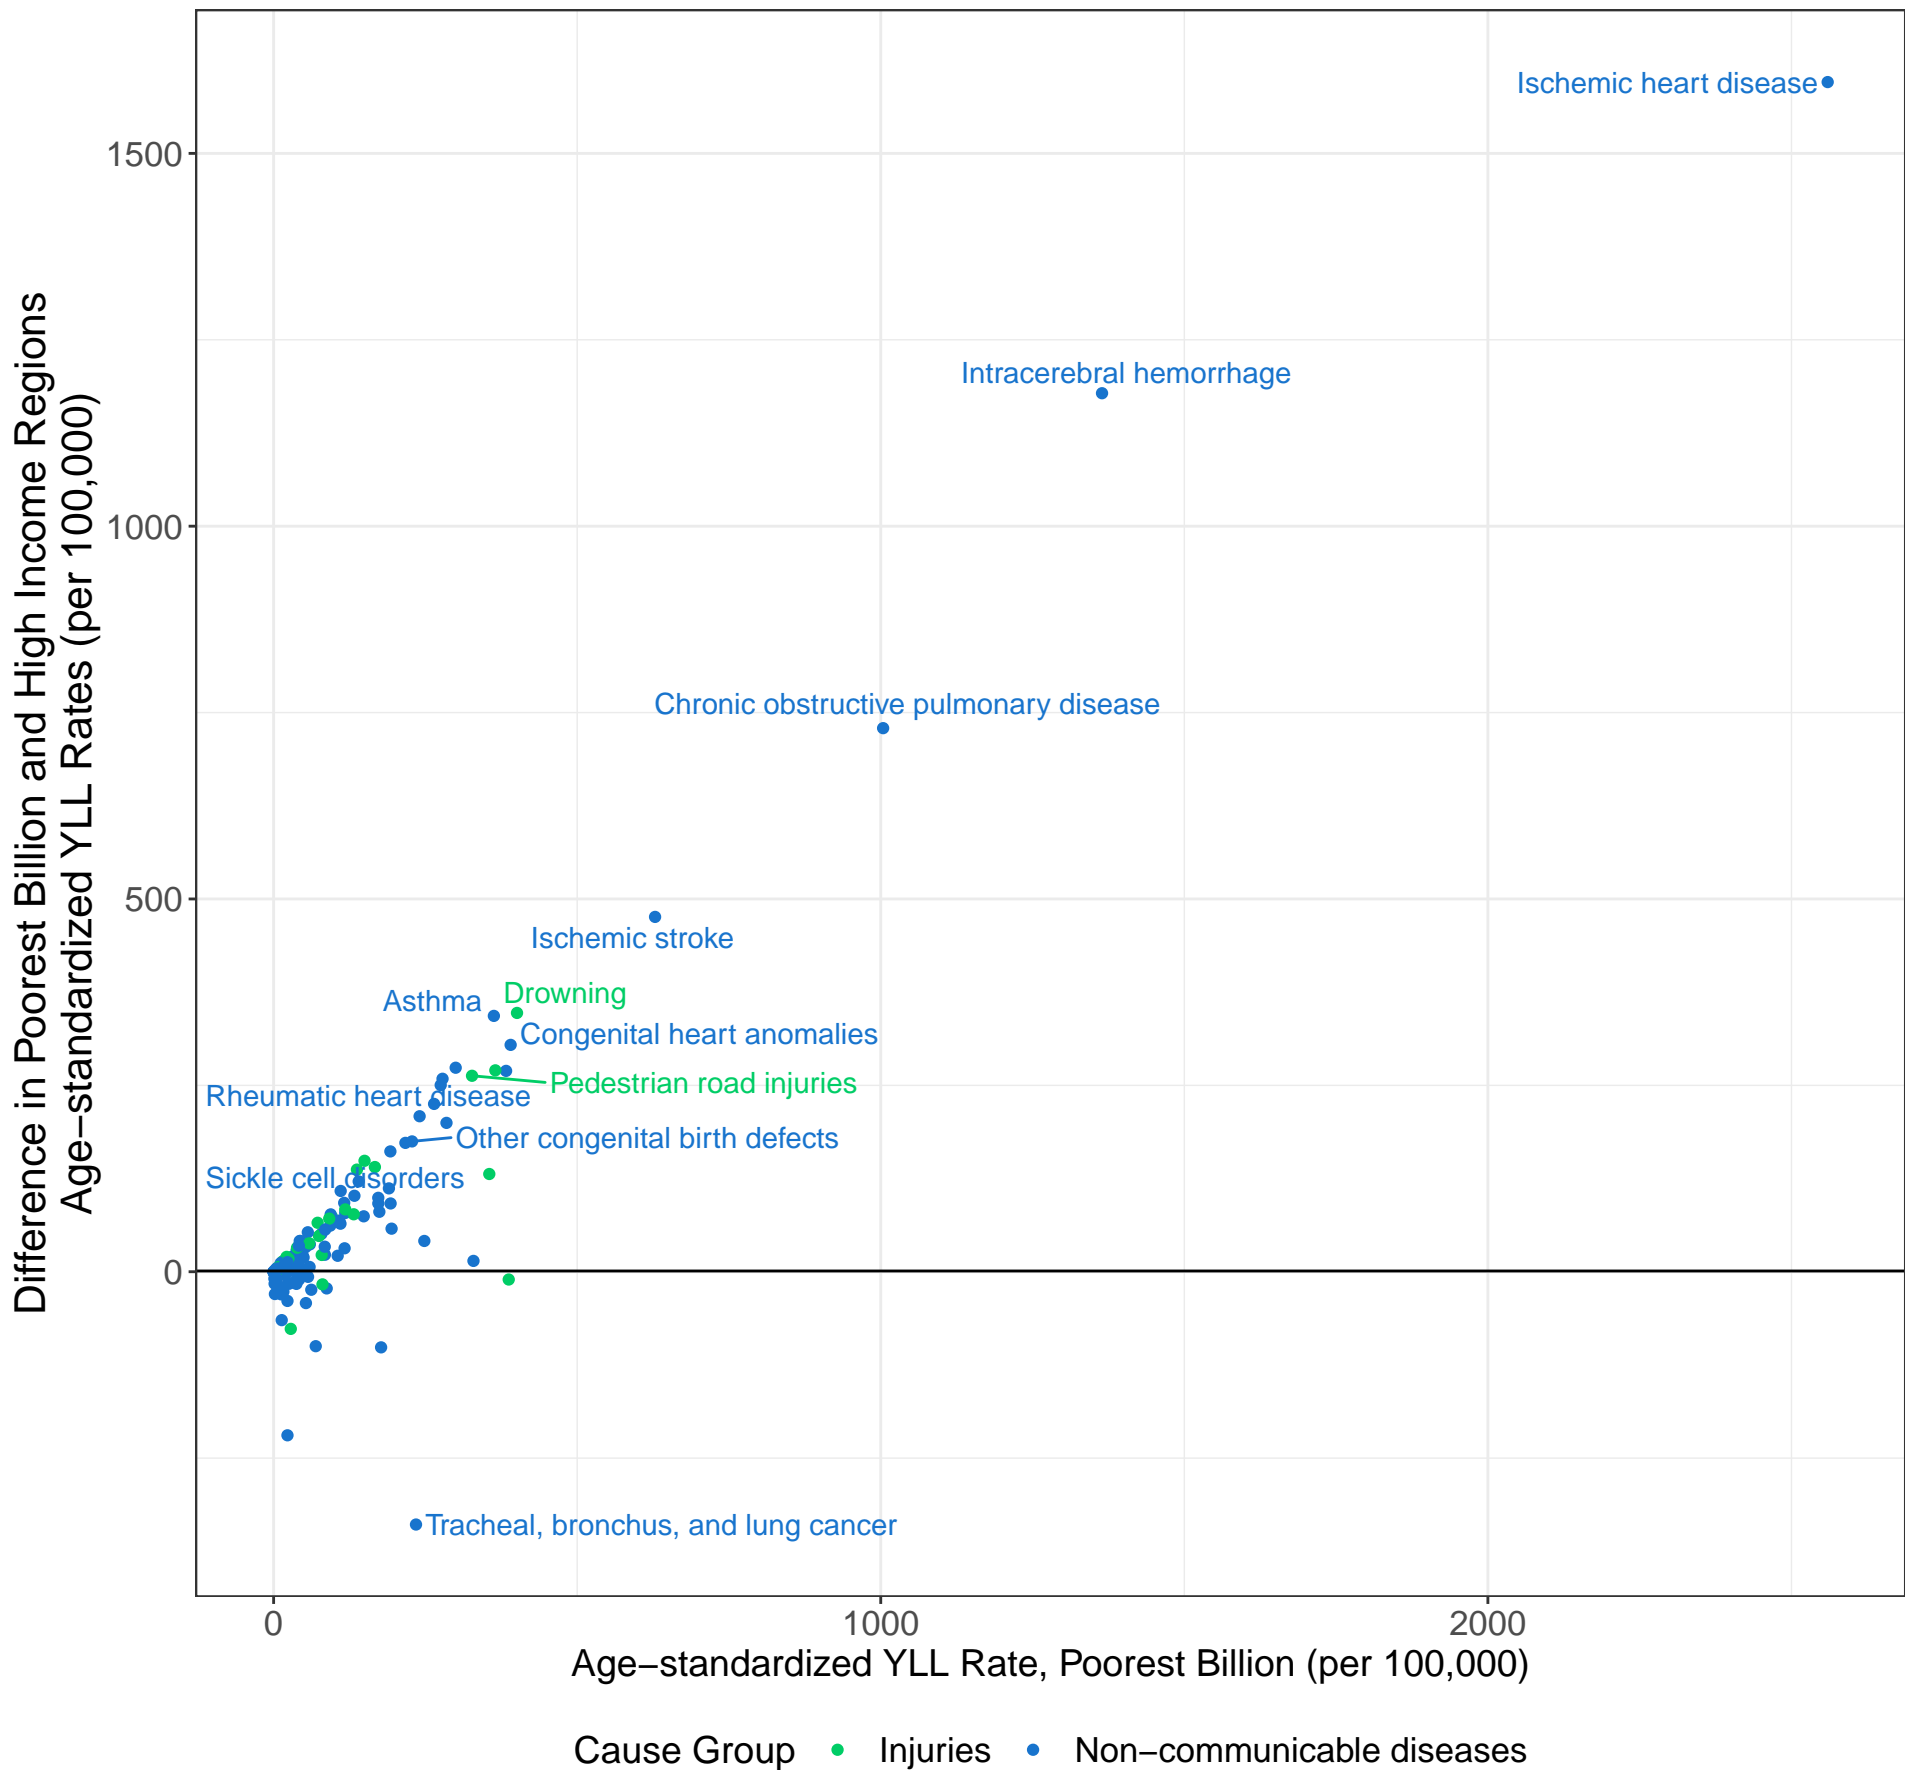

Appendix Figure 11c. Difference between Crude YLL Rates in Poorest Billion and High-income Regions, Full Ecological Approach

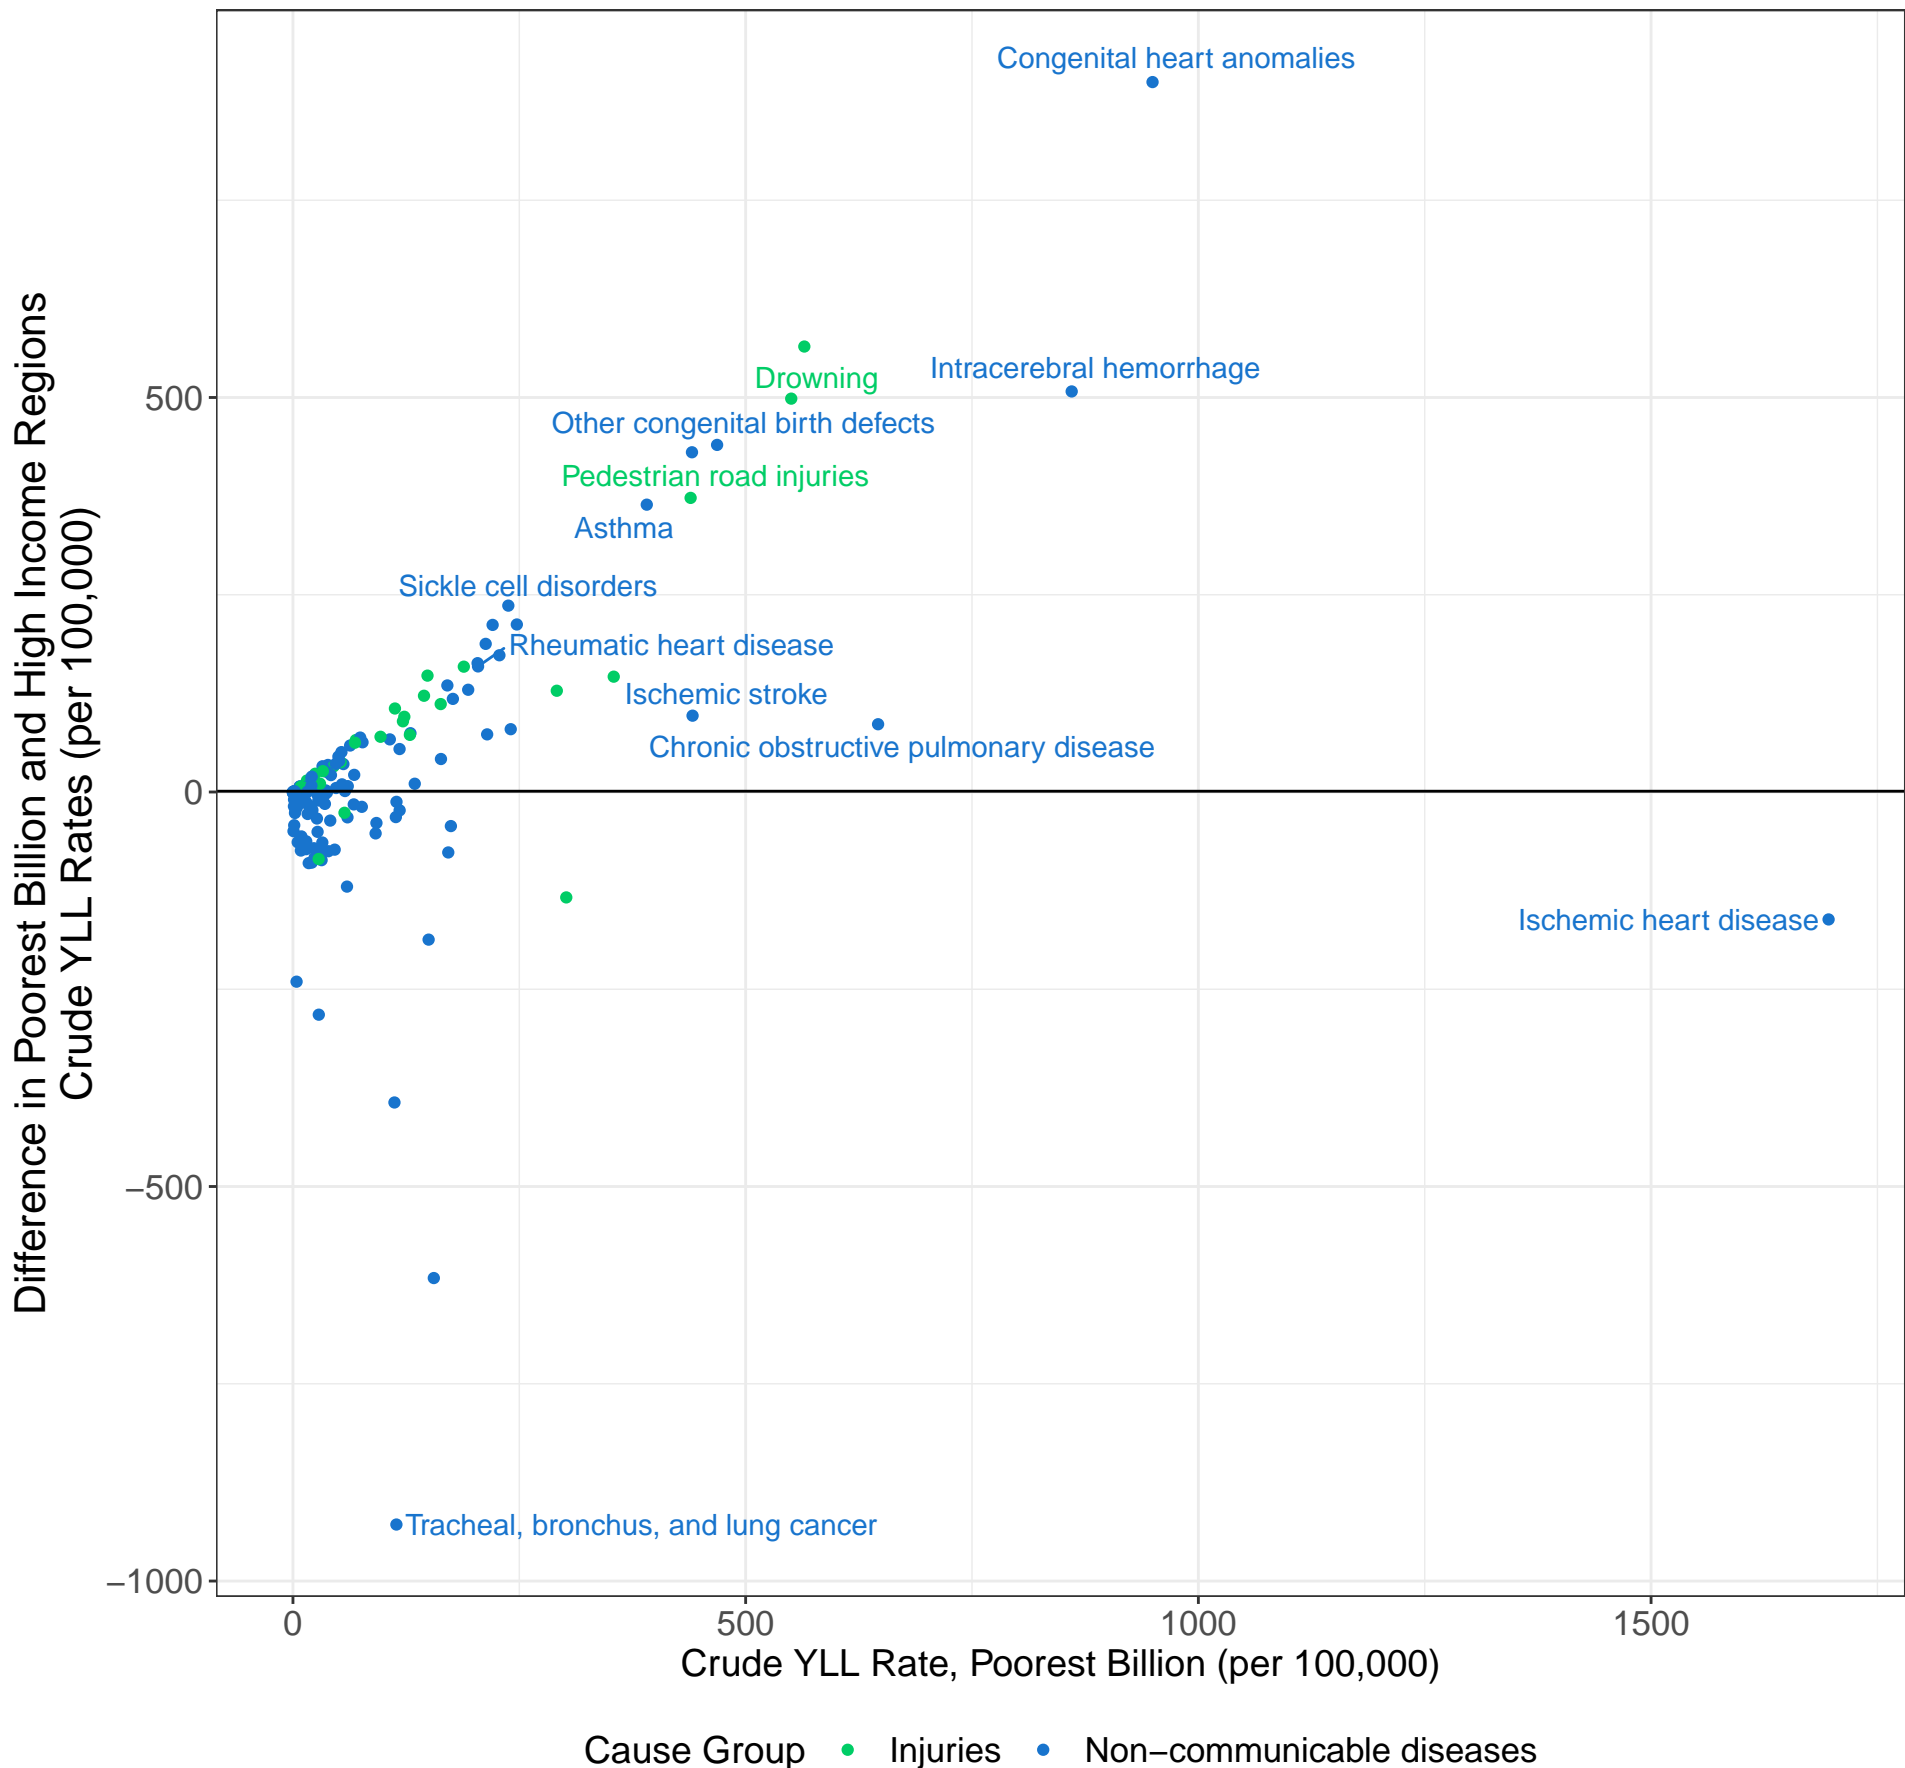

Appendix Figure 11d. Difference between Age-standardized YLL Rates in Poorest Billion and High-income Regions, Full Ecological Approach

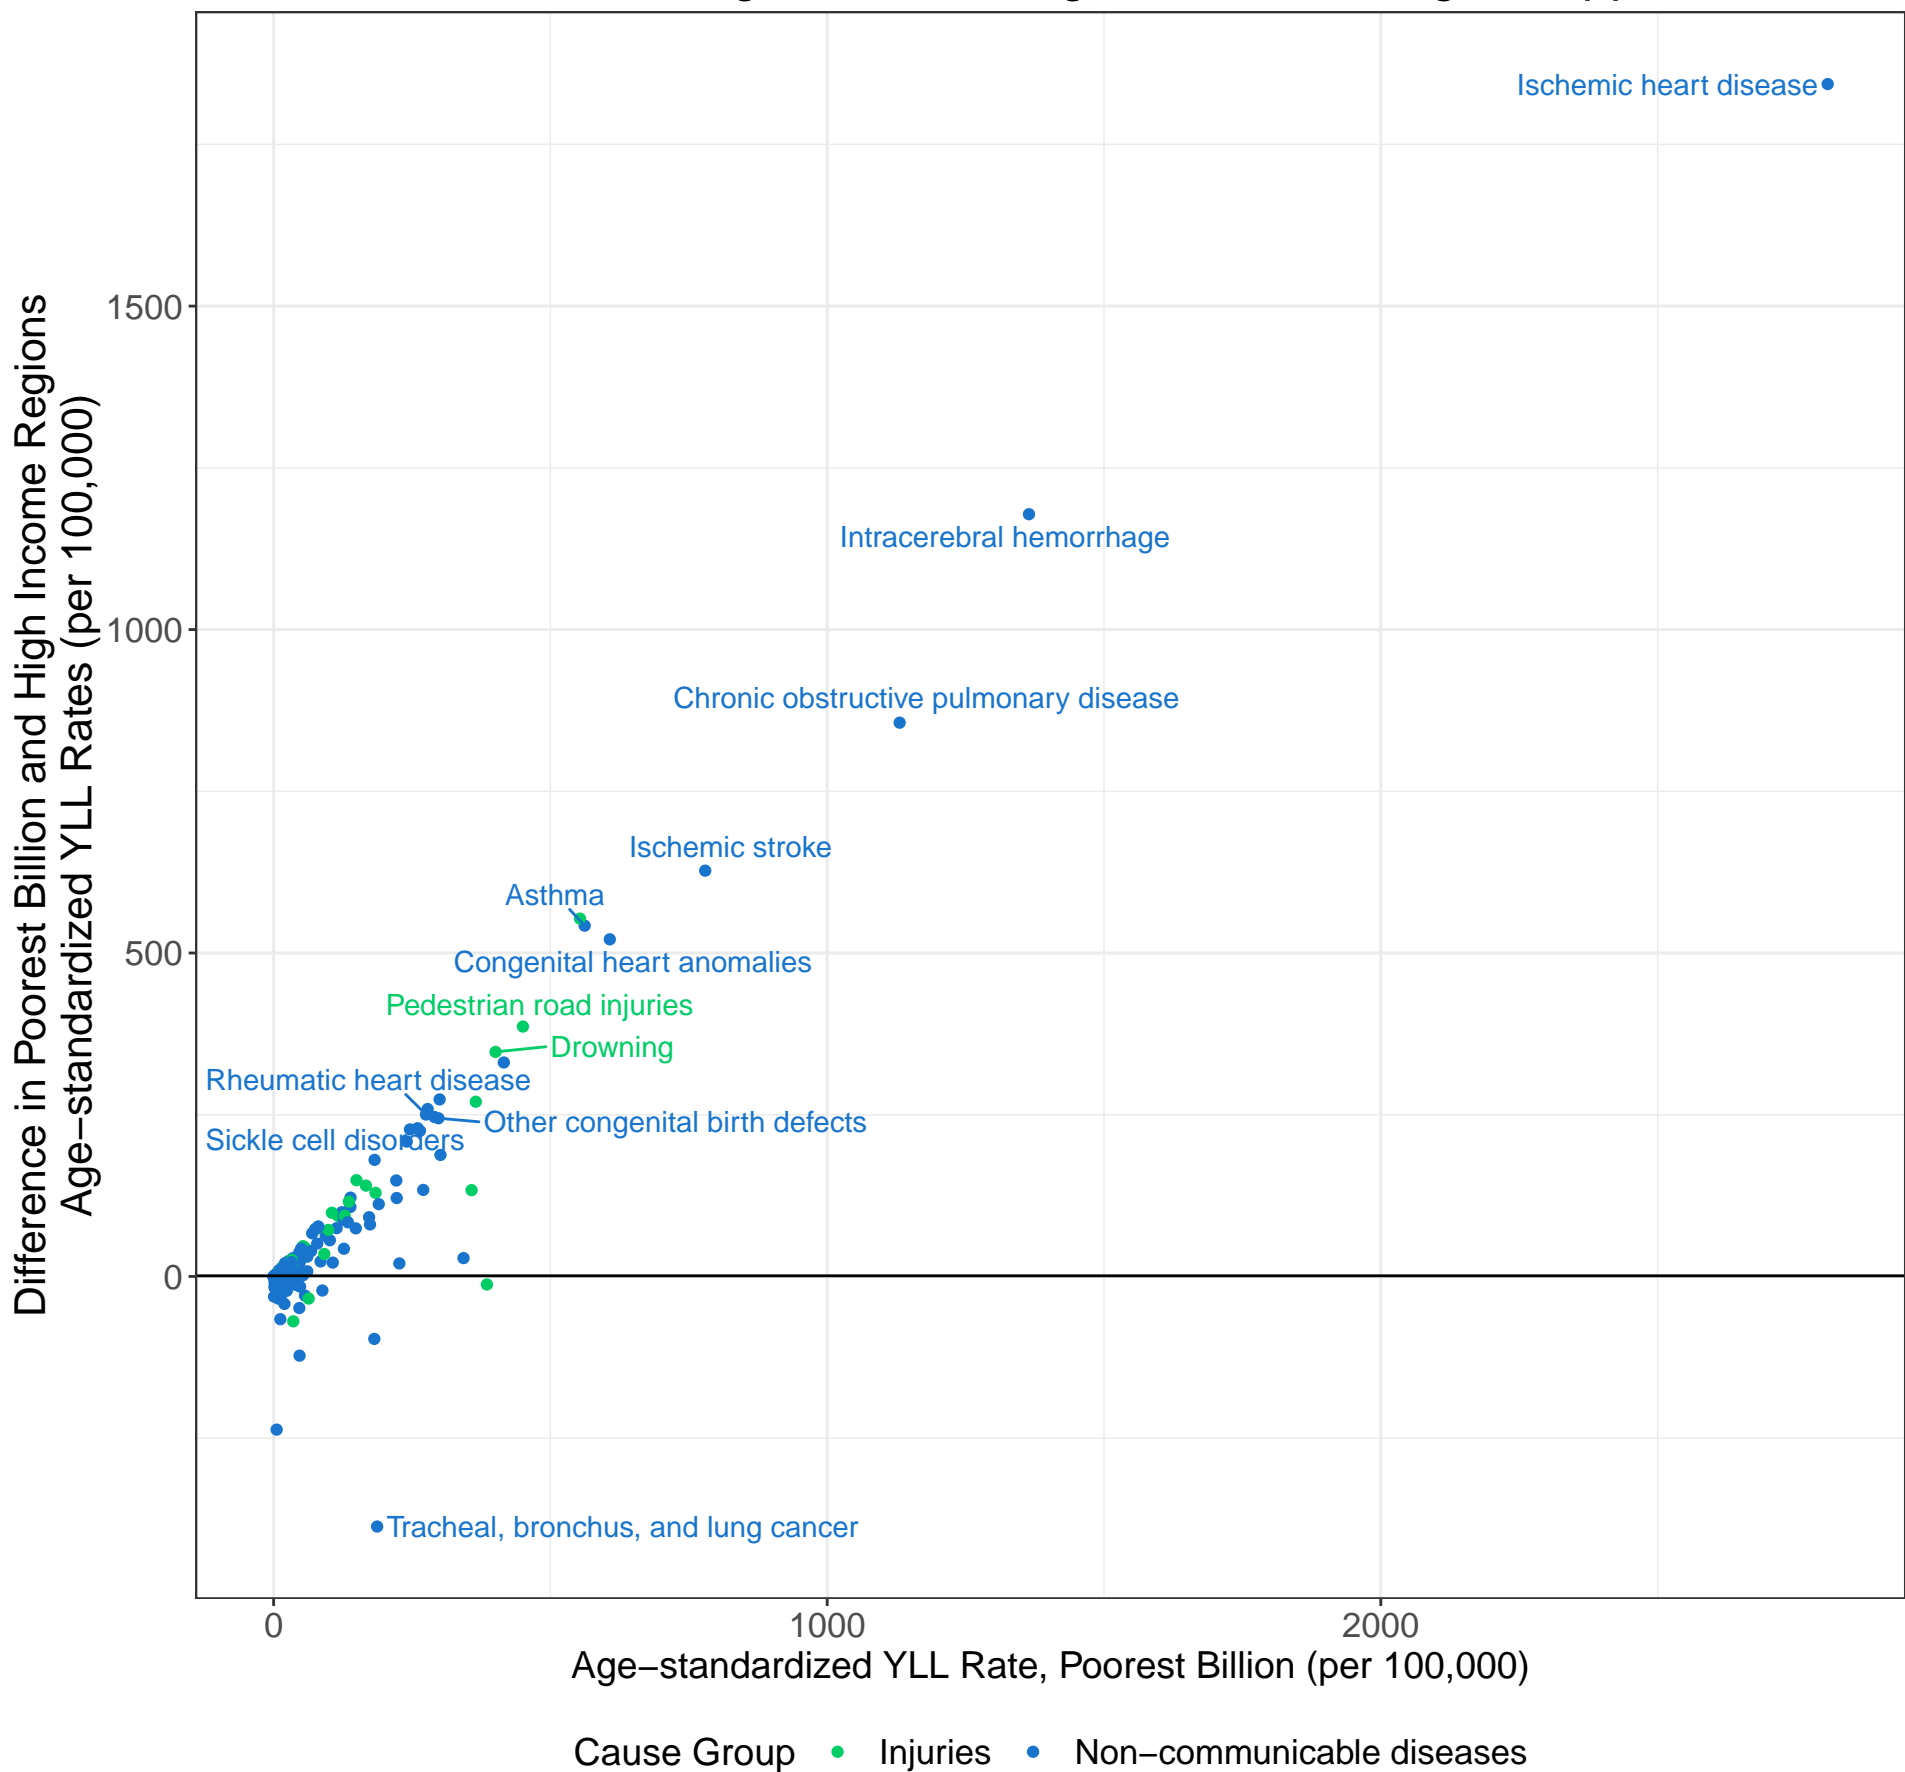

Appendix Figure 11e. Difference between Crude YLL Rates in Poorest Billion and High-income Regions, Poorest Billion Aggregation

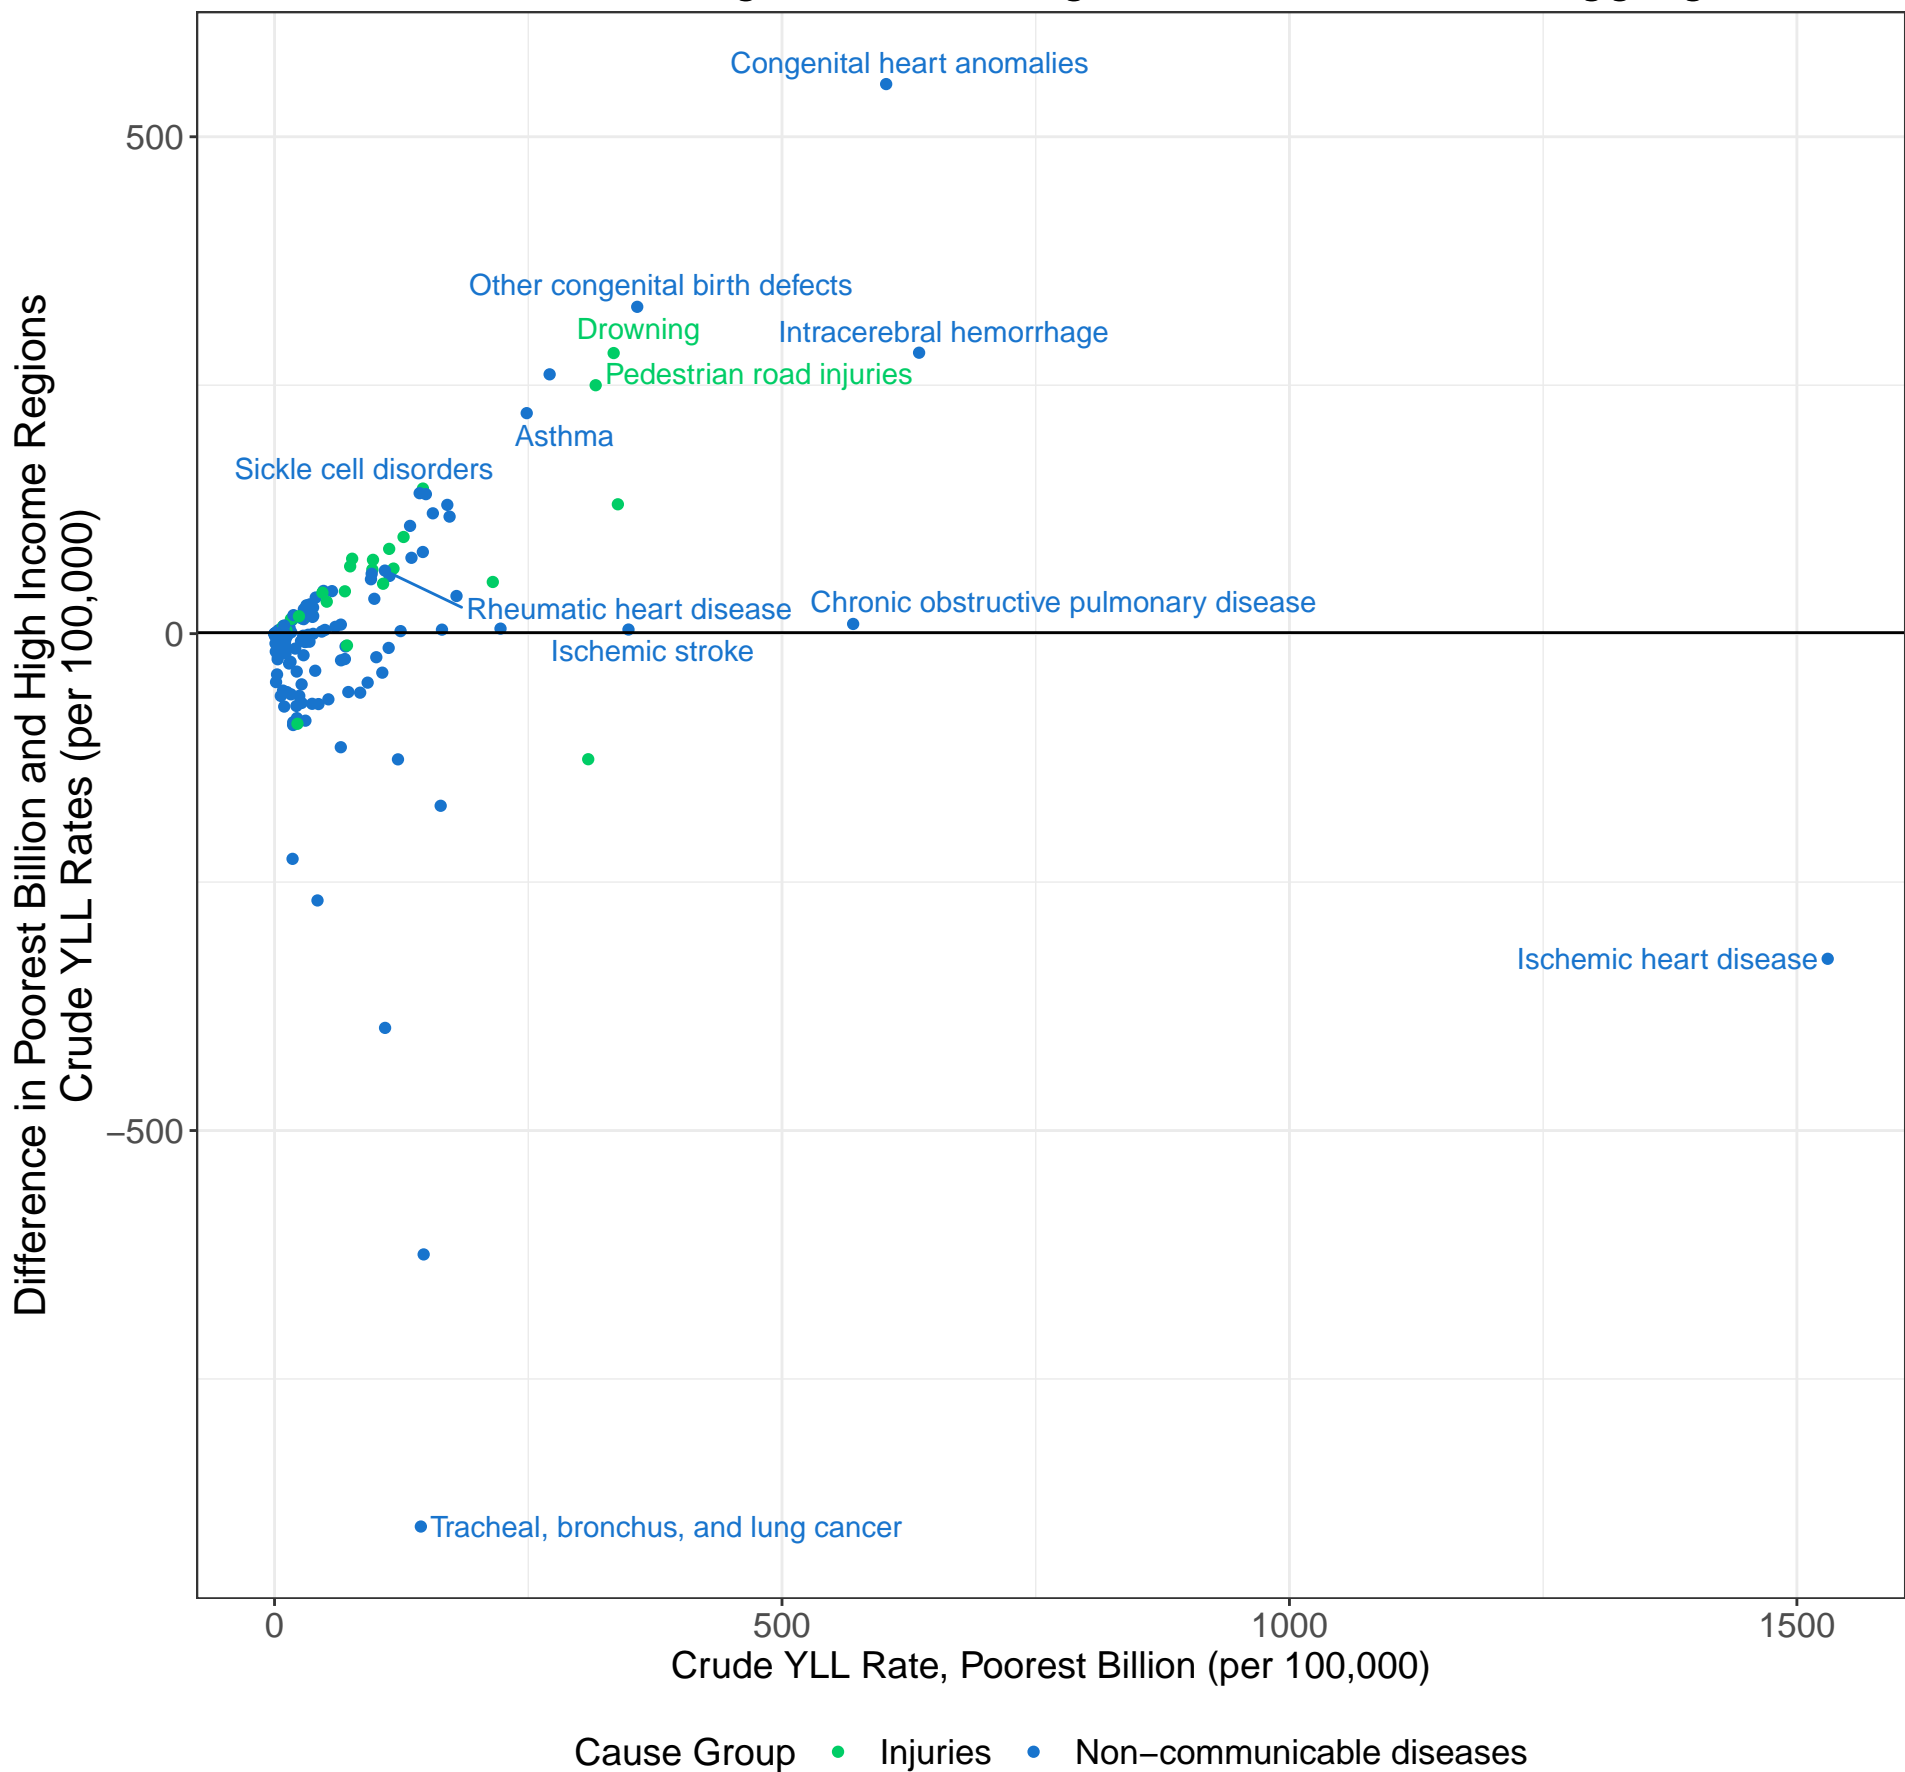

Appendix Figure 11f. Difference between Age-standardized YLL Rates in Poorest Billion and High Income Regions, Poorest Billion Aggregation

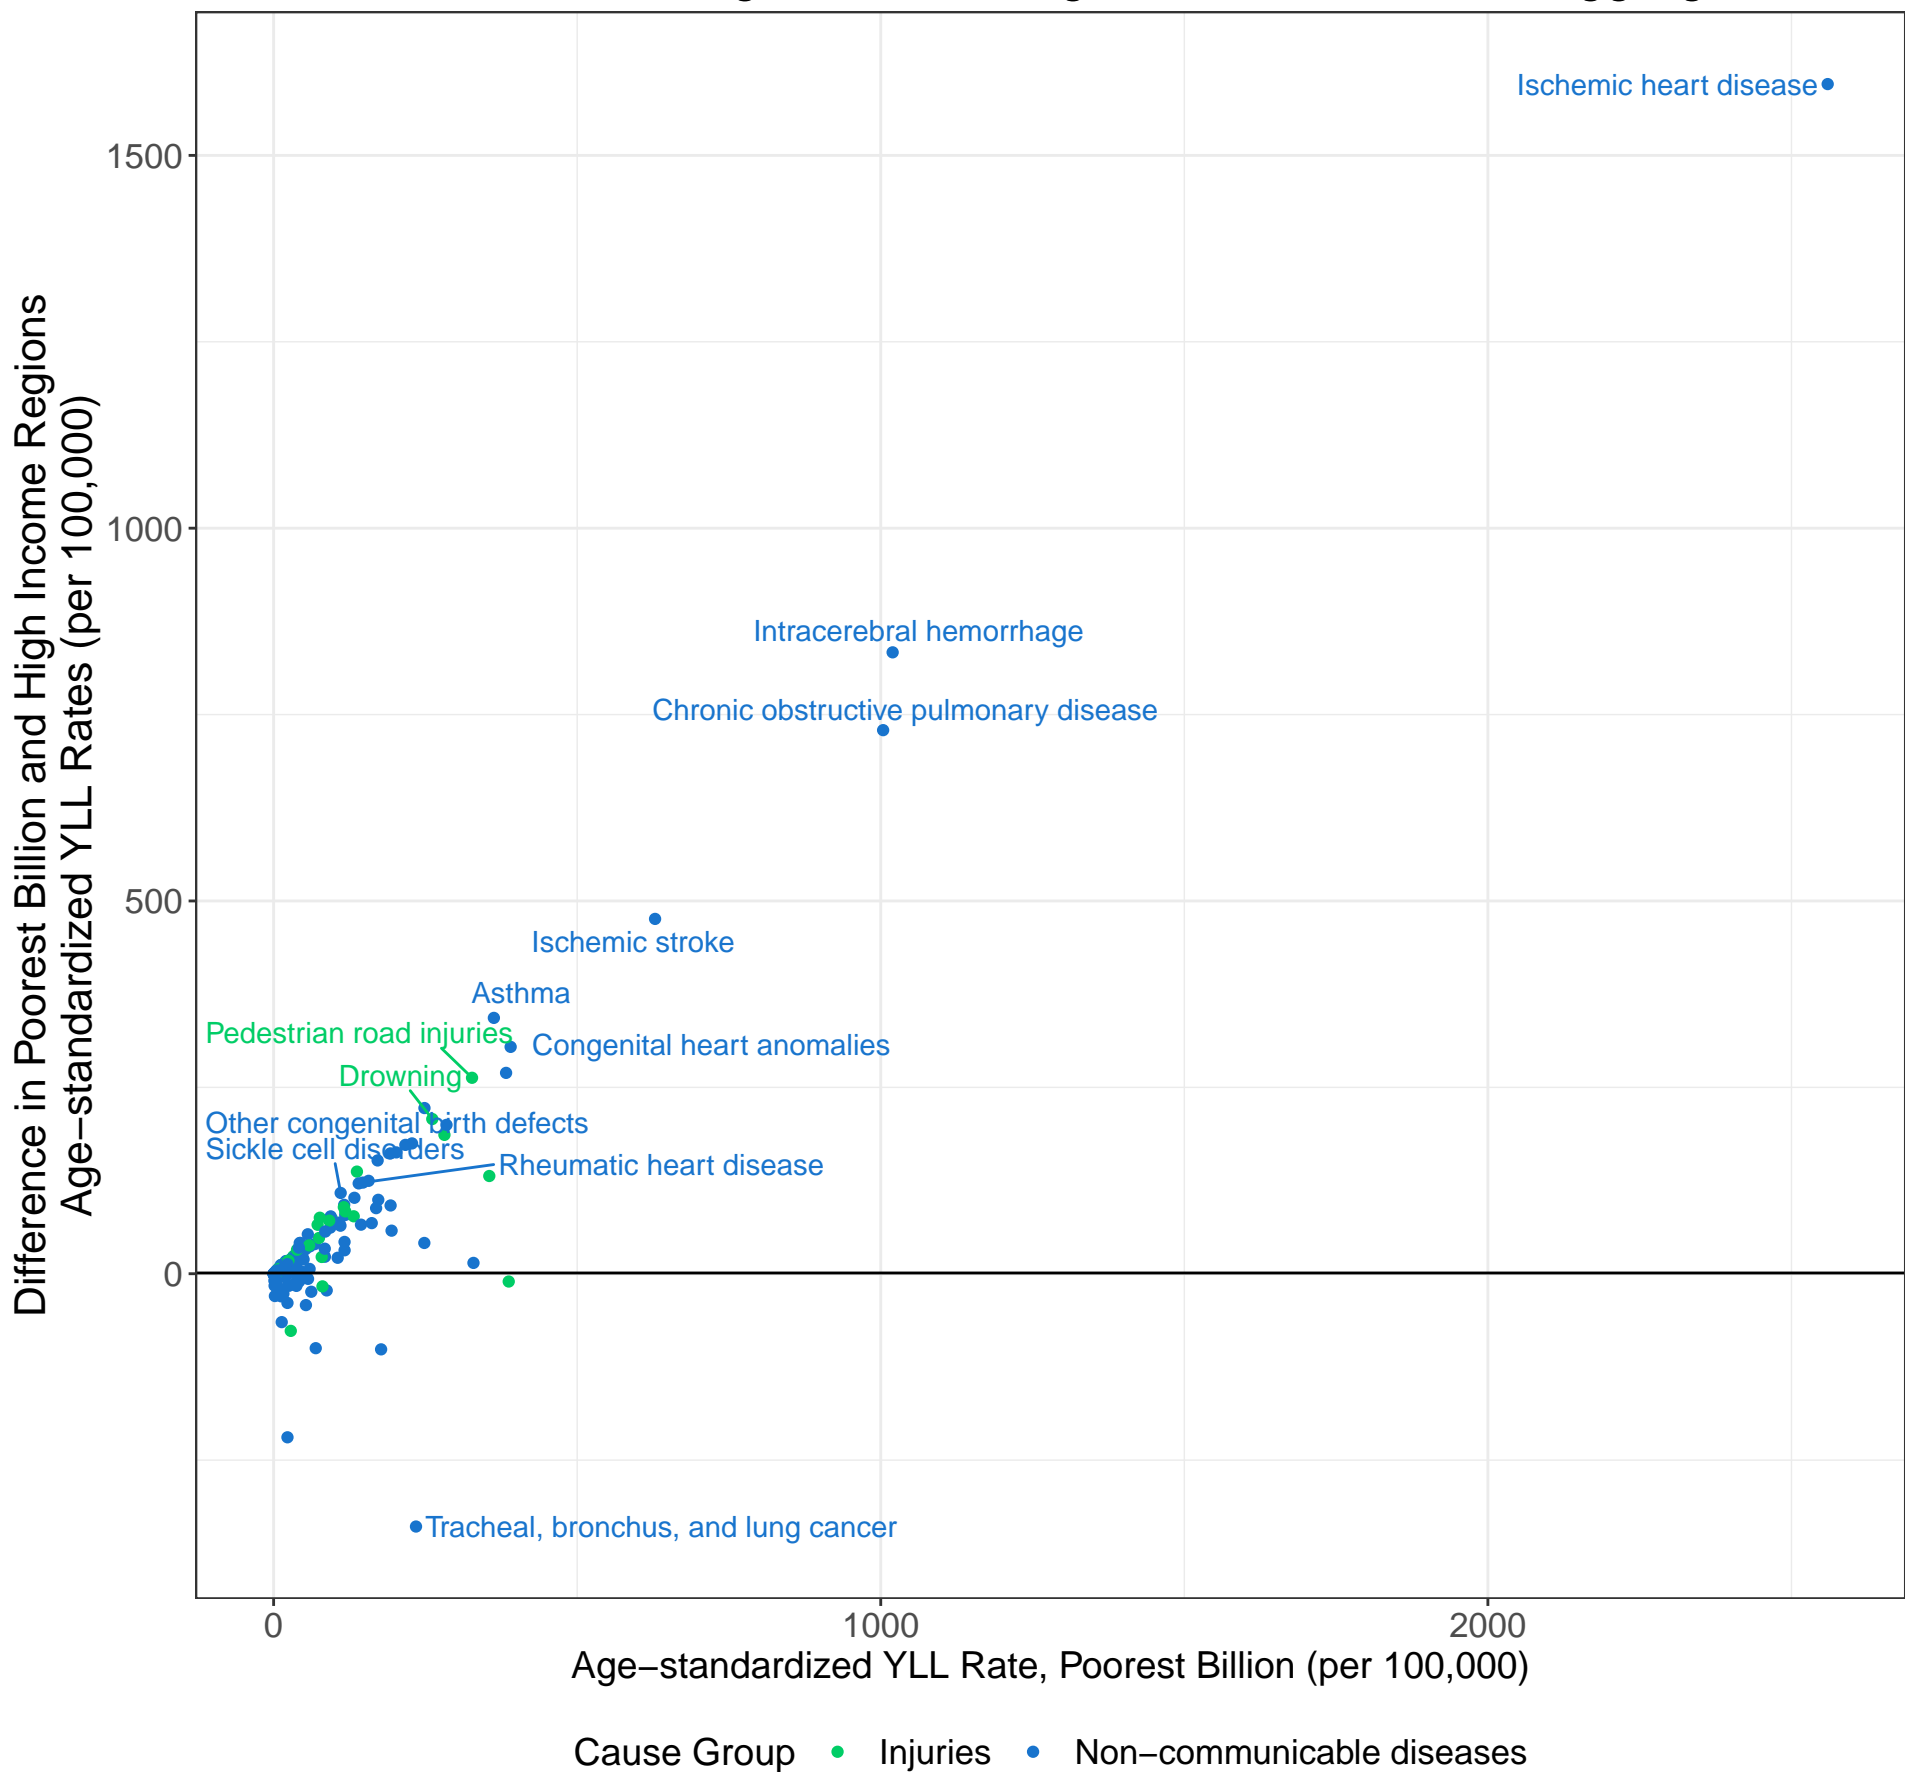



Appendix Figure 11g. Difference between Crude YLL Rates in Poorest Billion and High-income Regions, Country Aggregation

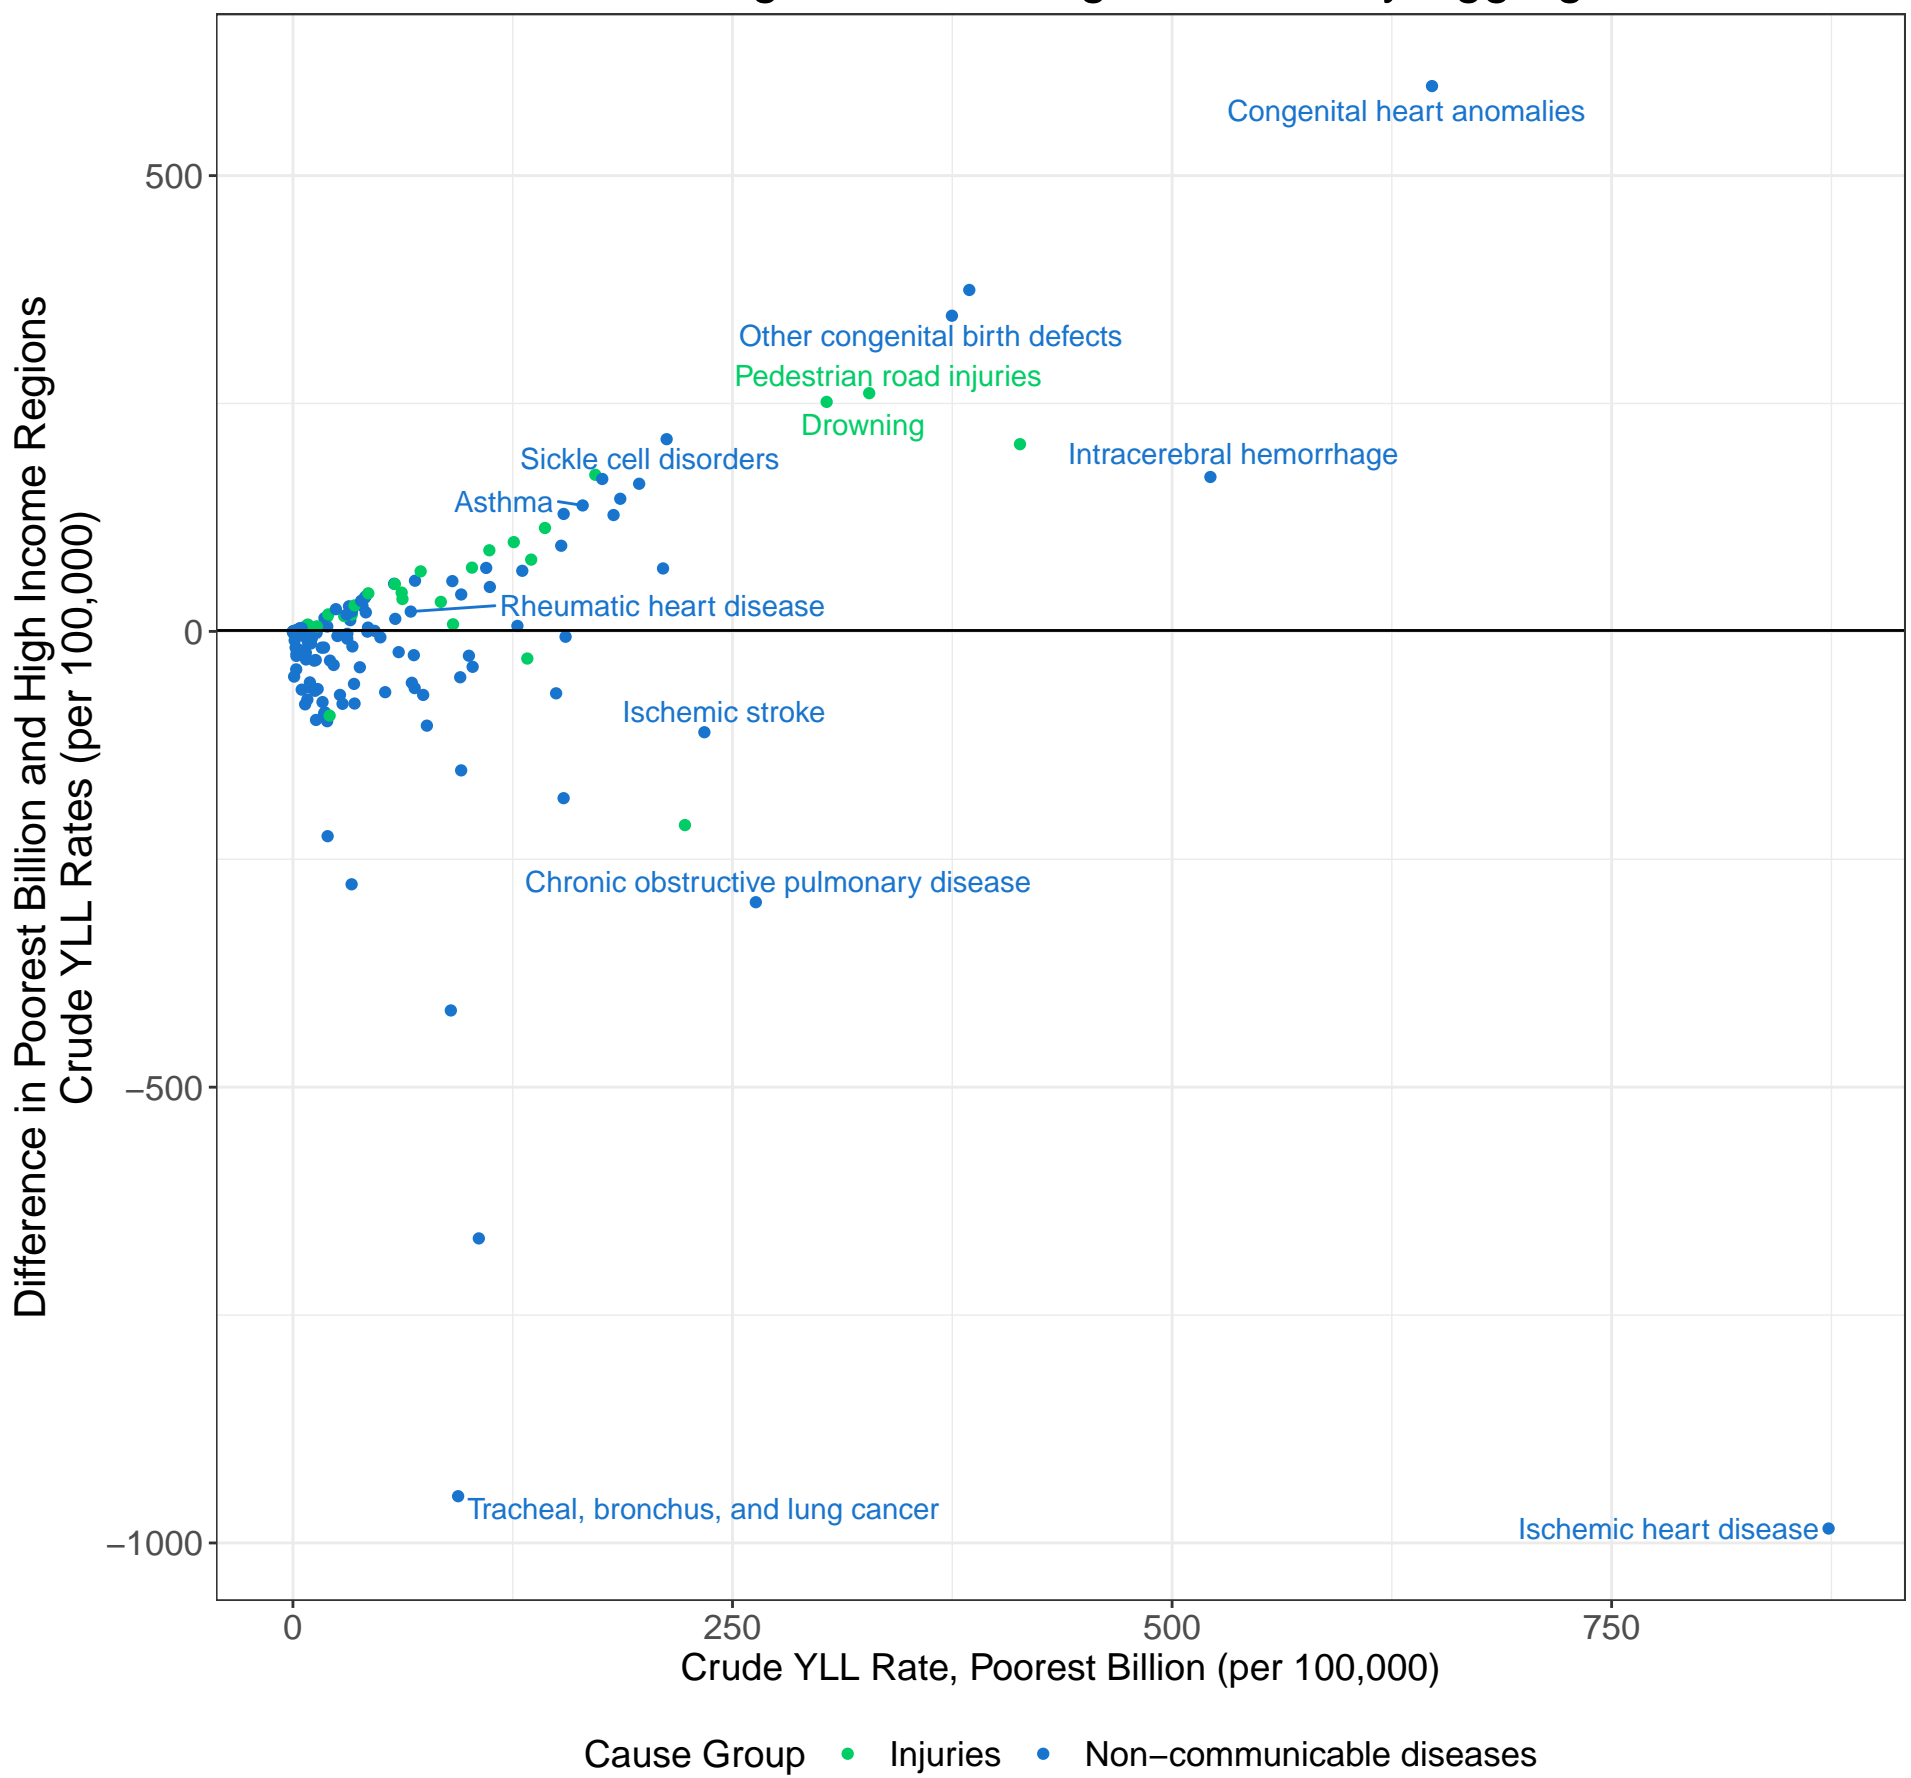

Appendix Figure 11h. Difference between Age-standardized YLL Rates in Poorest Billion and High-income Regions, Country Aggregation

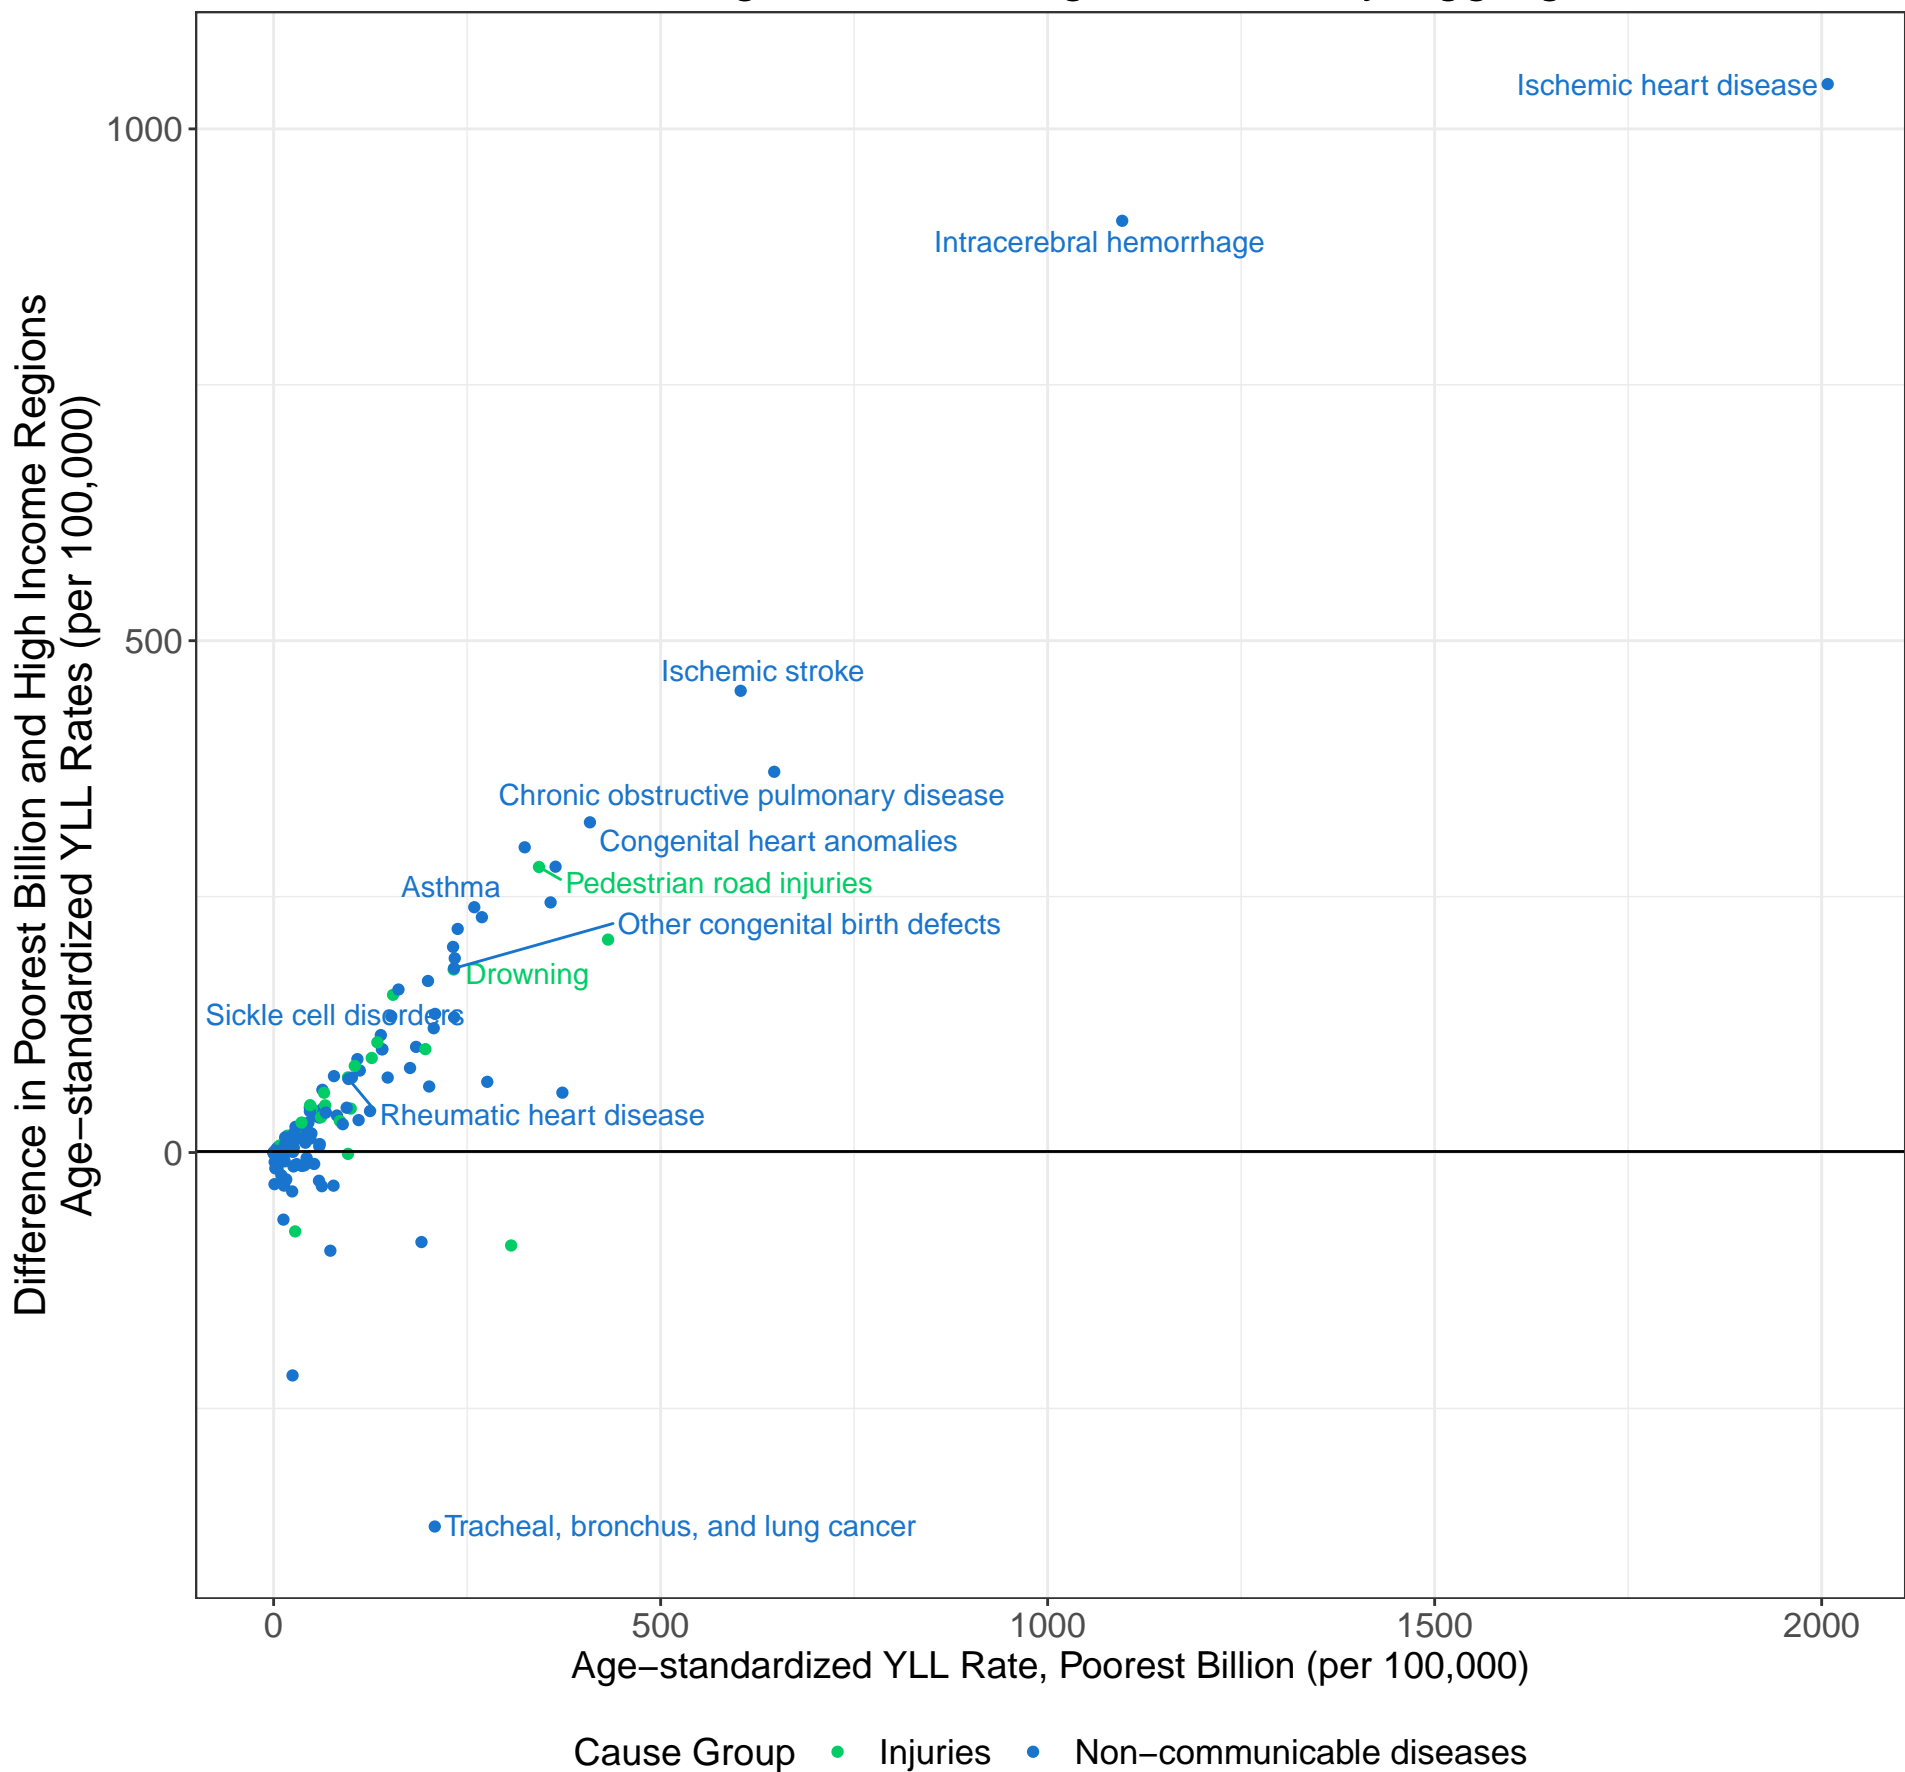

Appendix Figure 11i. Difference between Crude YLL Rates in Low-income and High-income Regions

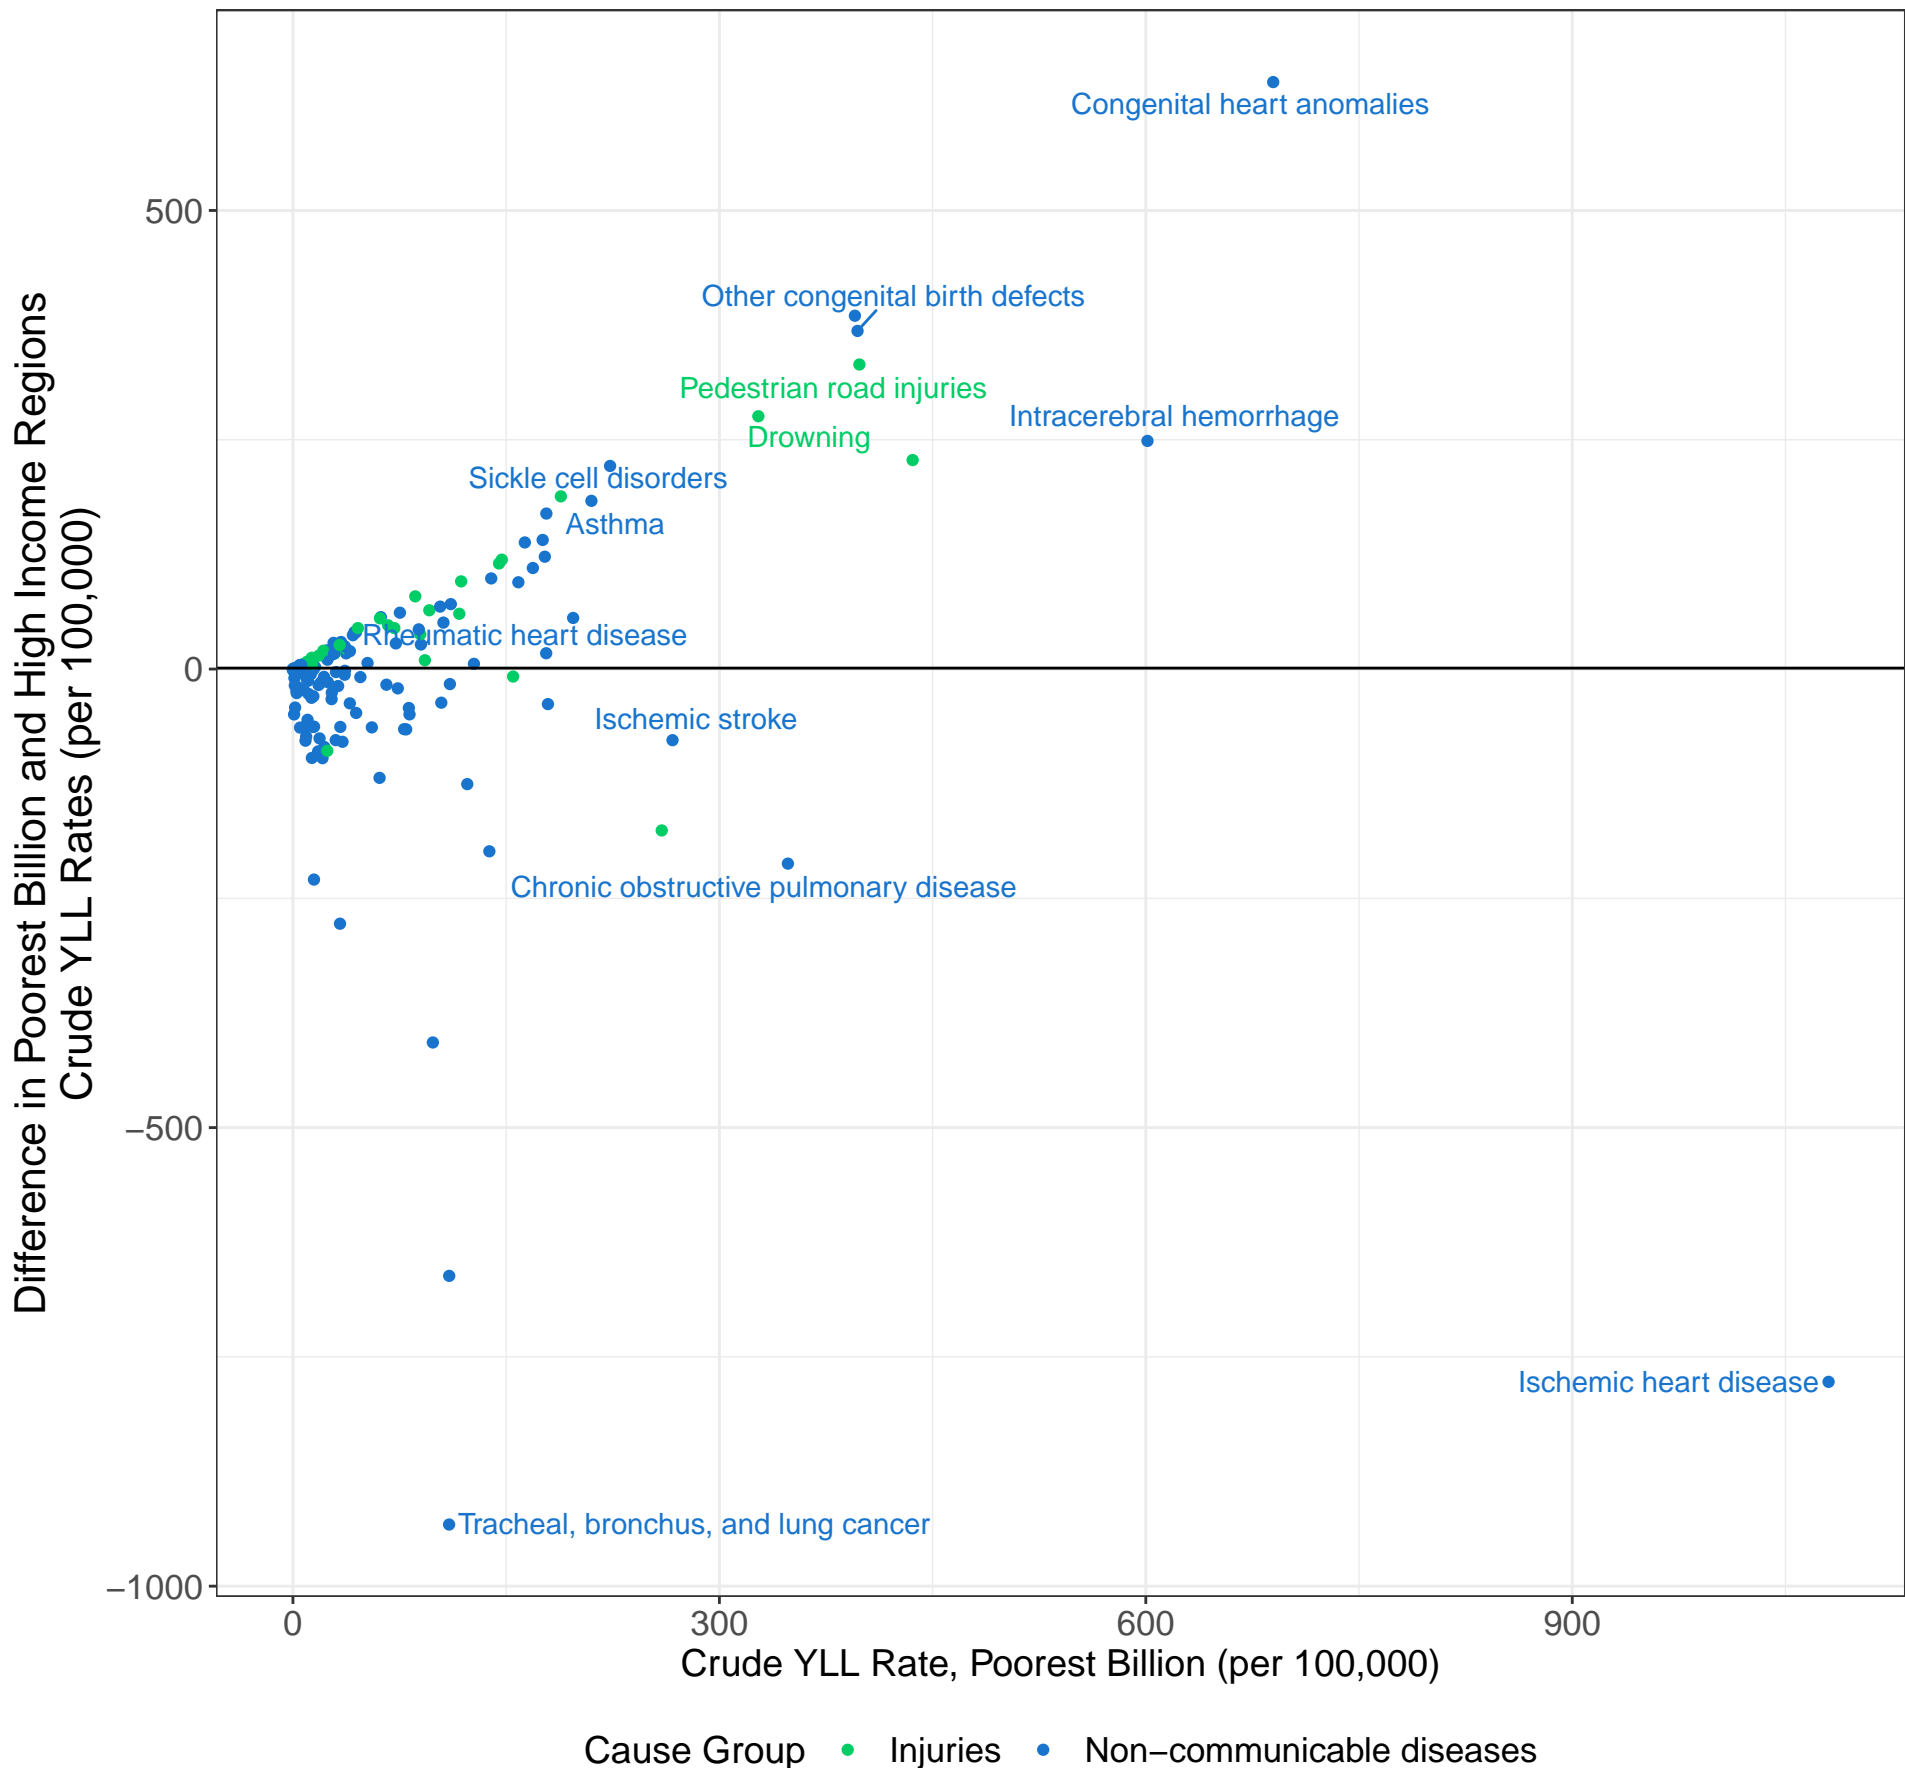

Appendix Figure 11j. Difference between Age-standardized YLL Rates in Low-income and High-income Regions

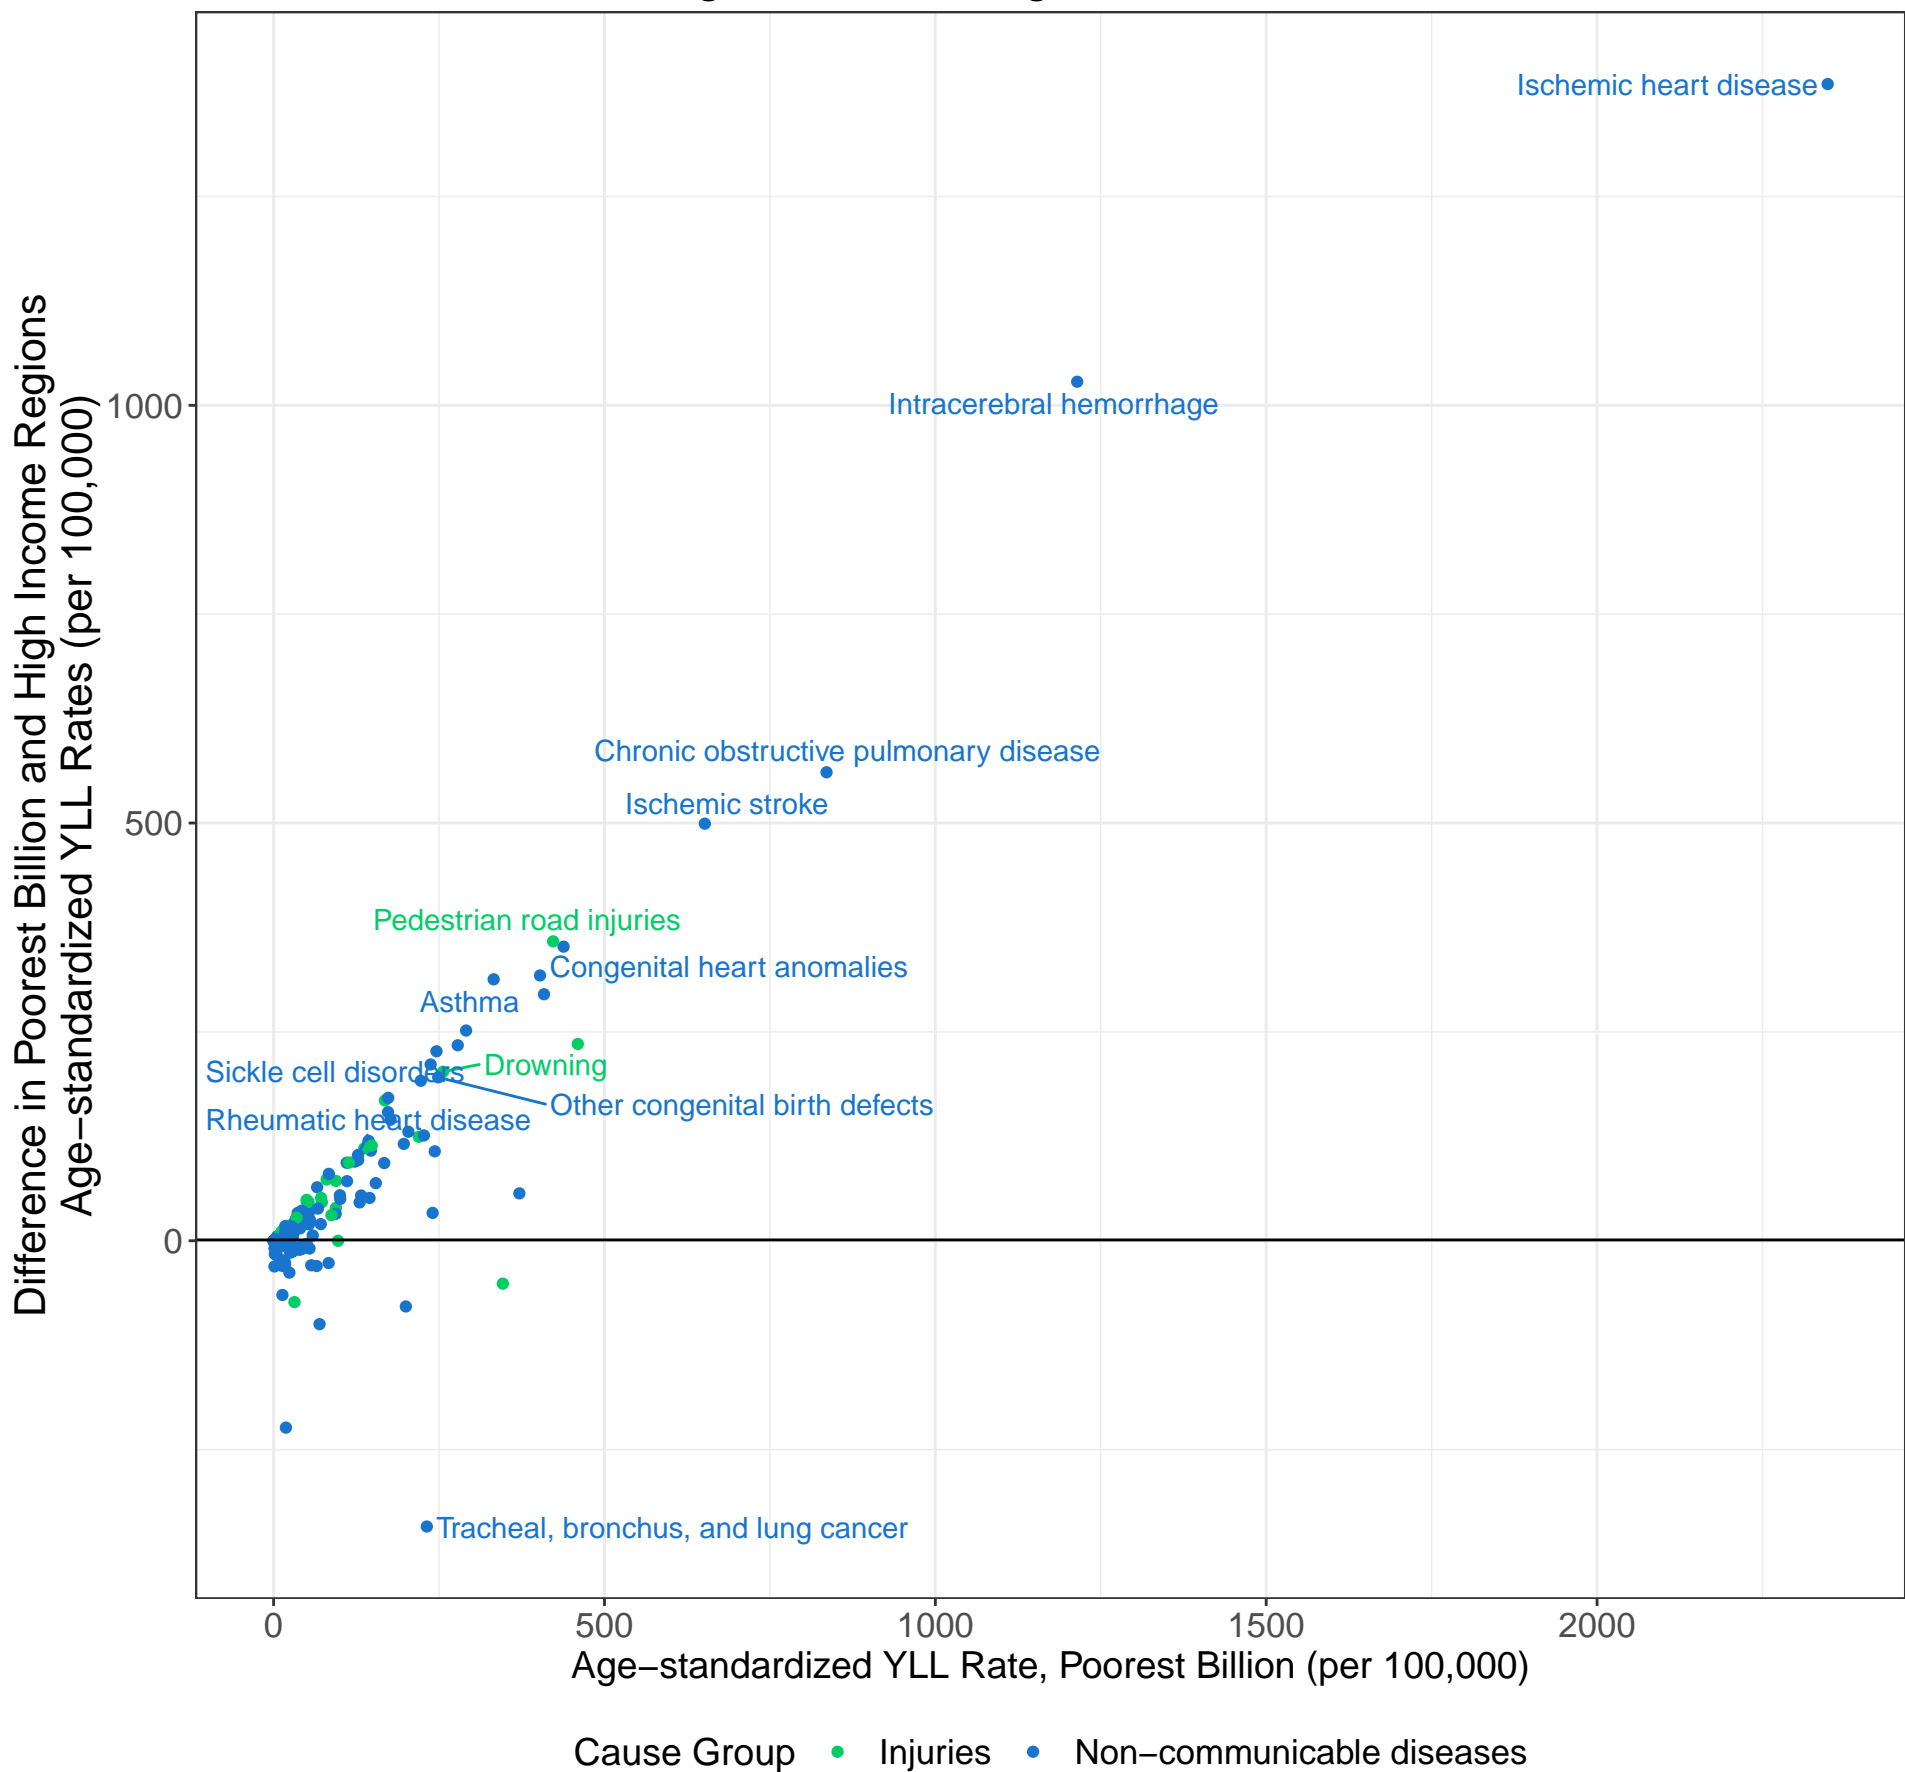

Appendix Figure 12a. Difference between Crude YLD Rates in Poorest Billion and High-income Regions, Selective Ecological Approach

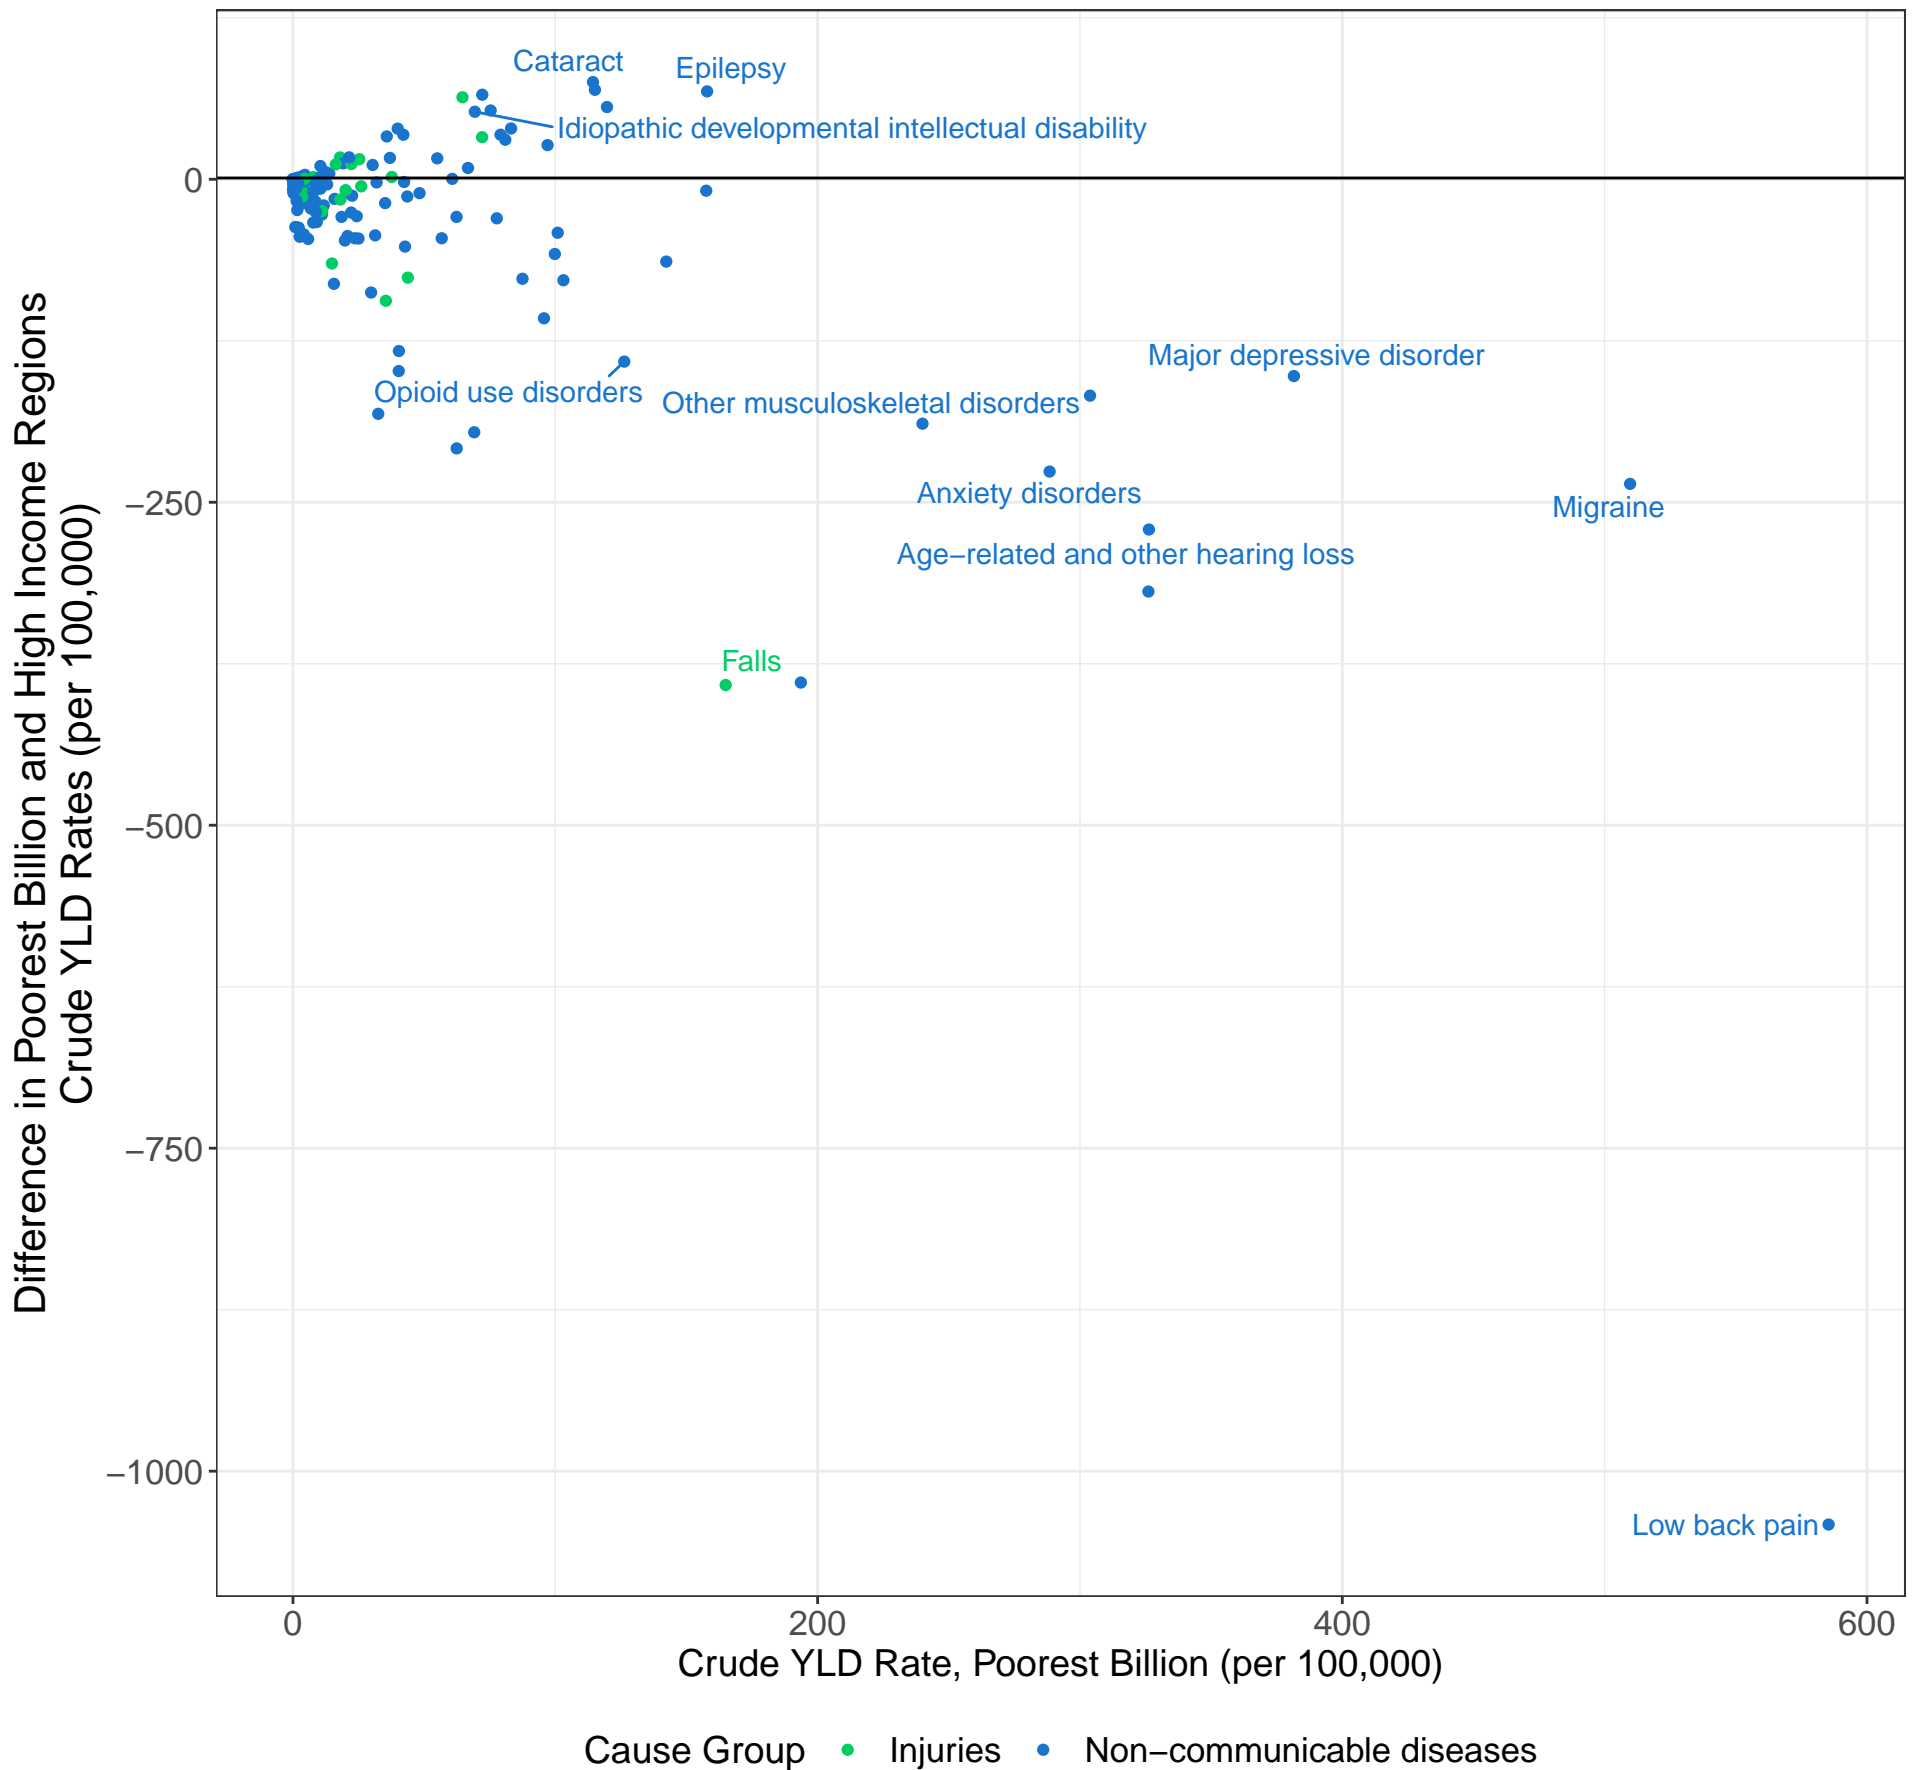

Appendix Figure 12b. Difference between Age-standardized YLD Rates in Poorest Billion and High-income Regions, Selective Ecological Approach

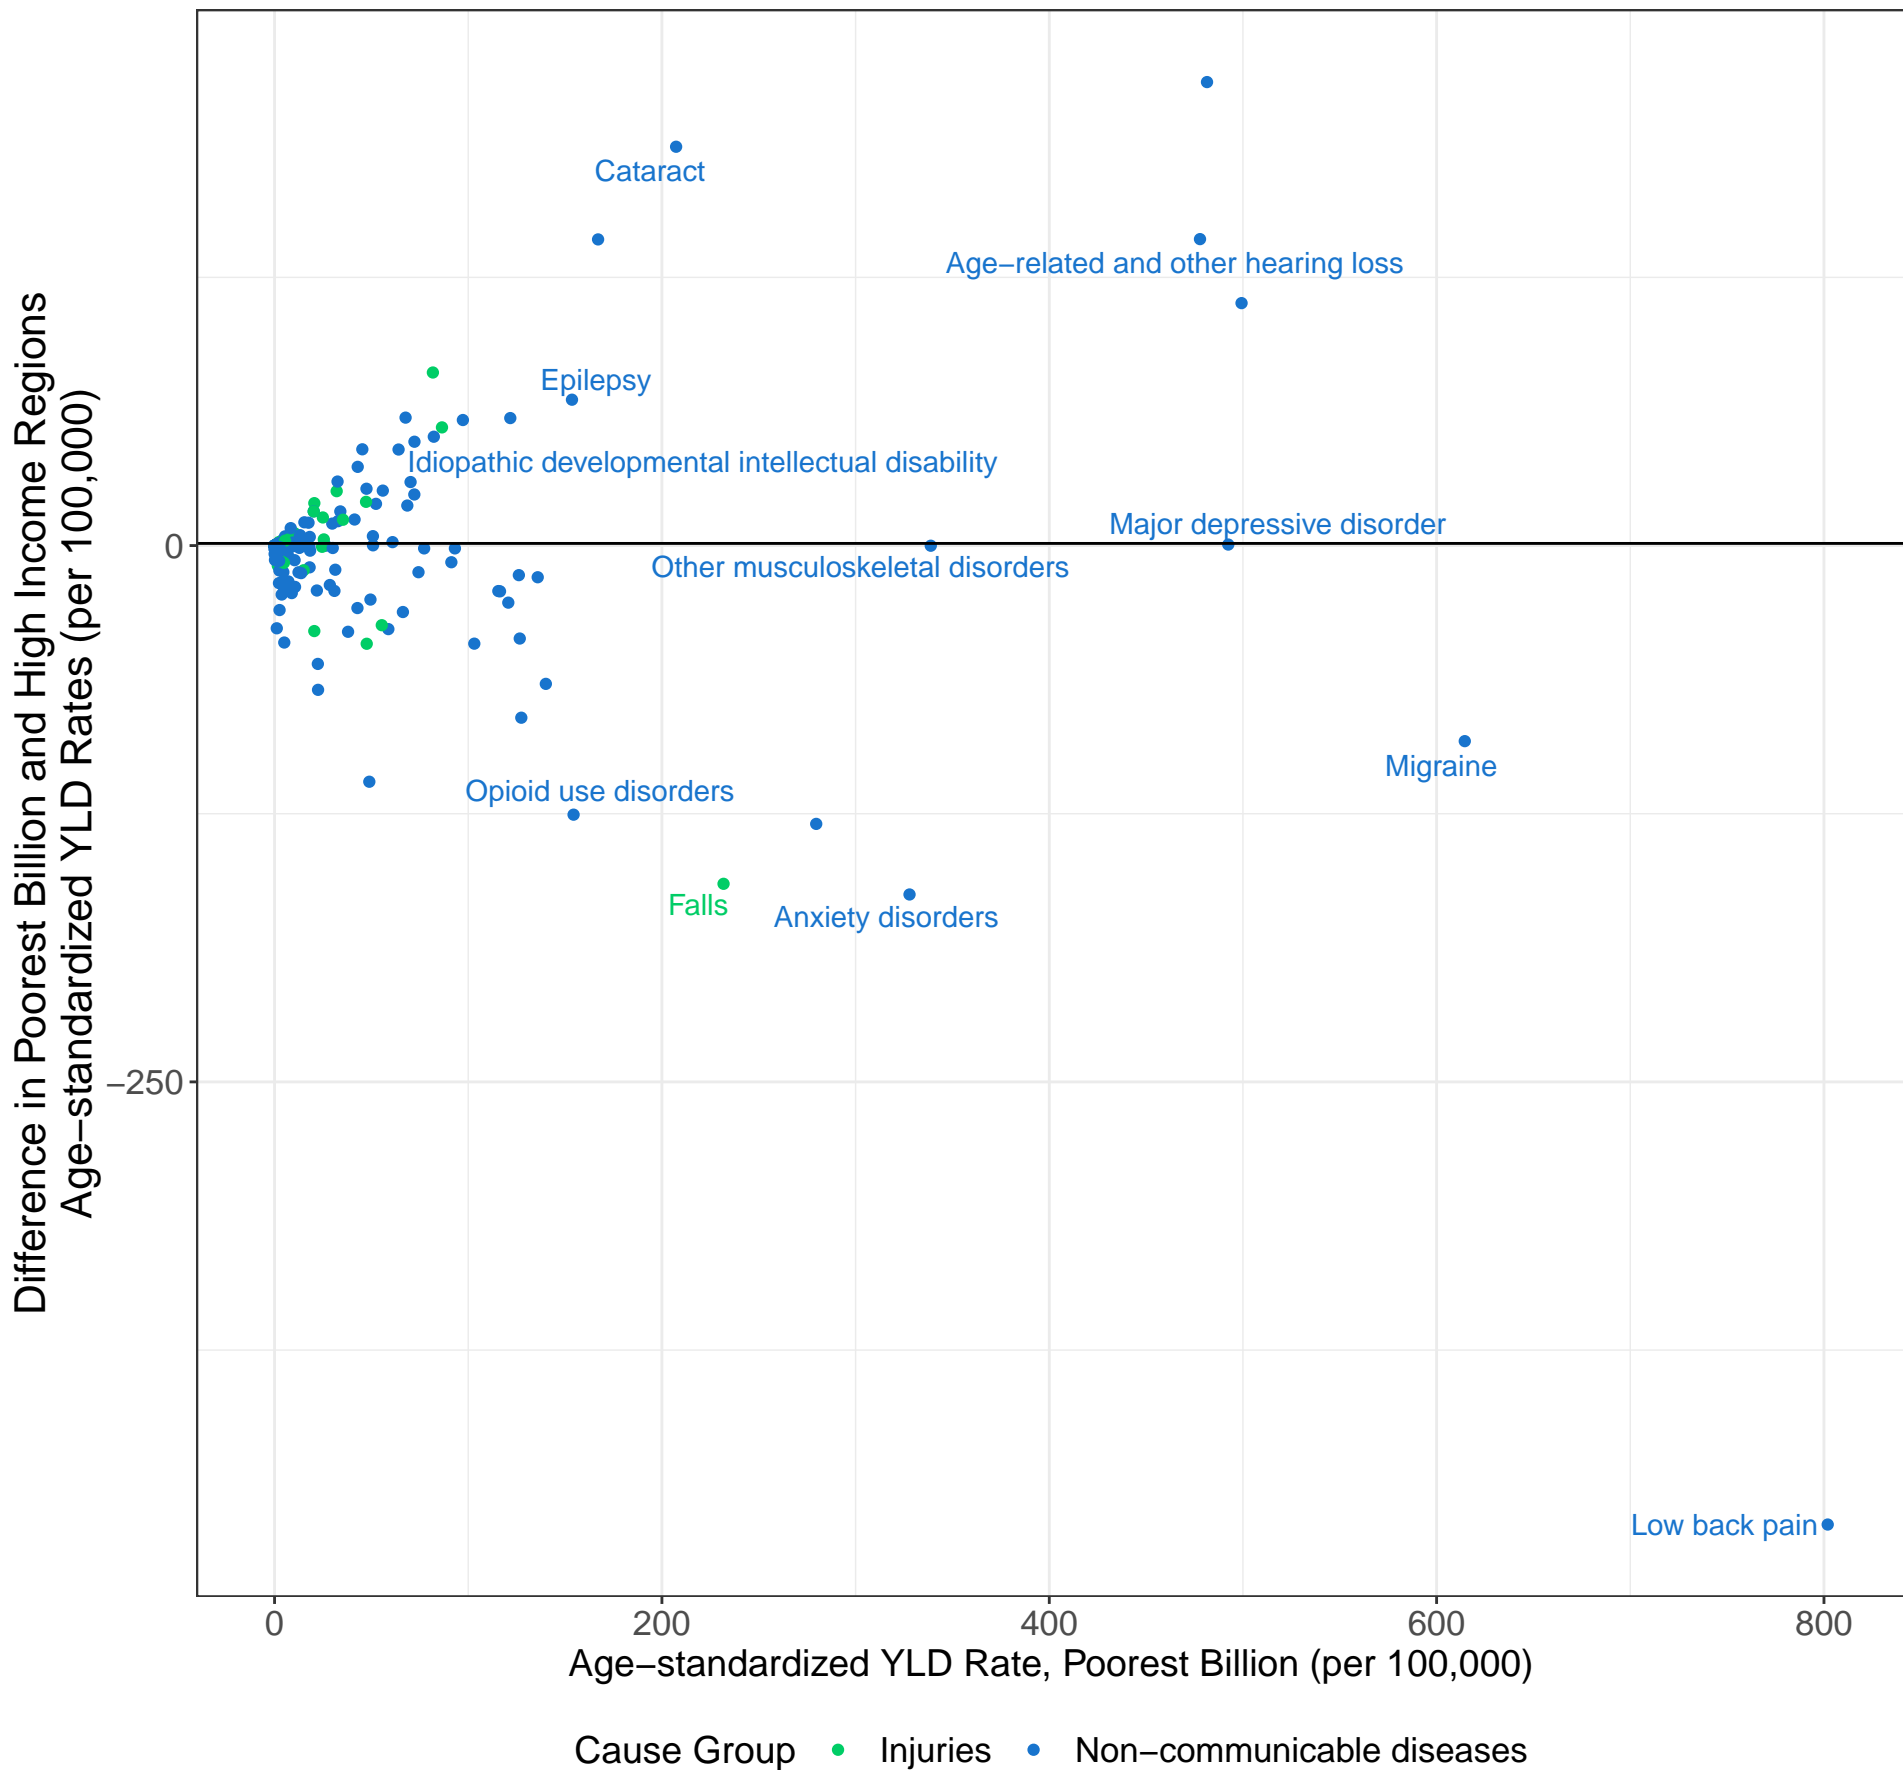

Appendix Figure 12c. Difference between Crude YLD Rates in Poorest Billion and High-income Regions, Full Ecological Approach

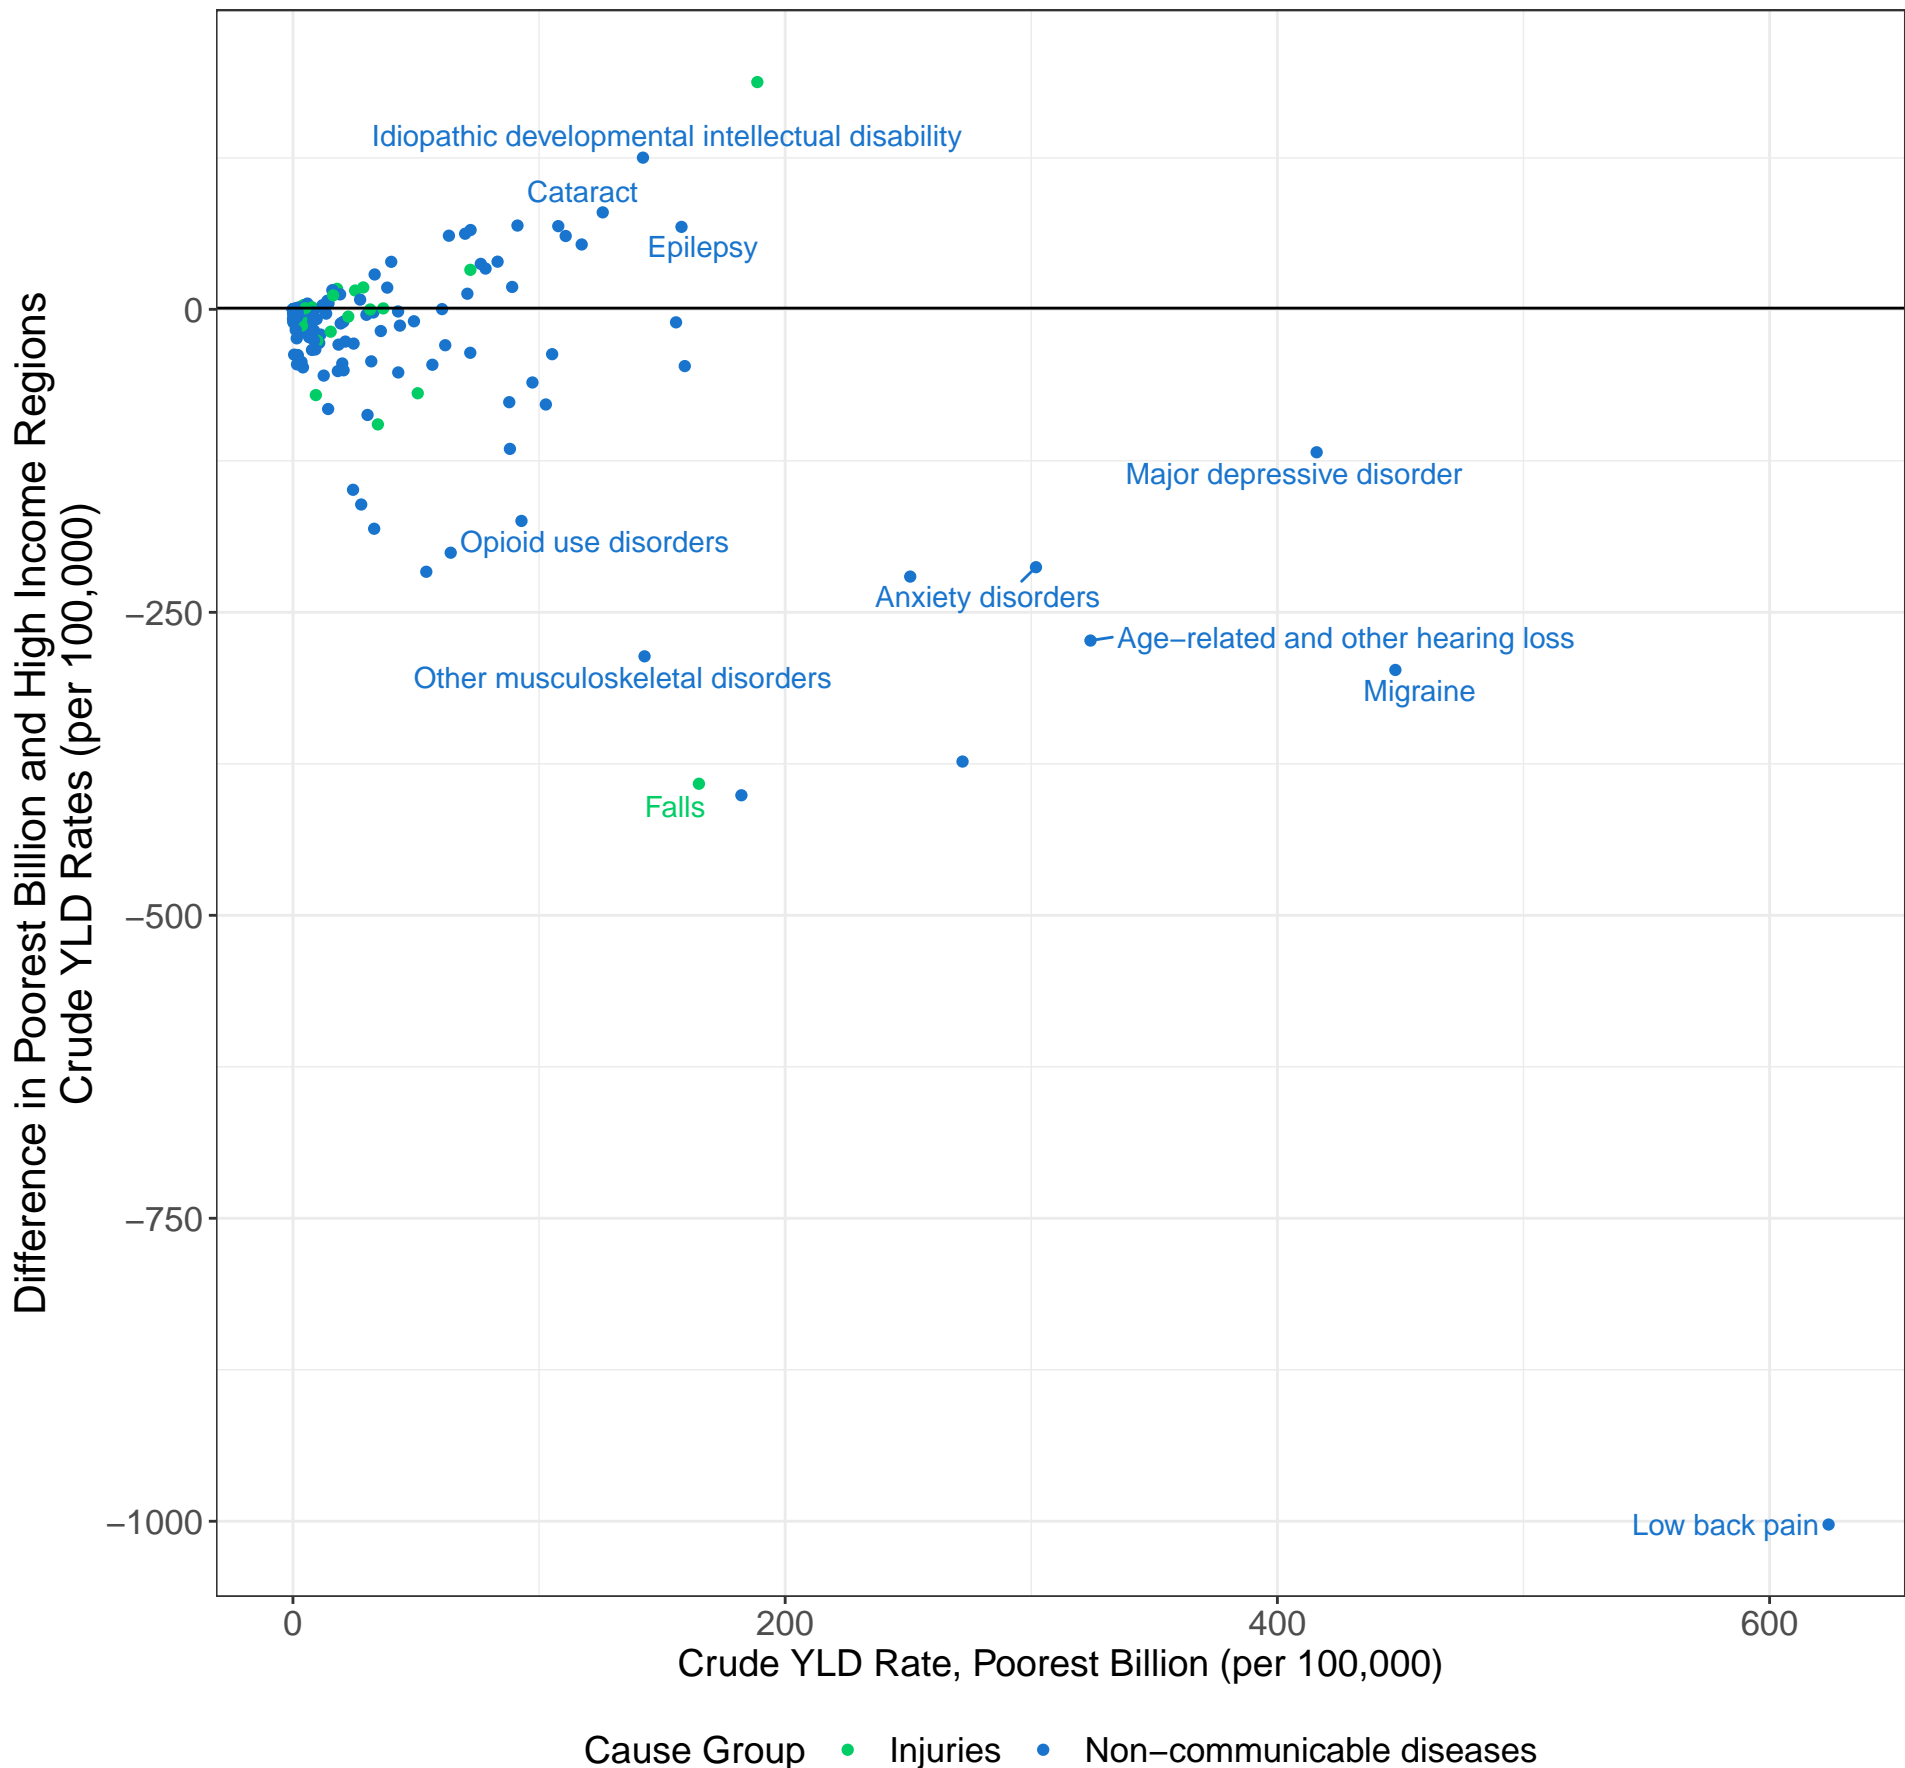

Appendix Figure 12d. Difference between Age-standardized YLD Rates in Poorest Billion and High-income Regions, Full Ecological Approach

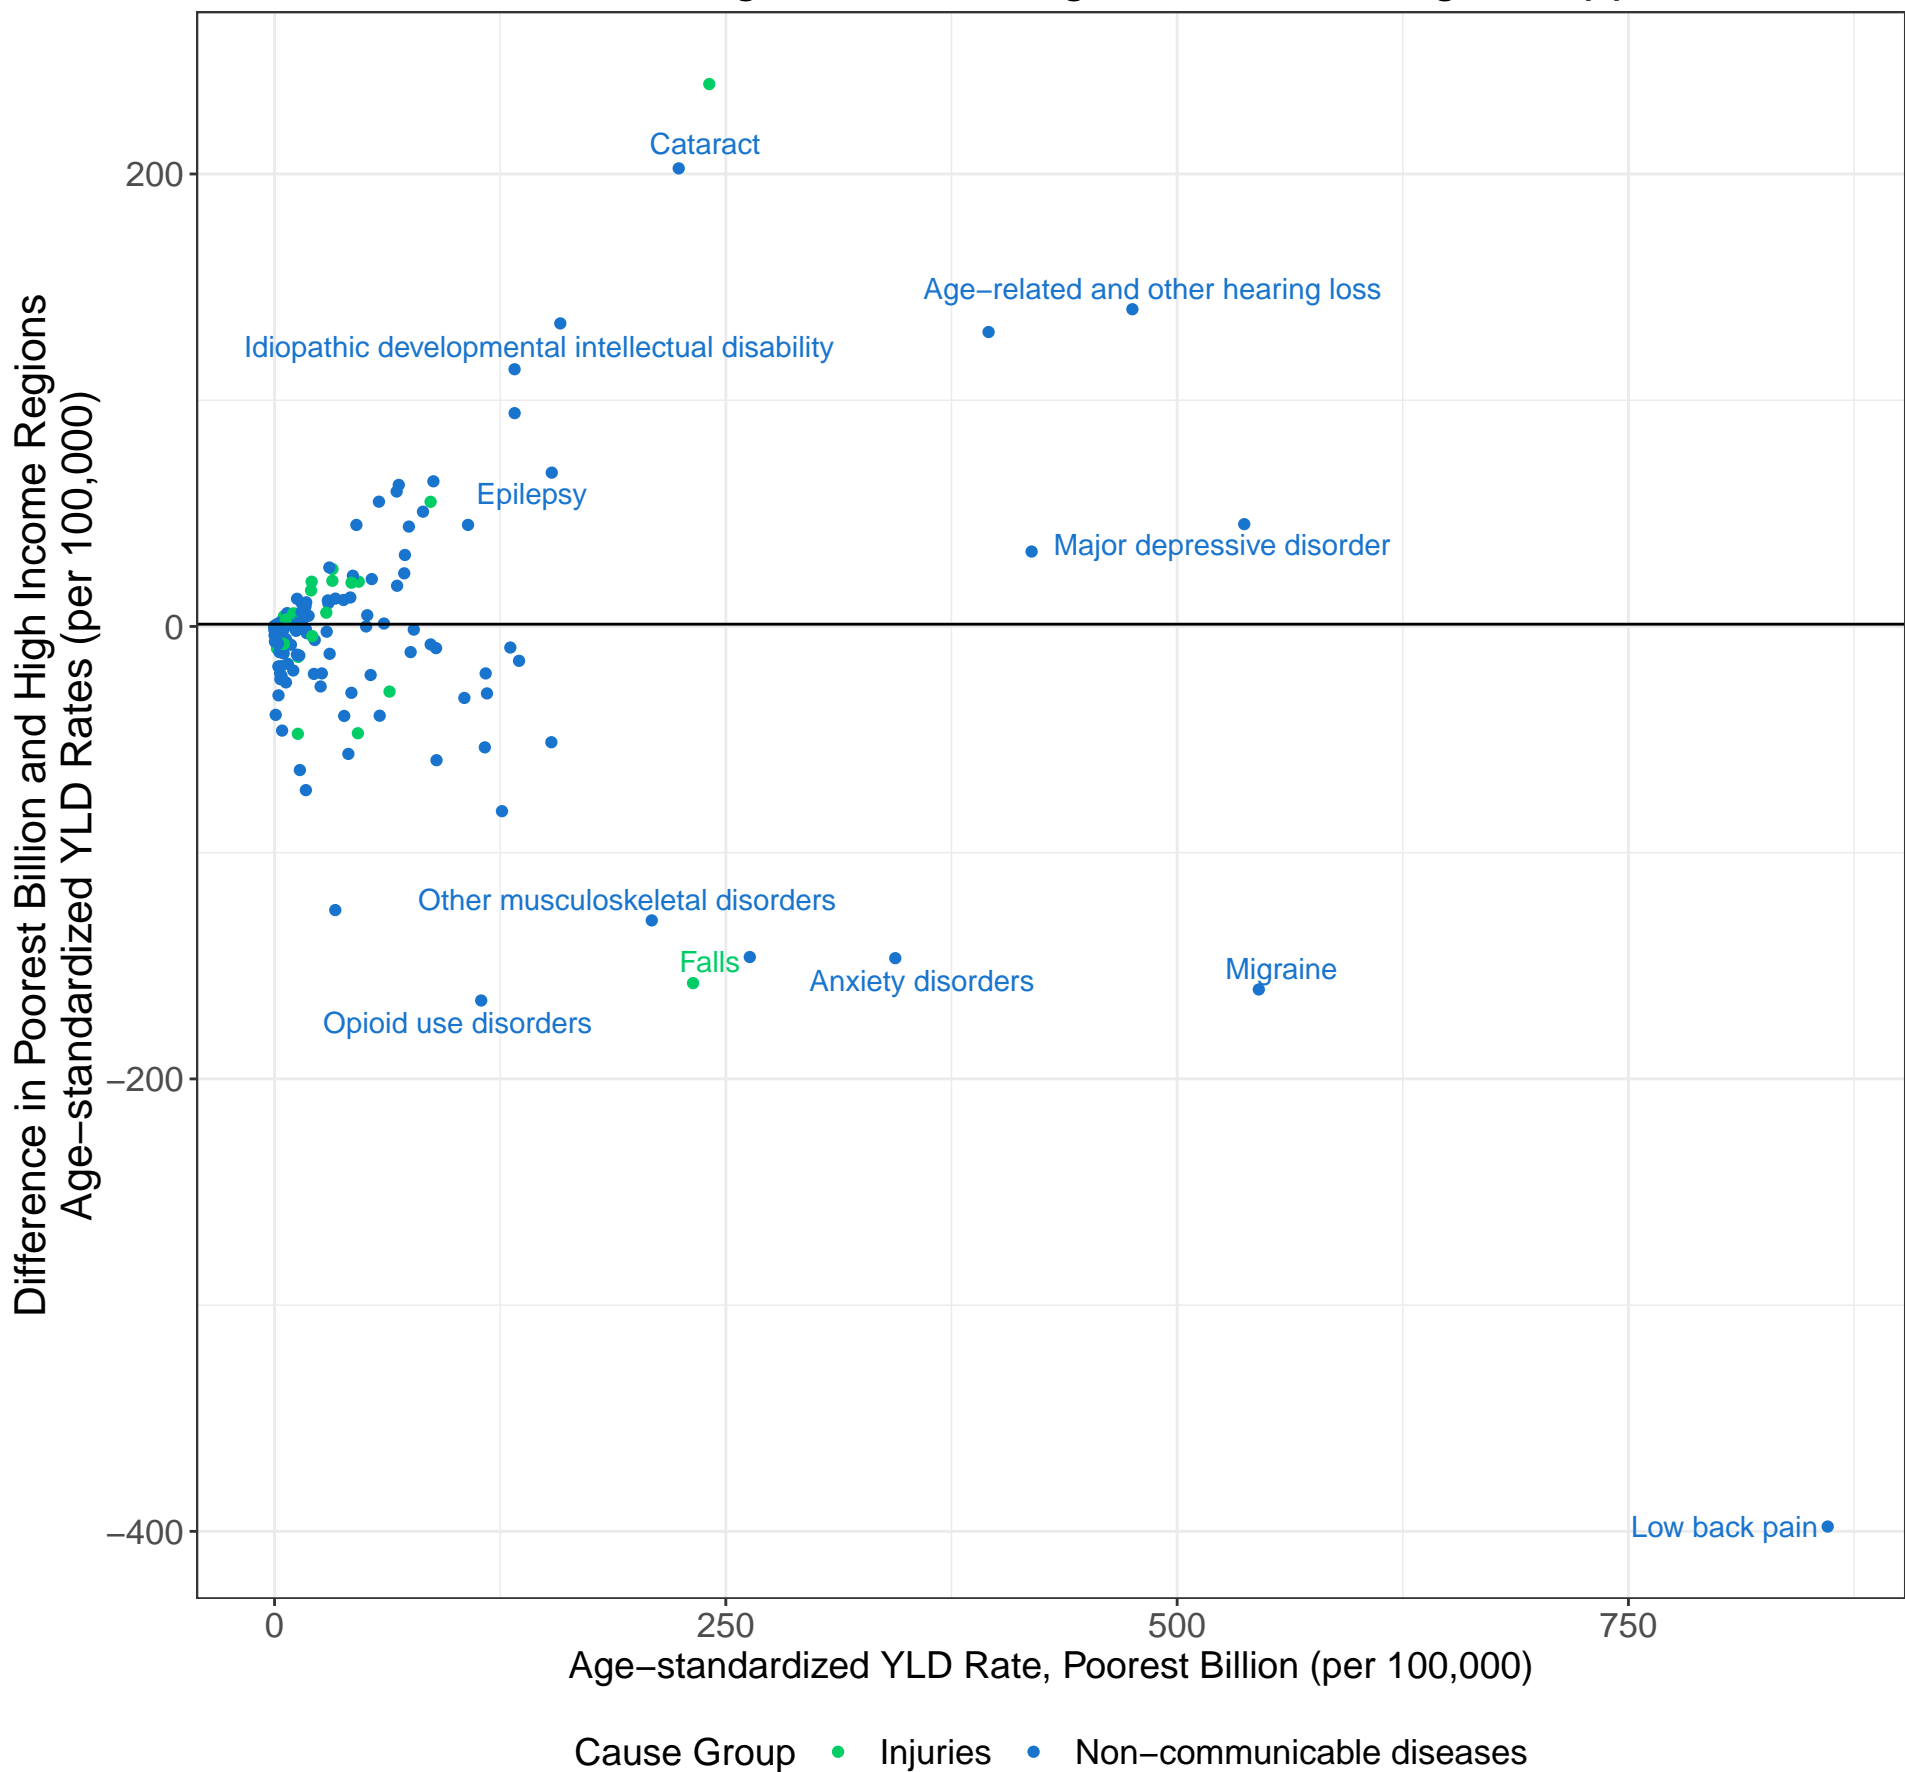



Appendix Figure 12e. Difference between Crude YLD Rates in Poorest Billion and High-income Regions, Poorest Billion Aggregation

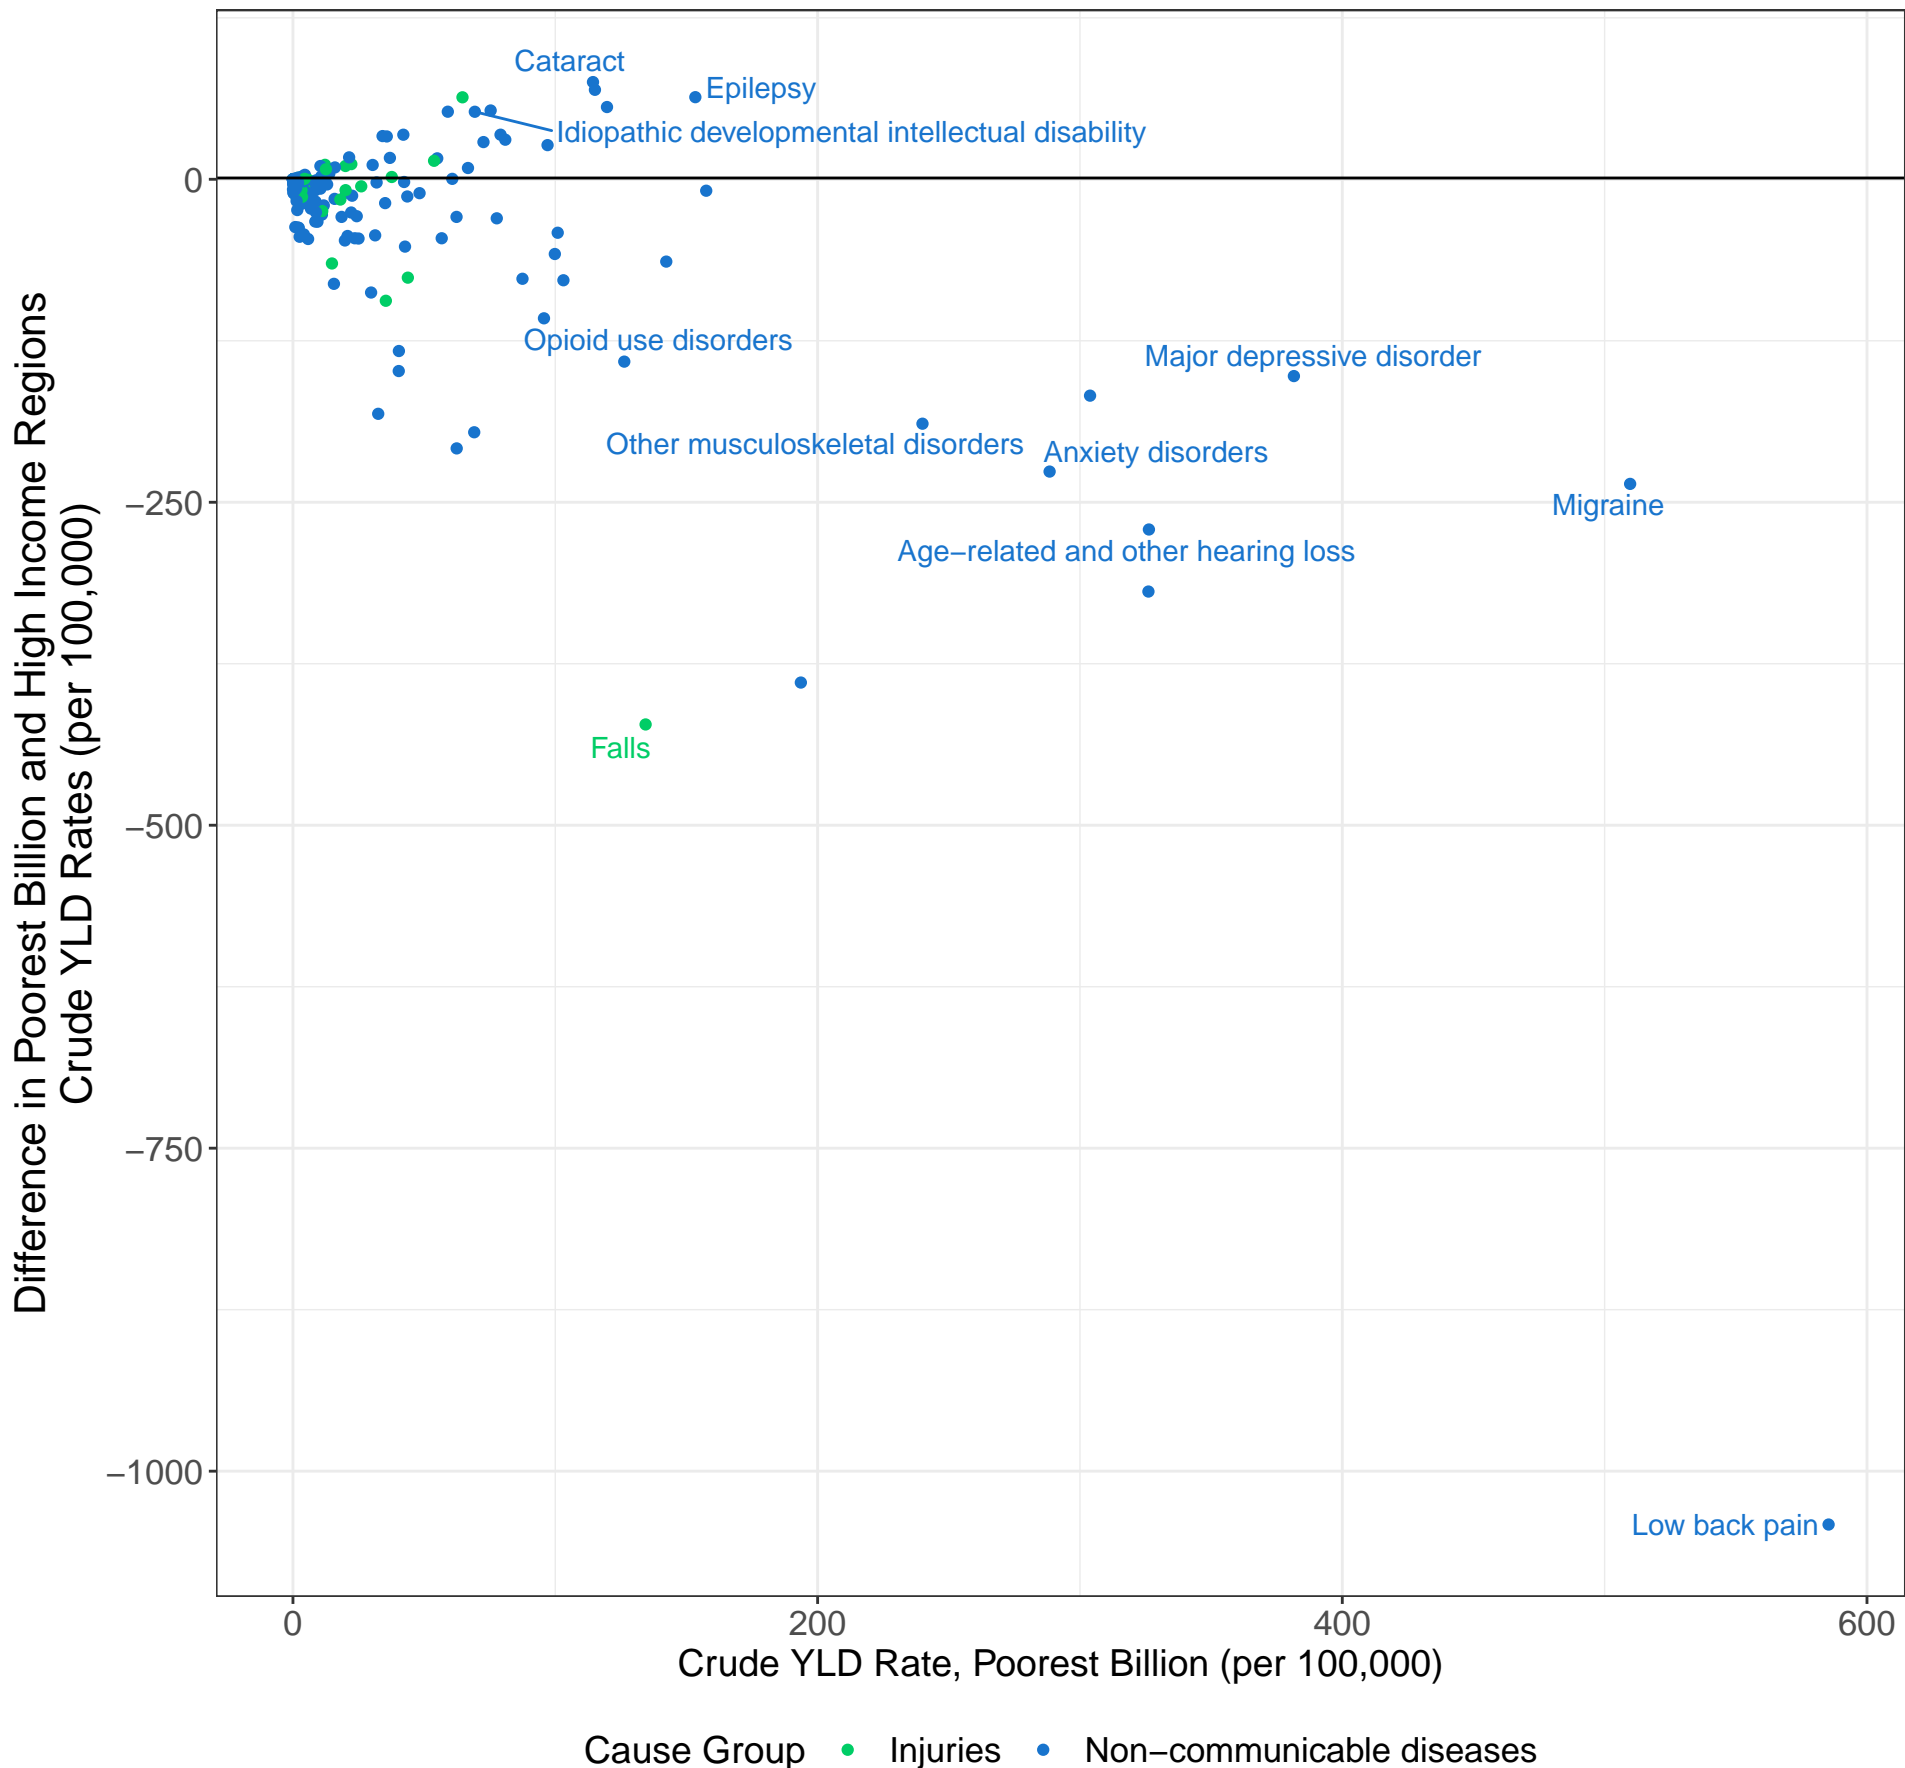

Appendix Figure 12f. Difference between Age-standardized YLD Rates in Poorest Billion and High-income Regions, Poorest Billion Aggregation

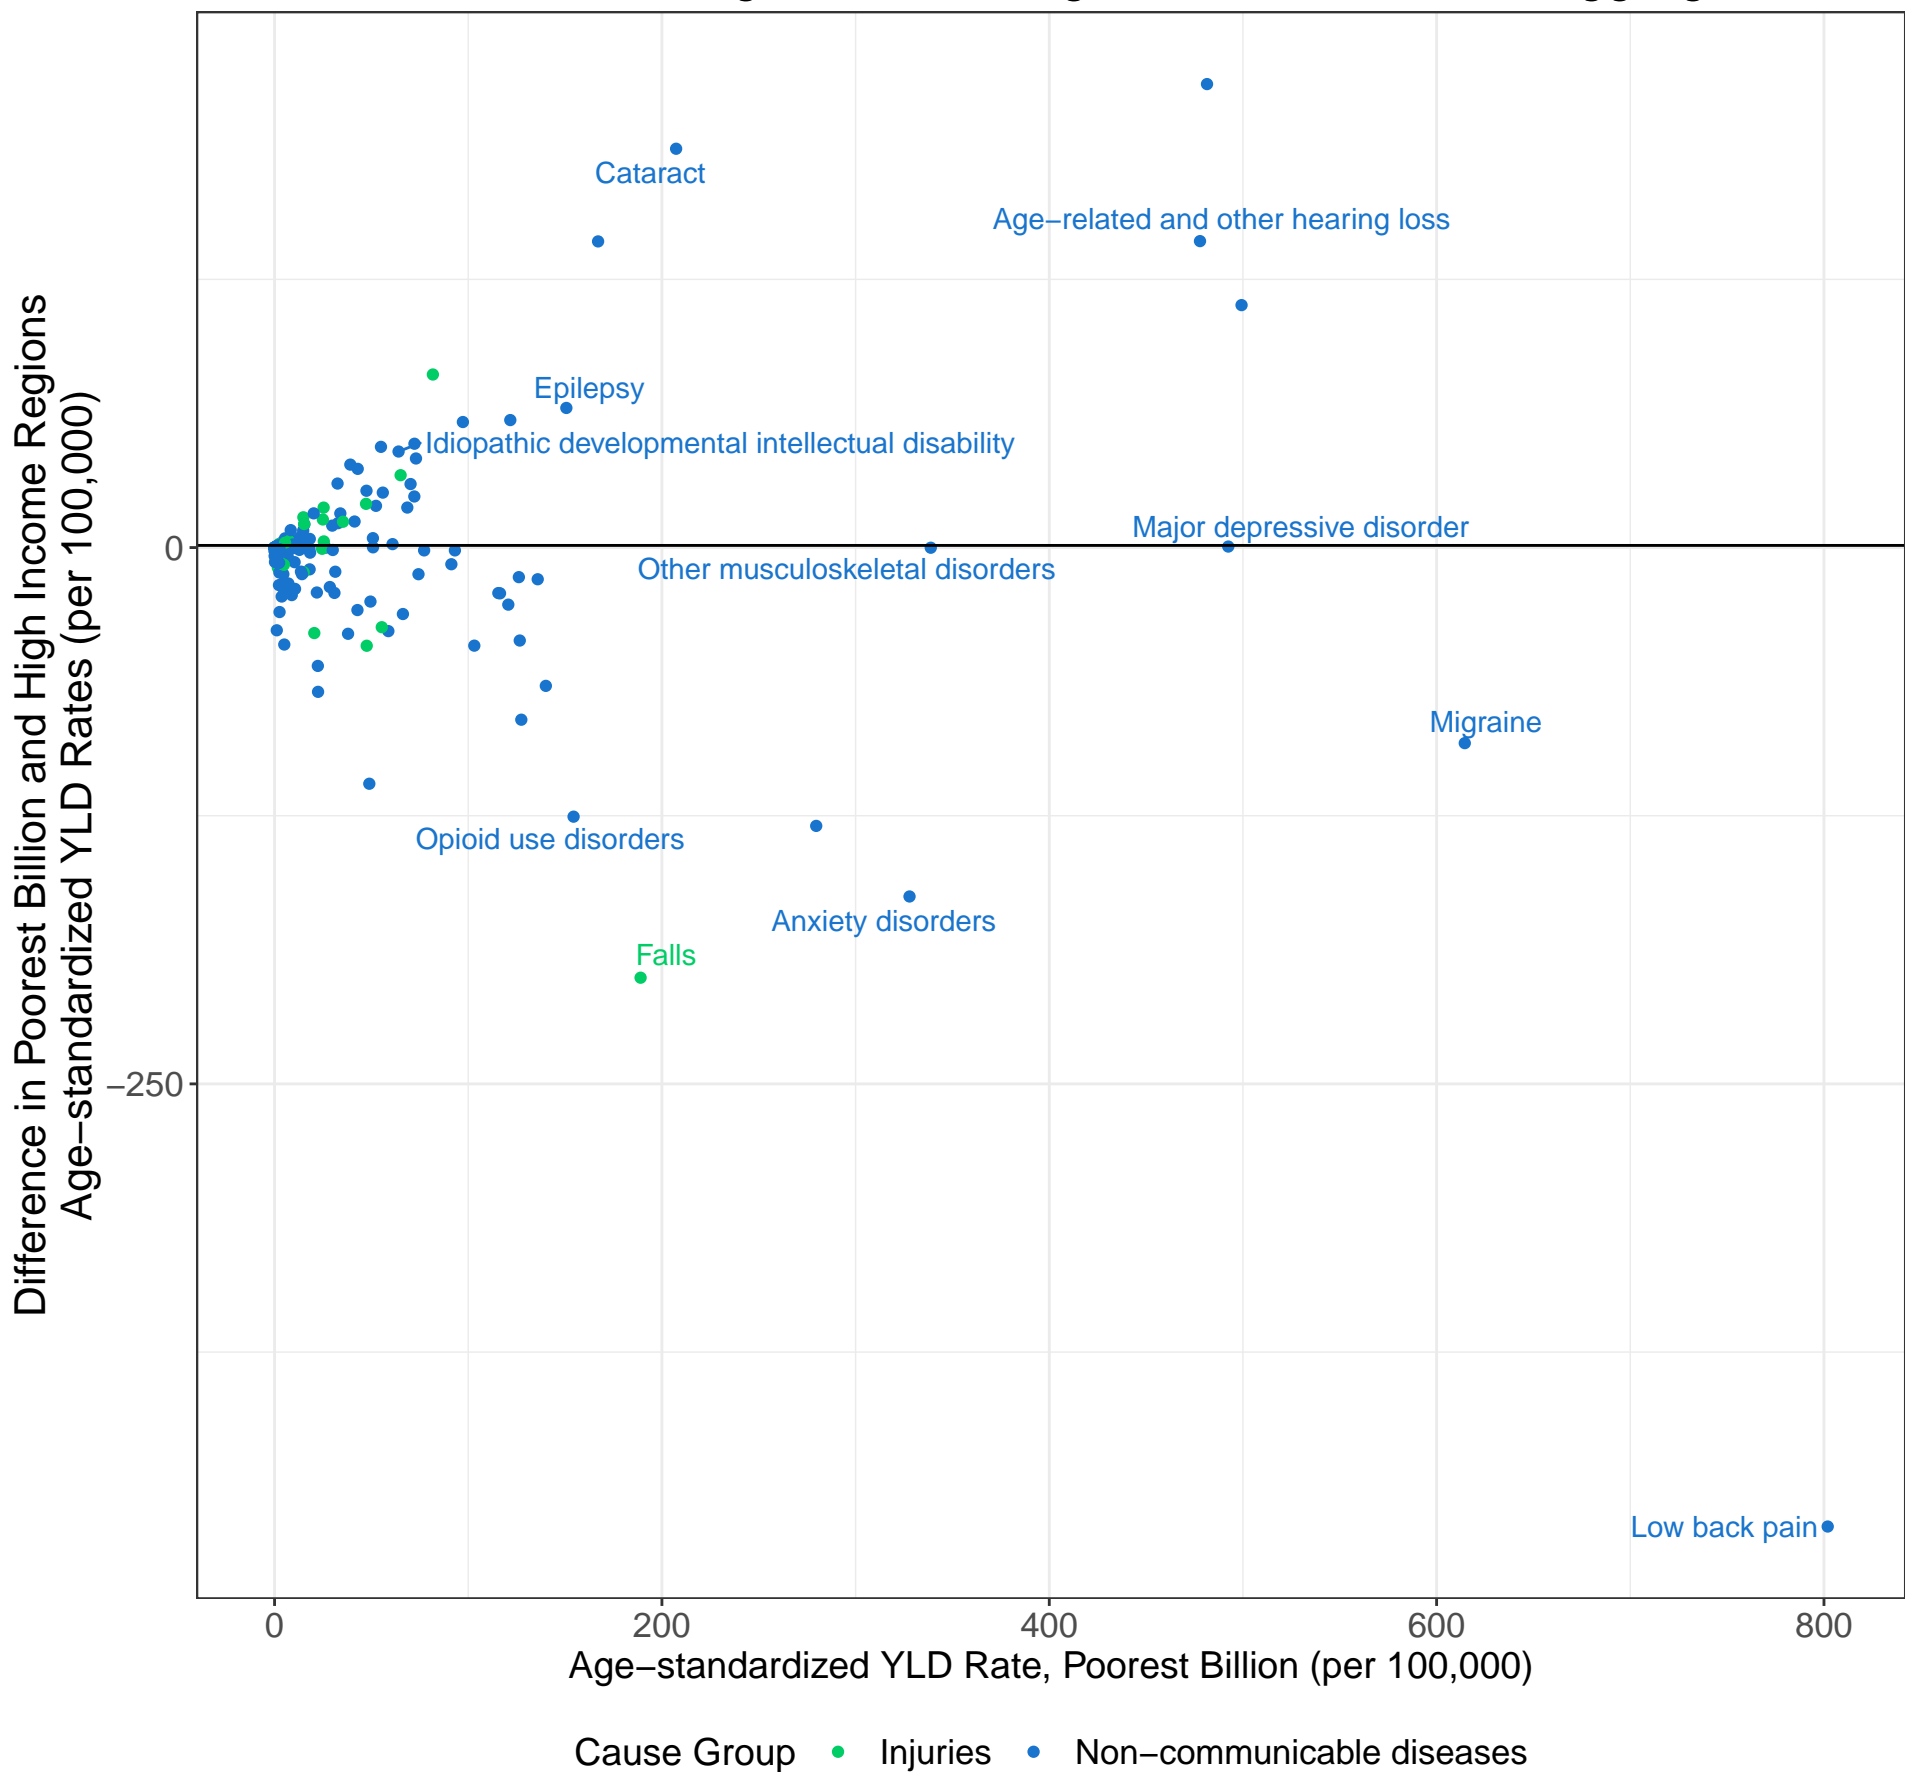

Appendix Figure 12g. Difference between Crude YLD Rates in Poorest Billion and High-income Regions, Country Aggregation

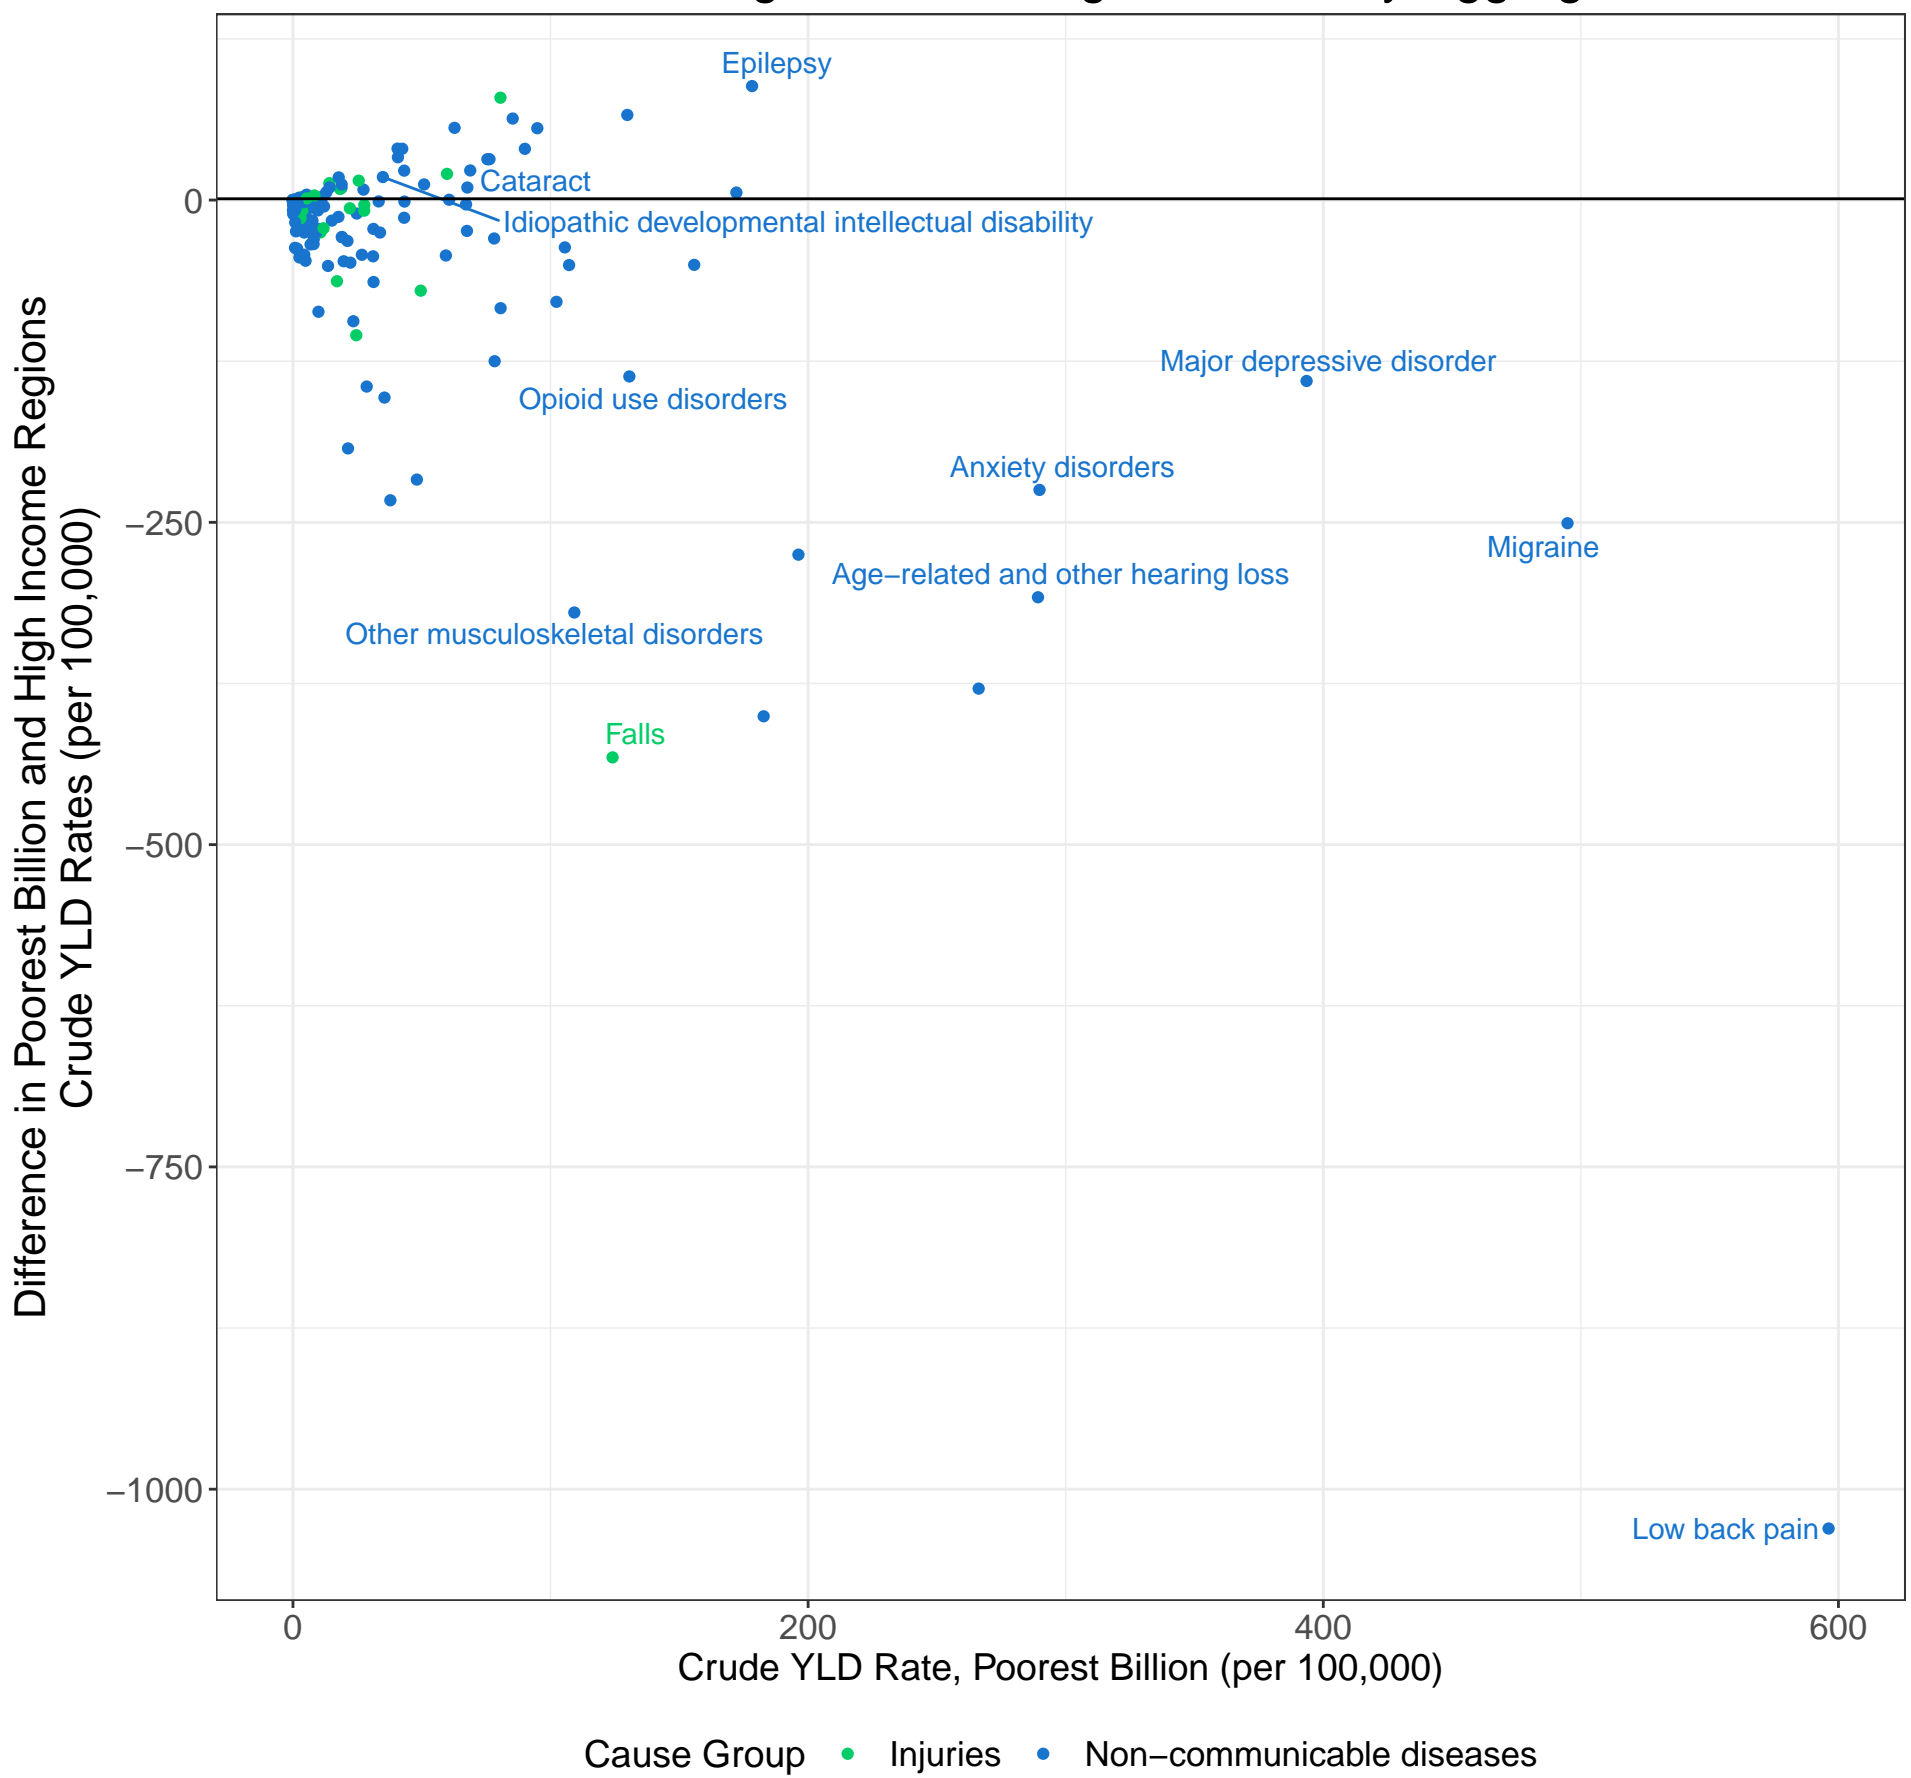

Appendix Figure 12h. Difference between Age-standardized YLD Rates in Poorest Billion and High-income Regions, Country Aggregation

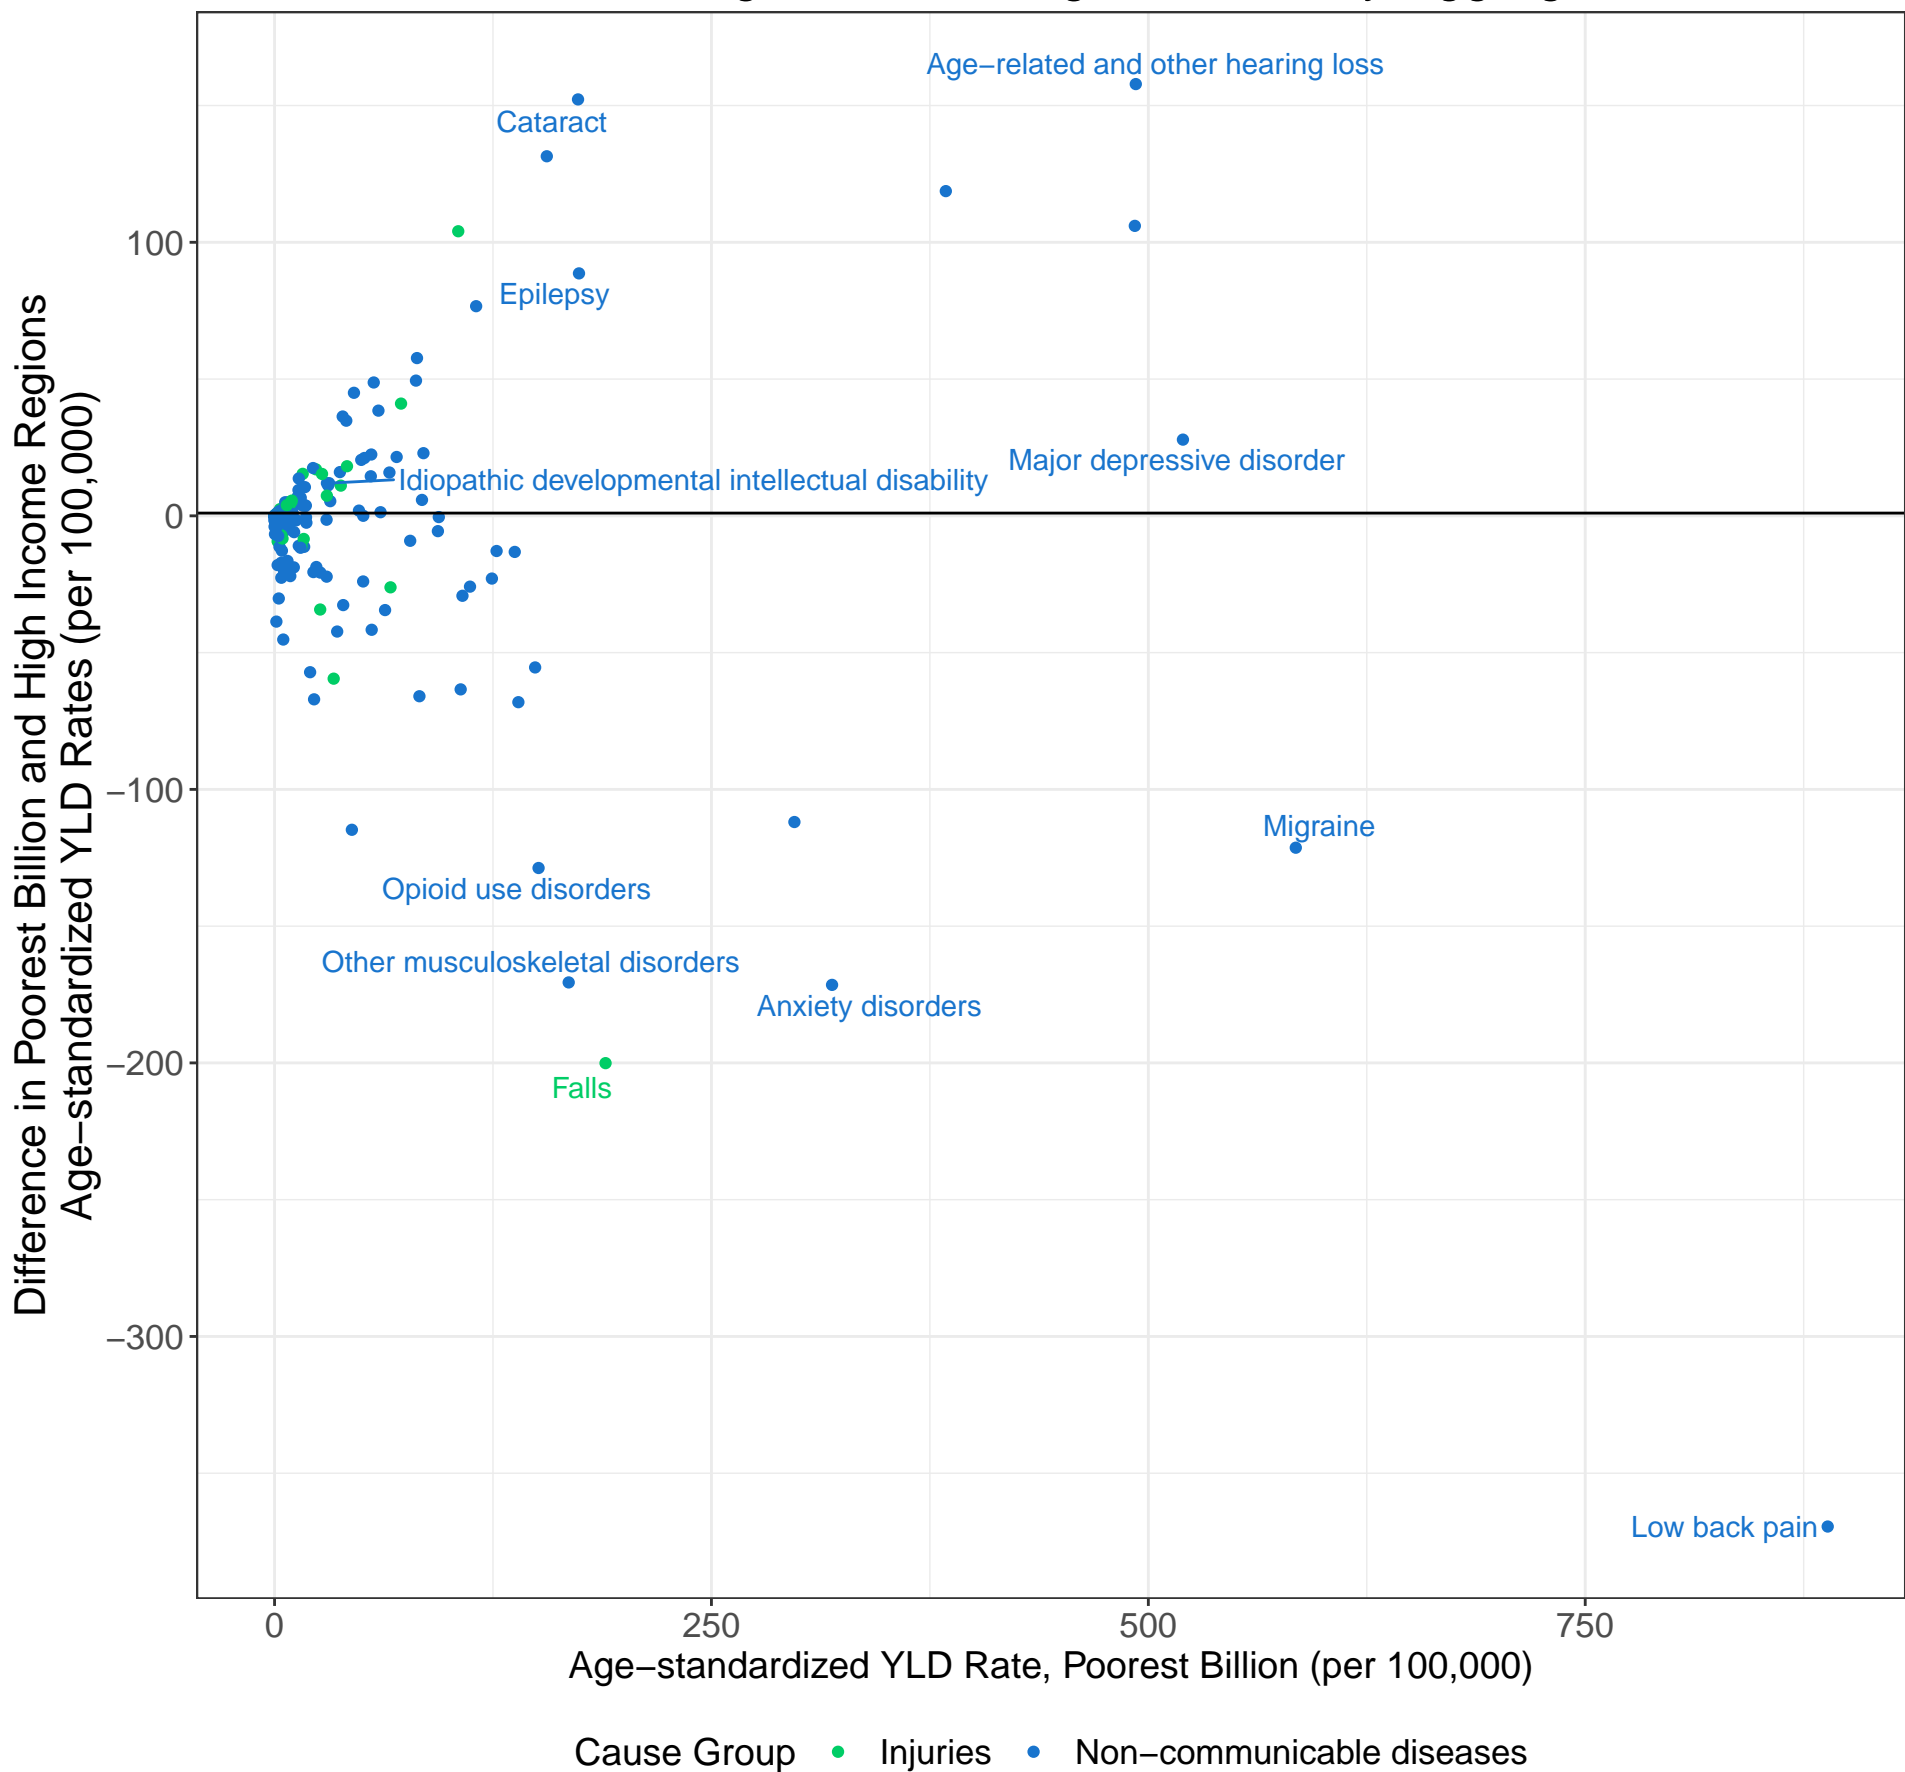

Appendix Figure 12i. Difference between Crude YLD Rates in Low-income and High-income Regions

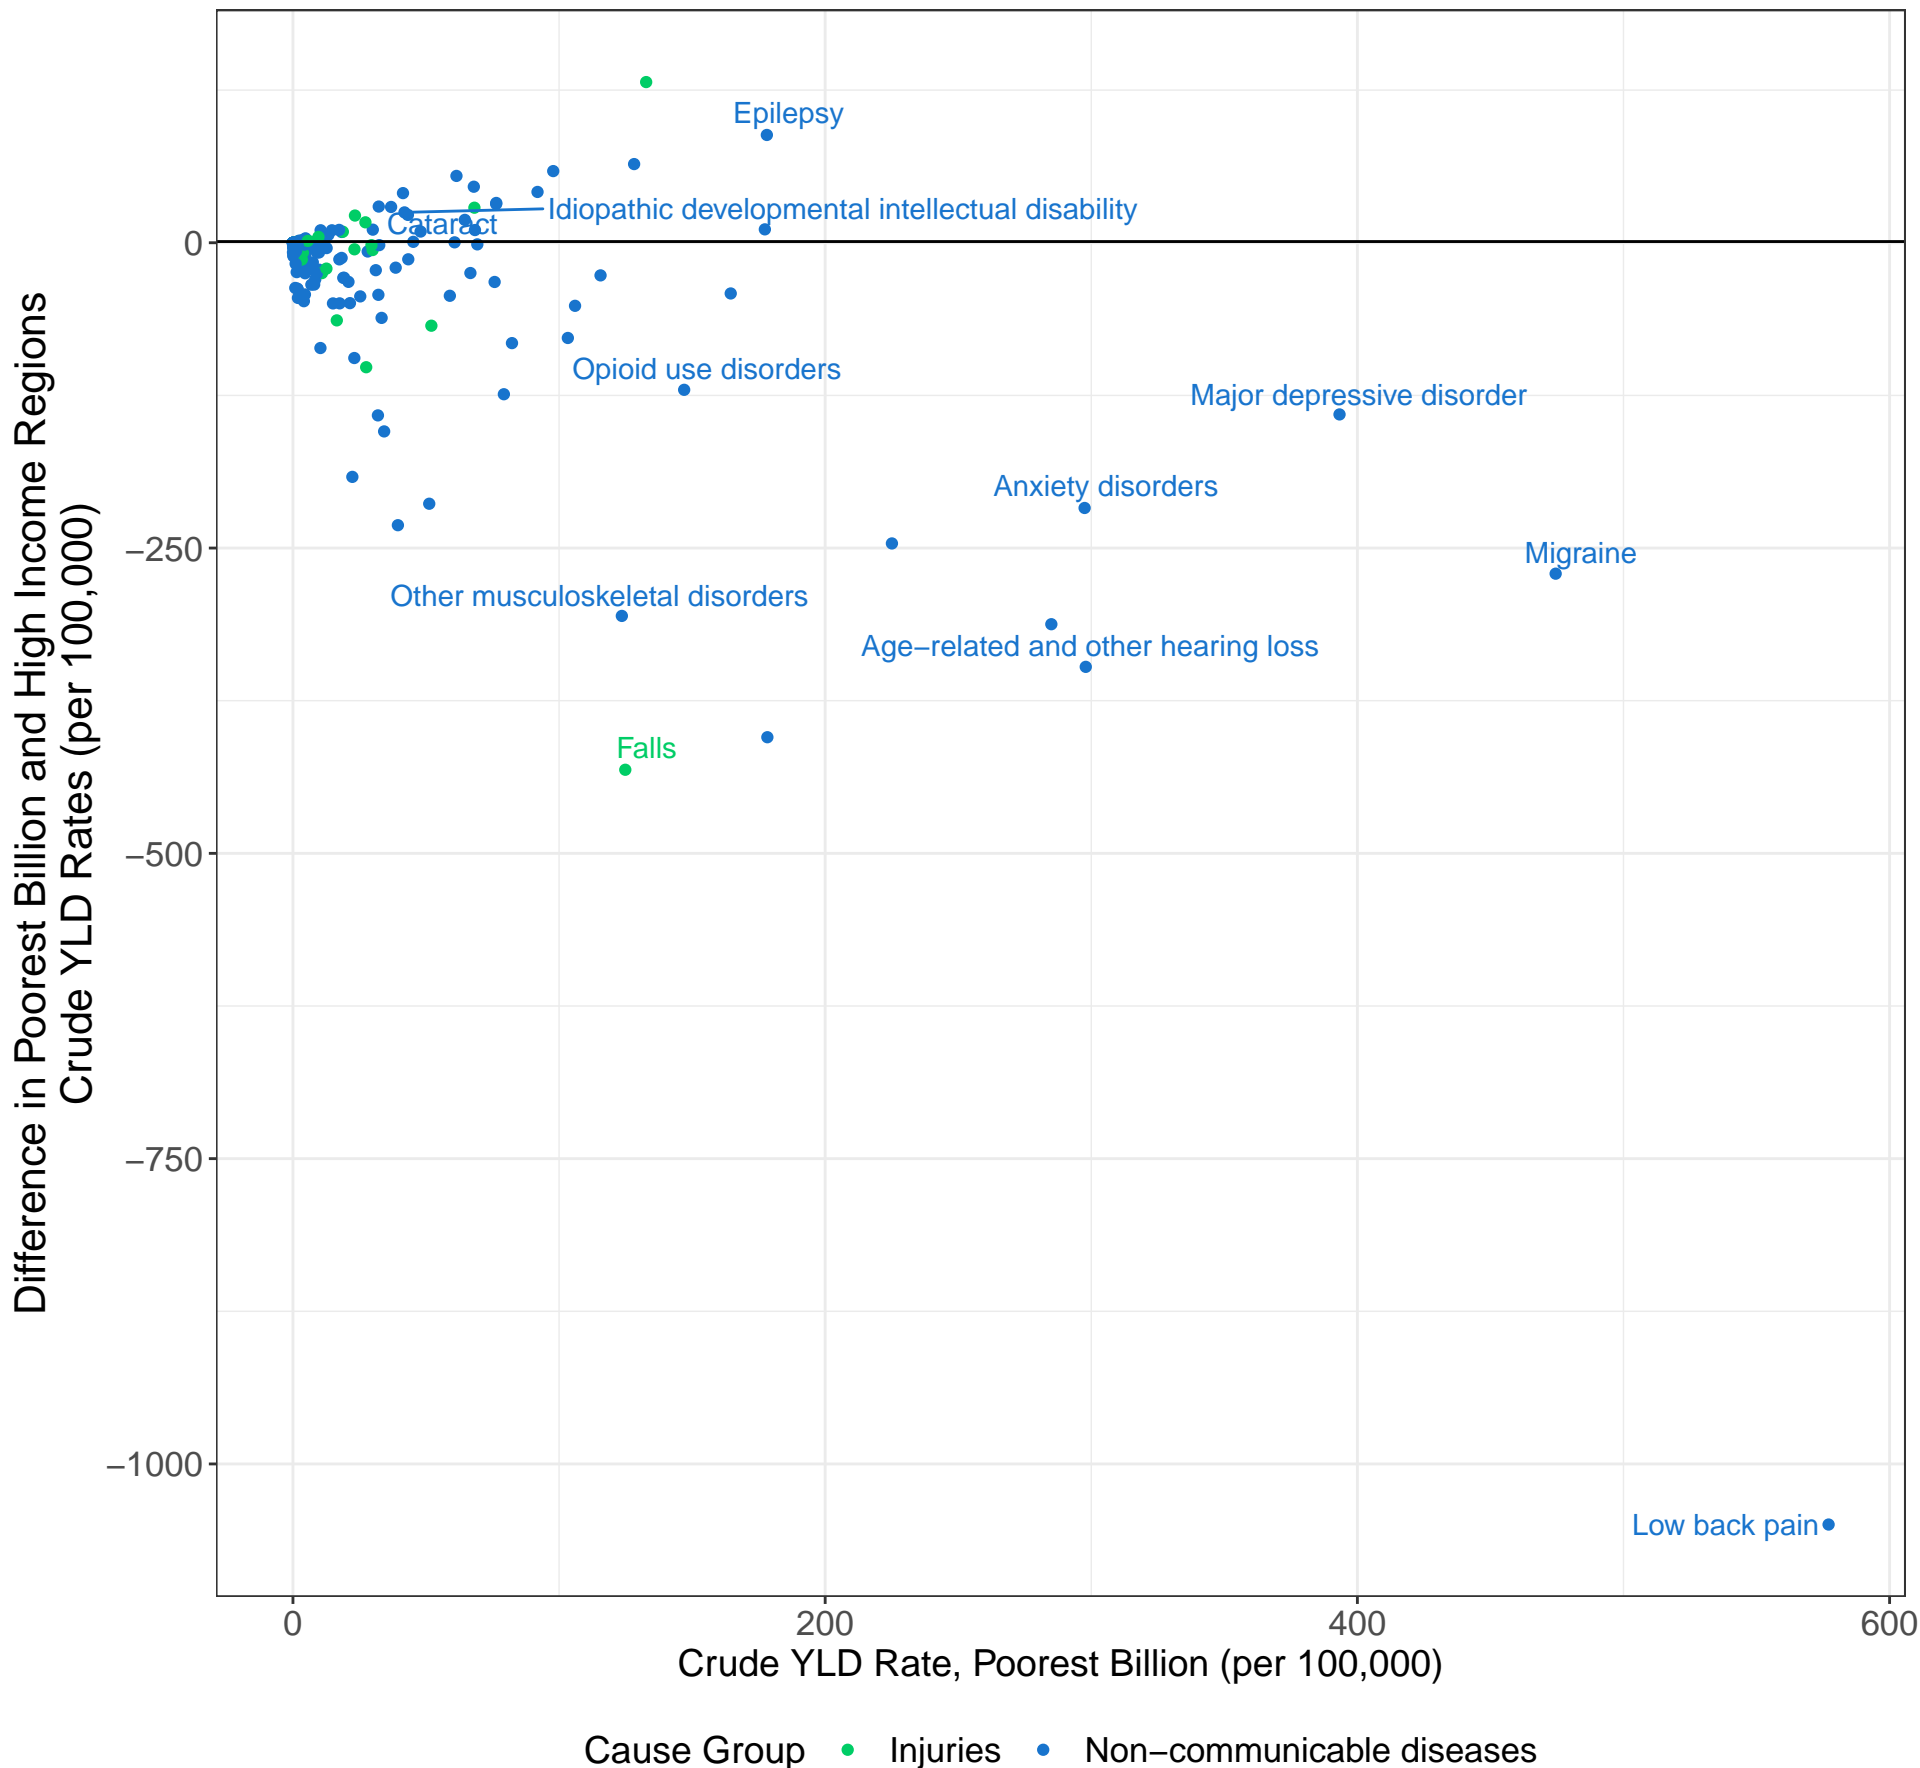

Appendix Figure 12j. Difference between Age-standardized YLD Rates in Low-income and High-income Regions

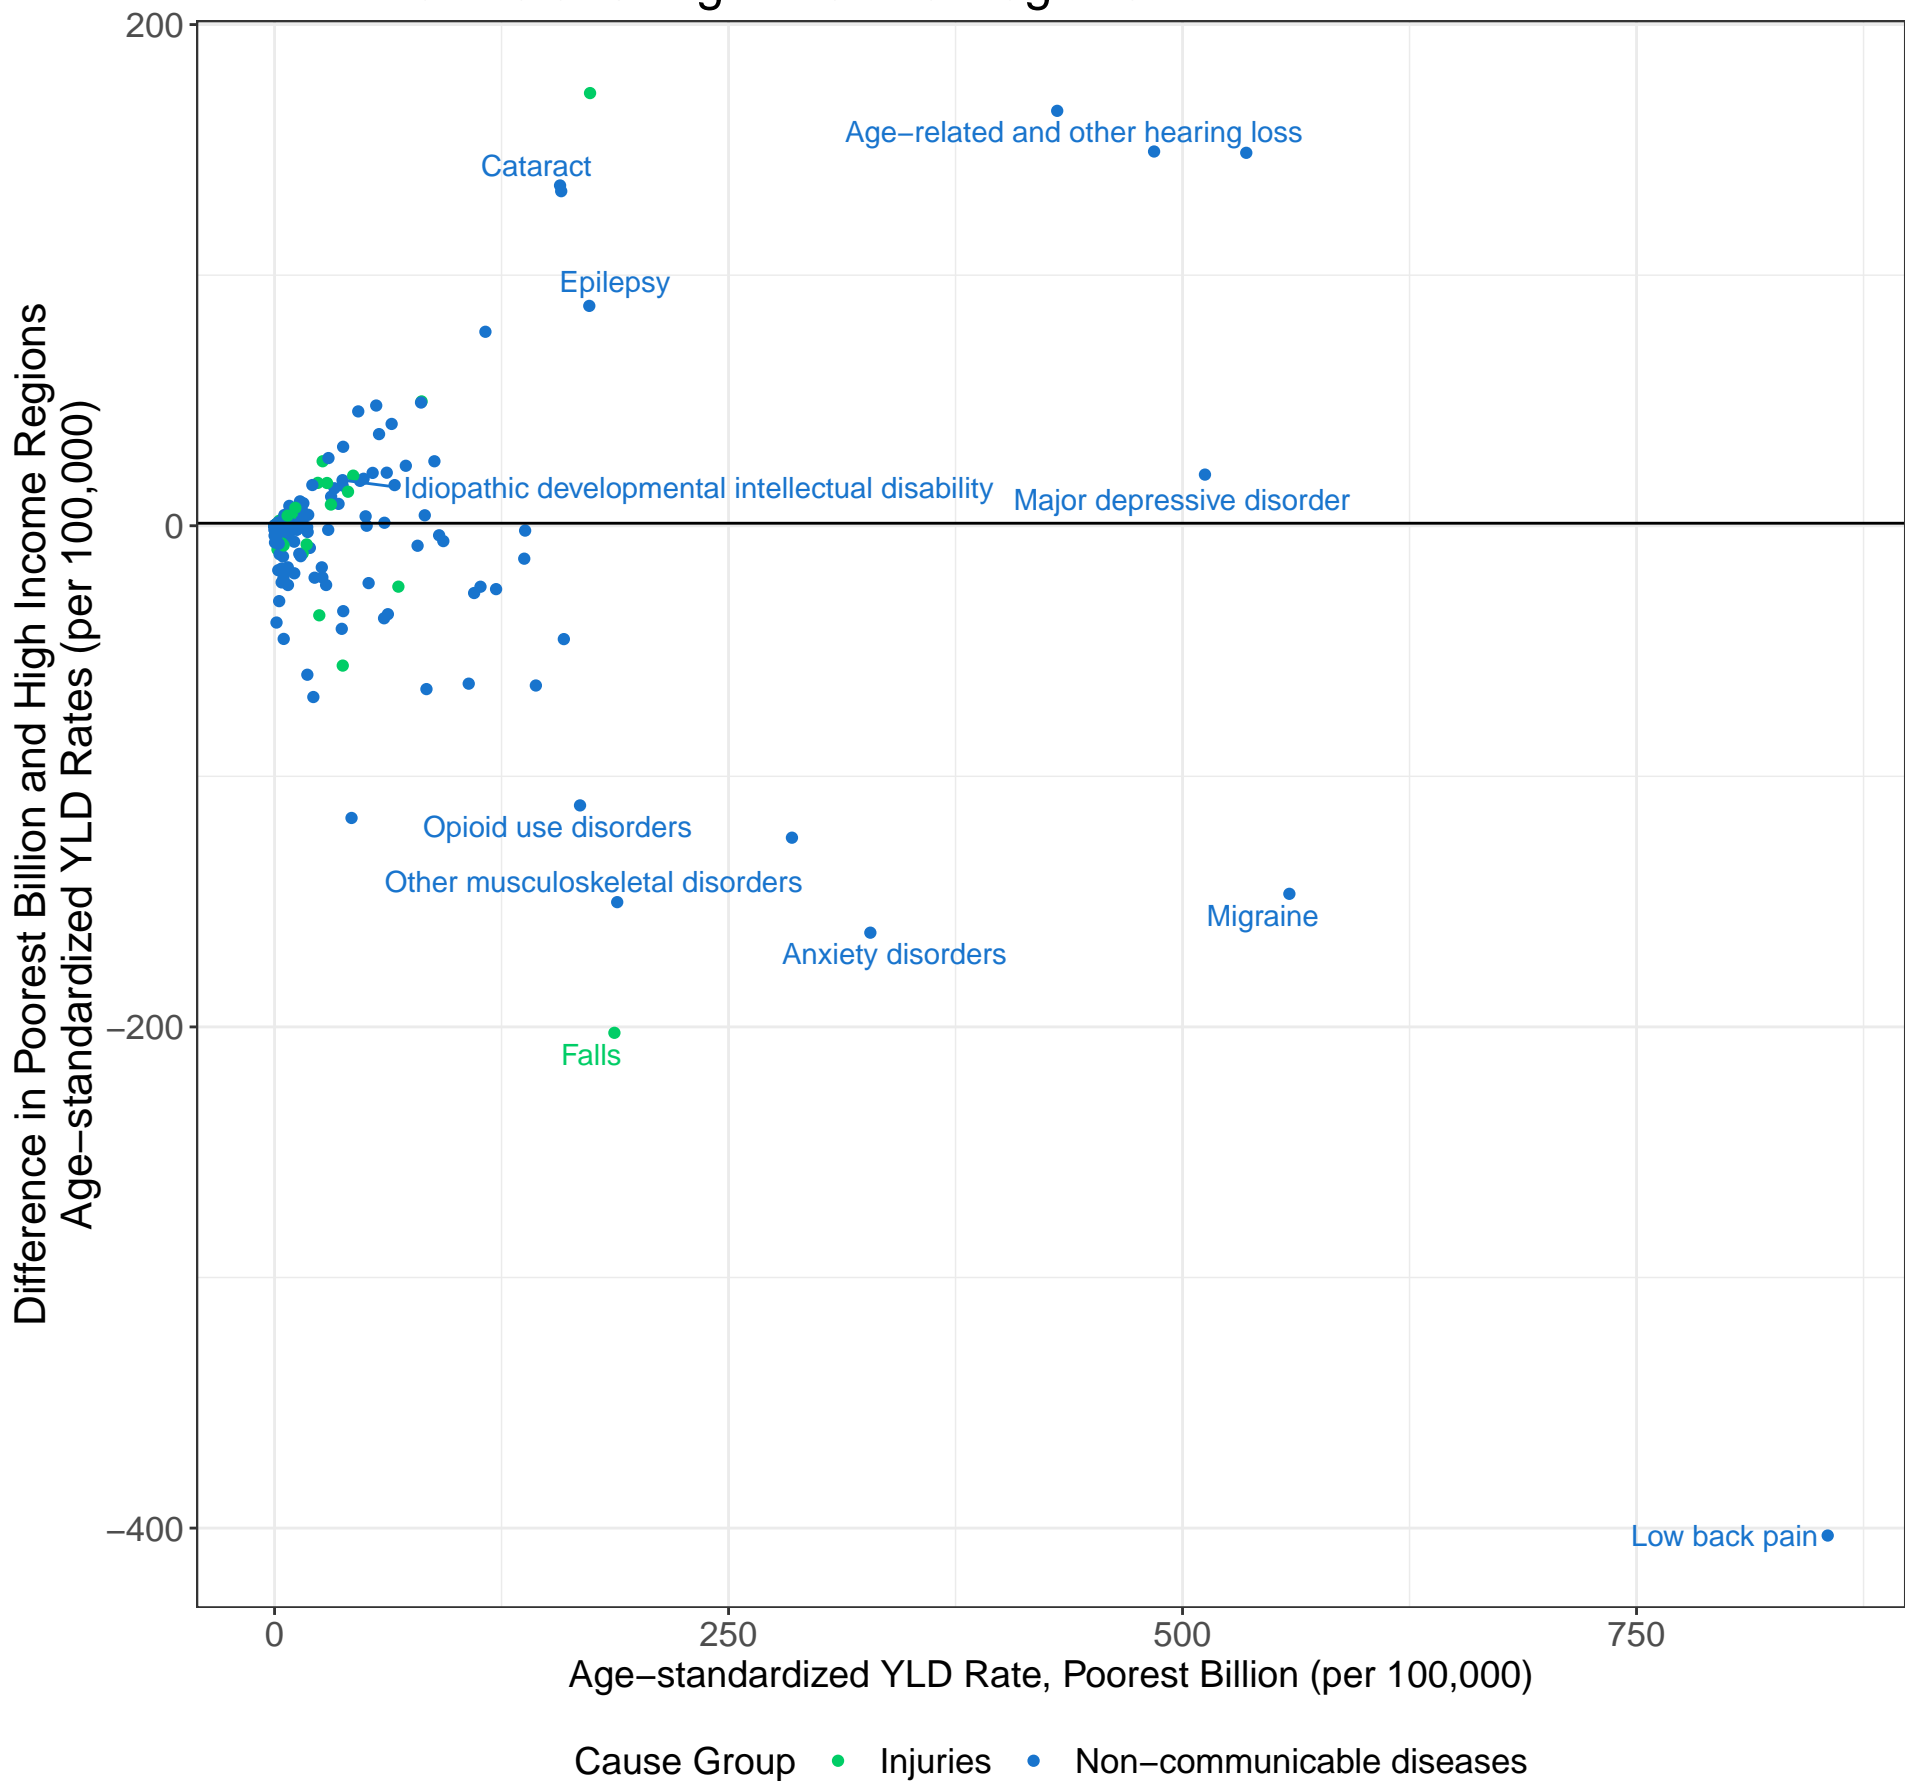

## Comparison of Estimation Methods

In general, the characteristics of disease burden across the five methods were similar. Comparatively young populations and high rates of communicable, nutritional, and neonatal disease in these populations shaped the disease burden. DALYs were dominated by YLLs rather than YLDs. Age-standardized rates of all three major categories of diseases, including NCDs, were higher among the group representing the poorest.

Yet, there were some differences between approaches that can be described in terms of geography, population structure, epidemiology of specific conditions, and modeling strategy. Using a definition of the poorest billion based on household socioeconomic status rather than country averages had implications on the country composition of where the poorest live as well as their age distribution. Of the 873 million people experiencing extreme deprivation according to our poverty index, 374 million (43%) lived outside of the countries used in the Country Aggregation approach and 471 million (54%) lived in countries outside of the World Bank low-income countries. Poorer populations within each country tended to be younger, and the populations in lower-income countries also tended to be younger. The geographic distribution of the populations using the different approaches was similar but somewhat varied. The strategies using household-level poverty included a substantial population in India (197 million) that was excluded by the country-level approaches. These geographic variations in approaches had some effect on the rates of specific conditions like HIV/AIDS, neglected tropical diseases, sickle cell disorders, and cervical cancer, which are more prevalent in much of sub-Saharan Africa. Compared to the other approaches, the ecological analyses tended to show somewhat greater disparities between the poorest billion and HIRs because of the within-country effects that they assumed.

## Example Analysis

Here, we show an example of how the Ecological Approach worked. In this example, we use diarrheal diseases in females aged 1 to 4 years. The logged death rates were regressed on the percent of the population in the poorest billion at the country level, with a random effect on region.

$$\log(\text{Death rate}_i) = \beta_0 + \beta_1 \text{PPB}_i + \gamma_r + \varepsilon$$

For this condition, the results from the regression are presented below in Appendix Table 7.

**Appendix Table 7: Regression example results**

|           | Estimate | Standard Error | t-value |
|-----------|----------|----------------|---------|
| $\beta_0$ | 1.9154   | 0.3586         | 5.342   |
| $\beta_1$ | 2.5447   | 0.4625         | 5.502   |

These results are visualized in Appendix Figure 13, where country-level observations are shown as points and the resulting predictions from the model are shown as lines. Note that the y-axis is log-transformed.

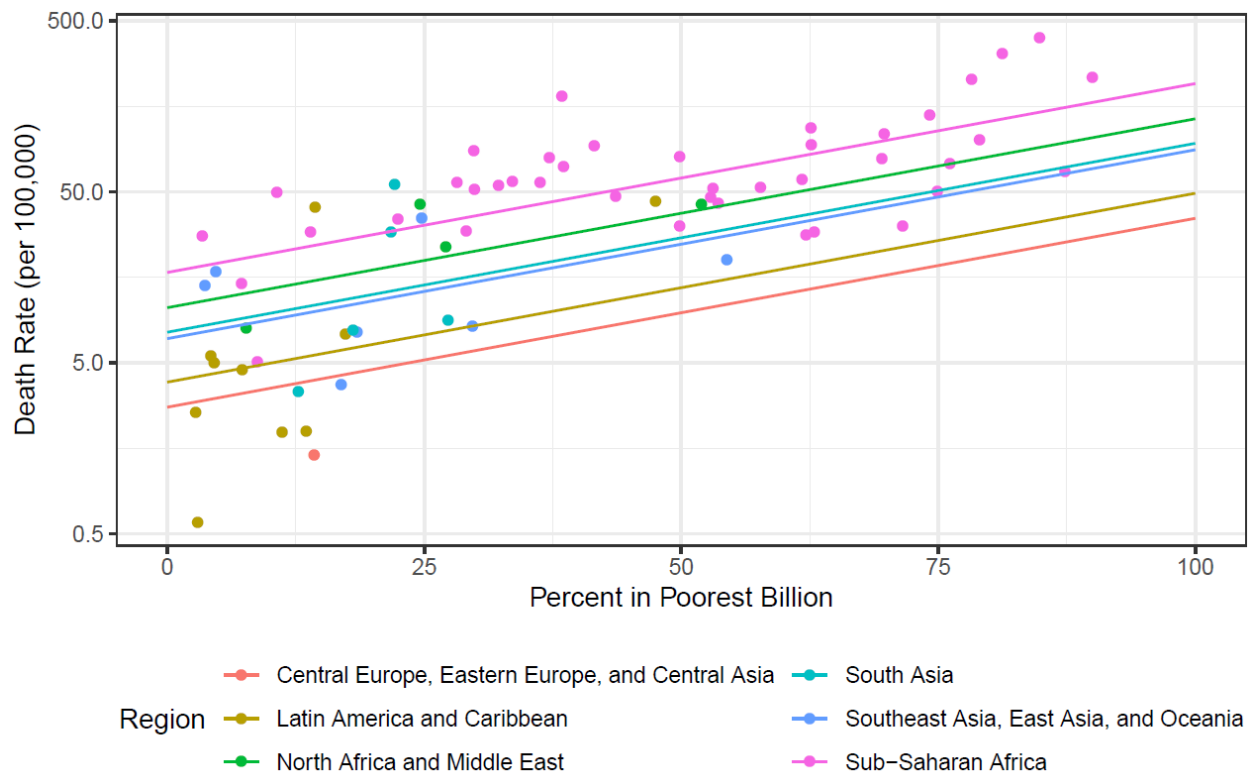

**Appendix Figure 13: Analysis example regression results**

For the poorest billion living in a given country, estimates of rates were generated by taking the model predictions at 100% living in the poorest billion. For the non-poorest, estimates were generated by taking the model predictions at 0% living in the poorest billion. For instance, in a country in Sub-Saharan Africa



in this example, the estimated death rate at 0% was 16.88 deaths per 100,000, and at 100%, the estimated death rate was 215.04 per 100,000.

Then, these rates were scaled such that the population-weighted average rate equalled the national-level rate. For instance, in Madagascar, 74.2% of females in the age group in question were thought to be among the poorest billion and the national-level death rate from diarrheal disease in that age and sex group was 139.48 per 100,000. We solved for the scalar (k in the equation below) that made the population-weighted average rate in the poorest billion and non-poorest equal the national-level rate.

$$k(\text{Rate}_{l,a,s,c}^{pb} * \text{Pop}_{l,a,s}^{pb} + \text{Rate}_{l,a,s,c}^{npb} * \text{Pop}_{l,a,s}^{npb}) = \text{Rate}_{l,a,s,c}^{GBD} * \text{Pop}_{l,a,s}^{GBD}$$

In the case of deaths from diarrheal disease in females aged 1 to 4 in Madagascar, this scalar was about 0.85. So, among females aged 1 to 4 in extreme poverty in Madagascar, the predicted death rate from diarrheal diseases was about 183 per 100,000 (about 215.04\*0.85), and among those not living in extreme poverty, the predicted death rate was about 14 per 100,000 (about 16.88\*0.85). This procedure was conducted for each country in which we produced results to obtain estimates of rates by poorest billion/non-poorest within each country. The regressions were conducted for each age, sex, and cause group. As described earlier in the appendix (pp 13-15), this procedure was conducted for every health condition in the Full Ecological approach. For the Selective Ecological approach, this procedure was conducted for conditions showing consistency between associations from these regressions and the results from the expert survey (see p 14-15). For other conditions, national-level rates were assumed.
